# Supplementary material for: Elemental profiling and genome-wide association studies reveal genomic variants modulating ionomic composition in Populus trichocarpa leaves
Source: Front Plant Sci. 2024 Nov 28;15:1450646. doi: 10.3389/fpls.2024.1450646 (PMC11634625; doi:10.3389/fpls.2024.1450646)
Supplement: Supplementary file 3 [file Table3.xlsx]

## Sheet: Table S3
Supplementary Data 3. Results of GWAS at a threshold of -log10 (p) >6.
SNP_Chr	SNP_pos	SNP_Pval	Target	GeneID	Gene.start	Gene.end	Gene.orientation	Relative_position	Minimum_distance_from_gene	SNP_name	SNP_-log10(Pval)	Bonferroni threshold	locusName	Pfam	Panther	KOG	ec	KO	GO	TF_family	Ath_locusName	Ath_synonym	Ath_full_name	Ath_short_description	Ath_Curator_summary	Ath_Computational_description	Ath_Pfam	Ath_Panther	Ath_KOG	Ath_KEGG/ec	Ath_KO	Ath_GO
8	4457162	6.07e-27	Na23	Potri.008G072100	4446804	4451671	-	3'	5491	8_4457162	26.2168	PASS
8	4457162	6.07e-27	Na23	Potri.008G072200	4461729	4463163	-	5'	4567	8_4457162	26.2168	PASS	Potri.008G072200	PF00462	PTHR10168,PTHR10168:SF68	-	-	K17479	GO:0045454,GO:0015035,GO:0009055	-	AT5G58530	-	Glutaredoxin family protein	Glutaredoxin family protein	-	Glutaredoxin family protein; FUNCTIONS IN: electron carrier activity, protein disulfide oxidoreductase activity; INVOLVED IN: cell redox homeostasis; EXPRESSED IN: 23 plant structures; EXPRESSED DURING: 15 growth stages; CONTAINS InterPro DOMAIN/s: Thioredoxin fold (InterPro:IPR012335), Glutaredoxin (InterPro:IPR002109), Thioredoxin-like fold (InterPro:IPR012336); BEST Arabidopsis thaliana protei…	PF00462	PTHR10168,PTHR10168:SF68	KOG2824	-	K17479	GO:0045454,GO:0015035,GO:0009055
8	4457162	6.07e-27	Na23	Potri.008G072300	4466871	4472906	-	5'	9709	8_4457162	26.2168	PASS	Potri.008G072300	PF04824,PF04825	PTHR12585,PTHR12585:SF26	KOG1213	-	K06670	GO:0000228,GO:0005515	-	AT5G05490	ATREC8	Rad21/Rec8-like family protein	Rad21/Rec8-like family protein	Encodes a RAD21-like gene essential for meiosis. Encodes a 627 a.a. protein that is slightly longer in the N-terminus than SYN1 BP5.	SYNAPTIC 1 (SYN1); CONTAINS InterPro DOMAIN/s: Rad21/Rec8 like protein, C-terminal (InterPro:IPR006909), Rad21/Rec8 like protein, N-terminal (InterPro:IPR006910); BEST Arabidopsis thaliana protein match is: sister chromatid cohesion 1 protein 4 (TAIR:AT5G16270.1); Has 648 Blast hits to 629 proteins in 171 species: Archae - 0; Bacteria - 0; Metazoa - 226; Fungi - 209; Plants - 165; Viruses - 0; Ot…	PF04824,PF04825	PTHR12585,PTHR12585:SF26	-	-	K06670	GO:0000228,GO:0005515
8	4457204	6.07e-27	Na23	Potri.008G072100	4446804	4451671	-	3'	5533	8_4457204	26.2168	PASS
8	4457204	6.07e-27	Na23	Potri.008G072200	4461729	4463163	-	5'	4525	8_4457204	26.2168	PASS	Potri.008G072200	PF00462	PTHR10168,PTHR10168:SF68	-	-	K17479	GO:0045454,GO:0015035,GO:0009055	-	AT5G58530	-	Glutaredoxin family protein	Glutaredoxin family protein	-	Glutaredoxin family protein; FUNCTIONS IN: electron carrier activity, protein disulfide oxidoreductase activity; INVOLVED IN: cell redox homeostasis; EXPRESSED IN: 23 plant structures; EXPRESSED DURING: 15 growth stages; CONTAINS InterPro DOMAIN/s: Thioredoxin fold (InterPro:IPR012335), Glutaredoxin (InterPro:IPR002109), Thioredoxin-like fold (InterPro:IPR012336); BEST Arabidopsis thaliana protei…	PF00462	PTHR10168,PTHR10168:SF68	KOG2824	-	K17479	GO:0045454,GO:0015035,GO:0009055
8	4457204	6.07e-27	Na23	Potri.008G072300	4466871	4472906	-	5'	9667	8_4457204	26.2168	PASS	Potri.008G072300	PF04824,PF04825	PTHR12585,PTHR12585:SF26	KOG1213	-	K06670	GO:0000228,GO:0005515	-	AT5G05490	ATREC8	Rad21/Rec8-like family protein	Rad21/Rec8-like family protein	Encodes a RAD21-like gene essential for meiosis. Encodes a 627 a.a. protein that is slightly longer in the N-terminus than SYN1 BP5.	SYNAPTIC 1 (SYN1); CONTAINS InterPro DOMAIN/s: Rad21/Rec8 like protein, C-terminal (InterPro:IPR006909), Rad21/Rec8 like protein, N-terminal (InterPro:IPR006910); BEST Arabidopsis thaliana protein match is: sister chromatid cohesion 1 protein 4 (TAIR:AT5G16270.1); Has 648 Blast hits to 629 proteins in 171 species: Archae - 0; Bacteria - 0; Metazoa - 226; Fungi - 209; Plants - 165; Viruses - 0; Ot…	PF04824,PF04825	PTHR12585,PTHR12585:SF26	-	-	K06670	GO:0000228,GO:0005515
8	4457206	6.07e-27	Na23	Potri.008G072100	4446804	4451671	-	3'	5535	8_4457206	26.2168	PASS
8	4457206	6.07e-27	Na23	Potri.008G072200	4461729	4463163	-	5'	4523	8_4457206	26.2168	PASS	Potri.008G072200	PF00462	PTHR10168,PTHR10168:SF68	-	-	K17479	GO:0045454,GO:0015035,GO:0009055	-	AT5G58530	-	Glutaredoxin family protein	Glutaredoxin family protein	-	Glutaredoxin family protein; FUNCTIONS IN: electron carrier activity, protein disulfide oxidoreductase activity; INVOLVED IN: cell redox homeostasis; EXPRESSED IN: 23 plant structures; EXPRESSED DURING: 15 growth stages; CONTAINS InterPro DOMAIN/s: Thioredoxin fold (InterPro:IPR012335), Glutaredoxin (InterPro:IPR002109), Thioredoxin-like fold (InterPro:IPR012336); BEST Arabidopsis thaliana protei…	PF00462	PTHR10168,PTHR10168:SF68	KOG2824	-	K17479	GO:0045454,GO:0015035,GO:0009055
8	4457206	6.07e-27	Na23	Potri.008G072300	4466871	4472906	-	5'	9665	8_4457206	26.2168	PASS	Potri.008G072300	PF04824,PF04825	PTHR12585,PTHR12585:SF26	KOG1213	-	K06670	GO:0000228,GO:0005515	-	AT5G05490	ATREC8	Rad21/Rec8-like family protein	Rad21/Rec8-like family protein	Encodes a RAD21-like gene essential for meiosis. Encodes a 627 a.a. protein that is slightly longer in the N-terminus than SYN1 BP5.	SYNAPTIC 1 (SYN1); CONTAINS InterPro DOMAIN/s: Rad21/Rec8 like protein, C-terminal (InterPro:IPR006909), Rad21/Rec8 like protein, N-terminal (InterPro:IPR006910); BEST Arabidopsis thaliana protein match is: sister chromatid cohesion 1 protein 4 (TAIR:AT5G16270.1); Has 648 Blast hits to 629 proteins in 171 species: Archae - 0; Bacteria - 0; Metazoa - 226; Fungi - 209; Plants - 165; Viruses - 0; Ot…	PF04824,PF04825	PTHR12585,PTHR12585:SF26	-	-	K06670	GO:0000228,GO:0005515
18	11512948	1.52e-26	Cu65	Potri.018G088100	11515103	11518476	+	5'	2155	18_11512948	25.8182	PASS	Potri.018G088100	PF08263,PF00560,PF13855,PF00069	PTHR27000,PTHR27000:SF155	KOG1187	2.7.11.1	-	GO:0005515,GO:0006468,GO:0005524,GO:0004672	-	AT5G25930	-	Protein kinase family protein with leucine-rich repeat domain	Protein kinase family protein with leucine-rich repeat domain	-	Protein kinase family protein with leucine-rich repeat domain; FUNCTIONS IN: kinase activity; INVOLVED IN: protein amino acid phosphorylation; LOCATED IN: plasma membrane, membrane; EXPRESSED IN: 23 plant structures; EXPRESSED DURING: 14 growth stages; CONTAINS InterPro DOMAIN/s: Protein kinase, ATP binding site (InterPro:IPR017441), Protein kinase, catalytic domain (InterPro:IPR000719), Leucine-…	PF08263,PF13855,PF00069	PTHR27000,PTHR27000:SF155	KOG1187	2.7.11.1	K00924	GO:0005515,GO:0006468,GO:0005524,GO:0004672
1	3757188	4.99e-20	Ni60	Potri.001G049400	3742165	3751589	-	3'	5599	1_3757188	19.3019	PASS	Potri.001G049400	PF08513,PF00400	PTHR22847,PTHR22847:SF502	KOG0266	-	-	GO:0005515	-	AT2G32700	LUH	LEUNIG_homolog	LEUNIG_homolog	Encodes a WD40 repeat and LUFS domain containing protein that is similar to LUG. Interacts physically with SEUSS and likely functions as part of a repressor complex that represses AG. Involved in cell wall modifications necessary for mucilage extrusion.	LEUNIG_homolog (LUH); FUNCTIONS IN: molecular_function unknown; INVOLVED IN: flower development, negative regulation of transcription, embryo development; LOCATED IN: cellular_component unknown; EXPRESSED IN: 22 plant structures; EXPRESSED DURING: 13 growth stages; CONTAINS InterPro DOMAIN/s: WD40 repeat 2 (InterPro:IPR019782), LisH dimerisation motif, subgroup (InterPro:IPR013720), WD40 repeat, …	PF08513,PF00400	PTHR22847,PTHR22847:SF502	KOG0266	-	-	GO:0005515
1	3757188	4.99e-20	Ni60	Potri.001G049500	3763184	3764758	+	5'	5996	1_3757188	19.3019	PASS	Potri.001G049500	PF14111	-	-	-	-	-	-	-	-	-	-	-	-	-	-	-	-	-	-
222	65669	2.72e-16	Na23	Potri.T125700	51741	59176	-	3'	6493	222_65669	15.5654	PASS	Potri.T125700	PF00076	PTHR23147,PTHR23147:SF10	KOG4207	-	K12891	GO:0003676	-	AT5G64200	ATSC35	ortholog of human splicing factor SC35	ortholog of human splicing factor SC35	encodes an SC35-like splicing factor of 35 kD localized to the nuclear specks.	ortholog of human splicing factor SC35 (SC35); FUNCTIONS IN: RNA binding, nucleotide binding, nucleic acid binding; INVOLVED IN: nuclear mRNA splicing, via spliceosome, RNA splicing; LOCATED IN: cytosol, nuclear speck, membrane; EXPRESSED IN: 24 plant structures; EXPRESSED DURING: 13 growth stages; CONTAINS InterPro DOMAIN/s: RNA recognition motif, RNP-1 (InterPro:IPR000504), Nucleotide-binding, …	PF00076	PTHR23147,PTHR23147:SF10	KOG4207	-	K12891	GO:0003676
12	13257527	3.56e-15	Na23	Potri.012G110300	13247139	13249213	+	3'	8314	12_13257527	14.4486	PASS	Potri.012G110300	PF07712	PTHR33390,PTHR33390:SF1	-	-	-	-	-	AT5G61820	-	-	-	-	FUNCTIONS IN: molecular_function unknown; INVOLVED IN: biological_process unknown; LOCATED IN: vacuole; EXPRESSED IN: 24 plant structures; EXPRESSED DURING: 15 growth stages; CONTAINS InterPro DOMAIN/s: Stress up-regulated Nod 19 (InterPro:IPR011692); Has 30201 Blast hits to 17322 proteins in 780 species: Archae - 12; Bacteria - 1396; Metazoa - 17338; Fungi - 3422; Plants - 5037; Viruses - 0; Oth…	PF07712	PTHR33390,PTHR33390:SF1	-	-	-	-
12	13257527	3.56e-15	Na23	Potri.012G110400	13256112	13261569	-	in gene	0	12_13257527	14.4486	PASS	Potri.012G110400	PF07722	PTHR11315	KOG1559	3.4.19.9	K01307	GO:0016787,GO:0006541,GO:0008242,GO:0003824	-	AT1G78680	ATGGH2	gamma-glutamyl hydrolase 2	gamma-glutamyl hydrolase 2	The Arabidopsis protein AtGGH2 is a gamma-glutamyl hydrolase acting specifically on monoglutamates. The enzyme is involved in the tetrahydrofolate metabolism and located to the vacuole.	gamma-glutamyl hydrolase 2 (GGH2); FUNCTIONS IN: omega peptidase activity; INVOLVED IN: tetrahydrofolylpolyglutamate metabolic process; LOCATED IN: vacuole; EXPRESSED IN: 22 plant structures; EXPRESSED DURING: 13 growth stages; CONTAINS InterPro DOMAIN/s: Peptidase C26, gamma-glutamyl hydrolase (InterPro:IPR015527), Peptidase C26 (InterPro:IPR011697); BEST Arabidopsis thaliana protein match is: g…	PF07722	PTHR11315	-	3.4.19.9	K01307	GO:0016787,GO:0006541,GO:0008242,GO:0003824
8	4457143	1.74e-14	Na23	Potri.008G072100	4446804	4451671	-	3'	5472	8_4457143	13.7595	PASS
8	4457143	1.74e-14	Na23	Potri.008G072200	4461729	4463163	-	5'	4586	8_4457143	13.7595	PASS	Potri.008G072200	PF00462	PTHR10168,PTHR10168:SF68	-	-	K17479	GO:0045454,GO:0015035,GO:0009055	-	AT5G58530	-	Glutaredoxin family protein	Glutaredoxin family protein	-	Glutaredoxin family protein; FUNCTIONS IN: electron carrier activity, protein disulfide oxidoreductase activity; INVOLVED IN: cell redox homeostasis; EXPRESSED IN: 23 plant structures; EXPRESSED DURING: 15 growth stages; CONTAINS InterPro DOMAIN/s: Thioredoxin fold (InterPro:IPR012335), Glutaredoxin (InterPro:IPR002109), Thioredoxin-like fold (InterPro:IPR012336); BEST Arabidopsis thaliana protei…	PF00462	PTHR10168,PTHR10168:SF68	KOG2824	-	K17479	GO:0045454,GO:0015035,GO:0009055
8	4457143	1.74e-14	Na23	Potri.008G072300	4466871	4472906	-	5'	9728	8_4457143	13.7595	PASS	Potri.008G072300	PF04824,PF04825	PTHR12585,PTHR12585:SF26	KOG1213	-	K06670	GO:0000228,GO:0005515	-	AT5G05490	ATREC8	Rad21/Rec8-like family protein	Rad21/Rec8-like family protein	Encodes a RAD21-like gene essential for meiosis. Encodes a 627 a.a. protein that is slightly longer in the N-terminus than SYN1 BP5.	SYNAPTIC 1 (SYN1); CONTAINS InterPro DOMAIN/s: Rad21/Rec8 like protein, C-terminal (InterPro:IPR006909), Rad21/Rec8 like protein, N-terminal (InterPro:IPR006910); BEST Arabidopsis thaliana protein match is: sister chromatid cohesion 1 protein 4 (TAIR:AT5G16270.1); Has 648 Blast hits to 629 proteins in 171 species: Archae - 0; Bacteria - 0; Metazoa - 226; Fungi - 209; Plants - 165; Viruses - 0; Ot…	PF04824,PF04825	PTHR12585,PTHR12585:SF26	-	-	K06670	GO:0000228,GO:0005515
4	17405256	1.31e-13	Cu65	Potri.004G152000	17394422	17397013	-	3'	8243	4_17405256	12.8827	PASS	Potri.004G152000	PF13041,PF01535	PTHR24015,PTHR24015:SF714	-	-	-	-	-	AT3G18840	-	Tetratricopeptide repeat (TPR)-like superfamily protein	Tetratricopeptide repeat (TPR)-like superfamily protein	-	Tetratricopeptide repeat (TPR)-like superfamily protein; CONTAINS InterPro DOMAIN/s: Pentatricopeptide repeat (InterPro:IPR002885); BEST Arabidopsis thaliana protein match is: Pentatricopeptide repeat (PPR) superfamily protein (TAIR:AT2G13600.1); Has 42936 Blast hits to 13106 proteins in 190 species: Archae - 0; Bacteria - 3; Metazoa - 51; Fungi - 30; Plants - 42456; Viruses - 0; Other Eukaryotes…	PF13041,PF01535	PTHR24015,PTHR24015:SF714	-	-	-	-
4	17405256	1.31e-13	Cu65	Potri.004G152100	17397729	17401939	-	3'	3317	4_17405256	12.8827	PASS	Potri.004G152100	PF00294	PTHR10584,PTHR10584:SF188	KOG2855	-	-	-	-	AT1G49350	-	pfkB-like carbohydrate kinase family protein	pfkB-like carbohydrate kinase family protein	-	pfkB-like carbohydrate kinase family protein; FUNCTIONS IN: kinase activity, ribokinase activity; INVOLVED IN: D-ribose metabolic process; LOCATED IN: cellular_component unknown; EXPRESSED IN: 22 plant structures; EXPRESSED DURING: 13 growth stages; CONTAINS InterPro DOMAIN/s: Carbohydrate/purine kinase (InterPro:IPR011611), Ribokinase (InterPro:IPR002139), Carbohydrate/puine kinase, PfkB, conser…	PF00294	PTHR10584,PTHR10584:SF188	KOG2855	2.7.1.83	-	-
4	17405256	1.31e-13	Cu65	Potri.004G152200	17408424	17408594	+	5'	3168	4_17405256	12.8827	PASS
11	2491280	2.53e-13	Ni60	Potri.011G029900	2482452	2483486	-	3'	7794	11_2491280	12.5969	PASS	Potri.011G029900	PF01657	PTHR32099,PTHR32099:SF4	-	-	-	-	-	AT4G38830	CRK26	cysteine-rich RLK (RECEPTOR-like protein kinase) 26	cysteine-rich RLK (RECEPTOR-like protein kinase) 26	Encodes a cysteine-rich receptor-like protein kinase.	cysteine-rich RLK (RECEPTOR-like protein kinase) 26 (CRK26); FUNCTIONS IN: kinase activity; INVOLVED IN: protein amino acid phosphorylation; LOCATED IN: endomembrane system; EXPRESSED IN: stem, root; CONTAINS InterPro DOMAIN/s: Protein kinase, ATP binding site (InterPro:IPR017441), Serine/threonine-protein kinase domain (InterPro:IPR002290), Protein of unknown function DUF26 (InterPro:IPR002902),…	PF01657,PF07714	PTHR27002,PTHR27002:SF122	KOG1187	2.7.11.1	-	GO:0006468,GO:0004672
11	2491280	2.53e-13	Ni60	Potri.011G030000	2491719	2495274	+	5'	439	11_2491280	12.5969	PASS	Potri.011G030000	PF01657,PF07714	PTHR27002,PTHR27002:SF122	KOG1187	2.7.11.1	-	GO:0006468,GO:0004672	-	AT4G21410	CRK29	cysteine-rich RLK (RECEPTOR-like protein kinase) 29	cysteine-rich RLK (RECEPTOR-like protein kinase) 29	Encodes a cysteine-rich receptor-like protein kinase.	cysteine-rich RLK (RECEPTOR-like protein kinase) 29 (CRK29); FUNCTIONS IN: kinase activity; INVOLVED IN: response to abscisic acid stimulus; LOCATED IN: plasma membrane, vacuole; EXPRESSED IN: 21 plant structures; EXPRESSED DURING: 13 growth stages; CONTAINS InterPro DOMAIN/s: Protein kinase, ATP binding site (InterPro:IPR017441), Protein kinase, catalytic domain (InterPro:IPR000719), Protein of …	PF01657,PF07714	PTHR27002,PTHR27002:SF122	KOG1187	2.7.11.1	-	GO:0006468,GO:0004672
11	2491280	2.53e-13	Ni60	Potri.011G030100	2498825	2501770	+	5'	7545	11_2491280	12.5969	PASS	Potri.011G030100	PF01657,PF00069	PTHR27002	KOG1187	2.7.11.1	-	GO:0006468,GO:0005524,GO:0004672	-	AT4G23220	CRK14	cysteine-rich RLK (RECEPTOR-like protein kinase) 14	cysteine-rich RLK (RECEPTOR-like protein kinase) 14	Encodes a cysteine-rich receptor-like protein kinase.	cysteine-rich RLK (RECEPTOR-like protein kinase) 14 (CRK14); FUNCTIONS IN: kinase activity; INVOLVED IN: protein amino acid phosphorylation; LOCATED IN: cellular_component unknown; EXPRESSED IN: 14 plant structures; EXPRESSED DURING: 9 growth stages; CONTAINS InterPro DOMAIN/s: Protein kinase, ATP binding site (InterPro:IPR017441), Serine/threonine-protein kinase domain (InterPro:IPR002290), Prot…	PF01657,PF07714	PTHR27002	KOG1187	2.7.11.1	-	GO:0006468,GO:0004672
4	17404994	6.86e-12	Cu65	Potri.004G152000	17394422	17397013	-	3'	7981	4_17404994	11.1637	PASS	Potri.004G152000	PF13041,PF01535	PTHR24015,PTHR24015:SF714	-	-	-	-	-	AT3G18840	-	Tetratricopeptide repeat (TPR)-like superfamily protein	Tetratricopeptide repeat (TPR)-like superfamily protein	-	Tetratricopeptide repeat (TPR)-like superfamily protein; CONTAINS InterPro DOMAIN/s: Pentatricopeptide repeat (InterPro:IPR002885); BEST Arabidopsis thaliana protein match is: Pentatricopeptide repeat (PPR) superfamily protein (TAIR:AT2G13600.1); Has 42936 Blast hits to 13106 proteins in 190 species: Archae - 0; Bacteria - 3; Metazoa - 51; Fungi - 30; Plants - 42456; Viruses - 0; Other Eukaryotes…	PF13041,PF01535	PTHR24015,PTHR24015:SF714	-	-	-	-
4	17404994	6.86e-12	Cu65	Potri.004G152100	17397729	17401939	-	3'	3055	4_17404994	11.1637	PASS	Potri.004G152100	PF00294	PTHR10584,PTHR10584:SF188	KOG2855	-	-	-	-	AT1G49350	-	pfkB-like carbohydrate kinase family protein	pfkB-like carbohydrate kinase family protein	-	pfkB-like carbohydrate kinase family protein; FUNCTIONS IN: kinase activity, ribokinase activity; INVOLVED IN: D-ribose metabolic process; LOCATED IN: cellular_component unknown; EXPRESSED IN: 22 plant structures; EXPRESSED DURING: 13 growth stages; CONTAINS InterPro DOMAIN/s: Carbohydrate/purine kinase (InterPro:IPR011611), Ribokinase (InterPro:IPR002139), Carbohydrate/puine kinase, PfkB, conser…	PF00294	PTHR10584,PTHR10584:SF188	KOG2855	2.7.1.83	-	-
4	17404994	6.86e-12	Cu65	Potri.004G152200	17408424	17408594	+	5'	3430	4_17404994	11.1637	PASS
8	4454394	6.9e-12	Na23	Potri.008G071900	4441135	4444407	+	3'	9987	8_4454394	11.1612	PASS	Potri.008G071900	PF08311	PTHR14030,PTHR14030:SF2	-	-	-	GO:0007094	-	AT5G05510	-	Mad3/BUB1 homology region 1	Mad3/BUB1 homology region 1	-	Mad3/BUB1 homology region 1; CONTAINS InterPro DOMAIN/s: Mitotic checkpoint serine/threonine protein kinase, Bub1 (InterPro:IPR015661), Mad3/BUB1 homology region 1 (InterPro:IPR013212); BEST Arabidopsis thaliana protein match is: BUB1-related (BUB1: budding uninhibited by benzymidazol 1) (TAIR:AT2G33560.2); Has 1807 Blast hits to 1807 proteins in 277 species: Archae - 0; Bacteria - 0; Metazoa - 7…	PF08311	PTHR14030,PTHR14030:SF2	-	-	-	GO:0007094
8	4454394	6.9e-12	Na23	Potri.008G072000	4444543	4445382	-	3'	9012	8_4454394	11.1612	PASS	Potri.008G072000	PF01190	PTHR31614,PTHR31614:SF10	-	-	-	-	-	AT5G05500	-	Pollen Ole e 1 allergen and extensin family protein	Pollen Ole e 1 allergen and extensin family protein	-	Pollen Ole e 1 allergen and extensin family protein; FUNCTIONS IN: molecular_function unknown; INVOLVED IN: biological_process unknown; LOCATED IN: endomembrane system; EXPRESSED IN: root; CONTAINS InterPro DOMAIN/s: Pollen Ole e 1 allergen/extensin (InterPro:IPR006041); BEST Arabidopsis thaliana protein match is: Pollen Ole e 1 allergen and extensin family protein (TAIR:AT2G34700.1); Has 30201 B…	PF01190	PTHR31614,PTHR31614:SF10	-	-	-	-
8	4454394	6.9e-12	Na23	Potri.008G072100	4446804	4451671	-	3'	2723	8_4454394	11.1612	PASS
8	4454394	6.9e-12	Na23	Potri.008G072200	4461729	4463163	-	5'	7335	8_4454394	11.1612	PASS	Potri.008G072200	PF00462	PTHR10168,PTHR10168:SF68	-	-	K17479	GO:0045454,GO:0015035,GO:0009055	-	AT5G58530	-	Glutaredoxin family protein	Glutaredoxin family protein	-	Glutaredoxin family protein; FUNCTIONS IN: electron carrier activity, protein disulfide oxidoreductase activity; INVOLVED IN: cell redox homeostasis; EXPRESSED IN: 23 plant structures; EXPRESSED DURING: 15 growth stages; CONTAINS InterPro DOMAIN/s: Thioredoxin fold (InterPro:IPR012335), Glutaredoxin (InterPro:IPR002109), Thioredoxin-like fold (InterPro:IPR012336); BEST Arabidopsis thaliana protei…	PF00462	PTHR10168,PTHR10168:SF68	KOG2824	-	K17479	GO:0045454,GO:0015035,GO:0009055
18	14277823	1.2e-11	P31	Potri.018G118400	14268765	14268965	-	3'	8858	18_14277823	10.9208	PASS	Potri.018G118400	-	-	-	-	-	-	-	AT1G15740	-	Leucine-rich repeat family protein	Leucine-rich repeat family protein	-	Leucine-rich repeat family protein; BEST Arabidopsis thaliana protein match is: Leucine-rich repeat (LRR) family protein (TAIR:AT4G23840.1); Has 38052 Blast hits to 19856 proteins in 856 species: Archae - 6; Bacteria - 8624; Metazoa - 11681; Fungi - 680; Plants - 12072; Viruses - 79; Other Eukaryotes - 4910 (source: NCBI BLink).	PF13855	PTHR24006,PTHR24006:SF451	-	-	-	GO:0005515
18	14277823	1.2e-11	P31	Potri.018G118500	14275754	14277330	-	3'	493	18_14277823	10.9208	PASS	Potri.018G118500	PF12796	PTHR24161,PTHR24161:SF22	KOG4214	2.3.1.225	-	-	-	AT5G20350	TIP1	Ankyrin repeat family protein with DHHC zinc finger domain	Ankyrin repeat family protein with DHHC zinc finger domain	Encodes a protein containing ankyrin and DHHC-CRD domain. Acts to restrict the size of the swelling that forms at the beginning of root hair cell growth, possibly by a mechanism that requires RHD1. Mutant displays defects in both root hair and pollen tube growth.	TIP GROWTH DEFECTIVE 1 (TIP1); FUNCTIONS IN: acyl binding, S-acyltransferase activity; INVOLVED IN: response to salt stress, cell tip growth; EXPRESSED IN: 28 plant structures; EXPRESSED DURING: 15 growth stages; CONTAINS InterPro DOMAIN/s: Zinc finger, DHHC-type (InterPro:IPR001594), Ankyrin repeat-containing domain (InterPro:IPR020683), Ankyrin repeat (InterPro:IPR002110); BEST Arabidopsis thal…	PF12796,PF01529	PTHR24161,PTHR24161:SF22	-	2.3.1.225	K18932	GO:0008270
18	14277823	1.2e-11	P31	Potri.018G118600	14287532	14288134	+	5'	9709	18_14277823	10.9208	PASS	Potri.018G118600	PF03171	PTHR10209,PTHR10209:SF107	-	1.14.11.32	-	GO:0055114,GO:0016491	-	AT1G49390	-	2-oxoglutarate (2OG) and Fe(II)-dependent oxygenase superfamily protein	2-oxoglutarate (2OG) and Fe(II)-dependent oxygenase superfamily protein	-	2-oxoglutarate (2OG) and Fe(II)-dependent oxygenase superfamily protein; FUNCTIONS IN: oxidoreductase activity, acting on paired donors, with incorporation or reduction of molecular oxygen, 2-oxoglutarate as one donor, and incorporation of one atom each of oxygen into both donors, oxidoreductase activity; INVOLVED IN: flavonoid biosynthetic process; LOCATED IN: cellular_component unknown; EXPRESS…	PF03171,PF14226	PTHR10209,PTHR10209:SF107	KOG0143	1.14.11.32	-	GO:0055114,GO:0016491
16	1919102	1.77e-11	Al27	Potri.016G033200	1915710	1919169	+	in gene	0	16_1919102	10.752	PASS	Potri.016G033200	PF03953,PF00091	PTHR11588,PTHR11588:SF114	-	2.4.2.1	K07375	GO:0003924,GO:0007017,GO:0005874	-	AT5G12250	TUB6	beta-6 tubulin	beta-6 tubulin	Encodes a beta-tubulin. Expression of TUB6 has been shown to decrease in response to cold treatment.	beta-6 tubulin (TUB6); FUNCTIONS IN: structural constituent of cytoskeleton; INVOLVED IN: microtubule-based process, response to salt stress, response to cold; LOCATED IN: microtubule cytoskeleton, plasma membrane; EXPRESSED IN: 23 plant structures; EXPRESSED DURING: 13 growth stages; CONTAINS InterPro DOMAIN/s: Beta tubulin (InterPro:IPR002453), Tubulin (InterPro:IPR000217), Tubulin/FtsZ, GTPase…	PF03953,PF00091	PTHR11588,PTHR11588:SF106	-	2.4.2.1	K07375	GO:0003924,GO:0007017,GO:0005874
16	1919102	1.77e-11	Al27	Potri.016G033300	1926919	1931327	-	5'	7817	16_1919102	10.752	PASS	Potri.016G033300	PF08711	PTHR15141,PTHR15141:SF40	-	-	-	GO:0006351,GO:0005634,GO:0003677	-	AT5G05140	-	Transcription elongation factor (TFIIS) family protein	Transcription elongation factor (TFIIS) family protein	-	Transcription elongation factor (TFIIS) family protein; FUNCTIONS IN: transcription regulator activity, DNA binding; INVOLVED IN: transcription; LOCATED IN: nucleus; EXPRESSED IN: 24 plant structures; EXPRESSED DURING: 15 growth stages; CONTAINS InterPro DOMAIN/s: Transcription factor IIS, N-terminal (InterPro:IPR017923), Transcription elongation factor, TFIIS/elongin A/CRSP70, N-terminal (InterP…	PF08711	PTHR15141,PTHR15141:SF40	-	-	-	GO:0006351,GO:0005634,GO:0003677
30	284286	1.86e-11	Na23	Potri.T026800	292425	295283	+	5'	8139	30_284286	10.7305	PASS	Potri.T026800	PF13855,PF00931	PTHR23155,PTHR23155:SF497	KOG4658	-	K13459	GO:0005515,GO:0043531	-	AT4G10780	-	LRR and NB-ARC domains-containing disease resistance protein	LRR and NB-ARC domains-containing disease resistance protein	-	LRR and NB-ARC domains-containing disease resistance protein; FUNCTIONS IN: nucleoside-triphosphatase activity, nucleotide binding, ATP binding; INVOLVED IN: N-terminal protein myristoylation, defense response, apoptosis; CONTAINS InterPro DOMAIN/s: ATPase, AAA+ type, core (InterPro:IPR003593), NB-ARC (InterPro:IPR002182), Disease resistance protein (InterPro:IPR000767); BEST Arabidopsis thaliana…	PF13855,PF00931	PTHR23155,PTHR23155:SF639	-	-	-	GO:0005515,GO:0043531
17	2300232	3.24e-11	Na23	Potri.017G024900	2290271	2296597	+	3'	3635	17_2300232	10.4895	PASS	Potri.017G024900	-	-	-	-	-	-	-	-	-	-	-	-	-	-	-	-	-	-	-
17	2300232	3.24e-11	Na23	Potri.017G025000	2297910	2299534	+	3'	698	17_2300232	10.4895	PASS	Potri.017G025000	PF03140	PTHR31170	-	-	-	-	-	AT2G28580	-	Plant protein of unknown function (DUF247)	Plant protein of unknown function (DUF247)	-	Plant protein of unknown function (DUF247); CONTAINS InterPro DOMAIN/s: Protein of unknown function DUF247, plant (InterPro:IPR004158); BEST Arabidopsis thaliana protein match is: Plant protein of unknown function (DUF247) (TAIR:AT2G44930.1); Has 1063 Blast hits to 972 proteins in 18 species: Archae - 0; Bacteria - 0; Metazoa - 0; Fungi - 0; Plants - 1063; Viruses - 0; Other Eukaryotes - 0 (sourc…	PF03140	PTHR31170	-	-	-	-
17	2300232	3.24e-11	Na23	Potri.017G025100	2309796	2311312	+	5'	9564	17_2300232	10.4895	PASS	Potri.017G025100	PF03140	PTHR31170	-	-	-	-	-	AT3G60470	-	Plant protein of unknown function (DUF247)	Plant protein of unknown function (DUF247)	-	Plant protein of unknown function (DUF247); CONTAINS InterPro DOMAIN/s: Protein of unknown function DUF247, plant (InterPro:IPR004158); BEST Arabidopsis thaliana protein match is: Plant protein of unknown function (DUF247) (TAIR:AT2G28580.1); Has 1401 Blast hits to 907 proteins in 17 species: Archae - 0; Bacteria - 0; Metazoa - 0; Fungi - 0; Plants - 1401; Viruses - 0; Other Eukaryotes - 0 (sourc…	PF03140	PTHR31170	-	-	-	-
2	24418204	7.2e-11	Al27	Potri.002G254700	24408829	24416001	+	3'	2203	2_24418204	10.1427	PASS	Potri.002G254700	PF00400	PTHR22874,PTHR22874:SF4	KOG0266	-	K17985	GO:0005515	-	AT1G04140	-	Transducin family protein / WD-40 repeat family protein	Transducin family protein / WD-40 repeat family protein	-	Transducin family protein / WD-40 repeat family protein; FUNCTIONS IN: nucleotide binding; INVOLVED IN: biological_process unknown; LOCATED IN: chloroplast; EXPRESSED IN: 24 plant structures; EXPRESSED DURING: 15 growth stages; CONTAINS InterPro DOMAIN/s: WD40 repeat 2 (InterPro:IPR019782), WD40 repeat-like-containing domain (InterPro:IPR011046), WD40 repeat, conserved site (InterPro:IPR019775), …	PF00400	PTHR22874,PTHR22874:SF4	KOG0266	-	K17985	GO:0005515
2	24418204	7.2e-11	Al27	Potri.002G254800	24422750	24424108	-	5'	4546	2_24418204	10.1427	PASS	Potri.002G254800	PF05899	PTHR33271,PTHR33271:SF3	-	-	-	-	-	AT3G04300	-	RmlC-like cupins superfamily protein	RmlC-like cupins superfamily protein	-	RmlC-like cupins superfamily protein; CONTAINS InterPro DOMAIN/s: Cupin, RmlC-type (InterPro:IPR011051), Protein of unknown function DUF861, cupin-3 (InterPro:IPR008579), RmlC-like jelly roll fold (InterPro:IPR014710); BEST Arabidopsis thaliana protein match is: RmlC-like cupins superfamily protein (TAIR:AT4G10300.1); Has 512 Blast hits to 512 proteins in 136 species: Archae - 0; Bacteria - 273; …	PF05899	PTHR33271,PTHR33271:SF3	-	-	-	-
10	5276850	1.51e-10	Ni60	Potri.010G032900	5281159	5284809	-	5'	4309	10_5276850	9.82102	PASS	Potri.010G032900	PF04117	PTHR11266,PTHR11266:SF37	-	-	K13348	GO:0016021	-	AT2G42770	-	Peroxisomal membrane 22 kDa (Mpv17/PMP22) family protein	Peroxisomal membrane 22 kDa (Mpv17/PMP22) family protein	-	Peroxisomal membrane 22 kDa (Mpv17/PMP22) family protein; FUNCTIONS IN: molecular_function unknown; INVOLVED IN: biological_process unknown; LOCATED IN: peroxisomal membrane, chloroplast, chloroplast envelope; EXPRESSED IN: 23 plant structures; EXPRESSED DURING: 13 growth stages; CONTAINS InterPro DOMAIN/s: Mpv17/PMP22 (InterPro:IPR007248); BEST Arabidopsis thaliana protein match is: Peroxisomal …	PF04117	PTHR11266,PTHR11266:SF37	KOG1944	-	K13348	GO:0016021
10	5276850	1.51e-10	Ni60	Potri.010G033000	5284854	5288008	+	5'	8004	10_5276850	9.82102	PASS	Potri.010G033000	PF00782	PTHR10159	KOG1718	3.1.3.16,3.1.3.48	-	GO:0008138,GO:0006470	-	AT3G23610	DSPTP1	dual specificity protein phosphatase 1	dual specificity protein phosphatase 1	Encodes a dual specificity protein phosphatase whose activity is modulated by CaM binding.	dual specificity protein phosphatase 1 (DSPTP1); CONTAINS InterPro DOMAIN/s: Dual-specific/protein-tyrosine phosphatase, conserved region (InterPro:IPR000387), Dual specificity phosphatase (InterPro:IPR020417), Dual specificity phosphatase, catalytic domain (InterPro:IPR000340), Dual specificity phosphatase, subgroup, catalytic domain (InterPro:IPR020422); BEST Arabidopsis thaliana protein match …	PF00782	PTHR10159	KOG1718	3.1.3.16,3.1.3.48	K05766	GO:0008138,GO:0006470
4	17403228	2.07e-10	Cu65	Potri.004G152000	17394422	17397013	-	3'	6215	4_17403228	9.68403	PASS	Potri.004G152000	PF13041,PF01535	PTHR24015,PTHR24015:SF714	-	-	-	-	-	AT3G18840	-	Tetratricopeptide repeat (TPR)-like superfamily protein	Tetratricopeptide repeat (TPR)-like superfamily protein	-	Tetratricopeptide repeat (TPR)-like superfamily protein; CONTAINS InterPro DOMAIN/s: Pentatricopeptide repeat (InterPro:IPR002885); BEST Arabidopsis thaliana protein match is: Pentatricopeptide repeat (PPR) superfamily protein (TAIR:AT2G13600.1); Has 42936 Blast hits to 13106 proteins in 190 species: Archae - 0; Bacteria - 3; Metazoa - 51; Fungi - 30; Plants - 42456; Viruses - 0; Other Eukaryotes…	PF13041,PF01535	PTHR24015,PTHR24015:SF714	-	-	-	-
4	17403228	2.07e-10	Cu65	Potri.004G152100	17397729	17401939	-	3'	1289	4_17403228	9.68403	PASS	Potri.004G152100	PF00294	PTHR10584,PTHR10584:SF188	KOG2855	-	-	-	-	AT1G49350	-	pfkB-like carbohydrate kinase family protein	pfkB-like carbohydrate kinase family protein	-	pfkB-like carbohydrate kinase family protein; FUNCTIONS IN: kinase activity, ribokinase activity; INVOLVED IN: D-ribose metabolic process; LOCATED IN: cellular_component unknown; EXPRESSED IN: 22 plant structures; EXPRESSED DURING: 13 growth stages; CONTAINS InterPro DOMAIN/s: Carbohydrate/purine kinase (InterPro:IPR011611), Ribokinase (InterPro:IPR002139), Carbohydrate/puine kinase, PfkB, conser…	PF00294	PTHR10584,PTHR10584:SF188	KOG2855	2.7.1.83	-	-
4	17403228	2.07e-10	Cu65	Potri.004G152200	17408424	17408594	+	5'	5196	4_17403228	9.68403	PASS
16	3719292	3.16e-10	Se82	Potri.016G056200	3700237	3713151	+	3'	6141	16_3719292	9.50031	PASS	Potri.016G056200	PF02209,PF00626	PTHR11977,PTHR11977:SF46	-	-	-	GO:0007010,GO:0003779	-	AT2G41740	ATVLN2	villin 2	villin 2	Encodes a protein with high homology to animal villin.	villin 2 (VLN2); FUNCTIONS IN: actin binding, protein binding; INVOLVED IN: cytoskeleton organization; LOCATED IN: cellular_component unknown; EXPRESSED IN: 24 plant structures; EXPRESSED DURING: 15 growth stages; CONTAINS InterPro DOMAIN/s: Gelsolin (InterPro:IPR007122), Villin headpiece (InterPro:IPR003128), Gelsolin domain (InterPro:IPR007123); BEST Arabidopsis thaliana protein match is: villi…	PF02209,PF00626	PTHR11977,PTHR11977:SF46	-	-	-	GO:0007010,GO:0003779
16	3719292	3.16e-10	Se82	Potri.016G056300	3722045	3723848	-	5'	2753	16_3719292	9.50031	PASS	Potri.016G056300	-	PTHR34960,PTHR34960:SF1	-	-	-	-	-	AT3G57400	-	-	-	-	unknown protein; FUNCTIONS IN: molecular_function unknown; INVOLVED IN: N-terminal protein myristoylation; LOCATED IN: cellular_component unknown; BEST Arabidopsis thaliana protein match is: unknown protein (TAIR:AT5G52500.1); Has 38 Blast hits to 38 proteins in 7 species: Archae - 0; Bacteria - 0; Metazoa - 0; Fungi - 0; Plants - 38; Viruses - 0; Other Eukaryotes - 0 (source: NCBI BLink).	-	PTHR34960,PTHR34960:SF1	-	-	-	-
14	3877611	3.16e-10	Se82	Potri.014G048600	3867767	3868961	-	3'	8650	14_3877611	9.50031	PASS	Potri.014G048600	-	-	-	-	-	-	-	-	-	-	-	-	-	-	-	-	-	-	-
1	13805	3.25e-10	Na23	Potri.001G000200	2906	6646	-	3'	7159	1_13805	9.48812	PASS	Potri.001G000200	PF14111	PTHR31286,PTHR31286:SF2	-	3.5.1.28,3.2.1.96	-	-	-	AT2G01050	-	zinc ion binding;nucleic acid binding	zinc ion binding;nucleic acid binding	-	zinc ion binding;nucleic acid binding; FUNCTIONS IN: zinc ion binding, nucleic acid binding; INVOLVED IN: biological_process unknown; LOCATED IN: cellular_component unknown; CONTAINS InterPro DOMAIN/s: Zinc finger, CCHC-type (InterPro:IPR001878); BEST Arabidopsis thaliana protein match is: unknown protein (TAIR:AT3G31430.1); Has 369 Blast hits to 365 proteins in 15 species: Archae - 0; Bacteria -…	PF14392,PF14111	PTHR31286,PTHR31286:SF7	-	-	-	-
1	13805	3.25e-10	Na23	Potri.001G000400	8391	12483	-	3'	1322	1_13805	9.48812	PASS	Potri.001G000400	PF11779	PTHR33727	-	-	-	-	-	AT2G30942	-	Protein of unknown function (DUF3317)	Protein of unknown function (DUF3317)	-	Protein of unknown function (DUF3317); BEST Arabidopsis thaliana protein match is: Protein of unknown function (DUF3317) (TAIR:AT1G06515.2); Has 35333 Blast hits to 34131 proteins in 2444 species: Archae - 798; Bacteria - 22429; Metazoa - 974; Fungi - 991; Plants - 531; Viruses - 0; Other Eukaryotes - 9610 (source: NCBI BLink).	PF11779	PTHR33727	-	-	-	-
1	13805	3.25e-10	Na23	Potri.001G000300	8391	8860	+	3'	4945	1_13805	9.48812	PASS	Potri.001G000300	-	-	-	-	-	-	-	-	-	-	-	-	-	-	-	-	-	-	-
1	47401202	4.26e-10	Na23	Potri.001G442700	47398825	47400525	+	3'	677	1_47401202	9.37059	PASS	Potri.001G442700	PF01055	PTHR22762,PTHR22762:SF82	-	3.2.1.20	-	GO:0005975,GO:0004553	-	AT5G11720	-	Glycosyl hydrolases family 31 protein	Glycosyl hydrolases family 31 protein	-	Glycosyl hydrolases family 31 protein; FUNCTIONS IN: hydrolase activity, hydrolyzing O-glycosyl compounds; INVOLVED IN: carbohydrate metabolic process; LOCATED IN: apoplast, vacuole, plant-type cell wall; EXPRESSED IN: 23 plant structures; EXPRESSED DURING: 13 growth stages; CONTAINS InterPro DOMAIN/s: Glycoside hydrolase, family 31 (InterPro:IPR000322), Glycoside hydrolase, catalytic core (Inter…	PF13802,PF16863,PF01055	PTHR22762,PTHR22762:SF82	-	3.2.1.20	K01187	GO:0005975,GO:0004553
1	47401202	4.26e-10	Na23	Potri.001G442800	47402305	47406214	+	5'	1103	1_47401202	9.37059	PASS	Potri.001G442800	PF13802,PF16863,PF01055	PTHR22762,PTHR22762:SF82	-	3.2.1.20	K01187	GO:0005975,GO:0004553	-	AT5G11720	-	Glycosyl hydrolases family 31 protein	Glycosyl hydrolases family 31 protein	-	Glycosyl hydrolases family 31 protein; FUNCTIONS IN: hydrolase activity, hydrolyzing O-glycosyl compounds; INVOLVED IN: carbohydrate metabolic process; LOCATED IN: apoplast, vacuole, plant-type cell wall; EXPRESSED IN: 23 plant structures; EXPRESSED DURING: 13 growth stages; CONTAINS InterPro DOMAIN/s: Glycoside hydrolase, family 31 (InterPro:IPR000322), Glycoside hydrolase, catalytic core (Inter…	PF13802,PF16863,PF01055	PTHR22762,PTHR22762:SF82	-	3.2.1.20	K01187	GO:0005975,GO:0004553
1	47401202	4.26e-10	Na23	Potri.001G442900	47406392	47415934	-	5'	5190	1_47401202	9.37059	PASS	Potri.001G442900	PF07928	PTHR12965,PTHR12965:SF0	-	-	K17600	GO:0042147	-	AT4G19490	ATVPS54	VPS54	VPS54	Putative homolog of yeast Vps54. Thought to associate with POK and ATVPS53 in a plant GARP-like complex involved in the membrane trafficking system.	VPS54; INVOLVED IN: retrograde transport, endosome to Golgi; LOCATED IN: chloroplast; EXPRESSED IN: male gametophyte; EXPRESSED DURING: L mature pollen stage; CONTAINS InterPro DOMAIN/s: Vacuolar protein sorting-associated protein 54 (InterPro:IPR019515), Vps54-like (InterPro:IPR012501); Has 471 Blast hits to 377 proteins in 168 species: Archae - 2; Bacteria - 4; Metazoa - 149; Fungi - 188; Plant…	PF10475,PF07928	PTHR12965,PTHR12965:SF0	-	-	K17600	GO:0042147
4	17405179	4.51e-10	Cu65	Potri.004G152000	17394422	17397013	-	3'	8166	4_17405179	9.34582	PASS	Potri.004G152000	PF13041,PF01535	PTHR24015,PTHR24015:SF714	-	-	-	-	-	AT3G18840	-	Tetratricopeptide repeat (TPR)-like superfamily protein	Tetratricopeptide repeat (TPR)-like superfamily protein	-	Tetratricopeptide repeat (TPR)-like superfamily protein; CONTAINS InterPro DOMAIN/s: Pentatricopeptide repeat (InterPro:IPR002885); BEST Arabidopsis thaliana protein match is: Pentatricopeptide repeat (PPR) superfamily protein (TAIR:AT2G13600.1); Has 42936 Blast hits to 13106 proteins in 190 species: Archae - 0; Bacteria - 3; Metazoa - 51; Fungi - 30; Plants - 42456; Viruses - 0; Other Eukaryotes…	PF13041,PF01535	PTHR24015,PTHR24015:SF714	-	-	-	-
4	17405179	4.51e-10	Cu65	Potri.004G152100	17397729	17401939	-	3'	3240	4_17405179	9.34582	PASS	Potri.004G152100	PF00294	PTHR10584,PTHR10584:SF188	KOG2855	-	-	-	-	AT1G49350	-	pfkB-like carbohydrate kinase family protein	pfkB-like carbohydrate kinase family protein	-	pfkB-like carbohydrate kinase family protein; FUNCTIONS IN: kinase activity, ribokinase activity; INVOLVED IN: D-ribose metabolic process; LOCATED IN: cellular_component unknown; EXPRESSED IN: 22 plant structures; EXPRESSED DURING: 13 growth stages; CONTAINS InterPro DOMAIN/s: Carbohydrate/purine kinase (InterPro:IPR011611), Ribokinase (InterPro:IPR002139), Carbohydrate/puine kinase, PfkB, conser…	PF00294	PTHR10584,PTHR10584:SF188	KOG2855	2.7.1.83	-	-
4	17405179	4.51e-10	Cu65	Potri.004G152200	17408424	17408594	+	5'	3245	4_17405179	9.34582	PASS
2	4838300	5.62e-10	Na23	Potri.002G070200	4826319	4828590	-	3'	9710	2_4838300	9.25026	PASS	Potri.002G070200	PF00076	PTHR10501,PTHR10501:SF20	KOG0114	-	-	GO:0003676,GO:0017069,GO:0000398	-	AT1G76940	-	RNA-binding (RRM/RBD/RNP motifs) family protein	RNA-binding (RRM/RBD/RNP motifs) family protein	-	RNA-binding (RRM/RBD/RNP motifs) family protein; FUNCTIONS IN: nucleotide binding, nucleic acid binding; INVOLVED IN: biological_process unknown; EXPRESSED IN: 23 plant structures; EXPRESSED DURING: 15 growth stages; CONTAINS InterPro DOMAIN/s: RNA recognition motif, RNP-1 (InterPro:IPR000504), Nucleotide-binding, alpha-beta plait (InterPro:IPR012677); BEST Arabidopsis thaliana protein match is: …	PF00076	PTHR10501,PTHR10501:SF20	-	-	-	GO:0003676,GO:0017069,GO:0000398
2	4838300	5.62e-10	Na23	Potri.002G070300	4845050	4852087	+	5'	6750	2_4838300	9.25026	PASS	Potri.002G070300	PF16457,PF01363,PF13713,PF08381,PF00415	PTHR22870,PTHR22870:SF91	KOG1427	-	-	GO:0046872	-	AT5G42140	-	Regulator of chromosome condensation (RCC1) family with FYVE zinc finger domain	Regulator of chromosome condensation (RCC1) family with FYVE zinc finger domain	-	Regulator of chromosome condensation (RCC1) family with FYVE zinc finger domain; CONTAINS InterPro DOMAIN/s: Regulator of chromosome condensation, RCC1 (InterPro:IPR000408), Disease resistance/zinc finger/chromosome condensation-like region (InterPro:IPR013591), Zinc finger, FYVE-type (InterPro:IPR000306), Regulator of chromosome condensation/beta-lactamase-inhibitor protein II (InterPro:IPR00909…	PF16457,PF13713,PF01363,PF08381,PF00415	PTHR22870,PTHR22870:SF91	KOG1427	-	-	GO:0046872
4	17403214	6.3e-10	Cu65	Potri.004G152000	17394422	17397013	-	3'	6201	4_17403214	9.20066	PASS	Potri.004G152000	PF13041,PF01535	PTHR24015,PTHR24015:SF714	-	-	-	-	-	AT3G18840	-	Tetratricopeptide repeat (TPR)-like superfamily protein	Tetratricopeptide repeat (TPR)-like superfamily protein	-	Tetratricopeptide repeat (TPR)-like superfamily protein; CONTAINS InterPro DOMAIN/s: Pentatricopeptide repeat (InterPro:IPR002885); BEST Arabidopsis thaliana protein match is: Pentatricopeptide repeat (PPR) superfamily protein (TAIR:AT2G13600.1); Has 42936 Blast hits to 13106 proteins in 190 species: Archae - 0; Bacteria - 3; Metazoa - 51; Fungi - 30; Plants - 42456; Viruses - 0; Other Eukaryotes…	PF13041,PF01535	PTHR24015,PTHR24015:SF714	-	-	-	-
4	17403214	6.3e-10	Cu65	Potri.004G152100	17397729	17401939	-	3'	1275	4_17403214	9.20066	PASS	Potri.004G152100	PF00294	PTHR10584,PTHR10584:SF188	KOG2855	-	-	-	-	AT1G49350	-	pfkB-like carbohydrate kinase family protein	pfkB-like carbohydrate kinase family protein	-	pfkB-like carbohydrate kinase family protein; FUNCTIONS IN: kinase activity, ribokinase activity; INVOLVED IN: D-ribose metabolic process; LOCATED IN: cellular_component unknown; EXPRESSED IN: 22 plant structures; EXPRESSED DURING: 13 growth stages; CONTAINS InterPro DOMAIN/s: Carbohydrate/purine kinase (InterPro:IPR011611), Ribokinase (InterPro:IPR002139), Carbohydrate/puine kinase, PfkB, conser…	PF00294	PTHR10584,PTHR10584:SF188	KOG2855	2.7.1.83	-	-
4	17403214	6.3e-10	Cu65	Potri.004G152200	17408424	17408594	+	5'	5210	4_17403214	9.20066	PASS
17	13679980	9.03e-10	Cu65	Potri.017G124500	13655730	13671566	-	3'	8414	17_13679980	9.04431	PASS	Potri.017G124500	PF10458,PF08264,PF00133	PTHR11946,PTHR11946:SF76	-	6.1.1.9	K01873	GO:0006438,GO:0005737,GO:0005524,GO:0004832,GO:0000166,GO:0006418,GO:0004812	-	AT5G16715	EMB2247	ATP binding;valine-tRNA ligases;aminoacyl-tRNA ligases;nucleotide binding;ATP binding;aminoacyl-tRNA ligases	ATP binding;valine-tRNA ligases;aminoacyl-tRNA ligases;nucleotide binding;ATP binding;aminoacyl-tRNA ligases	-	embryo defective 2247 (EMB2247); FUNCTIONS IN: valine-tRNA ligase activity, nucleotide binding, aminoacyl-tRNA ligase activity, ATP binding; INVOLVED IN: tRNA aminoacylation for protein translation, embryo development ending in seed dormancy; LOCATED IN: chloroplast stroma, chloroplast; EXPRESSED IN: 19 plant structures; EXPRESSED DURING: 13 growth stages; CONTAINS InterPro DOMAIN/s: tRNA-binding…	PF10458,PF08264,PF00133	PTHR11946,PTHR11946:SF76	-	6.1.1.9	K01873	GO:0006438,GO:0005737,GO:0005524,GO:0004832,GO:0000166,GO:0006418,GO:0004812
17	13679980	9.03e-10	Cu65	Potri.017G124600	13671989	13672852	+	3'	7128	17_13679980	9.04431	PASS	Potri.017G124600	PF00348	PTHR12001,PTHR12001:SF52	KOG0776	2.5.1.29	-	GO:0008299	-	AT4G36810	GGPS1	geranylgeranyl pyrophosphate synthase 1	geranylgeranyl pyrophosphate synthase 1	Encodes a protein with geranylgeranyl pyrophosphate synthase activity involved in isoprenoid biosynthesis. The enzyme appears to be targeted to the chloroplast in epidermal cells and guard cells of leaves, and in etioplasts in roots.	geranylgeranyl pyrophosphate synthase 1 (GGPS1); FUNCTIONS IN: farnesyltranstransferase activity; INVOLVED IN: isoprenoid biosynthetic process; LOCATED IN: etioplast, chloroplast; EXPRESSED IN: 23 plant structures; EXPRESSED DURING: 13 growth stages; CONTAINS InterPro DOMAIN/s: Polyprenyl synthetase-related (InterPro:IPR017446), Terpenoid synthase (InterPro:IPR008949), Polyprenyl synthetase (Inte…	PF00348	PTHR12001,PTHR12001:SF52	KOG0776	2.5.1.29,2.5.1.10,2.5.1.1	K13789	GO:0008299
17	13679980	9.03e-10	Cu65	Potri.017G124700	13674002	13674946	+	3'	5034	17_13679980	9.04431	PASS	Potri.017G124700	PF00348	PTHR12001,PTHR12001:SF52	KOG0776	2.5.1.29	K13789	GO:0008299	-	AT4G36810	GGPS1	geranylgeranyl pyrophosphate synthase 1	geranylgeranyl pyrophosphate synthase 1	Encodes a protein with geranylgeranyl pyrophosphate synthase activity involved in isoprenoid biosynthesis. The enzyme appears to be targeted to the chloroplast in epidermal cells and guard cells of leaves, and in etioplasts in roots.	geranylgeranyl pyrophosphate synthase 1 (GGPS1); FUNCTIONS IN: farnesyltranstransferase activity; INVOLVED IN: isoprenoid biosynthetic process; LOCATED IN: etioplast, chloroplast; EXPRESSED IN: 23 plant structures; EXPRESSED DURING: 13 growth stages; CONTAINS InterPro DOMAIN/s: Polyprenyl synthetase-related (InterPro:IPR017446), Terpenoid synthase (InterPro:IPR008949), Polyprenyl synthetase (Inte…	PF00348	PTHR12001,PTHR12001:SF52	KOG0776	2.5.1.29,2.5.1.10,2.5.1.1	K13789	GO:0008299
17	13679980	9.03e-10	Cu65	Potri.017G124800	13674972	13679832	-	3'	148	17_13679980	9.04431	PASS	Potri.017G124800	PF00977	PTHR21235,PTHR21235:SF23	KOG3055	5.3.1.16	K01814	GO:0000105	-	AT2G36230	APG10	Aldolase-type TIM barrel family protein	Aldolase-type TIM barrel family protein	Encodes a BBMII isomerase involved in histidine biosynthesis.	ALBINO AND PALE GREEN 10 (APG10); FUNCTIONS IN: 1-(5-phosphoribosyl)-5-[(5-phosphoribosylamino)methylideneamino]imidazole-4-carboxamide isomerase activity; INVOLVED IN: histidine biosynthetic process; LOCATED IN: chloroplast; EXPRESSED IN: 21 plant structures; EXPRESSED DURING: 13 growth stages; CONTAINS InterPro DOMAIN/s: Aldolase-type TIM barrel (InterPro:IPR013785), Ribulose-phosphate binding …	PF00977	PTHR21235,PTHR21235:SF23	KOG3055	5.3.1.16	K01814	GO:0000105
17	13679980	9.03e-10	Cu65	Potri.017G124900	13682448	13683405	+	5'	2468	17_13679980	9.04431	PASS	Potri.017G124900	-	-	-	-	-	-	-	-	-	-	-	-	-	-	-	-	-	-	-
17	13679980	9.03e-10	Cu65	Potri.017G125000	13684067	13687920	-	5'	4087	17_13679980	9.04431	PASS	Potri.017G125000	PF09177	PTHR34949,PTHR34949:SF2	-	-	-	GO:0048193,GO:0016020	-	AT1G27700	-	Syntaxin/t-SNARE family protein	Syntaxin/t-SNARE family protein	-	Syntaxin/t-SNARE family protein; INVOLVED IN: Golgi vesicle transport, vesicle-mediated transport; LOCATED IN: nucleus; EXPRESSED IN: 24 plant structures; EXPRESSED DURING: 15 growth stages; CONTAINS InterPro DOMAIN/s: t-SNARE (InterPro:IPR010989), Syntaxin 6, N-terminal (InterPro:IPR015260); BEST Arabidopsis thaliana protein match is: Syntaxin/t-SNARE family protein (TAIR:AT4G30240.1); Has 134 B…	PF09177	PTHR19957,PTHR19957:SF118	-	-	-	GO:0048193,GO:0016020
17	13679980	9.03e-10	Cu65	Potri.017G125100	13689108	13694282	-	5'	9128	17_13679980	9.04431	PASS	Potri.017G125100	PF13410,PF13417	PTHR11260,PTHR11260:SF171	KOG1422	1.8.5.1	-	GO:0005515	-	AT5G16710	DHAR3	dehydroascorbate reductase 1	dehydroascorbate reductase 1	The protein undergoes thiolation following treatment with the oxidant tert-butylhydroperoxide.	dehydroascorbate reductase 1 (DHAR3); FUNCTIONS IN: glutathione dehydrogenase (ascorbate) activity; INVOLVED IN: protein amino acid glutathionylation; LOCATED IN: chloroplast stroma, chloroplast, chloroplast envelope; EXPRESSED IN: 23 plant structures; EXPRESSED DURING: 14 growth stages; CONTAINS InterPro DOMAIN/s: Thioredoxin fold (InterPro:IPR012335), Glutathione S-transferase, C-terminal-like …	PF13410,PF13417	PTHR11260,PTHR11260:SF171	KOG1422	2.5.1.18,1.8.5.1	-	GO:0005515
4	17402320	1.03e-09	Cu65	Potri.004G151900	17391460	17392494	+	3'	9826	4_17402320	8.98716	PASS	Potri.004G151900	-	-	-	-	-	-	-	AT4G36730	GBF1	G-box binding factor 1	G-box binding factor 1	member of a gene family encoding basic leucine zipper proteins (GBFs) which bind the G-box	G-box binding factor 1 (GBF1); CONTAINS InterPro DOMAIN/s: Basic-leucine zipper (bZIP) transcription factor (InterPro:IPR004827), G-box binding, MFMR (InterPro:IPR012900), bZIP transcription factor, bZIP-1 (InterPro:IPR011616); BEST Arabidopsis thaliana protein match is: basic region/leucine zipper transcription factor 16 (TAIR:AT2G35530.1); Has 3891 Blast hits to 3827 proteins in 347 species: Ar…	PF00170,PF07777	PTHR22952,PTHR22952:SF123	KOG3119	-	K09060	GO:0043565,GO:0006355,GO:0003700
4	17402320	1.03e-09	Cu65	Potri.004G152000	17394422	17397013	-	3'	5307	4_17402320	8.98716	PASS	Potri.004G152000	PF13041,PF01535	PTHR24015,PTHR24015:SF714	-	-	-	-	-	AT3G18840	-	Tetratricopeptide repeat (TPR)-like superfamily protein	Tetratricopeptide repeat (TPR)-like superfamily protein	-	Tetratricopeptide repeat (TPR)-like superfamily protein; CONTAINS InterPro DOMAIN/s: Pentatricopeptide repeat (InterPro:IPR002885); BEST Arabidopsis thaliana protein match is: Pentatricopeptide repeat (PPR) superfamily protein (TAIR:AT2G13600.1); Has 42936 Blast hits to 13106 proteins in 190 species: Archae - 0; Bacteria - 3; Metazoa - 51; Fungi - 30; Plants - 42456; Viruses - 0; Other Eukaryotes…	PF13041,PF01535	PTHR24015,PTHR24015:SF714	-	-	-	-
4	17402320	1.03e-09	Cu65	Potri.004G152100	17397729	17401939	-	3'	381	4_17402320	8.98716	PASS	Potri.004G152100	PF00294	PTHR10584,PTHR10584:SF188	KOG2855	-	-	-	-	AT1G49350	-	pfkB-like carbohydrate kinase family protein	pfkB-like carbohydrate kinase family protein	-	pfkB-like carbohydrate kinase family protein; FUNCTIONS IN: kinase activity, ribokinase activity; INVOLVED IN: D-ribose metabolic process; LOCATED IN: cellular_component unknown; EXPRESSED IN: 22 plant structures; EXPRESSED DURING: 13 growth stages; CONTAINS InterPro DOMAIN/s: Carbohydrate/purine kinase (InterPro:IPR011611), Ribokinase (InterPro:IPR002139), Carbohydrate/puine kinase, PfkB, conser…	PF00294	PTHR10584,PTHR10584:SF188	KOG2855	2.7.1.83	-	-
4	17402320	1.03e-09	Cu65	Potri.004G152200	17408424	17408594	+	5'	6104	4_17402320	8.98716	PASS
11	15102817	1.15e-09	Cu65	Potri.011G125800	15092409	15103262	+	in gene	0	11_15102817	8.9393	PASS	Potri.011G125800	PF02148,PF00627,PF00443	PTHR24006,PTHR24006:SF449	-	3.4.19.12	K11836	GO:0008270,GO:0036459,GO:0016579	-	AT3G20630	ATUBP14	ubiquitin-specific protease 14	ubiquitin-specific protease 14	Encodes a ubiquitin-specific protease. Identical to TTN6. Loss of function mutations are embryo lethals, having development arrested at the preglobular/globular stage. Also involved in root responses to phosphate deficiency.	ubiquitin-specific protease 14 (UBP14); CONTAINS InterPro DOMAIN/s: Zinc finger, UBP-type (InterPro:IPR001607), Ubiquitin-associated/translation elongation factor EF1B, N-terminal, eukaryote (InterPro:IPR015940), Ubiquitin-associated/translation elongation factor EF1B, N-terminal (InterPro:IPR000449), Peptidase C19, ubiquitin carboxyl-terminal hydrolase 2, conserved site (InterPro:IPR018200), Pep…	PF13423,PF02148,PF00627	PTHR24006,PTHR24006:SF22	-	3.4.19.12	K11836	GO:0008270
11	15102817	1.15e-09	Cu65	Potri.011G125900	15108801	15110515	-	5'	5984	11_15102817	8.9393	PASS	Potri.011G125900	PF00249	PTHR10641,PTHR10641:SF586	KOG0048	-	K09422	-	MYB	AT4G21440	ATM4	MYB-like 102	MYB-like 102	Encodes a MYB transcription factor involved in wounding and osmotic stress response. Member of the R2R3 factor gene family.	MYB-like 102 (MYB102); CONTAINS InterPro DOMAIN/s: SANT, DNA-binding (InterPro:IPR001005), Homeodomain-like (InterPro:IPR009057), Myb, DNA-binding (InterPro:IPR014778), HTH transcriptional regulator, Myb-type, DNA-binding (InterPro:IPR017930), Homeodomain-related (InterPro:IPR012287), Myb transcription factor (InterPro:IPR015495); BEST Arabidopsis thaliana protein match is: myb domain protein 74 …	PF00249	PTHR10641,PTHR10641:SF606	KOG0048	-	K09422	-
9	9153935	1.22e-09	Al27	Potri.009G104300	9146671	9148329	+	3'	5606	9_9153935	8.91364	PASS	Potri.009G104300	PF00135	PTHR23024,PTHR23024:SF157	KOG1515	3.1.1.1	-	-	-	AT3G48700	ATCXE13	carboxyesterase 13	carboxyesterase 13	-	carboxyesterase 13 (CXE13); FUNCTIONS IN: hydrolase activity; INVOLVED IN: metabolic process; LOCATED IN: cellular_component unknown; EXPRESSED IN: 6 plant structures; EXPRESSED DURING: F mature embryo stage, petal differentiation and expansion stage, E expanded cotyledon stage, D bilateral stage; CONTAINS InterPro DOMAIN/s: Lipase, GDXG, active site (InterPro:IPR002168), Alpha/beta hydrolase fol…	PF00135	PTHR23024,PTHR23024:SF157	KOG1515	3.1.1.1	-	-
9	9153935	1.22e-09	Al27	Potri.009G104400	9149514	9151197	-	3'	2738	9_9153935	8.91364	PASS	Potri.009G104400	PF00135	PTHR23024,PTHR23024:SF196	KOG1515	3.1.1.1	-	-	-	AT2G03550	-	alpha/beta-Hydrolases superfamily protein	alpha/beta-Hydrolases superfamily protein	-	alpha/beta-Hydrolases superfamily protein; FUNCTIONS IN: hydrolase activity; INVOLVED IN: metabolic process; LOCATED IN: cellular_component unknown; EXPRESSED IN: 21 plant structures; EXPRESSED DURING: 13 growth stages; CONTAINS InterPro DOMAIN/s: Alpha/beta hydrolase fold-3 (InterPro:IPR013094); BEST Arabidopsis thaliana protein match is: carboxyesterase 13 (TAIR:AT3G48700.1); Has 9970 Blast hit…	PF00135	PTHR23024,PTHR23024:SF157	KOG1515	3.1.1.1	-	-
9	9153935	1.22e-09	Al27	Potri.009G104500	9154939	9155208	-	5'	1004	9_9153935	8.91364	PASS	Potri.009G104500	-	-	-	-	-	-	-	AT2G36295	-	-	-	-	unknown protein; Has 35333 Blast hits to 34131 proteins in 2444 species: Archae - 798; Bacteria - 22429; Metazoa - 974; Fungi - 991; Plants - 531; Viruses - 0; Other Eukaryotes - 9610 (source: NCBI BLink).	-	-	-	-	-	-
9	9153935	1.22e-09	Al27	Potri.009G104600	9157154	9158411	-	5'	3219	9_9153935	8.91364	PASS	Potri.009G104600	PF07859	PTHR23024,PTHR23024:SF228	KOG1515	4.2.1.105,3.1.1.1	-	GO:0016787,GO:0008152	-	AT1G19190	-	alpha/beta-Hydrolases superfamily protein	alpha/beta-Hydrolases superfamily protein	-	alpha/beta-Hydrolases superfamily protein; FUNCTIONS IN: hydrolase activity; INVOLVED IN: metabolic process; LOCATED IN: cellular_component unknown; EXPRESSED IN: inflorescence meristem, root, flower; EXPRESSED DURING: petal differentiation and expansion stage; CONTAINS InterPro DOMAIN/s: Lipase, GDXG, active site (InterPro:IPR002168), Alpha/beta hydrolase fold-3 (InterPro:IPR013094); BEST Arabid…	PF00135	PTHR23024,PTHR23024:SF186	KOG1515	3.1.1.1	-	-
9	9153935	1.22e-09	Al27	Potri.009G104700	9159317	9160301	-	5'	5382	9_9153935	8.91364	PASS	Potri.009G104700	PF12695	PTHR23024,PTHR23024:SF228	KOG1515	4.2.1.105,3.1.1.1	-	-	-	AT1G47480	-	alpha/beta-Hydrolases superfamily protein	alpha/beta-Hydrolases superfamily protein	-	alpha/beta-Hydrolases superfamily protein; FUNCTIONS IN: hydrolase activity; INVOLVED IN: metabolic process; LOCATED IN: cellular_component unknown; EXPRESSED IN: stem, hypocotyl, root, flower; EXPRESSED DURING: petal differentiation and expansion stage; CONTAINS InterPro DOMAIN/s: Lipase, GDXG, active site (InterPro:IPR002168), Alpha/beta hydrolase fold-3 (InterPro:IPR013094); BEST Arabidopsis t…	PF00135	PTHR23024,PTHR23024:SF131	KOG1515	3.1.1.1	-	-
9	9153935	1.22e-09	Al27	Potri.009G104800	9161993	9162367	-	5'	8058	9_9153935	8.91364	PASS	Potri.009G104800	PF05617	PTHR31207,PTHR31207:SF18	-	-	-	-	-	AT2G04037	-	Protein of unknown function (DUF784)	Protein of unknown function (DUF784)	-	Protein of unknown function (DUF784); FUNCTIONS IN: molecular_function unknown; INVOLVED IN: biological_process unknown; LOCATED IN: endomembrane system; CONTAINS InterPro DOMAIN/s: Protein of unknown function DUF784, Arabidopsis thaliana (InterPro:IPR008502); BEST Arabidopsis thaliana protein match is: Protein of unknown function (DUF784) (TAIR:AT2G04041.1); Has 30201 Blast hits to 17322 protein…	PF05617	PTHR31207,PTHR31207:SF19	-	-	-	-
10	1570940	1.28e-09	Al27	Potri.010G011800	1561903	1568722	-	3'	2218	10_1570940	8.89279	PASS	Potri.010G011800	PF14675,PF14679,PF14676,PF14680,PF14678	PTHR21818,PTHR21818:SF0	-	-	K10895	GO:0006281	-	AT5G49110	-	-	-	-	unknown protein; INVOLVED IN: biological_process unknown; LOCATED IN: cellular_component unknown; EXPRESSED IN: cultured cell; Has 30201 Blast hits to 17322 proteins in 780 species: Archae - 12; Bacteria - 1396; Metazoa - 17338; Fungi - 3422; Plants - 5037; Viruses - 0; Other Eukaryotes - 2996 (source: NCBI BLink).	PF14679,PF14675,PF14676,PF14680,PF14678	PTHR21818,PTHR21818:SF0	-	-	K10895	GO:0006281
5	25663599	1.4e-09	Al27	Potri.005G256700	25650286	25654849	-	3'	8750	5_25663599	8.85387	PASS	Potri.005G256700	PF00076	PTHR24012,PTHR24012:SF421	KOG0149	-	-	GO:0003676	-	AT1G76460	-	RNA-binding (RRM/RBD/RNP motifs) family protein	RNA-binding (RRM/RBD/RNP motifs) family protein	-	RNA-binding (RRM/RBD/RNP motifs) family protein; FUNCTIONS IN: RNA binding, nucleotide binding, nucleic acid binding; INVOLVED IN: biological_process unknown; LOCATED IN: cellular_component unknown; EXPRESSED IN: 23 plant structures; EXPRESSED DURING: 13 growth stages; CONTAINS InterPro DOMAIN/s: RNA recognition motif, RNP-1 (InterPro:IPR000504), Nucleotide-binding, alpha-beta plait (InterPro:IPR…	PF00076	PTHR24012,PTHR24012:SF421	KOG0149	-	-	GO:0003676
5	25663599	1.4e-09	Al27	Potri.005G256800	25656667	25657690	-	3'	5909	5_25663599	8.85387	PASS	Potri.005G256800	-	-	-	-	-	-	-	-	-	-	-	-	-	-	-	-	-	-	-
5	25663599	1.4e-09	Al27	Potri.005G256900	25659701	25661625	+	3'	1974	5_25663599	8.85387	PASS	Potri.005G256900	-	-	-	-	-	-	-	-	-	-	-	-	-	-	-	-	-	-	-
5	25663599	1.4e-09	Al27	Potri.005G257000	25669673	25672589	+	5'	6074	5_25663599	8.85387	PASS	Potri.005G257000	PF00368	PTHR10572,PTHR10572:SF9	-	1.1.1.34	K00021	GO:0055114,GO:0050662,GO:0015936,GO:0004420	-	AT1G76490	HMG1	hydroxy methylglutaryl CoA reductase 1	hydroxy methylglutaryl CoA reductase 1	Encodes a 3-hydroxy-3-methylglutaryl coenzyme A reductase, which is involved in melavonate biosynthesis and performs the first committed step in isoprenoid biosynthesis. Expression is activated in dark in leaf tissue but not controlled by light in the root (confine	hydroxy methylglutaryl CoA reductase 1 (HMG1); CONTAINS InterPro DOMAIN/s: Hydroxymethylglutaryl-CoA reductase, class I, catalytic (InterPro:IPR004554), Hydroxymethylglutaryl-CoA reductase, class I/II, substrate-binding (InterPro:IPR009029), Hydroxymethylglutaryl-CoA reductase, class I/II, NAD/NADP-binding (InterPro:IPR009023), Hydroxymethylglutaryl-CoA reductase, class I/II, catalytic (InterPro:…	PF00368	PTHR10572,PTHR10572:SF9	-	1.1.1.34	K00021	GO:0055114,GO:0050662,GO:0015936,GO:0004420
18	14277823	1.96e-09	Co59	Potri.018G118400	14268765	14268965	-	3'	8858	18_14277823	8.70774	PASS	Potri.018G118400	-	-	-	-	-	-	-	AT1G15740	-	Leucine-rich repeat family protein	Leucine-rich repeat family protein	-	Leucine-rich repeat family protein; BEST Arabidopsis thaliana protein match is: Leucine-rich repeat (LRR) family protein (TAIR:AT4G23840.1); Has 38052 Blast hits to 19856 proteins in 856 species: Archae - 6; Bacteria - 8624; Metazoa - 11681; Fungi - 680; Plants - 12072; Viruses - 79; Other Eukaryotes - 4910 (source: NCBI BLink).	PF13855	PTHR24006,PTHR24006:SF451	-	-	-	GO:0005515
18	14277823	1.96e-09	Co59	Potri.018G118500	14275754	14277330	-	3'	493	18_14277823	8.70774	PASS	Potri.018G118500	PF12796	PTHR24161,PTHR24161:SF22	KOG4214	2.3.1.225	-	-	-	AT5G20350	TIP1	Ankyrin repeat family protein with DHHC zinc finger domain	Ankyrin repeat family protein with DHHC zinc finger domain	Encodes a protein containing ankyrin and DHHC-CRD domain. Acts to restrict the size of the swelling that forms at the beginning of root hair cell growth, possibly by a mechanism that requires RHD1. Mutant displays defects in both root hair and pollen tube growth.	TIP GROWTH DEFECTIVE 1 (TIP1); FUNCTIONS IN: acyl binding, S-acyltransferase activity; INVOLVED IN: response to salt stress, cell tip growth; EXPRESSED IN: 28 plant structures; EXPRESSED DURING: 15 growth stages; CONTAINS InterPro DOMAIN/s: Zinc finger, DHHC-type (InterPro:IPR001594), Ankyrin repeat-containing domain (InterPro:IPR020683), Ankyrin repeat (InterPro:IPR002110); BEST Arabidopsis thal…	PF12796,PF01529	PTHR24161,PTHR24161:SF22	-	2.3.1.225	K18932	GO:0008270
18	14277823	1.96e-09	Co59	Potri.018G118600	14287532	14288134	+	5'	9709	18_14277823	8.70774	PASS	Potri.018G118600	PF03171	PTHR10209,PTHR10209:SF107	-	1.14.11.32	-	GO:0055114,GO:0016491	-	AT1G49390	-	2-oxoglutarate (2OG) and Fe(II)-dependent oxygenase superfamily protein	2-oxoglutarate (2OG) and Fe(II)-dependent oxygenase superfamily protein	-	2-oxoglutarate (2OG) and Fe(II)-dependent oxygenase superfamily protein; FUNCTIONS IN: oxidoreductase activity, acting on paired donors, with incorporation or reduction of molecular oxygen, 2-oxoglutarate as one donor, and incorporation of one atom each of oxygen into both donors, oxidoreductase activity; INVOLVED IN: flavonoid biosynthetic process; LOCATED IN: cellular_component unknown; EXPRESS…	PF03171,PF14226	PTHR10209,PTHR10209:SF107	KOG0143	1.14.11.32	-	GO:0055114,GO:0016491
7	4594775	2.04e-09	Al27	Potri.007G048800	4586541	4589977	-	3'	4798	7_4594775	8.69037	PASS	Potri.007G048800	PF00560,PF08263,PF07714	PTHR27008,PTHR27008:SF35	KOG1187	2.7.11.1	-	GO:0005515,GO:0006468,GO:0004672	-	AT4G37250	-	Leucine-rich repeat protein kinase family protein	Leucine-rich repeat protein kinase family protein	-	Leucine-rich repeat protein kinase family protein; FUNCTIONS IN: protein serine/threonine kinase activity, kinase activity, ATP binding; INVOLVED IN: transmembrane receptor protein tyrosine kinase signaling pathway, protein amino acid phosphorylation; LOCATED IN: endomembrane system; EXPRESSED IN: 22 plant structures; EXPRESSED DURING: 13 growth stages; CONTAINS InterPro DOMAIN/s: Protein kinase,…	PF00560,PF08263,PF00069	PTHR27008,PTHR27008:SF35	KOG1187	2.7.11.1	-	GO:0005515,GO:0006468,GO:0005524,GO:0004672
13	2820280	2.09e-09	Al27	Potri.013G040300	2800317	2810665	-	3'	9615	13_2820280	8.67985	PASS	Potri.013G040300	PF13499	PTHR23050,PTHR23050:SF177	KOG0027	-	-	-	-	AT3G22930	CML11	calmodulin-like 11	calmodulin-like 11	Encodes a calmodulin-like protein.	calmodulin-like 11 (CML11); FUNCTIONS IN: calcium ion binding; INVOLVED IN: biological_process unknown; EXPRESSED IN: 7 plant structures; EXPRESSED DURING: LP.06 six leaves visible, LP.04 four leaves visible, LP.10 ten leaves visible, LP.08 eight leaves visible, LP.12 twelve leaves visible; CONTAINS InterPro DOMAIN/s: EF-Hand 1, calcium-binding site (InterPro:IPR018247), EF-HAND 2 (InterPro:IPR01…	PF13499	PTHR23050	KOG0027	-	K13448	-
13	2820280	2.09e-09	Al27	Potri.013G040400	2813704	2815466	+	3'	4814	13_2820280	8.67985	PASS	Potri.013G040400	PF00909	PTHR11730,PTHR11730:SF47	-	-	K03320	GO:0016020,GO:0015696,GO:0008519,GO:0072488	-	AT2G38290	AMT2	ammonium transporter 2	ammonium transporter 2	encodes a high-affinity ammonium transporter, which is expressed in shoot and root. Expression in root and shoot is under nitrogen and carbon dioxide regulation, respectively.	ammonium transporter 2 (AMT2); FUNCTIONS IN: ammonium transmembrane transporter activity, high affinity secondary active ammonium transmembrane transporter activity; INVOLVED IN: ammonium transport, response to nematode, cellular response to nitrogen starvation; LOCATED IN: plasma membrane; EXPRESSED IN: 24 plant structures; EXPRESSED DURING: 13 growth stages; CONTAINS InterPro DOMAIN/s: Ammonium…	PF00909	PTHR11730,PTHR11730:SF38	KOG0682	-	K03320	GO:0016020,GO:0015696,GO:0008519,GO:0072488
13	2820280	2.09e-09	Al27	Potri.013G040500	2816206	2820242	+	3'	38	13_2820280	8.67985	PASS	Potri.013G040500	-	PTHR34574,PTHR34574:SF1	-	-	-	-	-	AT5G28830	-	calcium-binding EF hand family protein	calcium-binding EF hand family protein	-	calcium-binding EF hand family protein; FUNCTIONS IN: calcium ion binding; INVOLVED IN: biological_process unknown; LOCATED IN: cellular_component unknown; CONTAINS InterPro DOMAIN/s: Calcium-binding EF-hand (InterPro:IPR002048); BEST Arabidopsis thaliana protein match is: Calcium-binding EF-hand family protein (TAIR:AT4G38810.2); Has 259 Blast hits to 210 proteins in 27 species: Archae - 0; Bact…	-	PTHR34574,PTHR34574:SF1	-	-	-	-
13	2820280	2.09e-09	Al27	Potri.013G040600	2821496	2825163	-	5'	1216	13_2820280	8.67985	PASS	Potri.013G040600	PF16363	PTHR10366,PTHR10366:SF327	KOG1429	5.1.3.18	K10046	-	-	AT5G28840	GME	GDP-D-mannose 3',5'-epimerase	GDP-D-mannose 3',5'-epimerase	Encodes a protein with GDP-D-mannose 3',5'-epimerase activity. The enzyme is involved in ascorbate biosynthesis. It catalyzes the conversion of GDP-D-mannose to GDP-L-galactose.	GDP-D-mannose 3',5'-epimerase (GME); CONTAINS InterPro DOMAIN/s: NAD-dependent epimerase/dehydratase (InterPro:IPR001509), NAD(P)-binding domain (InterPro:IPR016040); BEST Arabidopsis thaliana protein match is: NAD(P)-binding Rossmann-fold superfamily protein (TAIR:AT3G62830.2).	PF16363	PTHR10366,PTHR10366:SF327	-	5.1.3.18	K10046	-
4	17403483	2.16e-09	Cu65	Potri.004G152000	17394422	17397013	-	3'	6470	4_17403483	8.66555	PASS	Potri.004G152000	PF13041,PF01535	PTHR24015,PTHR24015:SF714	-	-	-	-	-	AT3G18840	-	Tetratricopeptide repeat (TPR)-like superfamily protein	Tetratricopeptide repeat (TPR)-like superfamily protein	-	Tetratricopeptide repeat (TPR)-like superfamily protein; CONTAINS InterPro DOMAIN/s: Pentatricopeptide repeat (InterPro:IPR002885); BEST Arabidopsis thaliana protein match is: Pentatricopeptide repeat (PPR) superfamily protein (TAIR:AT2G13600.1); Has 42936 Blast hits to 13106 proteins in 190 species: Archae - 0; Bacteria - 3; Metazoa - 51; Fungi - 30; Plants - 42456; Viruses - 0; Other Eukaryotes…	PF13041,PF01535	PTHR24015,PTHR24015:SF714	-	-	-	-
4	17403483	2.16e-09	Cu65	Potri.004G152100	17397729	17401939	-	3'	1544	4_17403483	8.66555	PASS	Potri.004G152100	PF00294	PTHR10584,PTHR10584:SF188	KOG2855	-	-	-	-	AT1G49350	-	pfkB-like carbohydrate kinase family protein	pfkB-like carbohydrate kinase family protein	-	pfkB-like carbohydrate kinase family protein; FUNCTIONS IN: kinase activity, ribokinase activity; INVOLVED IN: D-ribose metabolic process; LOCATED IN: cellular_component unknown; EXPRESSED IN: 22 plant structures; EXPRESSED DURING: 13 growth stages; CONTAINS InterPro DOMAIN/s: Carbohydrate/purine kinase (InterPro:IPR011611), Ribokinase (InterPro:IPR002139), Carbohydrate/puine kinase, PfkB, conser…	PF00294	PTHR10584,PTHR10584:SF188	KOG2855	2.7.1.83	-	-
4	17403483	2.16e-09	Cu65	Potri.004G152200	17408424	17408594	+	5'	4941	4_17403483	8.66555	PASS
4	17444096	2.43e-09	Cu65	Potri.004G152400	17421330	17438179	-	3'	5917	4_17444096	8.61439	PASS	Potri.004G152400	PF00613,PF00454	PTHR10048,PTHR10048:SF15	-	2.7.1.67	K00888	GO:0016773,GO:0048015,GO:0046854	-	AT1G49340	ATPI4K ALPHA	Phosphatidylinositol 3- and 4-kinase family protein	Phosphatidylinositol 3- and 4-kinase family protein	Encodes a phosphatidylinositol 4-kinase that is expressed in inflorescences and shoots.	ATPI4K ALPHA; FUNCTIONS IN: 1-phosphatidylinositol 4-kinase activity, inositol or phosphatidylinositol kinase activity; INVOLVED IN: protein amino acid phosphorylation; LOCATED IN: plasma membrane; EXPRESSED IN: shoot, male gametophyte, flower, pollen tube; EXPRESSED DURING: L mature pollen stage, M germinated pollen stage; CONTAINS InterPro DOMAIN/s: Phosphoinositide 3-kinase, accessory (PIK) do…	PF00613,PF00454	PTHR10048,PTHR10048:SF15	-	2.7.1.67	K00888	GO:0016773,GO:0048015,GO:0046854
4	17444096	2.43e-09	Cu65	Potri.004G152500	17442848	17443057	-	3'	1039	4_17444096	8.61439	PASS	Potri.004G152500	-	PTHR34272	-	-	-	-	-	AT2G16190	-	-	-	-	BEST Arabidopsis thaliana protein match is: hydroxyproline-rich glycoprotein family protein (TAIR:AT1G49330.1); Has 77 Blast hits to 77 proteins in 25 species: Archae - 0; Bacteria - 0; Metazoa - 6; Fungi - 13; Plants - 56; Viruses - 0; Other Eukaryotes - 2 (source: NCBI BLink).	-	-	-	-	-	-
4	17444096	2.43e-09	Cu65	Potri.004G152600	17446134	17447150	-	5'	2038	4_17444096	8.61439	PASS	Potri.004G152600	-	PTHR34272	-	-	-	-	-	AT1G49330	-	hydroxyproline-rich glycoprotein family protein	hydroxyproline-rich glycoprotein family protein	-	hydroxyproline-rich glycoprotein family protein; BEST Arabidopsis thaliana protein match is: unknown protein (TAIR:AT2G16190.1); Has 882 Blast hits to 731 proteins in 140 species: Archae - 0; Bacteria - 49; Metazoa - 218; Fungi - 71; Plants - 381; Viruses - 66; Other Eukaryotes - 97 (source: NCBI BLink).	-	PTHR34272	-	-	-	-
4	17444096	2.43e-09	Cu65	Potri.004G152700	17450768	17452288	+	5'	6672	4_17444096	8.61439	PASS	Potri.004G152700	-	PTHR35989,PTHR35989:SF1	-	-	-	-	-	AT1G11760	MED32	-	-	-	MED32; Has 41 Blast hits to 40 proteins in 14 species: Archae - 0; Bacteria - 0; Metazoa - 0; Fungi - 0; Plants - 41; Viruses - 0; Other Eukaryotes - 0 (source: NCBI BLink).	-	PTHR35989,PTHR35989:SF1	-	-	-	-
376	15308	2.62e-09	Na23	Potri.T142000	17347	17835	-	5'	2039	376_15308	8.5817	PASS	Potri.T142000	-	-	-	-	-	-	-	-	-	-	-	-	-	-	-	-	-	-	-
376	15308	2.62e-09	Na23	Potri.T142100	23552	23824	+	5'	8244	376_15308	8.5817	PASS	Potri.T142100	-	PTHR33348,PTHR33348:SF2	-	-	-	-	-	AT2G35612	-	-	-	-	FUNCTIONS IN: molecular_function unknown; INVOLVED IN: biological_process unknown; LOCATED IN: endomembrane system; EXPRESSED IN: flower; BEST Arabidopsis thaliana protein match is: Copper amine oxidase family protein (TAIR:AT1G31670.1); Has 35333 Blast hits to 34131 proteins in 2444 species: Archae - 798; Bacteria - 22429; Metazoa - 974; Fungi - 991; Plants - 531; Viruses - 0; Other Eukaryotes -…	-	PTHR33348,PTHR33348:SF2	-	-	-	-
4	17441808	2.65e-09	Cu65	Potri.004G152400	17421330	17438179	-	3'	3629	4_17441808	8.57675	PASS	Potri.004G152400	PF00613,PF00454	PTHR10048,PTHR10048:SF15	-	2.7.1.67	K00888	GO:0016773,GO:0048015,GO:0046854	-	AT1G49340	ATPI4K ALPHA	Phosphatidylinositol 3- and 4-kinase family protein	Phosphatidylinositol 3- and 4-kinase family protein	Encodes a phosphatidylinositol 4-kinase that is expressed in inflorescences and shoots.	ATPI4K ALPHA; FUNCTIONS IN: 1-phosphatidylinositol 4-kinase activity, inositol or phosphatidylinositol kinase activity; INVOLVED IN: protein amino acid phosphorylation; LOCATED IN: plasma membrane; EXPRESSED IN: shoot, male gametophyte, flower, pollen tube; EXPRESSED DURING: L mature pollen stage, M germinated pollen stage; CONTAINS InterPro DOMAIN/s: Phosphoinositide 3-kinase, accessory (PIK) do…	PF00613,PF00454	PTHR10048,PTHR10048:SF15	-	2.7.1.67	K00888	GO:0016773,GO:0048015,GO:0046854
4	17441808	2.65e-09	Cu65	Potri.004G152500	17442848	17443057	-	5'	1040	4_17441808	8.57675	PASS	Potri.004G152500	-	PTHR34272	-	-	-	-	-	AT2G16190	-	-	-	-	BEST Arabidopsis thaliana protein match is: hydroxyproline-rich glycoprotein family protein (TAIR:AT1G49330.1); Has 77 Blast hits to 77 proteins in 25 species: Archae - 0; Bacteria - 0; Metazoa - 6; Fungi - 13; Plants - 56; Viruses - 0; Other Eukaryotes - 2 (source: NCBI BLink).	-	-	-	-	-	-
4	17441808	2.65e-09	Cu65	Potri.004G152600	17446134	17447150	-	5'	4326	4_17441808	8.57675	PASS	Potri.004G152600	-	PTHR34272	-	-	-	-	-	AT1G49330	-	hydroxyproline-rich glycoprotein family protein	hydroxyproline-rich glycoprotein family protein	-	hydroxyproline-rich glycoprotein family protein; BEST Arabidopsis thaliana protein match is: unknown protein (TAIR:AT2G16190.1); Has 882 Blast hits to 731 proteins in 140 species: Archae - 0; Bacteria - 49; Metazoa - 218; Fungi - 71; Plants - 381; Viruses - 66; Other Eukaryotes - 97 (source: NCBI BLink).	-	PTHR34272	-	-	-	-
4	17441808	2.65e-09	Cu65	Potri.004G152700	17450768	17452288	+	5'	8960	4_17441808	8.57675	PASS	Potri.004G152700	-	PTHR35989,PTHR35989:SF1	-	-	-	-	-	AT1G11760	MED32	-	-	-	MED32; Has 41 Blast hits to 40 proteins in 14 species: Archae - 0; Bacteria - 0; Metazoa - 0; Fungi - 0; Plants - 41; Viruses - 0; Other Eukaryotes - 0 (source: NCBI BLink).	-	PTHR35989,PTHR35989:SF1	-	-	-	-
6	1662858	2.77e-09	Na23	Potri.006G023500	1649436	1660125	-	3'	2733	6_1662858	8.55752	PASS	Potri.006G023500	PF14631	PTHR32086	-	-	K10891	GO:0006281	-	AT4G14970	-	-	-	-	unknown protein; FUNCTIONS IN: molecular_function unknown; INVOLVED IN: biological_process unknown; LOCATED IN: chloroplast; EXPRESSED IN: 14 plant structures; EXPRESSED DURING: 6 growth stages; Has 257 Blast hits to 164 proteins in 70 species: Archae - 0; Bacteria - 4; Metazoa - 189; Fungi - 0; Plants - 38; Viruses - 0; Other Eukaryotes - 26 (source: NCBI BLink).	PF14631	PTHR32086	-	-	K10891	GO:0006281
6	1662858	2.77e-09	Na23	Potri.006G023600	1666183	1668012	+	5'	3325	6_1662858	8.55752	PASS	Potri.006G023600	PF00201	PTHR11926,PTHR11926:SF235	KOG1192	2.4.1.324	-	GO:0016758,GO:0008152	-	AT1G22360	AtUGT85A2	UDP-glucosyl transferase 85A2	UDP-glucosyl transferase 85A2	-	UDP-glucosyl transferase 85A2 (UGT85A2); FUNCTIONS IN: UDP-glycosyltransferase activity, transferase activity, transferring glycosyl groups, glucuronosyltransferase activity; INVOLVED IN: metabolic process; LOCATED IN: cellular_component unknown; EXPRESSED IN: 21 plant structures; EXPRESSED DURING: 11 growth stages; CONTAINS InterPro DOMAIN/s: UDP-glucuronosyl/UDP-glucosyltransferase (InterPro:IP…	PF00201	PTHR11926,PTHR11926:SF233	KOG1192	2.4.1.203	-	GO:0016758,GO:0008152
6	10780001	2.89e-09	Al27	Potri.006G131400	10766388	10771476	+	3'	8525	6_10780001	8.5391	PASS	Potri.006G131400	-	PTHR34224,PTHR34224:SF4	-	-	-	-	-	AT2G37080	RIP3	ROP interactive partner 3	ROP interactive partner 3	Encodes RIP2 (ROP interactive partner 2), a putative Rho protein effector, interacting specifically with the active form of ROPs (Rho proteins of plants).	ROP interactive partner 3 (RIP3); LOCATED IN: chloroplast; EXPRESSED IN: 21 plant structures; EXPRESSED DURING: 12 growth stages; BEST Arabidopsis thaliana protein match is: ROP interactive partner 4 (TAIR:AT3G53350.1); Has 147635 Blast hits to 77239 proteins in 3391 species: Archae - 1987; Bacteria - 30902; Metazoa - 62424; Fungi - 12574; Plants - 8109; Viruses - 683; Other Eukaryotes - 30956 (s…	-	PTHR34224,PTHR34224:SF4	-	-	-	-
6	10780001	2.89e-09	Al27	Potri.006G131500	10779854	10781784	+	in gene	0	6_10780001	8.5391	PASS	Potri.006G131500	PF00164	PTHR11652,PTHR11652:SF16	KOG1749	-	K02973	GO:0006412,GO:0005840,GO:0005622,GO:0003735	-	AT5G02960	-	Ribosomal protein S12/S23 family protein	Ribosomal protein S12/S23 family protein	-	Ribosomal protein S12/S23 family protein; FUNCTIONS IN: structural constituent of ribosome; INVOLVED IN: translation; LOCATED IN: cytosolic small ribosomal subunit, cytosolic ribosome, ribosome; EXPRESSED IN: guard cell, leaf; CONTAINS InterPro DOMAIN/s: Ribosomal protein S23, eukaryotic/archaeal (InterPro:IPR005680), Ribosomal protein S12/S23 (InterPro:IPR006032), Nucleic acid-binding, OB-fold-l…	PF00164	PTHR11652,PTHR11652:SF16	KOG1749	-	K02973	GO:0006412,GO:0005840,GO:0005622,GO:0003735
6	10780001	2.89e-09	Al27	Potri.006G131600	10789470	10791251	-	5'	9469	6_10780001	8.5391	PASS	Potri.006G131600	-	-	-	-	-	-	-	-	-	-	-	-	-	-	-	-	-	-	-
1	1798904	3.23e-09	Al27	Potri.001G023700	1788902	1789483	-	3'	9421	1_1798904	8.4908	PASS	Potri.001G023700	PF03018	PTHR21495,PTHR21495:SF59	-	-	-	-	-	AT1G65870	-	Disease resistance-responsive (dirigent-like protein) family protein	Disease resistance-responsive (dirigent-like protein) family protein	-	Disease resistance-responsive (dirigent-like protein) family protein; FUNCTIONS IN: molecular_function unknown; INVOLVED IN: lignan biosynthetic process, defense response; LOCATED IN: cell wall; EXPRESSED IN: 13 plant structures; EXPRESSED DURING: 9 growth stages; CONTAINS InterPro DOMAIN/s: Plant disease resistance response protein (InterPro:IPR004265); BEST Arabidopsis thaliana protein match is…	PF03018	PTHR21495,PTHR21495:SF71	-	-	-	-
1	1798904	3.23e-09	Al27	Potri.001G023800	1794327	1795595	-	3'	3309	1_1798904	8.4908	PASS	Potri.001G023800	PF03018	PTHR21495,PTHR21495:SF75	-	-	-	-	-	AT3G13650	-	Disease resistance-responsive (dirigent-like protein) family protein	Disease resistance-responsive (dirigent-like protein) family protein	-	Disease resistance-responsive (dirigent-like protein) family protein; FUNCTIONS IN: molecular_function unknown; INVOLVED IN: lignan biosynthetic process, defense response; LOCATED IN: endomembrane system; EXPRESSED IN: 20 plant structures; EXPRESSED DURING: 11 growth stages; CONTAINS InterPro DOMAIN/s: Plant disease resistance response protein (InterPro:IPR004265); BEST Arabidopsis thaliana prote…	PF03018	PTHR21495,PTHR21495:SF59	-	-	-	-
1	1798904	3.23e-09	Al27	Potri.001G023900	1796080	1799608	-	in gene	0	1_1798904	8.4908	PASS	Potri.001G023900	PF14416,PF13839	PTHR32285,PTHR32285:SF36	-	-	-	-	-	AT1G29050	TBL38	TRICHOME BIREFRINGENCE-LIKE 38	TRICHOME BIREFRINGENCE-LIKE 38	Encodes a member of the TBL (TRICHOME BIREFRINGENCE-LIKE) gene family containing a plant-specific DUF231 (domain of unknown function) domain. TBL gene family has 46 members, two of which (TBR/AT5G06700 and TBL3/AT5G01360) have been shown to be involved in the synthesis and deposition of secondary wall cellulose, presumably by influencing the esterification state of pectic polymers. A nomenclature…	TRICHOME BIREFRINGENCE-LIKE 38 (TBL38); INVOLVED IN: biological_process unknown; LOCATED IN: endomembrane system; EXPRESSED IN: 22 plant structures; EXPRESSED DURING: 12 growth stages; CONTAINS InterPro DOMAIN/s: Protein of unknown function DUF231, plant (InterPro:IPR004253); BEST Arabidopsis thaliana protein match is: TRICHOME BIREFRINGENCE-LIKE 37 (TAIR:AT2G34070.1); Has 1347 Blast hits to 1329…	PF14416,PF13839	PTHR32285,PTHR32285:SF15	-	-	-	-
1	1798904	3.23e-09	Al27	Potri.001G024000	1801851	1803677	+	5'	2947	1_1798904	8.4908	PASS	Potri.001G024000	PF09811	PTHR18829,PTHR18829:SF0	KOG4774	-	-	-	-	AT1G34570	-	Essential protein Yae1, N-terminal	Essential protein Yae1, N-terminal	-	Essential protein Yae1, N-terminal; CONTAINS InterPro DOMAIN/s: Essential protein Yae1, N-terminal (InterPro:IPR019191); BEST Arabidopsis thaliana protein match is: Essential protein Yae1, N-terminal (TAIR:AT3G15750.1); Has 136 Blast hits to 136 proteins in 50 species: Archae - 0; Bacteria - 0; Metazoa - 55; Fungi - 17; Plants - 55; Viruses - 0; Other Eukaryotes - 9 (source: NCBI BLink).	PF09811	PTHR18829,PTHR18829:SF0	KOG4774	-	-	-
1	1798904	3.23e-09	Al27	Potri.001G024100	1804238	1807952	-	5'	5334	1_1798904	8.4908	PASS	Potri.001G024100	PF07839	PTHR33923,PTHR33923:SF2	-	2.7.11.17	-	GO:0005516	-	AT2G38800	-	Plant calmodulin-binding protein-related	Plant calmodulin-binding protein-related	-	Plant calmodulin-binding protein-related; CONTAINS InterPro DOMAIN/s: Calmodulin-binding protein, plant (InterPro:IPR012417); BEST Arabidopsis thaliana protein match is: Plant calmodulin-binding protein-related (TAIR:AT3G54570.1); Has 4321 Blast hits to 2381 proteins in 392 species: Archae - 26; Bacteria - 2334; Metazoa - 540; Fungi - 255; Plants - 198; Viruses - 28; Other Eukaryotes - 940 (sourc…	PF07839	PTHR33923,PTHR33923:SF2	-	2.7.11.17	-	GO:0005516
9	6324094	3.37e-09	Mg25	Potri.009G061100	6310104	6314535	-	3'	9559	9_6324094	8.47237	PASS	Potri.009G061100	PF01554	PTHR11206,PTHR11206:SF156	KOG1347	-	-	GO:0055085,GO:0016020,GO:0015297,GO:0015238,GO:0006855	-	AT3G08040	ATFRD3	MATE efflux family protein	MATE efflux family protein	Encodes a member of the MATE (multidrug and toxin efflux family), expressed in roots but not shoots. Mutants accumulate excess iron, manganese and zinc, and express root Fe(III) chelatase activity even under iron sufficiency conditions. FRD3 is likely to function in root xylem loading of an iron chelator or other factor necessary for efficient iron uptake out of the xylem or apoplastic space and …	FERRIC REDUCTASE DEFECTIVE 3 (FRD3); FUNCTIONS IN: antiporter activity, transporter activity; INVOLVED IN: cellular iron ion homeostasis; LOCATED IN: plasma membrane, membrane; EXPRESSED IN: 20 plant structures; EXPRESSED DURING: 4 anthesis, F mature embryo stage, petal differentiation and expansion stage, D bilateral stage; CONTAINS InterPro DOMAIN/s: Multi antimicrobial extrusion protein MatE (…	PF01554	PTHR11206,PTHR11206:SF156	KOG1347	-	-	GO:0055085,GO:0016020,GO:0015297,GO:0015238,GO:0006855
9	6324094	3.37e-09	Mg25	Potri.009G061200	6318284	6319678	+	3'	4416	9_6324094	8.47237	PASS	Potri.009G061200	-	-	-	-	-	-	-	-	-	-	-	-	-	-	-	-	-	-	-
9	6324094	3.37e-09	Mg25	Potri.009G061300	6331884	6334069	-	5'	7790	9_6324094	8.47237	PASS	Potri.009G061300	-	PTHR31852,PTHR31852:SF46	-	-	-	-	-	AT3G08490	-	-	-	-	BEST Arabidopsis thaliana protein match is: Late embryogenesis abundant protein, group 2 (TAIR:AT3G24600.1); Has 161 Blast hits to 158 proteins in 15 species: Archae - 0; Bacteria - 0; Metazoa - 0; Fungi - 0; Plants - 161; Viruses - 0; Other Eukaryotes - 0 (source: NCBI BLink).	-	PTHR31852,PTHR31852:SF46	-	-	-	-
4	17404222	3.39e-09	Cu65	Potri.004G152000	17394422	17397013	-	3'	7209	4_17404222	8.4698	PASS	Potri.004G152000	PF13041,PF01535	PTHR24015,PTHR24015:SF714	-	-	-	-	-	AT3G18840	-	Tetratricopeptide repeat (TPR)-like superfamily protein	Tetratricopeptide repeat (TPR)-like superfamily protein	-	Tetratricopeptide repeat (TPR)-like superfamily protein; CONTAINS InterPro DOMAIN/s: Pentatricopeptide repeat (InterPro:IPR002885); BEST Arabidopsis thaliana protein match is: Pentatricopeptide repeat (PPR) superfamily protein (TAIR:AT2G13600.1); Has 42936 Blast hits to 13106 proteins in 190 species: Archae - 0; Bacteria - 3; Metazoa - 51; Fungi - 30; Plants - 42456; Viruses - 0; Other Eukaryotes…	PF13041,PF01535	PTHR24015,PTHR24015:SF714	-	-	-	-
4	17404222	3.39e-09	Cu65	Potri.004G152100	17397729	17401939	-	3'	2283	4_17404222	8.4698	PASS	Potri.004G152100	PF00294	PTHR10584,PTHR10584:SF188	KOG2855	-	-	-	-	AT1G49350	-	pfkB-like carbohydrate kinase family protein	pfkB-like carbohydrate kinase family protein	-	pfkB-like carbohydrate kinase family protein; FUNCTIONS IN: kinase activity, ribokinase activity; INVOLVED IN: D-ribose metabolic process; LOCATED IN: cellular_component unknown; EXPRESSED IN: 22 plant structures; EXPRESSED DURING: 13 growth stages; CONTAINS InterPro DOMAIN/s: Carbohydrate/purine kinase (InterPro:IPR011611), Ribokinase (InterPro:IPR002139), Carbohydrate/puine kinase, PfkB, conser…	PF00294	PTHR10584,PTHR10584:SF188	KOG2855	2.7.1.83	-	-
4	17404222	3.39e-09	Cu65	Potri.004G152200	17408424	17408594	+	5'	4202	4_17404222	8.4698	PASS
8	7704857	3.56e-09	Al27	Potri.008G119300	7694865	7696543	-	3'	8314	8_7704857	8.44855	PASS	Potri.008G119300	-	-	-	-	-	-	-	AT1G68585	-	-	-	-	unknown protein; Has 23 Blast hits to 23 proteins in 6 species: Archae - 0; Bacteria - 0; Metazoa - 0; Fungi - 0; Plants - 23; Viruses - 0; Other Eukaryotes - 0 (source: NCBI BLink).	-	-	-	-	-	-
8	7704857	3.56e-09	Al27	Potri.008G119400	7697293	7702121	-	3'	2736	8_7704857	8.44855	PASS	Potri.008G119400	PF01426,PF05641	PTHR31917,PTHR31917:SF9	-	-	-	GO:0003682	-	AT1G68580	-	agenet domain-containing protein / bromo-adjacent homology (BAH) domain-containing protein	agenet domain-containing protein / bromo-adjacent homology (BAH) domain-containing protein	-	agenet domain-containing protein / bromo-adjacent homology (BAH) domain-containing protein; FUNCTIONS IN: RNA binding, DNA binding; INVOLVED IN: biological_process unknown; LOCATED IN: cellular_component unknown; EXPRESSED IN: 24 plant structures; EXPRESSED DURING: 15 growth stages; CONTAINS InterPro DOMAIN/s: Tudor-like, plant (InterPro:IPR014002), Agenet (InterPro:IPR008395), Bromo adjacent hom…	PF01426,PF05641	PTHR31917,PTHR31917:SF9	-	2.1.1.37	-	GO:0003682
8	7704857	3.56e-09	Al27	Potri.008G119500	7706881	7710435	+	5'	2024	8_7704857	8.44855	PASS	Potri.008G119500	PF02817,PF00364,PF00198	PTHR23151,PTHR23151:SF61	KOG0557	2.3.1.12	K00627	GO:0016746,GO:0008152	-	AT3G25860	LTA2	2-oxoacid dehydrogenases acyltransferase family protein	2-oxoacid dehydrogenases acyltransferase family protein	Nuclear encoded dihydrolipoamide S-acetyltransferase (LTA2) that encodes teh Pyruvate Decarboxylase E2 subunit. Mutant has embryo defect.	LTA2; FUNCTIONS IN: dihydrolipoyllysine-residue acetyltransferase activity; INVOLVED IN: metabolic process, acetyl-CoA biosynthetic process from pyruvate; LOCATED IN: cytosolic ribosome, chloroplast stroma, chloroplast, membrane, chloroplast envelope; EXPRESSED IN: 24 plant structures; EXPRESSED DURING: 15 growth stages; CONTAINS InterPro DOMAIN/s: 2-oxo acid dehydrogenase, lipoyl-binding site (I…	PF02817,PF00364,PF00198	PTHR23151,PTHR23151:SF61	KOG0557	2.3.1.12	K00627	GO:0016746,GO:0008152
8	7704857	3.56e-09	Al27	Potri.008G119600	7710558	7713352	-	5'	5701	8_7704857	8.44855	PASS	Potri.008G119600	PF08718	PTHR10219,PTHR10219:SF28	KOG4189	-	-	GO:0051861,GO:0046836,GO:0017089,GO:0005737	-	AT4G39670	-	Glycolipid transfer protein (GLTP) family protein	Glycolipid transfer protein (GLTP) family protein	-	Glycolipid transfer protein (GLTP) family protein; FUNCTIONS IN: glycolipid transporter activity, glycolipid binding; INVOLVED IN: glycolipid transport; LOCATED IN: cytoplasm; EXPRESSED IN: 16 plant structures; EXPRESSED DURING: 10 growth stages; CONTAINS InterPro DOMAIN/s: Glycolipid transfer protein, GLTP (InterPro:IPR014830); BEST Arabidopsis thaliana protein match is: Glycolipid transfer prot…	PF08718	PTHR10219,PTHR10219:SF28	KOG4189	-	-	GO:0051861,GO:0046836,GO:0017089,GO:0005737
6	1663601	3.82e-09	Na23	Potri.006G023500	1649436	1660125	-	3'	3476	6_1663601	8.41794	PASS	Potri.006G023500	PF14631	PTHR32086	-	-	K10891	GO:0006281	-	AT4G14970	-	-	-	-	unknown protein; FUNCTIONS IN: molecular_function unknown; INVOLVED IN: biological_process unknown; LOCATED IN: chloroplast; EXPRESSED IN: 14 plant structures; EXPRESSED DURING: 6 growth stages; Has 257 Blast hits to 164 proteins in 70 species: Archae - 0; Bacteria - 4; Metazoa - 189; Fungi - 0; Plants - 38; Viruses - 0; Other Eukaryotes - 26 (source: NCBI BLink).	PF14631	PTHR32086	-	-	K10891	GO:0006281
6	1663601	3.82e-09	Na23	Potri.006G023600	1666183	1668012	+	5'	2582	6_1663601	8.41794	PASS	Potri.006G023600	PF00201	PTHR11926,PTHR11926:SF235	KOG1192	2.4.1.324	-	GO:0016758,GO:0008152	-	AT1G22360	AtUGT85A2	UDP-glucosyl transferase 85A2	UDP-glucosyl transferase 85A2	-	UDP-glucosyl transferase 85A2 (UGT85A2); FUNCTIONS IN: UDP-glycosyltransferase activity, transferase activity, transferring glycosyl groups, glucuronosyltransferase activity; INVOLVED IN: metabolic process; LOCATED IN: cellular_component unknown; EXPRESSED IN: 21 plant structures; EXPRESSED DURING: 11 growth stages; CONTAINS InterPro DOMAIN/s: UDP-glucuronosyl/UDP-glucosyltransferase (InterPro:IP…	PF00201	PTHR11926,PTHR11926:SF233	KOG1192	2.4.1.203	-	GO:0016758,GO:0008152
13	12688631	3.92e-09	Al27	Potri.013G113500	12677050	12680616	-	3'	8015	13_12688631	8.40671	PASS	Potri.013G113500	PF02536	PTHR13068,PTHR13068:SF26	-	-	-	GO:0006355,GO:0005739,GO:0003690	-	AT4G09620	-	Mitochondrial transcription termination factor family protein	Mitochondrial transcription termination factor family protein	-	Mitochondrial transcription termination factor family protein; FUNCTIONS IN: molecular_function unknown; INVOLVED IN: biological_process unknown; LOCATED IN: chloroplast; EXPRESSED IN: 24 plant structures; EXPRESSED DURING: 15 growth stages; CONTAINS InterPro DOMAIN/s: Mitochodrial transcription termination factor-related (InterPro:IPR003690); Has 234 Blast hits to 198 proteins in 25 species: Arc…	PF02536	PTHR13068,PTHR13068:SF26	-	-	-	GO:0006355,GO:0005739,GO:0003690
13	12688631	3.92e-09	Al27	Potri.013G113600	12690046	12690426	-	5'	1415	13_12688631	8.40671	PASS	Potri.013G113600	-	PTHR34453	-	-	-	-	-	AT5G52605	-	Defensin-like (DEFL) family protein	Defensin-like (DEFL) family protein	Encodes a defensin-like (DEFL) family protein.	Defensin-like (DEFL) family protein; LOCATED IN: endomembrane system; BEST Arabidopsis thaliana protein match is: Defensin-like (DEFL) family protein (TAIR:AT4G14276.1); Has 48 Blast hits to 46 proteins in 4 species: Archae - 0; Bacteria - 0; Metazoa - 0; Fungi - 0; Plants - 48; Viruses - 0; Other Eukaryotes - 0 (source: NCBI BLink).	-	PTHR34453	-	-	-	-
13	12688631	3.92e-09	Al27	Potri.013G113700	12693461	12700190	+	5'	4830	13_12688631	8.40671	PASS	Potri.013G113700	PF04765	PTHR12956,PTHR12956:SF24	-	-	-	-	-	AT1G34550	EMB2756	Protein of unknown function (DUF616)	Protein of unknown function (DUF616)	-	EMBRYO DEFECTIVE 2756 (EMB2756); INVOLVED IN: response to cadmium ion, embryo development ending in seed dormancy; EXPRESSED IN: 25 plant structures; EXPRESSED DURING: 13 growth stages; CONTAINS InterPro DOMAIN/s: Protein of unknown function DUF616 (InterPro:IPR006852); BEST Arabidopsis thaliana protein match is: Protein of unknown function (DUF616) (TAIR:AT4G09630.1); Has 593 Blast hits to 590 p…	PF04765	PTHR12956,PTHR12956:SF24	-	-	-	-
4	17442374	4.51e-09	Cu65	Potri.004G152400	17421330	17438179	-	3'	4195	4_17442374	8.34582	PASS	Potri.004G152400	PF00613,PF00454	PTHR10048,PTHR10048:SF15	-	2.7.1.67	K00888	GO:0016773,GO:0048015,GO:0046854	-	AT1G49340	ATPI4K ALPHA	Phosphatidylinositol 3- and 4-kinase family protein	Phosphatidylinositol 3- and 4-kinase family protein	Encodes a phosphatidylinositol 4-kinase that is expressed in inflorescences and shoots.	ATPI4K ALPHA; FUNCTIONS IN: 1-phosphatidylinositol 4-kinase activity, inositol or phosphatidylinositol kinase activity; INVOLVED IN: protein amino acid phosphorylation; LOCATED IN: plasma membrane; EXPRESSED IN: shoot, male gametophyte, flower, pollen tube; EXPRESSED DURING: L mature pollen stage, M germinated pollen stage; CONTAINS InterPro DOMAIN/s: Phosphoinositide 3-kinase, accessory (PIK) do…	PF00613,PF00454	PTHR10048,PTHR10048:SF15	-	2.7.1.67	K00888	GO:0016773,GO:0048015,GO:0046854
4	17442374	4.51e-09	Cu65	Potri.004G152500	17442848	17443057	-	5'	474	4_17442374	8.34582	PASS	Potri.004G152500	-	PTHR34272	-	-	-	-	-	AT2G16190	-	-	-	-	BEST Arabidopsis thaliana protein match is: hydroxyproline-rich glycoprotein family protein (TAIR:AT1G49330.1); Has 77 Blast hits to 77 proteins in 25 species: Archae - 0; Bacteria - 0; Metazoa - 6; Fungi - 13; Plants - 56; Viruses - 0; Other Eukaryotes - 2 (source: NCBI BLink).	-	-	-	-	-	-
4	17442374	4.51e-09	Cu65	Potri.004G152600	17446134	17447150	-	5'	3760	4_17442374	8.34582	PASS	Potri.004G152600	-	PTHR34272	-	-	-	-	-	AT1G49330	-	hydroxyproline-rich glycoprotein family protein	hydroxyproline-rich glycoprotein family protein	-	hydroxyproline-rich glycoprotein family protein; BEST Arabidopsis thaliana protein match is: unknown protein (TAIR:AT2G16190.1); Has 882 Blast hits to 731 proteins in 140 species: Archae - 0; Bacteria - 49; Metazoa - 218; Fungi - 71; Plants - 381; Viruses - 66; Other Eukaryotes - 97 (source: NCBI BLink).	-	PTHR34272	-	-	-	-
4	17442374	4.51e-09	Cu65	Potri.004G152700	17450768	17452288	+	5'	8394	4_17442374	8.34582	PASS	Potri.004G152700	-	PTHR35989,PTHR35989:SF1	-	-	-	-	-	AT1G11760	MED32	-	-	-	MED32; Has 41 Blast hits to 40 proteins in 14 species: Archae - 0; Bacteria - 0; Metazoa - 0; Fungi - 0; Plants - 41; Viruses - 0; Other Eukaryotes - 0 (source: NCBI BLink).	-	PTHR35989,PTHR35989:SF1	-	-	-	-
4	17444682	4.51e-09	Cu65	Potri.004G152400	17421330	17438179	-	3'	6503	4_17444682	8.34582	PASS	Potri.004G152400	PF00613,PF00454	PTHR10048,PTHR10048:SF15	-	2.7.1.67	K00888	GO:0016773,GO:0048015,GO:0046854	-	AT1G49340	ATPI4K ALPHA	Phosphatidylinositol 3- and 4-kinase family protein	Phosphatidylinositol 3- and 4-kinase family protein	Encodes a phosphatidylinositol 4-kinase that is expressed in inflorescences and shoots.	ATPI4K ALPHA; FUNCTIONS IN: 1-phosphatidylinositol 4-kinase activity, inositol or phosphatidylinositol kinase activity; INVOLVED IN: protein amino acid phosphorylation; LOCATED IN: plasma membrane; EXPRESSED IN: shoot, male gametophyte, flower, pollen tube; EXPRESSED DURING: L mature pollen stage, M germinated pollen stage; CONTAINS InterPro DOMAIN/s: Phosphoinositide 3-kinase, accessory (PIK) do…	PF00613,PF00454	PTHR10048,PTHR10048:SF15	-	2.7.1.67	K00888	GO:0016773,GO:0048015,GO:0046854
4	17444682	4.51e-09	Cu65	Potri.004G152500	17442848	17443057	-	3'	1625	4_17444682	8.34582	PASS	Potri.004G152500	-	PTHR34272	-	-	-	-	-	AT2G16190	-	-	-	-	BEST Arabidopsis thaliana protein match is: hydroxyproline-rich glycoprotein family protein (TAIR:AT1G49330.1); Has 77 Blast hits to 77 proteins in 25 species: Archae - 0; Bacteria - 0; Metazoa - 6; Fungi - 13; Plants - 56; Viruses - 0; Other Eukaryotes - 2 (source: NCBI BLink).	-	-	-	-	-	-
4	17444682	4.51e-09	Cu65	Potri.004G152600	17446134	17447150	-	5'	1452	4_17444682	8.34582	PASS	Potri.004G152600	-	PTHR34272	-	-	-	-	-	AT1G49330	-	hydroxyproline-rich glycoprotein family protein	hydroxyproline-rich glycoprotein family protein	-	hydroxyproline-rich glycoprotein family protein; BEST Arabidopsis thaliana protein match is: unknown protein (TAIR:AT2G16190.1); Has 882 Blast hits to 731 proteins in 140 species: Archae - 0; Bacteria - 49; Metazoa - 218; Fungi - 71; Plants - 381; Viruses - 66; Other Eukaryotes - 97 (source: NCBI BLink).	-	PTHR34272	-	-	-	-
4	17444682	4.51e-09	Cu65	Potri.004G152700	17450768	17452288	+	5'	6086	4_17444682	8.34582	PASS	Potri.004G152700	-	PTHR35989,PTHR35989:SF1	-	-	-	-	-	AT1G11760	MED32	-	-	-	MED32; Has 41 Blast hits to 40 proteins in 14 species: Archae - 0; Bacteria - 0; Metazoa - 0; Fungi - 0; Plants - 41; Viruses - 0; Other Eukaryotes - 0 (source: NCBI BLink).	-	PTHR35989,PTHR35989:SF1	-	-	-	-
28	408896	4.55e-09	Al27	Potri.T020800	416820	417059	+	5'	7924	28_408896	8.34199	PASS	Potri.T020800	PF00612	-	-	-	-	GO:0005515	-	-	-	-	-	-	-	-	-	-	-	-	-
17	10944163	4.71e-09	Na23	Potri.017G092400	10947583	10953970	+	5'	3420	17_10944163	8.32698	PASS	Potri.017G092400	PF05193,PF00675	PTHR11851,PTHR11851:SF133	-	1.10.2.2	K17732	-	-	AT3G02090	MPPBETA	Insulinase (Peptidase family M16) protein	Insulinase (Peptidase family M16) protein	-	MPPBETA; FUNCTIONS IN: metalloendopeptidase activity, zinc ion binding; INVOLVED IN: proteolysis; LOCATED IN: in 11 components; EXPRESSED IN: 27 plant structures; EXPRESSED DURING: 17 growth stages; CONTAINS InterPro DOMAIN/s: Peptidase M16, zinc-binding site (InterPro:IPR001431), Peptidase M16, C-terminal (InterPro:IPR007863), Peptidase M16, N-terminal (InterPro:IPR011765), Metalloenzyme, LuxS/M…	PF05193,PF00675	PTHR11851,PTHR11851:SF133	-	1.10.2.2	K17732	-
13	2820279	4.95e-09	Al27	Potri.013G040300	2800317	2810665	-	3'	9614	13_2820279	8.30539	PASS	Potri.013G040300	PF13499	PTHR23050,PTHR23050:SF177	KOG0027	-	-	-	-	AT3G22930	CML11	calmodulin-like 11	calmodulin-like 11	Encodes a calmodulin-like protein.	calmodulin-like 11 (CML11); FUNCTIONS IN: calcium ion binding; INVOLVED IN: biological_process unknown; EXPRESSED IN: 7 plant structures; EXPRESSED DURING: LP.06 six leaves visible, LP.04 four leaves visible, LP.10 ten leaves visible, LP.08 eight leaves visible, LP.12 twelve leaves visible; CONTAINS InterPro DOMAIN/s: EF-Hand 1, calcium-binding site (InterPro:IPR018247), EF-HAND 2 (InterPro:IPR01…	PF13499	PTHR23050	KOG0027	-	K13448	-
13	2820279	4.95e-09	Al27	Potri.013G040400	2813704	2815466	+	3'	4813	13_2820279	8.30539	PASS	Potri.013G040400	PF00909	PTHR11730,PTHR11730:SF47	-	-	K03320	GO:0016020,GO:0015696,GO:0008519,GO:0072488	-	AT2G38290	AMT2	ammonium transporter 2	ammonium transporter 2	encodes a high-affinity ammonium transporter, which is expressed in shoot and root. Expression in root and shoot is under nitrogen and carbon dioxide regulation, respectively.	ammonium transporter 2 (AMT2); FUNCTIONS IN: ammonium transmembrane transporter activity, high affinity secondary active ammonium transmembrane transporter activity; INVOLVED IN: ammonium transport, response to nematode, cellular response to nitrogen starvation; LOCATED IN: plasma membrane; EXPRESSED IN: 24 plant structures; EXPRESSED DURING: 13 growth stages; CONTAINS InterPro DOMAIN/s: Ammonium…	PF00909	PTHR11730,PTHR11730:SF38	KOG0682	-	K03320	GO:0016020,GO:0015696,GO:0008519,GO:0072488
13	2820279	4.95e-09	Al27	Potri.013G040500	2816206	2820242	+	3'	37	13_2820279	8.30539	PASS	Potri.013G040500	-	PTHR34574,PTHR34574:SF1	-	-	-	-	-	AT5G28830	-	calcium-binding EF hand family protein	calcium-binding EF hand family protein	-	calcium-binding EF hand family protein; FUNCTIONS IN: calcium ion binding; INVOLVED IN: biological_process unknown; LOCATED IN: cellular_component unknown; CONTAINS InterPro DOMAIN/s: Calcium-binding EF-hand (InterPro:IPR002048); BEST Arabidopsis thaliana protein match is: Calcium-binding EF-hand family protein (TAIR:AT4G38810.2); Has 259 Blast hits to 210 proteins in 27 species: Archae - 0; Bact…	-	PTHR34574,PTHR34574:SF1	-	-	-	-
13	2820279	4.95e-09	Al27	Potri.013G040600	2821496	2825163	-	5'	1217	13_2820279	8.30539	PASS	Potri.013G040600	PF16363	PTHR10366,PTHR10366:SF327	KOG1429	5.1.3.18	K10046	-	-	AT5G28840	GME	GDP-D-mannose 3',5'-epimerase	GDP-D-mannose 3',5'-epimerase	Encodes a protein with GDP-D-mannose 3',5'-epimerase activity. The enzyme is involved in ascorbate biosynthesis. It catalyzes the conversion of GDP-D-mannose to GDP-L-galactose.	GDP-D-mannose 3',5'-epimerase (GME); CONTAINS InterPro DOMAIN/s: NAD-dependent epimerase/dehydratase (InterPro:IPR001509), NAD(P)-binding domain (InterPro:IPR016040); BEST Arabidopsis thaliana protein match is: NAD(P)-binding Rossmann-fold superfamily protein (TAIR:AT3G62830.2).	PF16363	PTHR10366,PTHR10366:SF327	-	5.1.3.18	K10046	-
4	17441954	4.97e-09	Cu65	Potri.004G152400	17421330	17438179	-	3'	3775	4_17441954	8.30364	PASS	Potri.004G152400	PF00613,PF00454	PTHR10048,PTHR10048:SF15	-	2.7.1.67	K00888	GO:0016773,GO:0048015,GO:0046854	-	AT1G49340	ATPI4K ALPHA	Phosphatidylinositol 3- and 4-kinase family protein	Phosphatidylinositol 3- and 4-kinase family protein	Encodes a phosphatidylinositol 4-kinase that is expressed in inflorescences and shoots.	ATPI4K ALPHA; FUNCTIONS IN: 1-phosphatidylinositol 4-kinase activity, inositol or phosphatidylinositol kinase activity; INVOLVED IN: protein amino acid phosphorylation; LOCATED IN: plasma membrane; EXPRESSED IN: shoot, male gametophyte, flower, pollen tube; EXPRESSED DURING: L mature pollen stage, M germinated pollen stage; CONTAINS InterPro DOMAIN/s: Phosphoinositide 3-kinase, accessory (PIK) do…	PF00613,PF00454	PTHR10048,PTHR10048:SF15	-	2.7.1.67	K00888	GO:0016773,GO:0048015,GO:0046854
4	17441954	4.97e-09	Cu65	Potri.004G152500	17442848	17443057	-	5'	894	4_17441954	8.30364	PASS	Potri.004G152500	-	PTHR34272	-	-	-	-	-	AT2G16190	-	-	-	-	BEST Arabidopsis thaliana protein match is: hydroxyproline-rich glycoprotein family protein (TAIR:AT1G49330.1); Has 77 Blast hits to 77 proteins in 25 species: Archae - 0; Bacteria - 0; Metazoa - 6; Fungi - 13; Plants - 56; Viruses - 0; Other Eukaryotes - 2 (source: NCBI BLink).	-	-	-	-	-	-
4	17441954	4.97e-09	Cu65	Potri.004G152600	17446134	17447150	-	5'	4180	4_17441954	8.30364	PASS	Potri.004G152600	-	PTHR34272	-	-	-	-	-	AT1G49330	-	hydroxyproline-rich glycoprotein family protein	hydroxyproline-rich glycoprotein family protein	-	hydroxyproline-rich glycoprotein family protein; BEST Arabidopsis thaliana protein match is: unknown protein (TAIR:AT2G16190.1); Has 882 Blast hits to 731 proteins in 140 species: Archae - 0; Bacteria - 49; Metazoa - 218; Fungi - 71; Plants - 381; Viruses - 66; Other Eukaryotes - 97 (source: NCBI BLink).	-	PTHR34272	-	-	-	-
4	17441954	4.97e-09	Cu65	Potri.004G152700	17450768	17452288	+	5'	8814	4_17441954	8.30364	PASS	Potri.004G152700	-	PTHR35989,PTHR35989:SF1	-	-	-	-	-	AT1G11760	MED32	-	-	-	MED32; Has 41 Blast hits to 40 proteins in 14 species: Archae - 0; Bacteria - 0; Metazoa - 0; Fungi - 0; Plants - 41; Viruses - 0; Other Eukaryotes - 0 (source: NCBI BLink).	-	PTHR35989,PTHR35989:SF1	-	-	-	-
1	2292	5.01e-09	Na23	Potri.001G000100	1660	2502	-	in gene	0	1_2292	8.30016	PASS
1	2292	5.01e-09	Na23	Potri.001G000200	2906	6646	-	5'	614	1_2292	8.30016	PASS	Potri.001G000200	PF14111	PTHR31286,PTHR31286:SF2	-	3.5.1.28,3.2.1.96	-	-	-	AT2G01050	-	zinc ion binding;nucleic acid binding	zinc ion binding;nucleic acid binding	-	zinc ion binding;nucleic acid binding; FUNCTIONS IN: zinc ion binding, nucleic acid binding; INVOLVED IN: biological_process unknown; LOCATED IN: cellular_component unknown; CONTAINS InterPro DOMAIN/s: Zinc finger, CCHC-type (InterPro:IPR001878); BEST Arabidopsis thaliana protein match is: unknown protein (TAIR:AT3G31430.1); Has 369 Blast hits to 365 proteins in 15 species: Archae - 0; Bacteria -…	PF14392,PF14111	PTHR31286,PTHR31286:SF7	-	-	-	-
1	2292	5.01e-09	Na23	Potri.001G000400	8391	12483	-	5'	6099	1_2292	8.30016	PASS	Potri.001G000400	PF11779	PTHR33727	-	-	-	-	-	AT2G30942	-	Protein of unknown function (DUF3317)	Protein of unknown function (DUF3317)	-	Protein of unknown function (DUF3317); BEST Arabidopsis thaliana protein match is: Protein of unknown function (DUF3317) (TAIR:AT1G06515.2); Has 35333 Blast hits to 34131 proteins in 2444 species: Archae - 798; Bacteria - 22429; Metazoa - 974; Fungi - 991; Plants - 531; Viruses - 0; Other Eukaryotes - 9610 (source: NCBI BLink).	PF11779	PTHR33727	-	-	-	-
1	2292	5.01e-09	Na23	Potri.001G000300	8391	8860	+	5'	6099	1_2292	8.30016	PASS	Potri.001G000300	-	-	-	-	-	-	-	-	-	-	-	-	-	-	-	-	-	-	-
1	32447383	5.18e-09	Al27	Potri.001G319700	32444567	32445636	-	3'	1747	1_32447383	8.28567	PASS	Potri.001G319700	-	PTHR31790	-	-	-	-	-	AT4G12560	CPR30	F-box and associated interaction domains-containing protein	F-box and associated interaction domains-containing protein	Encodes CPR1 (Constitutive Expresser of PR Genes 1, also known as CPR30), a F-Box protein that functions as a negative regulator of defense response and targets resistance proteins.	CONSTITUTIVE EXPRESSER OF PR GENES 30 (CPR30); CONTAINS InterPro DOMAIN/s: F-box domain, cyclin-like (InterPro:IPR001810), F-box domain, Skp2-like (InterPro:IPR022364), F-box associated domain, type 1 (InterPro:IPR006527), F-box associated interaction domain (InterPro:IPR017451); BEST Arabidopsis thaliana protein match is: F-box associated ubiquitination effector family protein (TAIR:AT4G22390.1)…	PF00646,PF07734	PTHR32133,PTHR32133:SF121	-	-	-	GO:0005515
1	32447383	5.18e-09	Al27	Potri.001G319800	32449717	32451961	+	5'	2334	1_32447383	8.28567	PASS	Potri.001G319800	PF00076	PTHR24012	-	-	-	GO:0003676	-	AT4G13850	ATGRP2	glycine-rich RNA-binding protein 2	glycine-rich RNA-binding protein 2	Encodes a glycine-rich RNA-binding protein. Gene expression is induced by cold.	glycine-rich RNA-binding protein 2 (GR-RBP2); FUNCTIONS IN: double-stranded DNA binding, RNA binding, single-stranded DNA binding, copper ion binding, ATP binding; INVOLVED IN: response to cold, seed germination, response to osmotic stress; LOCATED IN: mitochondrion; EXPRESSED IN: 24 plant structures; EXPRESSED DURING: 14 growth stages; CONTAINS InterPro DOMAIN/s: RNA recognition motif, glycine r…	PF00076	PTHR24012	-	-	-	GO:0003676
1	32447383	5.18e-09	Al27	Potri.001G319900	32454440	32457127	+	5'	7057	1_32447383	8.28567	PASS	Potri.001G319900	PF00076	PTHR24012	-	-	-	GO:0003676	-	AT4G13850	ATGRP2	glycine-rich RNA-binding protein 2	glycine-rich RNA-binding protein 2	Encodes a glycine-rich RNA-binding protein. Gene expression is induced by cold.	glycine-rich RNA-binding protein 2 (GR-RBP2); FUNCTIONS IN: double-stranded DNA binding, RNA binding, single-stranded DNA binding, copper ion binding, ATP binding; INVOLVED IN: response to cold, seed germination, response to osmotic stress; LOCATED IN: mitochondrion; EXPRESSED IN: 24 plant structures; EXPRESSED DURING: 14 growth stages; CONTAINS InterPro DOMAIN/s: RNA recognition motif, glycine r…	PF00076	PTHR24012	-	-	-	GO:0003676
4	17402378	5.2e-09	Cu65	Potri.004G151900	17391460	17392494	+	3'	9884	4_17402378	8.284	PASS	Potri.004G151900	-	-	-	-	-	-	-	AT4G36730	GBF1	G-box binding factor 1	G-box binding factor 1	member of a gene family encoding basic leucine zipper proteins (GBFs) which bind the G-box	G-box binding factor 1 (GBF1); CONTAINS InterPro DOMAIN/s: Basic-leucine zipper (bZIP) transcription factor (InterPro:IPR004827), G-box binding, MFMR (InterPro:IPR012900), bZIP transcription factor, bZIP-1 (InterPro:IPR011616); BEST Arabidopsis thaliana protein match is: basic region/leucine zipper transcription factor 16 (TAIR:AT2G35530.1); Has 3891 Blast hits to 3827 proteins in 347 species: Ar…	PF00170,PF07777	PTHR22952,PTHR22952:SF123	KOG3119	-	K09060	GO:0043565,GO:0006355,GO:0003700
4	17402378	5.2e-09	Cu65	Potri.004G152000	17394422	17397013	-	3'	5365	4_17402378	8.284	PASS	Potri.004G152000	PF13041,PF01535	PTHR24015,PTHR24015:SF714	-	-	-	-	-	AT3G18840	-	Tetratricopeptide repeat (TPR)-like superfamily protein	Tetratricopeptide repeat (TPR)-like superfamily protein	-	Tetratricopeptide repeat (TPR)-like superfamily protein; CONTAINS InterPro DOMAIN/s: Pentatricopeptide repeat (InterPro:IPR002885); BEST Arabidopsis thaliana protein match is: Pentatricopeptide repeat (PPR) superfamily protein (TAIR:AT2G13600.1); Has 42936 Blast hits to 13106 proteins in 190 species: Archae - 0; Bacteria - 3; Metazoa - 51; Fungi - 30; Plants - 42456; Viruses - 0; Other Eukaryotes…	PF13041,PF01535	PTHR24015,PTHR24015:SF714	-	-	-	-
4	17402378	5.2e-09	Cu65	Potri.004G152100	17397729	17401939	-	3'	439	4_17402378	8.284	PASS	Potri.004G152100	PF00294	PTHR10584,PTHR10584:SF188	KOG2855	-	-	-	-	AT1G49350	-	pfkB-like carbohydrate kinase family protein	pfkB-like carbohydrate kinase family protein	-	pfkB-like carbohydrate kinase family protein; FUNCTIONS IN: kinase activity, ribokinase activity; INVOLVED IN: D-ribose metabolic process; LOCATED IN: cellular_component unknown; EXPRESSED IN: 22 plant structures; EXPRESSED DURING: 13 growth stages; CONTAINS InterPro DOMAIN/s: Carbohydrate/purine kinase (InterPro:IPR011611), Ribokinase (InterPro:IPR002139), Carbohydrate/puine kinase, PfkB, conser…	PF00294	PTHR10584,PTHR10584:SF188	KOG2855	2.7.1.83	-	-
4	17402378	5.2e-09	Cu65	Potri.004G152200	17408424	17408594	+	5'	6046	4_17402378	8.284	PASS
3	16745004	5.27e-09	Cu65	Potri.003G154000	16736095	16736826	+	3'	8178	3_16745004	8.27819	PASS	Potri.003G154000	-	-	-	-	-	-	-	-	-	-	-	-	-	-	-	-	-	-	-
3	16745004	5.27e-09	Cu65	Potri.003G154100	16737920	16744954	+	3'	50	3_16745004	8.27819	PASS	Potri.003G154100	-	-	-	-	-	-	-	-	-	-	-	-	-	-	-	-	-	-	-
3	16745004	5.27e-09	Cu65	Potri.003G154200	16746509	16747332	-	5'	1505	3_16745004	8.27819	PASS	Potri.003G154200	-	-	-	-	-	-	-	-	-	-	-	-	-	-	-	-	-	-	-
3	16745004	5.27e-09	Cu65	Potri.003G154300	16746509	16753982	+	5'	1505	3_16745004	8.27819	PASS
1	2332	6.11e-09	Na23	Potri.001G000100	1660	2502	-	in gene	0	1_2332	8.21396	-
1	2332	6.11e-09	Na23	Potri.001G000200	2906	6646	-	5'	574	1_2332	8.21396	-	Potri.001G000200	PF14111	PTHR31286,PTHR31286:SF2	-	3.5.1.28,3.2.1.96	-	-	-	AT2G01050	-	zinc ion binding;nucleic acid binding	zinc ion binding;nucleic acid binding	-	zinc ion binding;nucleic acid binding; FUNCTIONS IN: zinc ion binding, nucleic acid binding; INVOLVED IN: biological_process unknown; LOCATED IN: cellular_component unknown; CONTAINS InterPro DOMAIN/s: Zinc finger, CCHC-type (InterPro:IPR001878); BEST Arabidopsis thaliana protein match is: unknown protein (TAIR:AT3G31430.1); Has 369 Blast hits to 365 proteins in 15 species: Archae - 0; Bacteria -…	PF14392,PF14111	PTHR31286,PTHR31286:SF7	-	-	-	-
1	2332	6.11e-09	Na23	Potri.001G000400	8391	12483	-	5'	6059	1_2332	8.21396	-	Potri.001G000400	PF11779	PTHR33727	-	-	-	-	-	AT2G30942	-	Protein of unknown function (DUF3317)	Protein of unknown function (DUF3317)	-	Protein of unknown function (DUF3317); BEST Arabidopsis thaliana protein match is: Protein of unknown function (DUF3317) (TAIR:AT1G06515.2); Has 35333 Blast hits to 34131 proteins in 2444 species: Archae - 798; Bacteria - 22429; Metazoa - 974; Fungi - 991; Plants - 531; Viruses - 0; Other Eukaryotes - 9610 (source: NCBI BLink).	PF11779	PTHR33727	-	-	-	-
1	2332	6.11e-09	Na23	Potri.001G000300	8391	8860	+	5'	6059	1_2332	8.21396	-	Potri.001G000300	-	-	-	-	-	-	-	-	-	-	-	-	-	-	-	-	-	-	-
4	17446675	6.17e-09	Cu65	Potri.004G152400	17421330	17438179	-	3'	8496	4_17446675	8.20971	-	Potri.004G152400	PF00613,PF00454	PTHR10048,PTHR10048:SF15	-	2.7.1.67	K00888	GO:0016773,GO:0048015,GO:0046854	-	AT1G49340	ATPI4K ALPHA	Phosphatidylinositol 3- and 4-kinase family protein	Phosphatidylinositol 3- and 4-kinase family protein	Encodes a phosphatidylinositol 4-kinase that is expressed in inflorescences and shoots.	ATPI4K ALPHA; FUNCTIONS IN: 1-phosphatidylinositol 4-kinase activity, inositol or phosphatidylinositol kinase activity; INVOLVED IN: protein amino acid phosphorylation; LOCATED IN: plasma membrane; EXPRESSED IN: shoot, male gametophyte, flower, pollen tube; EXPRESSED DURING: L mature pollen stage, M germinated pollen stage; CONTAINS InterPro DOMAIN/s: Phosphoinositide 3-kinase, accessory (PIK) do…	PF00613,PF00454	PTHR10048,PTHR10048:SF15	-	2.7.1.67	K00888	GO:0016773,GO:0048015,GO:0046854
4	17446675	6.17e-09	Cu65	Potri.004G152500	17442848	17443057	-	3'	3618	4_17446675	8.20971	-	Potri.004G152500	-	PTHR34272	-	-	-	-	-	AT2G16190	-	-	-	-	BEST Arabidopsis thaliana protein match is: hydroxyproline-rich glycoprotein family protein (TAIR:AT1G49330.1); Has 77 Blast hits to 77 proteins in 25 species: Archae - 0; Bacteria - 0; Metazoa - 6; Fungi - 13; Plants - 56; Viruses - 0; Other Eukaryotes - 2 (source: NCBI BLink).	-	-	-	-	-	-
4	17446675	6.17e-09	Cu65	Potri.004G152600	17446134	17447150	-	in gene	0	4_17446675	8.20971	-	Potri.004G152600	-	PTHR34272	-	-	-	-	-	AT1G49330	-	hydroxyproline-rich glycoprotein family protein	hydroxyproline-rich glycoprotein family protein	-	hydroxyproline-rich glycoprotein family protein; BEST Arabidopsis thaliana protein match is: unknown protein (TAIR:AT2G16190.1); Has 882 Blast hits to 731 proteins in 140 species: Archae - 0; Bacteria - 49; Metazoa - 218; Fungi - 71; Plants - 381; Viruses - 66; Other Eukaryotes - 97 (source: NCBI BLink).	-	PTHR34272	-	-	-	-
4	17446675	6.17e-09	Cu65	Potri.004G152700	17450768	17452288	+	5'	4093	4_17446675	8.20971	-	Potri.004G152700	-	PTHR35989,PTHR35989:SF1	-	-	-	-	-	AT1G11760	MED32	-	-	-	MED32; Has 41 Blast hits to 40 proteins in 14 species: Archae - 0; Bacteria - 0; Metazoa - 0; Fungi - 0; Plants - 41; Viruses - 0; Other Eukaryotes - 0 (source: NCBI BLink).	-	PTHR35989,PTHR35989:SF1	-	-	-	-
6	25343698	6.46e-09	Mo98	Potri.006G245800	25329275	25333698	-	3'	10000	6_25343698	8.18977	-	Potri.006G245800	PF04434	PTHR33977,PTHR33977:SF2	-	-	-	GO:0008270	-	AT1G60560	-	SWIM zinc finger family protein	SWIM zinc finger family protein	-	SWIM zinc finger family protein; FUNCTIONS IN: zinc ion binding; INVOLVED IN: biological_process unknown; LOCATED IN: cellular_component unknown; EXPRESSED IN: 22 plant structures; EXPRESSED DURING: 13 growth stages; CONTAINS InterPro DOMAIN/s: Zinc finger, SWIM-type (InterPro:IPR007527); BEST Arabidopsis thaliana protein match is: zinc ion binding (TAIR:AT4G13970.1); Has 86 Blast hits to 86 prot…	PF04434	PTHR33977,PTHR33977:SF2	-	-	-	GO:0008270
6	25343698	6.46e-09	Mo98	Potri.006G245900	25337833	25339670	-	3'	4028	6_25343698	8.18977	-	Potri.006G245900	PF16983	PTHR31970,PTHR31970:SF3	-	-	-	-	-	AT2G25680	MOT1	molybdate transporter 1	molybdate transporter 1	Encodes a high-affinity molybdate transporter. Mutant has reduced concentrations of molybdate in roots and shoots, and reduced shoot and root length when growing on Mo-limited medium.	molybdate transporter 1 (MOT1); FUNCTIONS IN: molybdate ion transmembrane transporter activity, sulfate transmembrane transporter activity; INVOLVED IN: molybdate ion transport; LOCATED IN: mitochondrion, vacuole; EXPRESSED IN: 13 plant structures; EXPRESSED DURING: LP.04 four leaves visible, 4 anthesis, petal differentiation and expansion stage; BEST Arabidopsis thaliana protein match is: sulfat…	PF16983	PTHR31970,PTHR31970:SF3	-	-	-	-
6	25343698	6.46e-09	Mo98	Potri.006G246000	25345115	25347031	+	5'	1417	6_25343698	8.18977	-	Potri.006G246000	PF16983	PTHR31970,PTHR31970:SF3	-	-	-	-	-	AT2G25680	MOT1	molybdate transporter 1	molybdate transporter 1	Encodes a high-affinity molybdate transporter. Mutant has reduced concentrations of molybdate in roots and shoots, and reduced shoot and root length when growing on Mo-limited medium.	molybdate transporter 1 (MOT1); FUNCTIONS IN: molybdate ion transmembrane transporter activity, sulfate transmembrane transporter activity; INVOLVED IN: molybdate ion transport; LOCATED IN: mitochondrion, vacuole; EXPRESSED IN: 13 plant structures; EXPRESSED DURING: LP.04 four leaves visible, 4 anthesis, petal differentiation and expansion stage; BEST Arabidopsis thaliana protein match is: sulfat…	PF16983	PTHR31970,PTHR31970:SF3	-	-	-	-
6	25343698	6.46e-09	Mo98	Potri.006G246100	25350095	25356024	-	5'	6397	6_25343698	8.18977	-	Potri.006G246100	PF01412	PTHR23180,PTHR23180:SF266	KOG0702	-	-	GO:0005096	-	AT4G32630	-	ArfGap/RecO-like zinc finger domain-containing protein	ArfGap/RecO-like zinc finger domain-containing protein	-	ArfGap/RecO-like zinc finger domain-containing protein; FUNCTIONS IN: ARF GTPase activator activity, zinc ion binding; INVOLVED IN: regulation of ARF GTPase activity; LOCATED IN: cellular_component unknown; EXPRESSED IN: 18 plant structures; EXPRESSED DURING: 10 growth stages; CONTAINS InterPro DOMAIN/s: Arf GTPase activating protein (InterPro:IPR001164); BEST Arabidopsis thaliana protein match i…	PF01412	PTHR23180,PTHR23180:SF266	-	-	-	GO:0005096
14	18643876	7.5e-09	S34	Potri.014G196400	18629509	18634061	-	3'	9815	14_18643876	8.12494	-	Potri.014G196400	PF02545	PTHR11746,PTHR11746:SF89	KOG1509	-	K06287	GO:0005737	-	AT5G42770	-	Maf-like protein	Maf-like protein	-	Maf-like protein; FUNCTIONS IN: molecular_function unknown; INVOLVED IN: biological_process unknown; LOCATED IN: cytoplasm; CONTAINS InterPro DOMAIN/s: Maf-like protein (InterPro:IPR003697); BEST Arabidopsis thaliana protein match is: Maf-like protein (TAIR:AT5G66550.1).	PF02545	PTHR11746,PTHR11746:SF89	KOG1509	-	K06287	GO:0005737
14	18643876	7.5e-09	S34	Potri.014G196600	18639324	18643597	+	3'	279	14_18643876	8.12494	-	Potri.014G196600	PF00560,PF07714,PF13855	PTHR27000,PTHR27000:SF96	KOG1187	2.7.11.1	-	GO:0005515,GO:0006468,GO:0004672	-	AT2G16250	-	Leucine-rich repeat protein kinase family protein	Leucine-rich repeat protein kinase family protein	-	Leucine-rich repeat protein kinase family protein; FUNCTIONS IN: protein serine/threonine kinase activity, protein kinase activity, ATP binding; INVOLVED IN: transmembrane receptor protein tyrosine kinase signaling pathway, protein amino acid phosphorylation; LOCATED IN: plasma membrane, plant-type cell wall; EXPRESSED IN: 21 plant structures; EXPRESSED DURING: 10 growth stages; CONTAINS InterPro…	PF13855,PF07714	PTHR27000,PTHR27000:SF96	KOG1187	2.7.11.1	-	GO:0005515,GO:0006468,GO:0004672
38	354800	7.81e-09	Cu65	Potri.T040400	345996	347719	+	3'	7081	38_354800	8.10735	-	Potri.T040400	PF00544	PTHR31683,PTHR31683:SF18	-	4.2.2.2	-	-	-	AT1G11920	-	Pectin lyase-like superfamily protein	Pectin lyase-like superfamily protein	-	Pectin lyase-like superfamily protein; FUNCTIONS IN: lyase activity, pectate lyase activity; INVOLVED IN: biological_process unknown; LOCATED IN: endomembrane system; EXPRESSED IN: flower; EXPRESSED DURING: petal differentiation and expansion stage; CONTAINS InterPro DOMAIN/s: Pectin lyase fold/virulence factor (InterPro:IPR011050), AmbAllergen (InterPro:IPR018082), Pectate lyase/Amb allergen (In…	PF00544	PTHR31683,PTHR31683:SF18	-	4.2.2.2	K01728	-
38	354800	7.81e-09	Cu65	Potri.T040500	348553	349979	-	3'	4821	38_354800	8.10735	-	Potri.T040500	PF14380,PF13947	PTHR33355,PTHR33355:SF5	-	-	-	GO:0030247	-	AT1G11915	-	-	-	-	unknown protein; FUNCTIONS IN: molecular_function unknown; INVOLVED IN: biological_process unknown; LOCATED IN: endomembrane system; EXPRESSED IN: root; BEST Arabidopsis thaliana protein match is: unknown protein (TAIR:AT3G17350.1); Has 261 Blast hits to 261 proteins in 13 species: Archae - 0; Bacteria - 0; Metazoa - 0; Fungi - 0; Plants - 261; Viruses - 0; Other Eukaryotes - 0 (source: NCBI BLin…	PF13947	PTHR33355,PTHR33355:SF5	-	-	-	GO:0030247
6	10715393	7.98e-09	Al27	Potri.006G130500	10704874	10707474	-	3'	7919	6_10715393	8.098	-	Potri.006G130500	-	PTHR33448,PTHR33448:SF4	-	-	-	-	-	AT5G03110	-	-	-	-	FUNCTIONS IN: molecular_function unknown; INVOLVED IN: biological_process unknown; LOCATED IN: plasma membrane; BEST Arabidopsis thaliana protein match is: protamine P1 family protein (TAIR:AT2G37100.1); Has 81 Blast hits to 73 proteins in 9 species: Archae - 0; Bacteria - 0; Metazoa - 0; Fungi - 0; Plants - 81; Viruses - 0; Other Eukaryotes - 0 (source: NCBI BLink).	-	PTHR33448,PTHR33448:SF4	-	-	-	-
6	10715393	7.98e-09	Al27	Potri.006G130600	10710654	10714708	-	3'	685	6_10715393	8.098	-	Potri.006G130600	-	PTHR33476	-	-	-	-	-	AT3G09730	-	-	-	-	unknown protein; FUNCTIONS IN: molecular_function unknown; INVOLVED IN: biological_process unknown; EXPRESSED IN: 18 plant structures; EXPRESSED DURING: 9 growth stages.	-	PTHR33476	-	-	-	-
6	10715393	7.98e-09	Al27	Potri.006G130700	10717085	10720927	-	5'	1692	6_10715393	8.098	-	Potri.006G130700	PF01569	PTHR11247	KOG3146	3.1.3.4	K07252	-	-	AT5G03080	-	Phosphatidic acid phosphatase (PAP2) family protein	Phosphatidic acid phosphatase (PAP2) family protein	Encodes a phosphatidic acid phosphatase that can be detected in chloroplast membrane fractions. This gene, LPPgamma appears to be more important for diacylglycerol formation than LPPepsilon1 and LPPepsilon2 in the plastids. Heterozygous lppgamma mutants produce pollen that have defects in pollen tube germination and no homozygous mutants have been recovered.	Phosphatidic acid phosphatase (PAP2) family protein; FUNCTIONS IN: catalytic activity; INVOLVED IN: biological_process unknown; LOCATED IN: membrane; EXPRESSED IN: 23 plant structures; EXPRESSED DURING: 14 growth stages; CONTAINS InterPro DOMAIN/s: Phosphatidic acid phosphatase type 2/haloperoxidase (InterPro:IPR000326); Has 881 Blast hits to 875 proteins in 378 species: Archae - 15; Bacteria - 4…	PF01569	PTHR11247	KOG3146	3.1.3.4	K07252	-
6	10715393	7.98e-09	Al27	Potri.006G130800	10725099	10728457	+	5'	9706	6_10715393	8.098	-	Potri.006G130800	PF00514	PTHR23316,PTHR23316:SF1	-	-	-	GO:0005515	-	AT5G03070	IMPA-9	importin alpha isoform 9	importin alpha isoform 9	Putative importin alpha isoform. When overexpressed can rescue the impa-4 decreased transformation susceptibility phenotype.	importin alpha isoform 9 (IMPA-9); FUNCTIONS IN: binding; INVOLVED IN: biological_process unknown; LOCATED IN: chloroplast; EXPRESSED IN: 24 plant structures; EXPRESSED DURING: 13 growth stages; CONTAINS InterPro DOMAIN/s: Armadillo-like helical (InterPro:IPR011989), Armadillo (InterPro:IPR000225), Armadillo-type fold (InterPro:IPR016024); BEST Arabidopsis thaliana protein match is: importin alph…	PF00514	PTHR23316,PTHR23316:SF1	KOG0166	-	-	GO:0005515
10	6768289	8.16e-09	Al27	Potri.010G040100	6767103	6773826	+	in gene	0	10_6768289	8.08831	-	Potri.010G040100	PF07059	PTHR31558,PTHR31558:SF3	-	-	-	-	-	AT1G10410	-	Protein of unknown function (DUF1336)	Protein of unknown function (DUF1336)	-	Protein of unknown function (DUF1336); INVOLVED IN: N-terminal protein myristoylation; LOCATED IN: chloroplast; EXPRESSED IN: 24 plant structures; EXPRESSED DURING: 15 growth stages; CONTAINS InterPro DOMAIN/s: Protein of unknown function DUF1336 (InterPro:IPR009769); BEST Arabidopsis thaliana protein match is: Protein of unknown function (DUF1336) (TAIR:AT1G59650.1); Has 292 Blast hits to 292 pr…	PF07059	PTHR31558,PTHR31558:SF3	-	-	-	-
10	6768289	8.16e-09	Al27	Potri.010G040200	6773836	6776147	-	5'	5547	10_6768289	8.08831	-	Potri.010G040200	PF00560,PF13855	PTHR27000,PTHR27000:SF29	KOG0472	2.7.11.1	-	GO:0005515	-	AT4G20140	GSO1	Leucine-rich repeat transmembrane protein kinase	Leucine-rich repeat transmembrane protein kinase	Encodes GASSHO1 (GSO1), a putative leucine-rich repeat transmembrane-type receptor kinase. GSO1 and a homolog GSO2 (At5g44700) are required for the formation of a normal epidermal surface during embryogenesis.	GASSHO1 (GSO1); FUNCTIONS IN: protein serine/threonine kinase activity, protein kinase activity, ATP binding; INVOLVED IN: protein amino acid phosphorylation, transmembrane receptor protein tyrosine kinase signaling pathway, embryo development, epidermis development; LOCATED IN: endomembrane system; EXPRESSED IN: 13 plant structures; EXPRESSED DURING: 8 growth stages; CONTAINS InterPro DOMAIN/s: …	PF08263,PF00560,PF00069,PF13855	PTHR27000,PTHR27000:SF86	KOG1187	2.7.11.1	-	GO:0005515,GO:0006468,GO:0005524,GO:0004672
5	1056886	9.06e-09	Cu65	Potri.005G013400	1044581	1047126	+	3'	9760	5_1056886	8.04287	-	Potri.005G013400	PF13855	PTHR27004,PTHR27004:SF11	KOG0472	-	-	GO:0005515	-	AT1G74190	AtRLP15	receptor like protein 15	receptor like protein 15	-	receptor like protein 15 (RLP15); INVOLVED IN: signal transduction; LOCATED IN: endomembrane system; CONTAINS InterPro DOMAIN/s: Leucine-rich repeat-containing N-terminal domain, type 2 (InterPro:IPR013210), Leucine-rich repeat (InterPro:IPR001611); BEST Arabidopsis thaliana protein match is: receptor like protein 13 (TAIR:AT1G74170.1); Has 128946 Blast hits to 31204 proteins in 1189 species: Arc…	PF08263,PF00560,PF13855	PTHR27004,PTHR27004:SF29	KOG0472	2.7.11.1	-	GO:0005515
5	1056886	9.06e-09	Cu65	Potri.005G013500	1055612	1056153	-	3'	733	5_1056886	8.04287	-	Potri.005G013500	-	-	-	-	-	-	-	-	-	-	-	-	-	-	-	-	-	-	-
5	1056886	9.06e-09	Cu65	Potri.005G013600	1062080	1064089	+	5'	5194	5_1056886	8.04287	-	Potri.005G013600	PF14226,PF03171	PTHR10209,PTHR10209:SF124	KOG0143	1.14.11.11,1.14.11.14	-	GO:0055114,GO:0016491	-	AT4G10500	-	2-oxoglutarate (2OG) and Fe(II)-dependent oxygenase superfamily protein	2-oxoglutarate (2OG) and Fe(II)-dependent oxygenase superfamily protein	-	2-oxoglutarate (2OG) and Fe(II)-dependent oxygenase superfamily protein; FUNCTIONS IN: oxidoreductase activity, acting on paired donors, with incorporation or reduction of molecular oxygen, 2-oxoglutarate as one donor, and incorporation of one atom each of oxygen into both donors, oxidoreductase activity; INVOLVED IN: secondary metabolic process; EXPRESSED IN: 12 plant structures; EXPRESSED DURIN…	PF14226,PF03171	PTHR10209,PTHR10209:SF196	KOG0143	1.14.11.9	-	GO:0055114,GO:0016491
4	17441780	9.75e-09	Cu65	Potri.004G152400	17421330	17438179	-	3'	3601	4_17441780	8.011	-	Potri.004G152400	PF00613,PF00454	PTHR10048,PTHR10048:SF15	-	2.7.1.67	K00888	GO:0016773,GO:0048015,GO:0046854	-	AT1G49340	ATPI4K ALPHA	Phosphatidylinositol 3- and 4-kinase family protein	Phosphatidylinositol 3- and 4-kinase family protein	Encodes a phosphatidylinositol 4-kinase that is expressed in inflorescences and shoots.	ATPI4K ALPHA; FUNCTIONS IN: 1-phosphatidylinositol 4-kinase activity, inositol or phosphatidylinositol kinase activity; INVOLVED IN: protein amino acid phosphorylation; LOCATED IN: plasma membrane; EXPRESSED IN: shoot, male gametophyte, flower, pollen tube; EXPRESSED DURING: L mature pollen stage, M germinated pollen stage; CONTAINS InterPro DOMAIN/s: Phosphoinositide 3-kinase, accessory (PIK) do…	PF00613,PF00454	PTHR10048,PTHR10048:SF15	-	2.7.1.67	K00888	GO:0016773,GO:0048015,GO:0046854
4	17441780	9.75e-09	Cu65	Potri.004G152500	17442848	17443057	-	5'	1068	4_17441780	8.011	-	Potri.004G152500	-	PTHR34272	-	-	-	-	-	AT2G16190	-	-	-	-	BEST Arabidopsis thaliana protein match is: hydroxyproline-rich glycoprotein family protein (TAIR:AT1G49330.1); Has 77 Blast hits to 77 proteins in 25 species: Archae - 0; Bacteria - 0; Metazoa - 6; Fungi - 13; Plants - 56; Viruses - 0; Other Eukaryotes - 2 (source: NCBI BLink).	-	-	-	-	-	-
4	17441780	9.75e-09	Cu65	Potri.004G152600	17446134	17447150	-	5'	4354	4_17441780	8.011	-	Potri.004G152600	-	PTHR34272	-	-	-	-	-	AT1G49330	-	hydroxyproline-rich glycoprotein family protein	hydroxyproline-rich glycoprotein family protein	-	hydroxyproline-rich glycoprotein family protein; BEST Arabidopsis thaliana protein match is: unknown protein (TAIR:AT2G16190.1); Has 882 Blast hits to 731 proteins in 140 species: Archae - 0; Bacteria - 49; Metazoa - 218; Fungi - 71; Plants - 381; Viruses - 66; Other Eukaryotes - 97 (source: NCBI BLink).	-	PTHR34272	-	-	-	-
4	17441780	9.75e-09	Cu65	Potri.004G152700	17450768	17452288	+	5'	8988	4_17441780	8.011	-	Potri.004G152700	-	PTHR35989,PTHR35989:SF1	-	-	-	-	-	AT1G11760	MED32	-	-	-	MED32; Has 41 Blast hits to 40 proteins in 14 species: Archae - 0; Bacteria - 0; Metazoa - 0; Fungi - 0; Plants - 41; Viruses - 0; Other Eukaryotes - 0 (source: NCBI BLink).	-	PTHR35989,PTHR35989:SF1	-	-	-	-
4	17443251	9.75e-09	Cu65	Potri.004G152400	17421330	17438179	-	3'	5072	4_17443251	8.011	-	Potri.004G152400	PF00613,PF00454	PTHR10048,PTHR10048:SF15	-	2.7.1.67	K00888	GO:0016773,GO:0048015,GO:0046854	-	AT1G49340	ATPI4K ALPHA	Phosphatidylinositol 3- and 4-kinase family protein	Phosphatidylinositol 3- and 4-kinase family protein	Encodes a phosphatidylinositol 4-kinase that is expressed in inflorescences and shoots.	ATPI4K ALPHA; FUNCTIONS IN: 1-phosphatidylinositol 4-kinase activity, inositol or phosphatidylinositol kinase activity; INVOLVED IN: protein amino acid phosphorylation; LOCATED IN: plasma membrane; EXPRESSED IN: shoot, male gametophyte, flower, pollen tube; EXPRESSED DURING: L mature pollen stage, M germinated pollen stage; CONTAINS InterPro DOMAIN/s: Phosphoinositide 3-kinase, accessory (PIK) do…	PF00613,PF00454	PTHR10048,PTHR10048:SF15	-	2.7.1.67	K00888	GO:0016773,GO:0048015,GO:0046854
4	17443251	9.75e-09	Cu65	Potri.004G152500	17442848	17443057	-	3'	194	4_17443251	8.011	-	Potri.004G152500	-	PTHR34272	-	-	-	-	-	AT2G16190	-	-	-	-	BEST Arabidopsis thaliana protein match is: hydroxyproline-rich glycoprotein family protein (TAIR:AT1G49330.1); Has 77 Blast hits to 77 proteins in 25 species: Archae - 0; Bacteria - 0; Metazoa - 6; Fungi - 13; Plants - 56; Viruses - 0; Other Eukaryotes - 2 (source: NCBI BLink).	-	-	-	-	-	-
4	17443251	9.75e-09	Cu65	Potri.004G152600	17446134	17447150	-	5'	2883	4_17443251	8.011	-	Potri.004G152600	-	PTHR34272	-	-	-	-	-	AT1G49330	-	hydroxyproline-rich glycoprotein family protein	hydroxyproline-rich glycoprotein family protein	-	hydroxyproline-rich glycoprotein family protein; BEST Arabidopsis thaliana protein match is: unknown protein (TAIR:AT2G16190.1); Has 882 Blast hits to 731 proteins in 140 species: Archae - 0; Bacteria - 49; Metazoa - 218; Fungi - 71; Plants - 381; Viruses - 66; Other Eukaryotes - 97 (source: NCBI BLink).	-	PTHR34272	-	-	-	-
4	17443251	9.75e-09	Cu65	Potri.004G152700	17450768	17452288	+	5'	7517	4_17443251	8.011	-	Potri.004G152700	-	PTHR35989,PTHR35989:SF1	-	-	-	-	-	AT1G11760	MED32	-	-	-	MED32; Has 41 Blast hits to 40 proteins in 14 species: Archae - 0; Bacteria - 0; Metazoa - 0; Fungi - 0; Plants - 41; Viruses - 0; Other Eukaryotes - 0 (source: NCBI BLink).	-	PTHR35989,PTHR35989:SF1	-	-	-	-
4	17444142	9.75e-09	Cu65	Potri.004G152400	17421330	17438179	-	3'	5963	4_17444142	8.011	-	Potri.004G152400	PF00613,PF00454	PTHR10048,PTHR10048:SF15	-	2.7.1.67	K00888	GO:0016773,GO:0048015,GO:0046854	-	AT1G49340	ATPI4K ALPHA	Phosphatidylinositol 3- and 4-kinase family protein	Phosphatidylinositol 3- and 4-kinase family protein	Encodes a phosphatidylinositol 4-kinase that is expressed in inflorescences and shoots.	ATPI4K ALPHA; FUNCTIONS IN: 1-phosphatidylinositol 4-kinase activity, inositol or phosphatidylinositol kinase activity; INVOLVED IN: protein amino acid phosphorylation; LOCATED IN: plasma membrane; EXPRESSED IN: shoot, male gametophyte, flower, pollen tube; EXPRESSED DURING: L mature pollen stage, M germinated pollen stage; CONTAINS InterPro DOMAIN/s: Phosphoinositide 3-kinase, accessory (PIK) do…	PF00613,PF00454	PTHR10048,PTHR10048:SF15	-	2.7.1.67	K00888	GO:0016773,GO:0048015,GO:0046854
4	17444142	9.75e-09	Cu65	Potri.004G152500	17442848	17443057	-	3'	1085	4_17444142	8.011	-	Potri.004G152500	-	PTHR34272	-	-	-	-	-	AT2G16190	-	-	-	-	BEST Arabidopsis thaliana protein match is: hydroxyproline-rich glycoprotein family protein (TAIR:AT1G49330.1); Has 77 Blast hits to 77 proteins in 25 species: Archae - 0; Bacteria - 0; Metazoa - 6; Fungi - 13; Plants - 56; Viruses - 0; Other Eukaryotes - 2 (source: NCBI BLink).	-	-	-	-	-	-
4	17444142	9.75e-09	Cu65	Potri.004G152600	17446134	17447150	-	5'	1992	4_17444142	8.011	-	Potri.004G152600	-	PTHR34272	-	-	-	-	-	AT1G49330	-	hydroxyproline-rich glycoprotein family protein	hydroxyproline-rich glycoprotein family protein	-	hydroxyproline-rich glycoprotein family protein; BEST Arabidopsis thaliana protein match is: unknown protein (TAIR:AT2G16190.1); Has 882 Blast hits to 731 proteins in 140 species: Archae - 0; Bacteria - 49; Metazoa - 218; Fungi - 71; Plants - 381; Viruses - 66; Other Eukaryotes - 97 (source: NCBI BLink).	-	PTHR34272	-	-	-	-
4	17444142	9.75e-09	Cu65	Potri.004G152700	17450768	17452288	+	5'	6626	4_17444142	8.011	-	Potri.004G152700	-	PTHR35989,PTHR35989:SF1	-	-	-	-	-	AT1G11760	MED32	-	-	-	MED32; Has 41 Blast hits to 40 proteins in 14 species: Archae - 0; Bacteria - 0; Metazoa - 0; Fungi - 0; Plants - 41; Viruses - 0; Other Eukaryotes - 0 (source: NCBI BLink).	-	PTHR35989,PTHR35989:SF1	-	-	-	-
6	2644	9.92e-09	Na23	Potri.006G000100	4805	5818	-	5'	2161	6_2644	8.00349	-
1	12738	1.05e-08	Na23	Potri.001G000200	2906	6646	-	3'	6092	1_12738	7.97881	-	Potri.001G000200	PF14111	PTHR31286,PTHR31286:SF2	-	3.5.1.28,3.2.1.96	-	-	-	AT2G01050	-	zinc ion binding;nucleic acid binding	zinc ion binding;nucleic acid binding	-	zinc ion binding;nucleic acid binding; FUNCTIONS IN: zinc ion binding, nucleic acid binding; INVOLVED IN: biological_process unknown; LOCATED IN: cellular_component unknown; CONTAINS InterPro DOMAIN/s: Zinc finger, CCHC-type (InterPro:IPR001878); BEST Arabidopsis thaliana protein match is: unknown protein (TAIR:AT3G31430.1); Has 369 Blast hits to 365 proteins in 15 species: Archae - 0; Bacteria -…	PF14392,PF14111	PTHR31286,PTHR31286:SF7	-	-	-	-
1	12738	1.05e-08	Na23	Potri.001G000400	8391	12483	-	3'	255	1_12738	7.97881	-	Potri.001G000400	PF11779	PTHR33727	-	-	-	-	-	AT2G30942	-	Protein of unknown function (DUF3317)	Protein of unknown function (DUF3317)	-	Protein of unknown function (DUF3317); BEST Arabidopsis thaliana protein match is: Protein of unknown function (DUF3317) (TAIR:AT1G06515.2); Has 35333 Blast hits to 34131 proteins in 2444 species: Archae - 798; Bacteria - 22429; Metazoa - 974; Fungi - 991; Plants - 531; Viruses - 0; Other Eukaryotes - 9610 (source: NCBI BLink).	PF11779	PTHR33727	-	-	-	-
1	12738	1.05e-08	Na23	Potri.001G000300	8391	8860	+	3'	3878	1_12738	7.97881	-	Potri.001G000300	-	-	-	-	-	-	-	-	-	-	-	-	-	-	-	-	-	-	-
6	10715946	1.07e-08	Al27	Potri.006G130500	10704874	10707474	-	3'	8472	6_10715946	7.97062	-	Potri.006G130500	-	PTHR33448,PTHR33448:SF4	-	-	-	-	-	AT5G03110	-	-	-	-	FUNCTIONS IN: molecular_function unknown; INVOLVED IN: biological_process unknown; LOCATED IN: plasma membrane; BEST Arabidopsis thaliana protein match is: protamine P1 family protein (TAIR:AT2G37100.1); Has 81 Blast hits to 73 proteins in 9 species: Archae - 0; Bacteria - 0; Metazoa - 0; Fungi - 0; Plants - 81; Viruses - 0; Other Eukaryotes - 0 (source: NCBI BLink).	-	PTHR33448,PTHR33448:SF4	-	-	-	-
6	10715946	1.07e-08	Al27	Potri.006G130600	10710654	10714708	-	3'	1238	6_10715946	7.97062	-	Potri.006G130600	-	PTHR33476	-	-	-	-	-	AT3G09730	-	-	-	-	unknown protein; FUNCTIONS IN: molecular_function unknown; INVOLVED IN: biological_process unknown; EXPRESSED IN: 18 plant structures; EXPRESSED DURING: 9 growth stages.	-	PTHR33476	-	-	-	-
6	10715946	1.07e-08	Al27	Potri.006G130700	10717085	10720927	-	5'	1139	6_10715946	7.97062	-	Potri.006G130700	PF01569	PTHR11247	KOG3146	3.1.3.4	K07252	-	-	AT5G03080	-	Phosphatidic acid phosphatase (PAP2) family protein	Phosphatidic acid phosphatase (PAP2) family protein	Encodes a phosphatidic acid phosphatase that can be detected in chloroplast membrane fractions. This gene, LPPgamma appears to be more important for diacylglycerol formation than LPPepsilon1 and LPPepsilon2 in the plastids. Heterozygous lppgamma mutants produce pollen that have defects in pollen tube germination and no homozygous mutants have been recovered.	Phosphatidic acid phosphatase (PAP2) family protein; FUNCTIONS IN: catalytic activity; INVOLVED IN: biological_process unknown; LOCATED IN: membrane; EXPRESSED IN: 23 plant structures; EXPRESSED DURING: 14 growth stages; CONTAINS InterPro DOMAIN/s: Phosphatidic acid phosphatase type 2/haloperoxidase (InterPro:IPR000326); Has 881 Blast hits to 875 proteins in 378 species: Archae - 15; Bacteria - 4…	PF01569	PTHR11247	KOG3146	3.1.3.4	K07252	-
6	10715946	1.07e-08	Al27	Potri.006G130800	10725099	10728457	+	5'	9153	6_10715946	7.97062	-	Potri.006G130800	PF00514	PTHR23316,PTHR23316:SF1	-	-	-	GO:0005515	-	AT5G03070	IMPA-9	importin alpha isoform 9	importin alpha isoform 9	Putative importin alpha isoform. When overexpressed can rescue the impa-4 decreased transformation susceptibility phenotype.	importin alpha isoform 9 (IMPA-9); FUNCTIONS IN: binding; INVOLVED IN: biological_process unknown; LOCATED IN: chloroplast; EXPRESSED IN: 24 plant structures; EXPRESSED DURING: 13 growth stages; CONTAINS InterPro DOMAIN/s: Armadillo-like helical (InterPro:IPR011989), Armadillo (InterPro:IPR000225), Armadillo-type fold (InterPro:IPR016024); BEST Arabidopsis thaliana protein match is: importin alph…	PF00514	PTHR23316,PTHR23316:SF1	KOG0166	-	-	GO:0005515
13	12688016	1.08e-08	Al27	Potri.013G113500	12677050	12680616	-	3'	7400	13_12688016	7.96658	-	Potri.013G113500	PF02536	PTHR13068,PTHR13068:SF26	-	-	-	GO:0006355,GO:0005739,GO:0003690	-	AT4G09620	-	Mitochondrial transcription termination factor family protein	Mitochondrial transcription termination factor family protein	-	Mitochondrial transcription termination factor family protein; FUNCTIONS IN: molecular_function unknown; INVOLVED IN: biological_process unknown; LOCATED IN: chloroplast; EXPRESSED IN: 24 plant structures; EXPRESSED DURING: 15 growth stages; CONTAINS InterPro DOMAIN/s: Mitochodrial transcription termination factor-related (InterPro:IPR003690); Has 234 Blast hits to 198 proteins in 25 species: Arc…	PF02536	PTHR13068,PTHR13068:SF26	-	-	-	GO:0006355,GO:0005739,GO:0003690
13	12688016	1.08e-08	Al27	Potri.013G113600	12690046	12690426	-	5'	2030	13_12688016	7.96658	-	Potri.013G113600	-	PTHR34453	-	-	-	-	-	AT5G52605	-	Defensin-like (DEFL) family protein	Defensin-like (DEFL) family protein	Encodes a defensin-like (DEFL) family protein.	Defensin-like (DEFL) family protein; LOCATED IN: endomembrane system; BEST Arabidopsis thaliana protein match is: Defensin-like (DEFL) family protein (TAIR:AT4G14276.1); Has 48 Blast hits to 46 proteins in 4 species: Archae - 0; Bacteria - 0; Metazoa - 0; Fungi - 0; Plants - 48; Viruses - 0; Other Eukaryotes - 0 (source: NCBI BLink).	-	PTHR34453	-	-	-	-
13	12688016	1.08e-08	Al27	Potri.013G113700	12693461	12700190	+	5'	5445	13_12688016	7.96658	-	Potri.013G113700	PF04765	PTHR12956,PTHR12956:SF24	-	-	-	-	-	AT1G34550	EMB2756	Protein of unknown function (DUF616)	Protein of unknown function (DUF616)	-	EMBRYO DEFECTIVE 2756 (EMB2756); INVOLVED IN: response to cadmium ion, embryo development ending in seed dormancy; EXPRESSED IN: 25 plant structures; EXPRESSED DURING: 13 growth stages; CONTAINS InterPro DOMAIN/s: Protein of unknown function DUF616 (InterPro:IPR006852); BEST Arabidopsis thaliana protein match is: Protein of unknown function (DUF616) (TAIR:AT4G09630.1); Has 593 Blast hits to 590 p…	PF04765	PTHR12956,PTHR12956:SF24	-	-	-	-
13	10985852	1.11e-08	Cu65	Potri.013G099800	10989291	10995442	+	5'	3439	13_10985852	7.95468	-	Potri.013G099800	PF00013	PTHR10288,PTHR10288:SF145	KOG1676	-	K13210	GO:0003723	-	AT4G10070	-	KH domain-containing protein	KH domain-containing protein	-	KH domain-containing protein; FUNCTIONS IN: RNA binding, nucleic acid binding; INVOLVED IN: biological_process unknown; LOCATED IN: cellular_component unknown; EXPRESSED IN: 23 plant structures; EXPRESSED DURING: 13 growth stages; CONTAINS InterPro DOMAIN/s: K Homology (InterPro:IPR004087), K Homology, type 1, subgroup (InterPro:IPR018111), K Homology, type 1 (InterPro:IPR004088); BEST Arabidopsi…	PF00013	PTHR10288,PTHR10288:SF145	KOG1676	-	K13210	GO:0003723
4	17446812	1.11e-08	Cu65	Potri.004G152400	17421330	17438179	-	3'	8633	4_17446812	7.95468	-	Potri.004G152400	PF00613,PF00454	PTHR10048,PTHR10048:SF15	-	2.7.1.67	K00888	GO:0016773,GO:0048015,GO:0046854	-	AT1G49340	ATPI4K ALPHA	Phosphatidylinositol 3- and 4-kinase family protein	Phosphatidylinositol 3- and 4-kinase family protein	Encodes a phosphatidylinositol 4-kinase that is expressed in inflorescences and shoots.	ATPI4K ALPHA; FUNCTIONS IN: 1-phosphatidylinositol 4-kinase activity, inositol or phosphatidylinositol kinase activity; INVOLVED IN: protein amino acid phosphorylation; LOCATED IN: plasma membrane; EXPRESSED IN: shoot, male gametophyte, flower, pollen tube; EXPRESSED DURING: L mature pollen stage, M germinated pollen stage; CONTAINS InterPro DOMAIN/s: Phosphoinositide 3-kinase, accessory (PIK) do…	PF00613,PF00454	PTHR10048,PTHR10048:SF15	-	2.7.1.67	K00888	GO:0016773,GO:0048015,GO:0046854
4	17446812	1.11e-08	Cu65	Potri.004G152500	17442848	17443057	-	3'	3755	4_17446812	7.95468	-	Potri.004G152500	-	PTHR34272	-	-	-	-	-	AT2G16190	-	-	-	-	BEST Arabidopsis thaliana protein match is: hydroxyproline-rich glycoprotein family protein (TAIR:AT1G49330.1); Has 77 Blast hits to 77 proteins in 25 species: Archae - 0; Bacteria - 0; Metazoa - 6; Fungi - 13; Plants - 56; Viruses - 0; Other Eukaryotes - 2 (source: NCBI BLink).	-	-	-	-	-	-
4	17446812	1.11e-08	Cu65	Potri.004G152600	17446134	17447150	-	in gene	0	4_17446812	7.95468	-	Potri.004G152600	-	PTHR34272	-	-	-	-	-	AT1G49330	-	hydroxyproline-rich glycoprotein family protein	hydroxyproline-rich glycoprotein family protein	-	hydroxyproline-rich glycoprotein family protein; BEST Arabidopsis thaliana protein match is: unknown protein (TAIR:AT2G16190.1); Has 882 Blast hits to 731 proteins in 140 species: Archae - 0; Bacteria - 49; Metazoa - 218; Fungi - 71; Plants - 381; Viruses - 66; Other Eukaryotes - 97 (source: NCBI BLink).	-	PTHR34272	-	-	-	-
4	17446812	1.11e-08	Cu65	Potri.004G152700	17450768	17452288	+	5'	3956	4_17446812	7.95468	-	Potri.004G152700	-	PTHR35989,PTHR35989:SF1	-	-	-	-	-	AT1G11760	MED32	-	-	-	MED32; Has 41 Blast hits to 40 proteins in 14 species: Archae - 0; Bacteria - 0; Metazoa - 0; Fungi - 0; Plants - 41; Viruses - 0; Other Eukaryotes - 0 (source: NCBI BLink).	-	PTHR35989,PTHR35989:SF1	-	-	-	-
19	13300131	1.12e-08	Al27	Potri.019G104200	13290082	13290543	-	3'	9588	19_13300131	7.95078	-	Potri.019G104200	PF13947	PTHR33491,PTHR33491:SF5	-	-	-	GO:0030247	-	AT1G16090	WAKL7	wall associated kinase-like 7	wall associated kinase-like 7	WAK-like kinase	wall associated kinase-like 7 (WAKL7); FUNCTIONS IN: protein serine/threonine kinase activity; LOCATED IN: endomembrane system, integral to membrane; EXPRESSED IN: 12 plant structures; EXPRESSED DURING: 7 growth stages; CONTAINS InterPro DOMAIN/s: Wall-associated kinase (InterPro:IPR013695); BEST Arabidopsis thaliana protein match is: Wall-associated kinase family protein (TAIR:AT1G79670.1); Has …	PF08488,PF13947	PTHR33491,PTHR33491:SF5	-	-	-	GO:0016021,GO:0004674,GO:0030247
19	13300131	1.12e-08	Al27	Potri.019G104300	13298178	13298384	+	3'	1747	19_13300131	7.95078	-	Potri.019G104300	-	PTHR33320,PTHR33320:SF2	-	-	-	-	-	AT1G52855	-	-	-	-	unknown protein; BEST Arabidopsis thaliana protein match is: unknown protein (TAIR:AT3G15534.1); Has 35333 Blast hits to 34131 proteins in 2444 species: Archae - 798; Bacteria - 22429; Metazoa - 974; Fungi - 991; Plants - 531; Viruses - 0; Other Eukaryotes - 9610 (source: NCBI BLink).	-	PTHR33320,PTHR33320:SF2	-	-	-	-
19	13300131	1.12e-08	Al27	Potri.019G104400	13302199	13305475	+	5'	2068	19_13300131	7.95078	-	Potri.019G104400	PF04410	PTHR31633	KOG2236	-	K14763	GO:0042254,GO:0001522	-	AT1G03530	ATNAF1	nuclear assembly factor 1	nuclear assembly factor 1	-	nuclear assembly factor 1 (NAF1); FUNCTIONS IN: snoRNA binding, pseudouridine synthase activity; INVOLVED IN: biological_process unknown; LOCATED IN: box H/ACA snoRNP complex; EXPRESSED IN: 23 plant structures; EXPRESSED DURING: 13 growth stages; CONTAINS InterPro DOMAIN/s: H/ACA ribonucleoprotein complex, subunit Gar1/Naf1 (InterPro:IPR007504); Has 55446 Blast hits to 31211 proteins in 1683 spec…	PF04410	PTHR31633	KOG2236	-	K14763	GO:0042254,GO:0001522
19	13300131	1.12e-08	Al27	Potri.019G104500	13306929	13311828	-	5'	6798	19_13300131	7.95078	-	Potri.019G104500	PF01342	PTHR34053,PTHR34053:SF1	-	-	-	GO:0003677	-	AT4G28190	ULT	Developmental regulator, ULTRAPETALA	Developmental regulator, ULTRAPETALA	Encodes a novel Cys-rich protein with a B-box like domain that acts as a negative regulator of meristem cell accumulation in inflorescence and floral meristems as loss-of-function ult1 mutations cause inflorescence meristem enlargement, the production of extra flowers and floral organs, and a decrease in floral meristem determinacy. Acts opposite to CLF which represses AG, but preventing depositi…	ULTRAPETALA1 (ULT1); FUNCTIONS IN: DNA binding; INVOLVED IN: regulation of floral meristem growth, meristem determinacy, regulation of inflorescence meristem growth, floral meristem determinacy; LOCATED IN: cytosol, nucleus; EXPRESSED IN: 29 plant structures; EXPRESSED DURING: 19 growth stages; CONTAINS InterPro DOMAIN/s: Developmental regulator, ULTRAPETALA (InterPro:IPR020533), SAND domain (Int…	PF01342	PTHR34053,PTHR34053:SF1	-	-	-	GO:0003677
4	17443992	1.13e-08	Cu65	Potri.004G152400	17421330	17438179	-	3'	5813	4_17443992	7.94692	-	Potri.004G152400	PF00613,PF00454	PTHR10048,PTHR10048:SF15	-	2.7.1.67	K00888	GO:0016773,GO:0048015,GO:0046854	-	AT1G49340	ATPI4K ALPHA	Phosphatidylinositol 3- and 4-kinase family protein	Phosphatidylinositol 3- and 4-kinase family protein	Encodes a phosphatidylinositol 4-kinase that is expressed in inflorescences and shoots.	ATPI4K ALPHA; FUNCTIONS IN: 1-phosphatidylinositol 4-kinase activity, inositol or phosphatidylinositol kinase activity; INVOLVED IN: protein amino acid phosphorylation; LOCATED IN: plasma membrane; EXPRESSED IN: shoot, male gametophyte, flower, pollen tube; EXPRESSED DURING: L mature pollen stage, M germinated pollen stage; CONTAINS InterPro DOMAIN/s: Phosphoinositide 3-kinase, accessory (PIK) do…	PF00613,PF00454	PTHR10048,PTHR10048:SF15	-	2.7.1.67	K00888	GO:0016773,GO:0048015,GO:0046854
4	17443992	1.13e-08	Cu65	Potri.004G152500	17442848	17443057	-	3'	935	4_17443992	7.94692	-	Potri.004G152500	-	PTHR34272	-	-	-	-	-	AT2G16190	-	-	-	-	BEST Arabidopsis thaliana protein match is: hydroxyproline-rich glycoprotein family protein (TAIR:AT1G49330.1); Has 77 Blast hits to 77 proteins in 25 species: Archae - 0; Bacteria - 0; Metazoa - 6; Fungi - 13; Plants - 56; Viruses - 0; Other Eukaryotes - 2 (source: NCBI BLink).	-	-	-	-	-	-
4	17443992	1.13e-08	Cu65	Potri.004G152600	17446134	17447150	-	5'	2142	4_17443992	7.94692	-	Potri.004G152600	-	PTHR34272	-	-	-	-	-	AT1G49330	-	hydroxyproline-rich glycoprotein family protein	hydroxyproline-rich glycoprotein family protein	-	hydroxyproline-rich glycoprotein family protein; BEST Arabidopsis thaliana protein match is: unknown protein (TAIR:AT2G16190.1); Has 882 Blast hits to 731 proteins in 140 species: Archae - 0; Bacteria - 49; Metazoa - 218; Fungi - 71; Plants - 381; Viruses - 66; Other Eukaryotes - 97 (source: NCBI BLink).	-	PTHR34272	-	-	-	-
4	17443992	1.13e-08	Cu65	Potri.004G152700	17450768	17452288	+	5'	6776	4_17443992	7.94692	-	Potri.004G152700	-	PTHR35989,PTHR35989:SF1	-	-	-	-	-	AT1G11760	MED32	-	-	-	MED32; Has 41 Blast hits to 40 proteins in 14 species: Archae - 0; Bacteria - 0; Metazoa - 0; Fungi - 0; Plants - 41; Viruses - 0; Other Eukaryotes - 0 (source: NCBI BLink).	-	PTHR35989,PTHR35989:SF1	-	-	-	-
17	2307727	1.19e-08	Na23	Potri.017G025000	2297910	2299534	+	3'	8193	17_2307727	7.92445	-	Potri.017G025000	PF03140	PTHR31170	-	-	-	-	-	AT2G28580	-	Plant protein of unknown function (DUF247)	Plant protein of unknown function (DUF247)	-	Plant protein of unknown function (DUF247); CONTAINS InterPro DOMAIN/s: Protein of unknown function DUF247, plant (InterPro:IPR004158); BEST Arabidopsis thaliana protein match is: Plant protein of unknown function (DUF247) (TAIR:AT2G44930.1); Has 1063 Blast hits to 972 proteins in 18 species: Archae - 0; Bacteria - 0; Metazoa - 0; Fungi - 0; Plants - 1063; Viruses - 0; Other Eukaryotes - 0 (sourc…	PF03140	PTHR31170	-	-	-	-
17	2307727	1.19e-08	Na23	Potri.017G025100	2309796	2311312	+	5'	2069	17_2307727	7.92445	-	Potri.017G025100	PF03140	PTHR31170	-	-	-	-	-	AT3G60470	-	Plant protein of unknown function (DUF247)	Plant protein of unknown function (DUF247)	-	Plant protein of unknown function (DUF247); CONTAINS InterPro DOMAIN/s: Protein of unknown function DUF247, plant (InterPro:IPR004158); BEST Arabidopsis thaliana protein match is: Plant protein of unknown function (DUF247) (TAIR:AT2G28580.1); Has 1401 Blast hits to 907 proteins in 17 species: Archae - 0; Bacteria - 0; Metazoa - 0; Fungi - 0; Plants - 1401; Viruses - 0; Other Eukaryotes - 0 (sourc…	PF03140	PTHR31170	-	-	-	-
11	1497821	1.19e-08	Al27	Potri.011G017500	1485885	1488663	-	3'	9158	11_1497821	7.92445	-
11	1497821	1.19e-08	Al27	Potri.011G017600	1488825	1490897	-	3'	6924	11_1497821	7.92445	-
11	1497821	1.19e-08	Al27	Potri.011G017700	1495586	1496413	-	3'	1408	11_1497821	7.92445	-	Potri.011G017700	PF04755	-	-	-	-	-	-	AT4G22240	-	Plastid-lipid associated protein PAP / fibrillin family protein	Plastid-lipid associated protein PAP / fibrillin family protein	-	Plastid-lipid associated protein PAP / fibrillin family protein; FUNCTIONS IN: structural molecule activity; INVOLVED IN: biological_process unknown; LOCATED IN: thylakoid, thylakoid lumen, chloroplast thylakoid membrane, chloroplast, plastoglobule; EXPRESSED IN: fruit, guard cell, leaf; EXPRESSED DURING: seedling growth; CONTAINS InterPro DOMAIN/s: Plastid lipid-associated protein/fibrillin (Int…	PF04755	PTHR31906,PTHR31906:SF5	-	-	-	-
11	1497821	1.19e-08	Al27	Potri.011G017800	1496879	1497623	-	3'	198	11_1497821	7.92445	-	Potri.011G017800	PF12796	PTHR24177,PTHR24177:SF19	-	-	-	-	-	AT4G14390	-	Ankyrin repeat family protein	Ankyrin repeat family protein	-	Ankyrin repeat family protein; FUNCTIONS IN: molecular_function unknown; INVOLVED IN: biological_process unknown; LOCATED IN: cellular_component unknown; EXPRESSED IN: 19 plant structures; EXPRESSED DURING: 8 growth stages; CONTAINS InterPro DOMAIN/s: Ankyrin repeat-containing domain (InterPro:IPR020683), Ankyrin repeat (InterPro:IPR002110); BEST Arabidopsis thaliana protein match is: ankyrin rep…	PF13962,PF12796	PTHR24177,PTHR24177:SF52	KOG0502,KOG4412	-	-	-
11	1497821	1.19e-08	Al27	Potri.011G017900	1498463	1498858	-	5'	642	11_1497821	7.92445	-	Potri.011G017900	-	-	-	-	-	-	-	-	-	-	-	-	-	-	-	-	-	-	-
6	1662405	1.19e-08	Na23	Potri.006G023500	1649436	1660125	-	3'	2280	6_1662405	7.92445	-	Potri.006G023500	PF14631	PTHR32086	-	-	K10891	GO:0006281	-	AT4G14970	-	-	-	-	unknown protein; FUNCTIONS IN: molecular_function unknown; INVOLVED IN: biological_process unknown; LOCATED IN: chloroplast; EXPRESSED IN: 14 plant structures; EXPRESSED DURING: 6 growth stages; Has 257 Blast hits to 164 proteins in 70 species: Archae - 0; Bacteria - 4; Metazoa - 189; Fungi - 0; Plants - 38; Viruses - 0; Other Eukaryotes - 26 (source: NCBI BLink).	PF14631	PTHR32086	-	-	K10891	GO:0006281
6	1662405	1.19e-08	Na23	Potri.006G023600	1666183	1668012	+	5'	3778	6_1662405	7.92445	-	Potri.006G023600	PF00201	PTHR11926,PTHR11926:SF235	KOG1192	2.4.1.324	-	GO:0016758,GO:0008152	-	AT1G22360	AtUGT85A2	UDP-glucosyl transferase 85A2	UDP-glucosyl transferase 85A2	-	UDP-glucosyl transferase 85A2 (UGT85A2); FUNCTIONS IN: UDP-glycosyltransferase activity, transferase activity, transferring glycosyl groups, glucuronosyltransferase activity; INVOLVED IN: metabolic process; LOCATED IN: cellular_component unknown; EXPRESSED IN: 21 plant structures; EXPRESSED DURING: 11 growth stages; CONTAINS InterPro DOMAIN/s: UDP-glucuronosyl/UDP-glucosyltransferase (InterPro:IP…	PF00201	PTHR11926,PTHR11926:SF233	KOG1192	2.4.1.203	-	GO:0016758,GO:0008152
11	15108560	1.23e-08	Cu65	Potri.011G125800	15092409	15103262	+	3'	5298	11_15108560	7.91009	-	Potri.011G125800	PF02148,PF00627,PF00443	PTHR24006,PTHR24006:SF449	-	3.4.19.12	K11836	GO:0008270,GO:0036459,GO:0016579	-	AT3G20630	ATUBP14	ubiquitin-specific protease 14	ubiquitin-specific protease 14	Encodes a ubiquitin-specific protease. Identical to TTN6. Loss of function mutations are embryo lethals, having development arrested at the preglobular/globular stage. Also involved in root responses to phosphate deficiency.	ubiquitin-specific protease 14 (UBP14); CONTAINS InterPro DOMAIN/s: Zinc finger, UBP-type (InterPro:IPR001607), Ubiquitin-associated/translation elongation factor EF1B, N-terminal, eukaryote (InterPro:IPR015940), Ubiquitin-associated/translation elongation factor EF1B, N-terminal (InterPro:IPR000449), Peptidase C19, ubiquitin carboxyl-terminal hydrolase 2, conserved site (InterPro:IPR018200), Pep…	PF13423,PF02148,PF00627	PTHR24006,PTHR24006:SF22	-	3.4.19.12	K11836	GO:0008270
11	15108560	1.23e-08	Cu65	Potri.011G125900	15108801	15110515	-	5'	241	11_15108560	7.91009	-	Potri.011G125900	PF00249	PTHR10641,PTHR10641:SF586	KOG0048	-	K09422	-	MYB	AT4G21440	ATM4	MYB-like 102	MYB-like 102	Encodes a MYB transcription factor involved in wounding and osmotic stress response. Member of the R2R3 factor gene family.	MYB-like 102 (MYB102); CONTAINS InterPro DOMAIN/s: SANT, DNA-binding (InterPro:IPR001005), Homeodomain-like (InterPro:IPR009057), Myb, DNA-binding (InterPro:IPR014778), HTH transcriptional regulator, Myb-type, DNA-binding (InterPro:IPR017930), Homeodomain-related (InterPro:IPR012287), Myb transcription factor (InterPro:IPR015495); BEST Arabidopsis thaliana protein match is: myb domain protein 74 …	PF00249	PTHR10641,PTHR10641:SF606	KOG0048	-	K09422	-
3	16745008	1.29e-08	Cu65	Potri.003G154000	16736095	16736826	+	3'	8182	3_16745008	7.88941	-	Potri.003G154000	-	-	-	-	-	-	-	-	-	-	-	-	-	-	-	-	-	-	-
3	16745008	1.29e-08	Cu65	Potri.003G154100	16737920	16744954	+	3'	54	3_16745008	7.88941	-	Potri.003G154100	-	-	-	-	-	-	-	-	-	-	-	-	-	-	-	-	-	-	-
3	16745008	1.29e-08	Cu65	Potri.003G154200	16746509	16747332	-	5'	1501	3_16745008	7.88941	-	Potri.003G154200	-	-	-	-	-	-	-	-	-	-	-	-	-	-	-	-	-	-	-
3	16745008	1.29e-08	Cu65	Potri.003G154300	16746509	16753982	+	5'	1501	3_16745008	7.88941	-
1	47393084	1.31e-08	Na23	Potri.001G442600	47380475	47384472	+	3'	8612	1_47393084	7.88273	-	Potri.001G442600	-	PTHR31096,PTHR31096:SF23	-	2.7.7.59	-	-	-	AT2G36840	-	ACT-like superfamily protein	ACT-like superfamily protein	Encodes a ACT domain-containing protein. The ACT domain, named after bacterial aspartate kinase, chorismate mutase and TyrA (prephenate dehydrogenase), is a regulatory domain that serves as an amino acid-binding site in feedback-regulated amino acid metabolic enzymes.	ACT-like superfamily protein; FUNCTIONS IN: amino acid binding; INVOLVED IN: metabolic process; LOCATED IN: cellular_component unknown; EXPRESSED IN: 20 plant structures; EXPRESSED DURING: 12 growth stages; CONTAINS InterPro DOMAIN/s: Amino acid-binding ACT (InterPro:IPR002912); BEST Arabidopsis thaliana protein match is: ACT domain-containing protein (TAIR:AT2G39570.1); Has 798 Blast hits to 670…	PF01842	PTHR31096,PTHR31096:SF23	-	2.7.7.59	-	GO:0016597,GO:0008152
1	47393084	1.31e-08	Na23	Potri.001G442700	47398825	47400525	+	5'	5741	1_47393084	7.88273	-	Potri.001G442700	PF01055	PTHR22762,PTHR22762:SF82	-	3.2.1.20	-	GO:0005975,GO:0004553	-	AT5G11720	-	Glycosyl hydrolases family 31 protein	Glycosyl hydrolases family 31 protein	-	Glycosyl hydrolases family 31 protein; FUNCTIONS IN: hydrolase activity, hydrolyzing O-glycosyl compounds; INVOLVED IN: carbohydrate metabolic process; LOCATED IN: apoplast, vacuole, plant-type cell wall; EXPRESSED IN: 23 plant structures; EXPRESSED DURING: 13 growth stages; CONTAINS InterPro DOMAIN/s: Glycoside hydrolase, family 31 (InterPro:IPR000322), Glycoside hydrolase, catalytic core (Inter…	PF13802,PF16863,PF01055	PTHR22762,PTHR22762:SF82	-	3.2.1.20	K01187	GO:0005975,GO:0004553
1	47393084	1.31e-08	Na23	Potri.001G442800	47402305	47406214	+	5'	9221	1_47393084	7.88273	-	Potri.001G442800	PF13802,PF16863,PF01055	PTHR22762,PTHR22762:SF82	-	3.2.1.20	K01187	GO:0005975,GO:0004553	-	AT5G11720	-	Glycosyl hydrolases family 31 protein	Glycosyl hydrolases family 31 protein	-	Glycosyl hydrolases family 31 protein; FUNCTIONS IN: hydrolase activity, hydrolyzing O-glycosyl compounds; INVOLVED IN: carbohydrate metabolic process; LOCATED IN: apoplast, vacuole, plant-type cell wall; EXPRESSED IN: 23 plant structures; EXPRESSED DURING: 13 growth stages; CONTAINS InterPro DOMAIN/s: Glycoside hydrolase, family 31 (InterPro:IPR000322), Glycoside hydrolase, catalytic core (Inter…	PF13802,PF16863,PF01055	PTHR22762,PTHR22762:SF82	-	3.2.1.20	K01187	GO:0005975,GO:0004553
6	10786995	1.36e-08	Al27	Potri.006G131500	10779854	10781784	+	3'	5211	6_10786995	7.86646	-	Potri.006G131500	PF00164	PTHR11652,PTHR11652:SF16	KOG1749	-	K02973	GO:0006412,GO:0005840,GO:0005622,GO:0003735	-	AT5G02960	-	Ribosomal protein S12/S23 family protein	Ribosomal protein S12/S23 family protein	-	Ribosomal protein S12/S23 family protein; FUNCTIONS IN: structural constituent of ribosome; INVOLVED IN: translation; LOCATED IN: cytosolic small ribosomal subunit, cytosolic ribosome, ribosome; EXPRESSED IN: guard cell, leaf; CONTAINS InterPro DOMAIN/s: Ribosomal protein S23, eukaryotic/archaeal (InterPro:IPR005680), Ribosomal protein S12/S23 (InterPro:IPR006032), Nucleic acid-binding, OB-fold-l…	PF00164	PTHR11652,PTHR11652:SF16	KOG1749	-	K02973	GO:0006412,GO:0005840,GO:0005622,GO:0003735
6	10786995	1.36e-08	Al27	Potri.006G131600	10789470	10791251	-	5'	2475	6_10786995	7.86646	-	Potri.006G131600	-	-	-	-	-	-	-	-	-	-	-	-	-	-	-	-	-	-	-
6	10786995	1.36e-08	Al27	Potri.006G131700	10791403	10796351	-	5'	4408	6_10786995	7.86646	-	Potri.006G131700	-	PTHR33737,PTHR33737:SF2	-	-	-	-	-	AT3G53320	-	-	-	-	unknown protein; BEST Arabidopsis thaliana protein match is: unknown protein (TAIR:AT2G37070.1); Has 11044 Blast hits to 5993 proteins in 551 species: Archae - 8; Bacteria - 1486; Metazoa - 4078; Fungi - 1814; Plants - 348; Viruses - 112; Other Eukaryotes - 3198 (source: NCBI BLink).	-	PTHR33737	-	-	-	-
10	2334555	1.39e-08	Na23	Potri.010G017600	2329959	2333689	+	3'	866	10_2334555	7.85699	-	Potri.010G017600	PF11883,PF08276,PF00954,PF01453,PF00069	PTHR27002,PTHR27002:SF97	KOG1187	2.7.11.1	-	GO:0004674,GO:0048544,GO:0006468,GO:0005524,GO:0004672	-	AT4G21380	ARK3	receptor kinase 3	receptor kinase 3	encodes a putative receptor-like serine/threonine protein kinases that is similar to Brassica self-incompatibility (S) locus. Expressed in root. Shoot expression limited to limited to the root-hypocotyl transition zone and at the base of lateral roots as well as in axillary buds, and pedicels.	receptor kinase 3 (RK3); FUNCTIONS IN: transmembrane receptor protein serine/threonine kinase activity, kinase activity; INVOLVED IN: protein amino acid phosphorylation, recognition of pollen; LOCATED IN: plasma membrane, vacuole; EXPRESSED IN: 15 plant structures; EXPRESSED DURING: 12 growth stages; CONTAINS InterPro DOMAIN/s: Curculin-like (mannose-binding) lectin (InterPro:IPR001480), Protein …	PF12398,PF08276,PF11883,PF01453,PF00954,PF07714	PTHR27002,PTHR27002:SF93	KOG1187	2.7.11.1	-	GO:0004674,GO:0048544,GO:0006468,GO:0004672
10	2334555	1.39e-08	Na23	Potri.010G017700	2335890	2337114	+	5'	1335	10_2334555	7.85699	-	Potri.010G017700	PF12776	PTHR31704,PTHR31704:SF9	-	-	-	-	-	AT5G05800	-	-	-	-	unknown protein; BEST Arabidopsis thaliana protein match is: unknown protein (TAIR:AT3G11290.1); Has 1807 Blast hits to 1807 proteins in 277 species: Archae - 0; Bacteria - 0; Metazoa - 736; Fungi - 347; Plants - 385; Viruses - 0; Other Eukaryotes - 339 (source: NCBI BLink).	PF12776	PTHR31704,PTHR31704:SF6	-	-	-	-
10	2334555	1.39e-08	Na23	Potri.010G017800	2343039	2344579	+	5'	8484	10_2334555	7.85699	-	Potri.010G017800	PF08276,PF00954,PF01453	PTHR27002,PTHR27002:SF97	-	2.7.11.1	-	GO:0048544	-	AT4G27290	-	S-locus lectin protein kinase family protein	S-locus lectin protein kinase family protein	-	S-locus lectin protein kinase family protein; FUNCTIONS IN: sugar binding, protein serine/threonine kinase activity, protein kinase activity, ATP binding; INVOLVED IN: protein amino acid phosphorylation, recognition of pollen; LOCATED IN: endomembrane system; CONTAINS InterPro DOMAIN/s: Curculin-like (mannose-binding) lectin (InterPro:IPR001480), Apple-like (InterPro:IPR003609), PAN-2 domain (Int…	PF08276,PF01453,PF00954,PF07714	PTHR27002,PTHR27002:SF30	KOG1187	2.7.11.1	-	GO:0048544,GO:0006468,GO:0004672
150	59327	1.43e-08	Al27	Potri.T103600	53115	54877	+	3'	4450	150_59327	7.84466	-	Potri.T103600	PF00909	PTHR11730,PTHR11730:SF47	KOG0682	-	K03320	GO:0016020,GO:0015696,GO:0008519,GO:0072488	-	AT2G38290	AMT2	ammonium transporter 2	ammonium transporter 2	encodes a high-affinity ammonium transporter, which is expressed in shoot and root. Expression in root and shoot is under nitrogen and carbon dioxide regulation, respectively.	ammonium transporter 2 (AMT2); FUNCTIONS IN: ammonium transmembrane transporter activity, high affinity secondary active ammonium transmembrane transporter activity; INVOLVED IN: ammonium transport, response to nematode, cellular response to nitrogen starvation; LOCATED IN: plasma membrane; EXPRESSED IN: 24 plant structures; EXPRESSED DURING: 13 growth stages; CONTAINS InterPro DOMAIN/s: Ammonium…	PF00909	PTHR11730,PTHR11730:SF38	KOG0682	-	K03320	GO:0016020,GO:0015696,GO:0008519,GO:0072488
150	59327	1.43e-08	Al27	Potri.T103700	55518	59645	+	in gene	0	150_59327	7.84466	-	Potri.T103700	-	PTHR34574,PTHR34574:SF1	-	-	-	-	-	AT5G28830	-	calcium-binding EF hand family protein	calcium-binding EF hand family protein	-	calcium-binding EF hand family protein; FUNCTIONS IN: calcium ion binding; INVOLVED IN: biological_process unknown; LOCATED IN: cellular_component unknown; CONTAINS InterPro DOMAIN/s: Calcium-binding EF-hand (InterPro:IPR002048); BEST Arabidopsis thaliana protein match is: Calcium-binding EF-hand family protein (TAIR:AT4G38810.2); Has 259 Blast hits to 210 proteins in 27 species: Archae - 0; Bact…	-	PTHR34574,PTHR34574:SF1	-	-	-	-
150	59327	1.43e-08	Al27	Potri.T103800	60014	60710	+	5'	687	150_59327	7.84466	-	Potri.T103800	-	-	-	-	-	-	-	-	-	-	-	-	-	-	-	-	-	-	-
150	59327	1.43e-08	Al27	Potri.T103900	63629	66859	-	5'	4302	150_59327	7.84466	-	Potri.T103900	PF16363	PTHR10366,PTHR10366:SF327	KOG1429	5.1.3.18	K10046	-	-	AT5G28840	GME	GDP-D-mannose 3',5'-epimerase	GDP-D-mannose 3',5'-epimerase	Encodes a protein with GDP-D-mannose 3',5'-epimerase activity. The enzyme is involved in ascorbate biosynthesis. It catalyzes the conversion of GDP-D-mannose to GDP-L-galactose.	GDP-D-mannose 3',5'-epimerase (GME); FUNCTIONS IN: NAD or NADH binding, GDP-mannose 3,5-epimerase activity, catalytic activity; INVOLVED IN: L-ascorbic acid biosynthetic process, nucleotide-sugar metabolic process; LOCATED IN: cellular_component unknown; EXPRESSED IN: 25 plant structures; EXPRESSED DURING: 17 growth stages; CONTAINS InterPro DOMAIN/s: NAD-dependent epimerase/dehydratase (InterPro…	PF16363	PTHR10366,PTHR10366:SF327	-	5.1.3.18	K10046	-
19	14075163	1.48e-08	Al27	Potri.019G111600	14066624	14071654	+	3'	3509	19_14075163	7.82974	-	Potri.019G111600	PF07223	PTHR31805,PTHR31805:SF3	-	-	-	-	-	AT4G28300	-	Protein of unknown function (DUF1421)	Protein of unknown function (DUF1421)	Encodes a protein with 13.6% proline amino acids that is predicted to localize to the cell wall.	Protein of unknown function (DUF1421); CONTAINS InterPro DOMAIN/s: Protein of unknown function DUF1421 (InterPro:IPR010820); BEST Arabidopsis thaliana protein match is: Protein of unknown function (DUF1421) (TAIR:AT5G14540.1); Has 69579 Blast hits to 42038 proteins in 1735 species: Archae - 58; Bacteria - 7637; Metazoa - 28439; Fungi - 15188; Plants - 8838; Viruses - 1343; Other Eukaryotes - 8076…	PF07223	PTHR31805,PTHR31805:SF3	-	-	-	-
19	14075163	1.48e-08	Al27	Potri.019G111700	14080094	14084077	+	5'	4931	19_14075163	7.82974	-	Potri.019G111700	PF12906,PF12428	PTHR23012,PTHR23012:SF94	-	6.3.2.19	-	GO:0008270	-	AT2G02960	-	RING/FYVE/PHD zinc finger superfamily protein	RING/FYVE/PHD zinc finger superfamily protein	-	RING/FYVE/PHD zinc finger superfamily protein; FUNCTIONS IN: zinc ion binding; EXPRESSED IN: 24 plant structures; EXPRESSED DURING: 15 growth stages; CONTAINS InterPro DOMAIN/s: Protein of unknown function DUF3675 (InterPro:IPR022143), Zinc finger, C3HC4 RING-type (InterPro:IPR018957), Zinc finger, RING-CH-type (InterPro:IPR011016); BEST Arabidopsis thaliana protein match is: RING/FYVE/PHD zinc f…	PF12906,PF12428	PTHR23012,PTHR23012:SF91	KOG1609	6.3.2.19	-	GO:0008270
8	8561854	1.51e-08	Cu65	Potri.008G130200	8539584	8554404	+	3'	7450	8_8561854	7.82102	-	Potri.008G130200	PF00485	PTHR10285,PTHR10285:SF53	KOG4203	2.7.1.48	-	GO:0016301,GO:0008152,GO:0005524	-	AT2G01460	-	P-loop containing nucleoside triphosphate hydrolases superfamily protein	P-loop containing nucleoside triphosphate hydrolases superfamily protein	-	P-loop containing nucleoside triphosphate hydrolases superfamily protein; FUNCTIONS IN: nucleoside-triphosphatase activity, kinase activity, nucleotide binding, phosphotransferase activity, alcohol group as acceptor, ATP binding; INVOLVED IN: biosynthetic process, metabolic process; LOCATED IN: cellular_component unknown; EXPRESSED IN: 6 plant structures; EXPRESSED DURING: 4 anthesis; CONTAINS In…	PF00485	PTHR10285,PTHR10285:SF53	KOG4203	2.7.1.48	-	GO:0016301,GO:0008152,GO:0005524
8	8561854	1.51e-08	Cu65	Potri.008G130300	8555801	8561469	-	3'	385	8_8561854	7.82102	-	Potri.008G130300	-	PTHR23284	KOG0771	-	K14003	-	-	AT2G01470	ATSEC12	SEC12P-like 2 protein	SEC12P-like 2 protein	Sec12p-like protein (GTP exchange protein) that functionally complements yeast sec12 null mutant. Protein is localized to the ER.	SEC12P-like 2 protein (STL2P); FUNCTIONS IN: nucleotide binding; INVOLVED IN: ER to Golgi vesicle-mediated transport; LOCATED IN: integral to endoplasmic reticulum membrane, endoplasmic reticulum, plasma membrane, membrane; EXPRESSED IN: 25 plant structures; EXPRESSED DURING: 13 growth stages; CONTAINS InterPro DOMAIN/s: WD40 repeat-like-containing domain (InterPro:IPR011046), WD40-repeat-contain…	-	PTHR23284	KOG0771	-	K14003	-
8	8561854	1.51e-08	Cu65	Potri.008G130400	8563566	8569270	-	5'	1712	8_8561854	7.82102	-	Potri.008G130400	PF01740,PF00916	PTHR11814,PTHR11814:SF93	-	-	K17471	GO:0016021,GO:0015116,GO:0008272,GO:0055085,GO:0016020,GO:0008271	-	AT1G23090	AST91	sulfate transporter 91	sulfate transporter 91	Encodes AST91 mRNA for sulfate transporter.	sulfate transporter 91 (AST91); FUNCTIONS IN: sulfate transmembrane transporter activity; INVOLVED IN: sulfate transport, transport, transmembrane transport; LOCATED IN: integral to membrane, membrane; EXPRESSED IN: 22 plant structures; EXPRESSED DURING: 13 growth stages; CONTAINS InterPro DOMAIN/s: Sulphate transporter (InterPro:IPR011547), Sulphate transporter/antisigma-factor antagonist STAS (…	PF01740,PF00916	PTHR11814,PTHR11814:SF93	-	-	K17471	GO:0016021,GO:0015116,GO:0008272,GO:0055085,GO:0016020,GO:0008271
10	18006733	1.53e-08	Al27	Potri.010G182200	18003504	18004587	+	3'	2146	10_18006733	7.81531	-	Potri.010G182200	PF07107	PTHR33703	-	-	-	-	-	AT3G10985	ATWI-12	senescence associated gene 20	senescence associated gene 20	A senescence-associated gene whose expression is induced in response to treatment with Nep1, a fungal protein that causes necrosis.	senescence associated gene 20 (SAG20); CONTAINS InterPro DOMAIN/s: Wound-induced protein, Wun1, subgroup (InterPro:IPR016533), Wound-induced protein, Wun1 (InterPro:IPR009798); BEST Arabidopsis thaliana protein match is: Nuclear transport factor 2 (NTF2) family protein (TAIR:AT5G01740.1); Has 35333 Blast hits to 34131 proteins in 2444 species: Archae - 798; Bacteria - 22429; Metazoa - 974; Fungi …	PF07107	PTHR33703	-	-	-	-
10	18006733	1.53e-08	Al27	Potri.010G182300	18010787	18011752	-	5'	4054	10_18006733	7.81531	-	Potri.010G182300	PF04525	PTHR31087,PTHR31087:SF17	-	-	-	-	-	AT3G56180	-	Protein of unknown function (DUF567)	Protein of unknown function (DUF567)	-	Protein of unknown function (DUF567); CONTAINS InterPro DOMAIN/s: Protein of unknown function DUF567 (InterPro:IPR007612); BEST Arabidopsis thaliana protein match is: Protein of unknown function (DUF567) (TAIR:AT3G10986.1); Has 252 Blast hits to 250 proteins in 15 species: Archae - 0; Bacteria - 0; Metazoa - 0; Fungi - 2; Plants - 250; Viruses - 0; Other Eukaryotes - 0 (source: NCBI BLink).	PF04525	PTHR31087,PTHR31087:SF17	-	-	-	-
10	18006733	1.53e-08	Al27	Potri.010G182400	18012903	18018805	+	5'	6170	10_18006733	7.81531	-	Potri.010G182400	PF08238	PTHR36792,PTHR36792:SF2	-	-	-	-	-	AT2G38450	-	-	-	-	CONTAINS InterPro DOMAIN/s: Sel1-like (InterPro:IPR006597); BEST Arabidopsis thaliana protein match is: unknown protein (TAIR:AT5G05360.1); Has 88 Blast hits to 88 proteins in 25 species: Archae - 0; Bacteria - 16; Metazoa - 0; Fungi - 0; Plants - 70; Viruses - 0; Other Eukaryotes - 2 (source: NCBI BLink).	PF08238	-	-	-	-	-
17	2312875	1.58e-08	Na23	Potri.017G025100	2309796	2311312	+	3'	1563	17_2312875	7.80134	-	Potri.017G025100	PF03140	PTHR31170	-	-	-	-	-	AT3G60470	-	Plant protein of unknown function (DUF247)	Plant protein of unknown function (DUF247)	-	Plant protein of unknown function (DUF247); CONTAINS InterPro DOMAIN/s: Protein of unknown function DUF247, plant (InterPro:IPR004158); BEST Arabidopsis thaliana protein match is: Plant protein of unknown function (DUF247) (TAIR:AT2G28580.1); Has 1401 Blast hits to 907 proteins in 17 species: Archae - 0; Bacteria - 0; Metazoa - 0; Fungi - 0; Plants - 1401; Viruses - 0; Other Eukaryotes - 0 (sourc…	PF03140	PTHR31170	-	-	-	-
4	6431838	1.64e-08	Cu65	Potri.004G077600	6424762	6430052	-	3'	1786	4_6431838	7.78516	-	Potri.004G077600	PF13245,PF13087	PTHR10887,PTHR10887:SF372	KOG1801	-	K10706	-	-	AT1G65810	-	P-loop containing nucleoside triphosphate hydrolases superfamily protein	P-loop containing nucleoside triphosphate hydrolases superfamily protein	-	P-loop containing nucleoside triphosphate hydrolases superfamily protein; BEST Arabidopsis thaliana protein match is: P-loop containing nucleoside triphosphate hydrolases superfamily protein (TAIR:AT1G65780.1); Has 6257 Blast hits to 5371 proteins in 1056 species: Archae - 197; Bacteria - 1787; Metazoa - 1336; Fungi - 1200; Plants - 672; Viruses - 106; Other Eukaryotes - 959 (source: NCBI BLink).	PF13086,PF13087	PTHR10887,PTHR10887:SF358	-	-	K10706	-
4	6431838	1.64e-08	Cu65	Potri.004G077700	6430705	6436169	-	in gene	0	4_6431838	7.78516	-	Potri.004G077700	PF13086,PF13087	PTHR10887,PTHR10887:SF358	-	-	K10706	-	-	AT1G65780	-	P-loop containing nucleoside triphosphate hydrolases superfamily protein	P-loop containing nucleoside triphosphate hydrolases superfamily protein	-	P-loop containing nucleoside triphosphate hydrolases superfamily protein; BEST Arabidopsis thaliana protein match is: P-loop containing nucleoside triphosphate hydrolases superfamily protein (TAIR:AT1G65810.1); Has 5699 Blast hits to 4991 proteins in 919 species: Archae - 198; Bacteria - 1488; Metazoa - 1292; Fungi - 1154; Plants - 656; Viruses - 49; Other Eukaryotes - 862 (source: NCBI BLink).	PF13086,PF13087	PTHR10887,PTHR10887:SF358	-	-	K10706	-
4	6431838	1.64e-08	Cu65	Potri.004G077800	6436979	6444394	-	5'	5141	4_6431838	7.78516	-	Potri.004G077800	PF13086,PF13087	PTHR10887,PTHR10887:SF358	KOG1801	-	K10706	-	-	AT1G65810	-	P-loop containing nucleoside triphosphate hydrolases superfamily protein	P-loop containing nucleoside triphosphate hydrolases superfamily protein	-	P-loop containing nucleoside triphosphate hydrolases superfamily protein; BEST Arabidopsis thaliana protein match is: P-loop containing nucleoside triphosphate hydrolases superfamily protein (TAIR:AT1G65780.1); Has 6257 Blast hits to 5371 proteins in 1056 species: Archae - 197; Bacteria - 1787; Metazoa - 1336; Fungi - 1200; Plants - 672; Viruses - 106; Other Eukaryotes - 959 (source: NCBI BLink).	PF13086,PF13087	PTHR10887,PTHR10887:SF358	-	-	K10706	-
4	6431845	1.64e-08	Cu65	Potri.004G077600	6424762	6430052	-	3'	1793	4_6431845	7.78516	-	Potri.004G077600	PF13245,PF13087	PTHR10887,PTHR10887:SF372	KOG1801	-	K10706	-	-	AT1G65810	-	P-loop containing nucleoside triphosphate hydrolases superfamily protein	P-loop containing nucleoside triphosphate hydrolases superfamily protein	-	P-loop containing nucleoside triphosphate hydrolases superfamily protein; BEST Arabidopsis thaliana protein match is: P-loop containing nucleoside triphosphate hydrolases superfamily protein (TAIR:AT1G65780.1); Has 6257 Blast hits to 5371 proteins in 1056 species: Archae - 197; Bacteria - 1787; Metazoa - 1336; Fungi - 1200; Plants - 672; Viruses - 106; Other Eukaryotes - 959 (source: NCBI BLink).	PF13086,PF13087	PTHR10887,PTHR10887:SF358	-	-	K10706	-
4	6431845	1.64e-08	Cu65	Potri.004G077700	6430705	6436169	-	in gene	0	4_6431845	7.78516	-	Potri.004G077700	PF13086,PF13087	PTHR10887,PTHR10887:SF358	-	-	K10706	-	-	AT1G65780	-	P-loop containing nucleoside triphosphate hydrolases superfamily protein	P-loop containing nucleoside triphosphate hydrolases superfamily protein	-	P-loop containing nucleoside triphosphate hydrolases superfamily protein; BEST Arabidopsis thaliana protein match is: P-loop containing nucleoside triphosphate hydrolases superfamily protein (TAIR:AT1G65810.1); Has 5699 Blast hits to 4991 proteins in 919 species: Archae - 198; Bacteria - 1488; Metazoa - 1292; Fungi - 1154; Plants - 656; Viruses - 49; Other Eukaryotes - 862 (source: NCBI BLink).	PF13086,PF13087	PTHR10887,PTHR10887:SF358	-	-	K10706	-
4	6431845	1.64e-08	Cu65	Potri.004G077800	6436979	6444394	-	5'	5134	4_6431845	7.78516	-	Potri.004G077800	PF13086,PF13087	PTHR10887,PTHR10887:SF358	KOG1801	-	K10706	-	-	AT1G65810	-	P-loop containing nucleoside triphosphate hydrolases superfamily protein	P-loop containing nucleoside triphosphate hydrolases superfamily protein	-	P-loop containing nucleoside triphosphate hydrolases superfamily protein; BEST Arabidopsis thaliana protein match is: P-loop containing nucleoside triphosphate hydrolases superfamily protein (TAIR:AT1G65780.1); Has 6257 Blast hits to 5371 proteins in 1056 species: Archae - 197; Bacteria - 1787; Metazoa - 1336; Fungi - 1200; Plants - 672; Viruses - 106; Other Eukaryotes - 959 (source: NCBI BLink).	PF13086,PF13087	PTHR10887,PTHR10887:SF358	-	-	K10706	-
1	23615079	1.74e-08	Mo98	Potri.001G225500	23603335	23605465	+	3'	9614	1_23615079	7.75945	-	Potri.001G225500	PF06110	PTHR12452	KOG3425	-	-	-	-	AT5G42850	-	Thioredoxin superfamily protein	Thioredoxin superfamily protein	-	Thioredoxin superfamily protein; CONTAINS InterPro DOMAIN/s: Thioredoxin fold (InterPro:IPR012335), Thioredoxin-like fold (InterPro:IPR012336), Protein of unknown function DUF953, thioredoxin-like (InterPro:IPR010357); Has 35333 Blast hits to 34131 proteins in 2444 species: Archae - 798; Bacteria - 22429; Metazoa - 974; Fungi - 991; Plants - 531; Viruses - 0; Other Eukaryotes - 9610 (source: NCBI…	PF06110	PTHR12452	KOG3425	-	-	-
1	23615079	1.74e-08	Mo98	Potri.001G225600	23606136	23612495	-	3'	2584	1_23615079	7.75945	-	Potri.001G225600	PF04824,PF04825	PTHR12585,PTHR12585:SF36	KOG1213	-	K06670	GO:0000228,GO:0005515	-	AT3G59550	ATRAD21.2	Rad21/Rec8-like family protein	Rad21/Rec8-like family protein	Encodes an alpha-kleisin protein that is localized primarily in the nucleolus and is essential for megagametogenesis and plays an important role in pollen development. alpha-kleisins are core components of meiotic and mitotic cohesin complexes.	SYN3; FUNCTIONS IN: molecular_function unknown; INVOLVED IN: mitosis, megagametogenesis, pollen development; LOCATED IN: nucleolus, nucleus, nuclear cohesin complex; EXPRESSED IN: 24 plant structures; EXPRESSED DURING: 14 growth stages; CONTAINS InterPro DOMAIN/s: Rad21/Rec8 like protein, C-terminal (InterPro:IPR006909), Rad21/Rec8 like protein, N-terminal (InterPro:IPR006910); BEST Arabidopsis t…	PF04824,PF04825	PTHR12585,PTHR12585:SF36	KOG1213	-	K06670	GO:0000228,GO:0005515
1	23615079	1.74e-08	Mo98	Potri.001G225700	23616826	23618418	-	5'	1747	1_23615079	7.75945	-	Potri.001G225700	PF06026	PTHR11934,PTHR11934:SF7	KOG3075	5.3.1.6	K01807	GO:0009052,GO:0004751	-	AT2G01290	RPI2	ribose-5-phosphate isomerase 2	ribose-5-phosphate isomerase 2	Cytosolic ribose-5-phosphate isomerase. Knockout mutation causes chloroplast dysfunction, late flowering and premature cell death.	ribose-5-phosphate isomerase 2 (RPI2); CONTAINS InterPro DOMAIN/s: Ribose-5-phosphate isomerase, type A, subgroup (InterPro:IPR020672), Ribose 5-phosphate isomerase, type A (InterPro:IPR004788); BEST Arabidopsis thaliana protein match is: Ribose 5-phosphate isomerase, type A protein (TAIR:AT1G71100.1); Has 5035 Blast hits to 5035 proteins in 1937 species: Archae - 235; Bacteria - 3542; Metazoa - …	PF06026	PTHR11934,PTHR11934:SF7	KOG3075	5.3.1.6	K01807	GO:0009052,GO:0004751
4	3493919	1.76e-08	Al27	Potri.004G045900	3481937	3486400	-	3'	7519	4_3493919	7.75449	-	Potri.004G045900	-	-	-	-	-	-	-	-	-	-	-	-	-	-	-	-	-	-	-
4	3493919	1.76e-08	Al27	Potri.004G046000	3488779	3489845	+	3'	4074	4_3493919	7.75449	-	Potri.004G046000	-	PTHR23241,PTHR23241:SF65	-	-	-	-	-	AT4G21020	-	Late embryogenesis abundant protein (LEA) family protein	Late embryogenesis abundant protein (LEA) family protein	-	Late embryogenesis abundant protein (LEA) family protein; BEST Arabidopsis thaliana protein match is: Late embryogenesis abundant protein (LEA) family protein (TAIR:AT5G44310.2); Has 25029 Blast hits to 12516 proteins in 1815 species: Archae - 109; Bacteria - 7990; Metazoa - 4935; Fungi - 1662; Plants - 2602; Viruses - 153; Other Eukaryotes - 7578 (source: NCBI BLink).	-	PTHR23241,PTHR23241:SF65	KOG4744	-	-	-
4	3493919	1.76e-08	Al27	Potri.004G046100	3494264	3496215	+	5'	345	4_3493919	7.75449	-	Potri.004G046100	PF02701	PTHR31992,PTHR31992:SF8	-	-	-	GO:0006355,GO:0003677	Dof	AT5G60850	OBP4	OBF binding protein 4	OBF binding protein 4	Encodes a zinc finger protein.	OBF binding protein 4 (OBP4); CONTAINS InterPro DOMAIN/s: Zinc finger, Dof-type (InterPro:IPR003851); BEST Arabidopsis thaliana protein match is: DOF zinc finger protein 1 (TAIR:AT1G51700.1); Has 1807 Blast hits to 1807 proteins in 277 species: Archae - 0; Bacteria - 0; Metazoa - 736; Fungi - 347; Plants - 385; Viruses - 0; Other Eukaryotes - 339 (source: NCBI BLink).	PF02701	PTHR31992	-	-	-	GO:0006355,GO:0003677
6	10715405	1.77e-08	Al27	Potri.006G130500	10704874	10707474	-	3'	7931	6_10715405	7.75203	-	Potri.006G130500	-	PTHR33448,PTHR33448:SF4	-	-	-	-	-	AT5G03110	-	-	-	-	FUNCTIONS IN: molecular_function unknown; INVOLVED IN: biological_process unknown; LOCATED IN: plasma membrane; BEST Arabidopsis thaliana protein match is: protamine P1 family protein (TAIR:AT2G37100.1); Has 81 Blast hits to 73 proteins in 9 species: Archae - 0; Bacteria - 0; Metazoa - 0; Fungi - 0; Plants - 81; Viruses - 0; Other Eukaryotes - 0 (source: NCBI BLink).	-	PTHR33448,PTHR33448:SF4	-	-	-	-
6	10715405	1.77e-08	Al27	Potri.006G130600	10710654	10714708	-	3'	697	6_10715405	7.75203	-	Potri.006G130600	-	PTHR33476	-	-	-	-	-	AT3G09730	-	-	-	-	unknown protein; FUNCTIONS IN: molecular_function unknown; INVOLVED IN: biological_process unknown; EXPRESSED IN: 18 plant structures; EXPRESSED DURING: 9 growth stages.	-	PTHR33476	-	-	-	-
6	10715405	1.77e-08	Al27	Potri.006G130700	10717085	10720927	-	5'	1680	6_10715405	7.75203	-	Potri.006G130700	PF01569	PTHR11247	KOG3146	3.1.3.4	K07252	-	-	AT5G03080	-	Phosphatidic acid phosphatase (PAP2) family protein	Phosphatidic acid phosphatase (PAP2) family protein	Encodes a phosphatidic acid phosphatase that can be detected in chloroplast membrane fractions. This gene, LPPgamma appears to be more important for diacylglycerol formation than LPPepsilon1 and LPPepsilon2 in the plastids. Heterozygous lppgamma mutants produce pollen that have defects in pollen tube germination and no homozygous mutants have been recovered.	Phosphatidic acid phosphatase (PAP2) family protein; FUNCTIONS IN: catalytic activity; INVOLVED IN: biological_process unknown; LOCATED IN: membrane; EXPRESSED IN: 23 plant structures; EXPRESSED DURING: 14 growth stages; CONTAINS InterPro DOMAIN/s: Phosphatidic acid phosphatase type 2/haloperoxidase (InterPro:IPR000326); Has 881 Blast hits to 875 proteins in 378 species: Archae - 15; Bacteria - 4…	PF01569	PTHR11247	KOG3146	3.1.3.4	K07252	-
6	10715405	1.77e-08	Al27	Potri.006G130800	10725099	10728457	+	5'	9694	6_10715405	7.75203	-	Potri.006G130800	PF00514	PTHR23316,PTHR23316:SF1	-	-	-	GO:0005515	-	AT5G03070	IMPA-9	importin alpha isoform 9	importin alpha isoform 9	Putative importin alpha isoform. When overexpressed can rescue the impa-4 decreased transformation susceptibility phenotype.	importin alpha isoform 9 (IMPA-9); FUNCTIONS IN: binding; INVOLVED IN: biological_process unknown; LOCATED IN: chloroplast; EXPRESSED IN: 24 plant structures; EXPRESSED DURING: 13 growth stages; CONTAINS InterPro DOMAIN/s: Armadillo-like helical (InterPro:IPR011989), Armadillo (InterPro:IPR000225), Armadillo-type fold (InterPro:IPR016024); BEST Arabidopsis thaliana protein match is: importin alph…	PF00514	PTHR23316,PTHR23316:SF1	KOG0166	-	-	GO:0005515
16	14411106	1.82e-08	Al27	Potri.016G143200	14403809	14408623	+	3'	2483	16_14411106	7.73993	-	Potri.016G143200	PF07714	PTHR27001,PTHR27001:SF136	KOG1187	2.7.11.1	-	GO:0006468,GO:0004672	-	AT5G01020	-	Protein kinase superfamily protein	Protein kinase superfamily protein	-	Protein kinase superfamily protein; FUNCTIONS IN: protein serine/threonine kinase activity, protein kinase activity, kinase activity, ATP binding; INVOLVED IN: protein amino acid phosphorylation, N-terminal protein myristoylation; LOCATED IN: plasma membrane; EXPRESSED IN: 22 plant structures; EXPRESSED DURING: 13 growth stages; CONTAINS InterPro DOMAIN/s: Protein kinase, ATP binding site (InterP…	PF07714	PTHR27001,PTHR27001:SF136	KOG1187	2.7.11.1	-	GO:0006468,GO:0004672
16	14411106	1.82e-08	Al27	Potri.016G143300	14406791	14407418	-	3'	3688	16_14411106	7.73993	-	Potri.016G143300	-	-	-	-	-	-	-	-	-	-	-	-	-	-	-	-	-	-	-
16	14411106	1.82e-08	Al27	Potri.016G143400	14408940	14409727	+	3'	1379	16_14411106	7.73993	-	Potri.016G143400	-	PTHR33786,PTHR33786:SF1	-	-	-	-	-	AT5G01015	-	-	-	-	unknown protein; FUNCTIONS IN: molecular_function unknown; INVOLVED IN: biological_process unknown; LOCATED IN: endomembrane system; EXPRESSED IN: 23 plant structures; EXPRESSED DURING: 13 growth stages; BEST Arabidopsis thaliana protein match is: unknown protein (TAIR:AT1G65295.1); Has 30201 Blast hits to 17322 proteins in 780 species: Archae - 12; Bacteria - 1396; Metazoa - 17338; Fungi - 3422;…	-	PTHR33786,PTHR33786:SF1	-	-	-	-
16	14411106	1.82e-08	Al27	Potri.016G143500	14420276	14421414	+	5'	9170	16_14411106	7.73993	-	Potri.016G143500	PF04525	PTHR31087,PTHR31087:SF23	-	-	-	-	-	AT5G41590	-	Protein of unknown function (DUF567)	Protein of unknown function (DUF567)	-	Protein of unknown function (DUF567); CONTAINS InterPro DOMAIN/s: Protein of unknown function DUF567 (InterPro:IPR007612); BEST Arabidopsis thaliana protein match is: Protein of unknown function (DUF567) (TAIR:AT2G38640.1); Has 1807 Blast hits to 1807 proteins in 277 species: Archae - 0; Bacteria - 0; Metazoa - 736; Fungi - 347; Plants - 385; Viruses - 0; Other Eukaryotes - 339 (source: NCBI BLin…	PF04525	PTHR31087,PTHR31087:SF14	-	-	-	-
4	17397149	1.82e-08	Cu65	Potri.004G151900	17391460	17392494	+	3'	4655	4_17397149	7.73993	-	Potri.004G151900	-	-	-	-	-	-	-	AT4G36730	GBF1	G-box binding factor 1	G-box binding factor 1	member of a gene family encoding basic leucine zipper proteins (GBFs) which bind the G-box	G-box binding factor 1 (GBF1); CONTAINS InterPro DOMAIN/s: Basic-leucine zipper (bZIP) transcription factor (InterPro:IPR004827), G-box binding, MFMR (InterPro:IPR012900), bZIP transcription factor, bZIP-1 (InterPro:IPR011616); BEST Arabidopsis thaliana protein match is: basic region/leucine zipper transcription factor 16 (TAIR:AT2G35530.1); Has 3891 Blast hits to 3827 proteins in 347 species: Ar…	PF00170,PF07777	PTHR22952,PTHR22952:SF123	KOG3119	-	K09060	GO:0043565,GO:0006355,GO:0003700
4	17397149	1.82e-08	Cu65	Potri.004G152000	17394422	17397013	-	3'	136	4_17397149	7.73993	-	Potri.004G152000	PF13041,PF01535	PTHR24015,PTHR24015:SF714	-	-	-	-	-	AT3G18840	-	Tetratricopeptide repeat (TPR)-like superfamily protein	Tetratricopeptide repeat (TPR)-like superfamily protein	-	Tetratricopeptide repeat (TPR)-like superfamily protein; CONTAINS InterPro DOMAIN/s: Pentatricopeptide repeat (InterPro:IPR002885); BEST Arabidopsis thaliana protein match is: Pentatricopeptide repeat (PPR) superfamily protein (TAIR:AT2G13600.1); Has 42936 Blast hits to 13106 proteins in 190 species: Archae - 0; Bacteria - 3; Metazoa - 51; Fungi - 30; Plants - 42456; Viruses - 0; Other Eukaryotes…	PF13041,PF01535	PTHR24015,PTHR24015:SF714	-	-	-	-
4	17397149	1.82e-08	Cu65	Potri.004G152100	17397729	17401939	-	5'	580	4_17397149	7.73993	-	Potri.004G152100	PF00294	PTHR10584,PTHR10584:SF188	KOG2855	-	-	-	-	AT1G49350	-	pfkB-like carbohydrate kinase family protein	pfkB-like carbohydrate kinase family protein	-	pfkB-like carbohydrate kinase family protein; FUNCTIONS IN: kinase activity, ribokinase activity; INVOLVED IN: D-ribose metabolic process; LOCATED IN: cellular_component unknown; EXPRESSED IN: 22 plant structures; EXPRESSED DURING: 13 growth stages; CONTAINS InterPro DOMAIN/s: Carbohydrate/purine kinase (InterPro:IPR011611), Ribokinase (InterPro:IPR002139), Carbohydrate/puine kinase, PfkB, conser…	PF00294	PTHR10584,PTHR10584:SF188	KOG2855	2.7.1.83	-	-
16	5564967	1.85e-08	Ni60	Potri.016G073600	5559022	5559258	-	3'	5709	16_5564967	7.73283	-	Potri.016G073600	-	-	-	-	-	-	-	-	-	-	-	-	-	-	-	-	-	-	-
16	5564967	1.85e-08	Ni60	Potri.016G073700	5563803	5566081	+	in gene	0	16_5564967	7.73283	-	Potri.016G073700	PF13561	PTHR24322,PTHR24322:SF582	KOG0725	1.1.1.331	-	-	-	AT1G52340	ABA2	NAD(P)-binding Rossmann-fold superfamily protein	NAD(P)-binding Rossmann-fold superfamily protein	Encodes a cytosolic short-chain dehydrogenase/reductase involved in the conversion of xanthoxin to ABA-aldehyde during ABA biosynthesis. Mutants are insensitive to sucrose and glucose.	ABA DEFICIENT 2 (ABA2); CONTAINS InterPro DOMAIN/s: NAD(P)-binding domain (InterPro:IPR016040), Glucose/ribitol dehydrogenase (InterPro:IPR002347), Short-chain dehydrogenase/reductase SDR (InterPro:IPR002198); BEST Arabidopsis thaliana protein match is: NAD(P)-binding Rossmann-fold superfamily protein (TAIR:AT3G51680.1); Has 120353 Blast hits to 120130 proteins in 3578 species: Archae - 983; Bact…	PF13561	PTHR24322,PTHR24322:SF301	KOG0725	1.1.1.288	K09841	-
16	5564967	1.85e-08	Ni60	Potri.016G073800	5574183	5575238	-	5'	9216	16_5564967	7.73283	-	Potri.016G073800	PF13561	PTHR24322,PTHR24322:SF582	KOG0725	1.1.1.331	-	-	-	AT1G52340	ABA2	NAD(P)-binding Rossmann-fold superfamily protein	NAD(P)-binding Rossmann-fold superfamily protein	Encodes a cytosolic short-chain dehydrogenase/reductase involved in the conversion of xanthoxin to ABA-aldehyde during ABA biosynthesis. Mutants are insensitive to sucrose and glucose.	ABA DEFICIENT 2 (ABA2); CONTAINS InterPro DOMAIN/s: NAD(P)-binding domain (InterPro:IPR016040), Glucose/ribitol dehydrogenase (InterPro:IPR002347), Short-chain dehydrogenase/reductase SDR (InterPro:IPR002198); BEST Arabidopsis thaliana protein match is: NAD(P)-binding Rossmann-fold superfamily protein (TAIR:AT3G51680.1); Has 120353 Blast hits to 120130 proteins in 3578 species: Archae - 983; Bact…	PF13561	PTHR24322,PTHR24322:SF301	KOG0725	1.1.1.288	K09841	-
1	1186	1.87e-08	Na23	Potri.001G000100	1660	2502	-	5'	474	1_1186	7.72816	-
1	1186	1.87e-08	Na23	Potri.001G000200	2906	6646	-	5'	1720	1_1186	7.72816	-	Potri.001G000200	PF14111	PTHR31286,PTHR31286:SF2	-	3.5.1.28,3.2.1.96	-	-	-	AT2G01050	-	zinc ion binding;nucleic acid binding	zinc ion binding;nucleic acid binding	-	zinc ion binding;nucleic acid binding; FUNCTIONS IN: zinc ion binding, nucleic acid binding; INVOLVED IN: biological_process unknown; LOCATED IN: cellular_component unknown; CONTAINS InterPro DOMAIN/s: Zinc finger, CCHC-type (InterPro:IPR001878); BEST Arabidopsis thaliana protein match is: unknown protein (TAIR:AT3G31430.1); Has 369 Blast hits to 365 proteins in 15 species: Archae - 0; Bacteria -…	PF14392,PF14111	PTHR31286,PTHR31286:SF7	-	-	-	-
1	1186	1.87e-08	Na23	Potri.001G000400	8391	12483	-	5'	7205	1_1186	7.72816	-	Potri.001G000400	PF11779	PTHR33727	-	-	-	-	-	AT2G30942	-	Protein of unknown function (DUF3317)	Protein of unknown function (DUF3317)	-	Protein of unknown function (DUF3317); BEST Arabidopsis thaliana protein match is: Protein of unknown function (DUF3317) (TAIR:AT1G06515.2); Has 35333 Blast hits to 34131 proteins in 2444 species: Archae - 798; Bacteria - 22429; Metazoa - 974; Fungi - 991; Plants - 531; Viruses - 0; Other Eukaryotes - 9610 (source: NCBI BLink).	PF11779	PTHR33727	-	-	-	-
1	1186	1.87e-08	Na23	Potri.001G000300	8391	8860	+	5'	7205	1_1186	7.72816	-	Potri.001G000300	-	-	-	-	-	-	-	-	-	-	-	-	-	-	-	-	-	-	-
7	4536592	1.96e-08	Al27	Potri.007G048500	4535494	4538823	-	in gene	0	7_4536592	7.70774	-	Potri.007G048500	PF16900,PF05970	PTHR10492	-	-	K07466	GO:0006281,GO:0003678,GO:0000723	-	AT5G28780	-	PIF1 helicase	PIF1 helicase	-	PIF1 helicase; CONTAINS InterPro DOMAIN/s: DNA helicase PIF1, ATP-dependent (InterPro:IPR010285); BEST Arabidopsis thaliana protein match is: PIF1 helicase (TAIR:AT3G51690.1); Has 1364 Blast hits to 1355 proteins in 303 species: Archae - 2; Bacteria - 367; Metazoa - 234; Fungi - 111; Plants - 389; Viruses - 9; Other Eukaryotes - 252 (source: NCBI BLink).	PF05970	PTHR10492	-	3.6.4.12	K15255	GO:0006281,GO:0003678,GO:0000723
5	2640897	1.98e-08	Na23	Potri.005G035700	2635670	2639276	+	3'	1621	5_2640897	7.70333	-	Potri.005G035700	PF00931	PTHR23155,PTHR23155:SF592	KOG4658	-	K13457	GO:0043531	-	AT3G07040	RPM1	NB-ARC domain-containing disease resistance protein	NB-ARC domain-containing disease resistance protein	Contains an N-terminal tripartite nucleotide binding site and a C-terminal tandem array of leucine-rich repeats. Confers resistance to Pseudomonas syringae strains that carry the avirulence genes avrB and avrRpm1.	RESISTANCE TO P. SYRINGAE PV MACULICOLA 1 (RPM1); FUNCTIONS IN: protein binding, nucleotide binding; INVOLVED IN: defense response, plant-type hypersensitive response; LOCATED IN: plasma membrane; EXPRESSED IN: 20 plant structures; EXPRESSED DURING: 13 growth stages; CONTAINS InterPro DOMAIN/s: NB-ARC (InterPro:IPR002182), Leucine-rich repeat (InterPro:IPR001611), Disease resistance protein (Inte…	PF00931	PTHR23155,PTHR23155:SF458	-	-	K13457	GO:0043531
5	2640897	1.98e-08	Na23	Potri.005G035800	2642533	2645402	-	5'	1636	5_2640897	7.70333	-	Potri.005G035800	PF00808	PTHR10252,PTHR10252:SF49	KOG1657	-	K08066	-	NF-YC	AT1G08970	HAP5C	nuclear factor Y, subunit C9	nuclear factor Y, subunit C9	heme activated protein (HAP5c)	nuclear factor Y, subunit C9 (NF-YC9); CONTAINS InterPro DOMAIN/s: Transcription factor CBF/NF-Y/archaeal histone (InterPro:IPR003958), Histone-fold (InterPro:IPR009072); BEST Arabidopsis thaliana protein match is: nuclear factor Y, subunit C3 (TAIR:AT1G54830.3); Has 35333 Blast hits to 34131 proteins in 2444 species: Archae - 798; Bacteria - 22429; Metazoa - 974; Fungi - 991; Plants - 531; Virus…	PF00808	PTHR10252,PTHR10252:SF48	KOG1657	-	K08066	-
5	2640897	1.98e-08	Na23	Potri.005G035900	2647148	2649138	+	5'	6251	5_2640897	7.70333	-	Potri.005G035900	PF14432,PF13041,PF01535	PTHR24015	-	-	-	-	-	AT1G74630	-	Tetratricopeptide repeat (TPR)-like superfamily protein	Tetratricopeptide repeat (TPR)-like superfamily protein	-	Tetratricopeptide repeat (TPR)-like superfamily protein; INVOLVED IN: biological_process unknown; LOCATED IN: endomembrane system; EXPRESSED IN: leaf whorl, flower, seed; EXPRESSED DURING: petal differentiation and expansion stage, E expanded cotyledon stage; CONTAINS InterPro DOMAIN/s: Pentatricopeptide repeat (InterPro:IPR002885); BEST Arabidopsis thaliana protein match is: Tetratricopeptide re…	PF14432,PF13041,PF01535	PTHR24015,PTHR24015:SF464	-	-	-	-
5	2640897	1.98e-08	Na23	Potri.005G036000	2649198	2649928	-	5'	8301	5_2640897	7.70333	-
3	6129818	1.98e-08	Fe57	Potri.003G045700	6131565	6136772	+	5'	1747	3_6129818	7.70333	-	Potri.003G045700	PF00037,PF04068,PF00005	PTHR19248	-	3.6.3.25	K06174	GO:0016887,GO:0005524	-	AT4G19210	ATRLI2	RNAse l inhibitor protein 2	RNAse l inhibitor protein 2	member of RLI subfamily	RNAse l inhibitor protein 2 (RLI2); FUNCTIONS IN: transporter activity; EXPRESSED IN: 26 plant structures; EXPRESSED DURING: 15 growth stages; CONTAINS InterPro DOMAIN/s: ABC transporter-like (InterPro:IPR003439), 4Fe-4S binding domain (InterPro:IPR001450), ATPase, AAA+ type, core (InterPro:IPR003593), 4Fe-4S ferredoxin, iron-sulpur binding domain (InterPro:IPR017896), 4Fe-4S ferredoxin, iron-sul…	PF00037,PF04068,PF00005	PTHR19248	-	3.6.3.19	K06174	GO:0016887,GO:0005524
6	25345821	1.99e-08	Mo98	Potri.006G245900	25337833	25339670	-	3'	6151	6_25345821	7.70115	-	Potri.006G245900	PF16983	PTHR31970,PTHR31970:SF3	-	-	-	-	-	AT2G25680	MOT1	molybdate transporter 1	molybdate transporter 1	Encodes a high-affinity molybdate transporter. Mutant has reduced concentrations of molybdate in roots and shoots, and reduced shoot and root length when growing on Mo-limited medium.	molybdate transporter 1 (MOT1); FUNCTIONS IN: molybdate ion transmembrane transporter activity, sulfate transmembrane transporter activity; INVOLVED IN: molybdate ion transport; LOCATED IN: mitochondrion, vacuole; EXPRESSED IN: 13 plant structures; EXPRESSED DURING: LP.04 four leaves visible, 4 anthesis, petal differentiation and expansion stage; BEST Arabidopsis thaliana protein match is: sulfat…	PF16983	PTHR31970,PTHR31970:SF3	-	-	-	-
6	25345821	1.99e-08	Mo98	Potri.006G246000	25345115	25347031	+	in gene	0	6_25345821	7.70115	-	Potri.006G246000	PF16983	PTHR31970,PTHR31970:SF3	-	-	-	-	-	AT2G25680	MOT1	molybdate transporter 1	molybdate transporter 1	Encodes a high-affinity molybdate transporter. Mutant has reduced concentrations of molybdate in roots and shoots, and reduced shoot and root length when growing on Mo-limited medium.	molybdate transporter 1 (MOT1); FUNCTIONS IN: molybdate ion transmembrane transporter activity, sulfate transmembrane transporter activity; INVOLVED IN: molybdate ion transport; LOCATED IN: mitochondrion, vacuole; EXPRESSED IN: 13 plant structures; EXPRESSED DURING: LP.04 four leaves visible, 4 anthesis, petal differentiation and expansion stage; BEST Arabidopsis thaliana protein match is: sulfat…	PF16983	PTHR31970,PTHR31970:SF3	-	-	-	-
6	25345821	1.99e-08	Mo98	Potri.006G246100	25350095	25356024	-	5'	4274	6_25345821	7.70115	-	Potri.006G246100	PF01412	PTHR23180,PTHR23180:SF266	KOG0702	-	-	GO:0005096	-	AT4G32630	-	ArfGap/RecO-like zinc finger domain-containing protein	ArfGap/RecO-like zinc finger domain-containing protein	-	ArfGap/RecO-like zinc finger domain-containing protein; FUNCTIONS IN: ARF GTPase activator activity, zinc ion binding; INVOLVED IN: regulation of ARF GTPase activity; LOCATED IN: cellular_component unknown; EXPRESSED IN: 18 plant structures; EXPRESSED DURING: 10 growth stages; CONTAINS InterPro DOMAIN/s: Arf GTPase activating protein (InterPro:IPR001164); BEST Arabidopsis thaliana protein match i…	PF01412	PTHR23180,PTHR23180:SF266	-	-	-	GO:0005096
10	6767286	2.05e-08	Al27	Potri.010G040100	6767103	6773826	+	in gene	0	10_6767286	7.68825	-	Potri.010G040100	PF07059	PTHR31558,PTHR31558:SF3	-	-	-	-	-	AT1G10410	-	Protein of unknown function (DUF1336)	Protein of unknown function (DUF1336)	-	Protein of unknown function (DUF1336); INVOLVED IN: N-terminal protein myristoylation; LOCATED IN: chloroplast; EXPRESSED IN: 24 plant structures; EXPRESSED DURING: 15 growth stages; CONTAINS InterPro DOMAIN/s: Protein of unknown function DUF1336 (InterPro:IPR009769); BEST Arabidopsis thaliana protein match is: Protein of unknown function (DUF1336) (TAIR:AT1G59650.1); Has 292 Blast hits to 292 pr…	PF07059	PTHR31558,PTHR31558:SF3	-	-	-	-
10	6767286	2.05e-08	Al27	Potri.010G040200	6773836	6776147	-	5'	6550	10_6767286	7.68825	-	Potri.010G040200	PF00560,PF13855	PTHR27000,PTHR27000:SF29	KOG0472	2.7.11.1	-	GO:0005515	-	AT4G20140	GSO1	Leucine-rich repeat transmembrane protein kinase	Leucine-rich repeat transmembrane protein kinase	Encodes GASSHO1 (GSO1), a putative leucine-rich repeat transmembrane-type receptor kinase. GSO1 and a homolog GSO2 (At5g44700) are required for the formation of a normal epidermal surface during embryogenesis.	GASSHO1 (GSO1); FUNCTIONS IN: protein serine/threonine kinase activity, protein kinase activity, ATP binding; INVOLVED IN: protein amino acid phosphorylation, transmembrane receptor protein tyrosine kinase signaling pathway, embryo development, epidermis development; LOCATED IN: endomembrane system; EXPRESSED IN: 13 plant structures; EXPRESSED DURING: 8 growth stages; CONTAINS InterPro DOMAIN/s: …	PF08263,PF00560,PF00069,PF13855	PTHR27000,PTHR27000:SF86	KOG1187	2.7.11.1	-	GO:0005515,GO:0006468,GO:0005524,GO:0004672
12	4664498	2.08e-08	Fe57	Potri.012G049200	4658341	4663556	+	3'	942	12_4664498	7.68194	-	Potri.012G049200	PF00400	PTHR19856	-	-	-	GO:0005515	-	AT3G18060	-	transducin family protein / WD-40 repeat family protein	transducin family protein / WD-40 repeat family protein	-	transducin family protein / WD-40 repeat family protein; FUNCTIONS IN: nucleotide binding; INVOLVED IN: biological_process unknown; LOCATED IN: CUL4 RING ubiquitin ligase complex; EXPRESSED IN: 23 plant structures; EXPRESSED DURING: 14 growth stages; CONTAINS InterPro DOMAIN/s: WD40 repeat 2 (InterPro:IPR019782), WD40 repeat, conserved site (InterPro:IPR019775), WD40 repeat (InterPro:IPR001680), …	PF00400	PTHR19856	-	-	-	GO:0005515
12	4664498	2.08e-08	Fe57	Potri.012G049300	4667840	4672376	+	5'	3342	12_4664498	7.68194	-
12	4664498	2.08e-08	Fe57	Potri.012G049400	4670308	4671411	-	5'	5810	12_4664498	7.68194	-
1	891	2.26e-08	Na23	Potri.001G000100	1660	2502	-	5'	769	1_891	7.64589	-
1	891	2.26e-08	Na23	Potri.001G000200	2906	6646	-	5'	2015	1_891	7.64589	-	Potri.001G000200	PF14111	PTHR31286,PTHR31286:SF2	-	3.5.1.28,3.2.1.96	-	-	-	AT2G01050	-	zinc ion binding;nucleic acid binding	zinc ion binding;nucleic acid binding	-	zinc ion binding;nucleic acid binding; FUNCTIONS IN: zinc ion binding, nucleic acid binding; INVOLVED IN: biological_process unknown; LOCATED IN: cellular_component unknown; CONTAINS InterPro DOMAIN/s: Zinc finger, CCHC-type (InterPro:IPR001878); BEST Arabidopsis thaliana protein match is: unknown protein (TAIR:AT3G31430.1); Has 369 Blast hits to 365 proteins in 15 species: Archae - 0; Bacteria -…	PF14392,PF14111	PTHR31286,PTHR31286:SF7	-	-	-	-
1	891	2.26e-08	Na23	Potri.001G000400	8391	12483	-	5'	7500	1_891	7.64589	-	Potri.001G000400	PF11779	PTHR33727	-	-	-	-	-	AT2G30942	-	Protein of unknown function (DUF3317)	Protein of unknown function (DUF3317)	-	Protein of unknown function (DUF3317); BEST Arabidopsis thaliana protein match is: Protein of unknown function (DUF3317) (TAIR:AT1G06515.2); Has 35333 Blast hits to 34131 proteins in 2444 species: Archae - 798; Bacteria - 22429; Metazoa - 974; Fungi - 991; Plants - 531; Viruses - 0; Other Eukaryotes - 9610 (source: NCBI BLink).	PF11779	PTHR33727	-	-	-	-
1	891	2.26e-08	Na23	Potri.001G000300	8391	8860	+	5'	7500	1_891	7.64589	-	Potri.001G000300	-	-	-	-	-	-	-	-	-	-	-	-	-	-	-	-	-	-	-
6	25345479	2.3e-08	Mo98	Potri.006G245900	25337833	25339670	-	3'	5809	6_25345479	7.63827	-	Potri.006G245900	PF16983	PTHR31970,PTHR31970:SF3	-	-	-	-	-	AT2G25680	MOT1	molybdate transporter 1	molybdate transporter 1	Encodes a high-affinity molybdate transporter. Mutant has reduced concentrations of molybdate in roots and shoots, and reduced shoot and root length when growing on Mo-limited medium.	molybdate transporter 1 (MOT1); FUNCTIONS IN: molybdate ion transmembrane transporter activity, sulfate transmembrane transporter activity; INVOLVED IN: molybdate ion transport; LOCATED IN: mitochondrion, vacuole; EXPRESSED IN: 13 plant structures; EXPRESSED DURING: LP.04 four leaves visible, 4 anthesis, petal differentiation and expansion stage; BEST Arabidopsis thaliana protein match is: sulfat…	PF16983	PTHR31970,PTHR31970:SF3	-	-	-	-
6	25345479	2.3e-08	Mo98	Potri.006G246000	25345115	25347031	+	in gene	0	6_25345479	7.63827	-	Potri.006G246000	PF16983	PTHR31970,PTHR31970:SF3	-	-	-	-	-	AT2G25680	MOT1	molybdate transporter 1	molybdate transporter 1	Encodes a high-affinity molybdate transporter. Mutant has reduced concentrations of molybdate in roots and shoots, and reduced shoot and root length when growing on Mo-limited medium.	molybdate transporter 1 (MOT1); FUNCTIONS IN: molybdate ion transmembrane transporter activity, sulfate transmembrane transporter activity; INVOLVED IN: molybdate ion transport; LOCATED IN: mitochondrion, vacuole; EXPRESSED IN: 13 plant structures; EXPRESSED DURING: LP.04 four leaves visible, 4 anthesis, petal differentiation and expansion stage; BEST Arabidopsis thaliana protein match is: sulfat…	PF16983	PTHR31970,PTHR31970:SF3	-	-	-	-
6	25345479	2.3e-08	Mo98	Potri.006G246100	25350095	25356024	-	5'	4616	6_25345479	7.63827	-	Potri.006G246100	PF01412	PTHR23180,PTHR23180:SF266	KOG0702	-	-	GO:0005096	-	AT4G32630	-	ArfGap/RecO-like zinc finger domain-containing protein	ArfGap/RecO-like zinc finger domain-containing protein	-	ArfGap/RecO-like zinc finger domain-containing protein; FUNCTIONS IN: ARF GTPase activator activity, zinc ion binding; INVOLVED IN: regulation of ARF GTPase activity; LOCATED IN: cellular_component unknown; EXPRESSED IN: 18 plant structures; EXPRESSED DURING: 10 growth stages; CONTAINS InterPro DOMAIN/s: Arf GTPase activating protein (InterPro:IPR001164); BEST Arabidopsis thaliana protein match i…	PF01412	PTHR23180,PTHR23180:SF266	-	-	-	GO:0005096
1	20919	2.51e-08	Na23	Potri.001G000400	8391	12483	-	3'	8436	1_20919	7.60033	-	Potri.001G000400	PF11779	PTHR33727	-	-	-	-	-	AT2G30942	-	Protein of unknown function (DUF3317)	Protein of unknown function (DUF3317)	-	Protein of unknown function (DUF3317); BEST Arabidopsis thaliana protein match is: Protein of unknown function (DUF3317) (TAIR:AT1G06515.2); Has 35333 Blast hits to 34131 proteins in 2444 species: Archae - 798; Bacteria - 22429; Metazoa - 974; Fungi - 991; Plants - 531; Viruses - 0; Other Eukaryotes - 9610 (source: NCBI BLink).	PF11779	PTHR33727	-	-	-	-
28	492630	2.61e-08	Al27	Potri.T020900	495873	496429	-	5'	3243	28_492630	7.58336	-	Potri.T020900	PF00069	PTHR24356,PTHR24356:SF206	-	2.7.11.1	-	GO:0006468,GO:0005524,GO:0004672	-	AT2G19400	-	AGC (cAMP-dependent, cGMP-dependent and protein kinase C) kinase family protein	AGC (cAMP-dependent, cGMP-dependent and protein kinase C) kinase family protein	-	AGC (cAMP-dependent, cGMP-dependent and protein kinase C) kinase family protein; FUNCTIONS IN: kinase activity; INVOLVED IN: protein amino acid phosphorylation; LOCATED IN: cellular_component unknown; EXPRESSED IN: 9 plant structures; EXPRESSED DURING: 6 growth stages; CONTAINS InterPro DOMAIN/s: Protein kinase, ATP binding site (InterPro:IPR017441), Serine/threonine-protein kinase domain (InterP…	PF00433,PF07714,PF00069	PTHR24356,PTHR24356:SF182	-	2.7.11.1	-	GO:0006468,GO:0005524,GO:0004674,GO:0004672
5	20462148	2.7e-08	Al27	Potri.005G187300	20456652	20460388	-	3'	1760	5_20462148	7.56864	-	Potri.005G187300	PF03083	PTHR10791,PTHR10791:SF44	KOG1623	-	K15382	-	-	AT1G21460	-	Nodulin MtN3 family protein	Nodulin MtN3 family protein	-	Nodulin MtN3 family protein; INVOLVED IN: biological_process unknown; LOCATED IN: endomembrane system, integral to membrane, membrane; EXPRESSED IN: 24 plant structures; EXPRESSED DURING: 14 growth stages; CONTAINS InterPro DOMAIN/s: MtN3/saliva-related transmembrane protein, conserved region (InterPro:IPR018169), RAG1-activating protein 1 homologue (InterPro:IPR018179), RAG1-activating protein-1…	PF03083	PTHR10791,PTHR10791:SF44	KOG1623	-	K15382	-
2	1548133	3.11e-08	Al27	Potri.002G024600	1544130	1546757	-	3'	1376	2_1548133	7.50724	-	Potri.002G024600	-	PTHR12709,PTHR12709:SF5	-	-	-	-	-	AT1G75670	-	DNA-directed RNA polymerases	DNA-directed RNA polymerases	-	DNA-directed RNA polymerases; FUNCTIONS IN: DNA-directed RNA polymerase activity; INVOLVED IN: transcription; LOCATED IN: cellular_component unknown; EXPRESSED IN: 22 plant structures; EXPRESSED DURING: 13 growth stages; CONTAINS InterPro DOMAIN/s: RNA polymerase Rpb7, N-terminal (InterPro:IPR005576); Has 67 Blast hits to 67 proteins in 26 species: Archae - 0; Bacteria - 0; Metazoa - 0; Fungi - 6…	PF03876	PTHR12709,PTHR12709:SF5	-	-	-	GO:0006351,GO:0003899
2	1548133	3.11e-08	Al27	Potri.002G024700	1554518	1560573	+	5'	6385	2_1548133	7.50724	-	Potri.002G024700	PF02309,PF02362,PF06507	PTHR31384,PTHR31384:SF10	-	-	K14486	GO:0006355,GO:0005634,GO:0003677,GO:0009725	ARF	AT1G19850	ARF5	Transcriptional factor B3 family protein / auxin-responsive factor AUX/IAA-related	Transcriptional factor B3 family protein / auxin-responsive factor AUX/IAA-related	Encodes a transcription factor (IAA24) mediating embryo axis formation and vascular development. Similar to AUXIN RESPONSIVE FACTOR 1 (ARF1) shown to bind to auxin responsive elements (AREs), and to the maize transcriptional activator VIVIPAROUS 1( VP1). In situ hybridization shows expression in provascular tissue of embryos, the emerging shoot primordia, then is restricted to provascular tissue,…	MONOPTEROS (MP); FUNCTIONS IN: sequence-specific DNA binding transcription factor activity, promoter binding; INVOLVED IN: in 8 processes; LOCATED IN: nucleus, membrane; EXPRESSED IN: 21 plant structures; EXPRESSED DURING: 11 growth stages; CONTAINS InterPro DOMAIN/s: Aux/IAA-ARF-dimerisation (InterPro:IPR011525), Transcriptional factor B3 (InterPro:IPR003340), AUX/IAA protein (InterPro:IPR003311…	PF02309,PF02362,PF06507	PTHR31384,PTHR31384:SF10	-	-	K14486	GO:0006355,GO:0005634,GO:0003677,GO:0009725
2	10038397	3.15e-08	Na23	Potri.002G134600	10029122	10034773	-	3'	3624	2_10038397	7.50169	-	Potri.002G134600	PF13238	PTHR23359,PTHR23359:SF100	KOG3079	2.7.4.25,2.7.4.22,2.7.4.14	K13800	GO:0019205,GO:0006139,GO:0005524	-	AT5G26667	PYR6	P-loop containing nucleoside triphosphate hydrolases superfamily protein	P-loop containing nucleoside triphosphate hydrolases superfamily protein	encodes a uridine 5'-monophosphate (UMP)/cytidine 5'-monophosphate (CMP) kinase.	PYR6; FUNCTIONS IN: uridylate kinase activity, cytidylate kinase activity; INVOLVED IN: pyrimidine ribonucleoside monophosphate metabolic process; LOCATED IN: cellular_component unknown; EXPRESSED IN: male gametophyte, cultured cell; EXPRESSED DURING: seed development stages; CONTAINS InterPro DOMAIN/s: UMP-CMP kinase (InterPro:IPR006266), Adenylate kinase (InterPro:IPR000850); BEST Arabidopsis t…	PF13238	PTHR23359,PTHR23359:SF100	KOG3079	2.7.4.25,2.7.4.22,2.7.4.14	K13800	GO:0019205,GO:0006139,GO:0005524
2	10038397	3.15e-08	Na23	Potri.002G134700	10030168	10031157	+	3'	7240	2_10038397	7.50169	-	Potri.002G134700	-	-	-	-	-	-	-	-	-	-	-	-	-	-	-	-	-	-	-
2	10038397	3.15e-08	Na23	Potri.002G134800	10038427	10040300	+	5'	30	2_10038397	7.50169	-	Potri.002G134800	PF08510	PTHR21726	KOG2257	2.4.1.198	K03861	-	-	AT2G39445	-	Phosphatidylinositol N-acetylglucosaminyltransferase, GPI19/PIG-P subunit	Phosphatidylinositol N-acetylglucosaminyltransferase, GPI19/PIG-P subunit	-	Phosphatidylinositol N-acetylglucosaminyltransferase, GPI19/PIG-P subunit; FUNCTIONS IN: molecular_function unknown; INVOLVED IN: biological_process unknown; LOCATED IN: chloroplast; CONTAINS InterPro DOMAIN/s: PIG-P (InterPro:IPR013717), Phosphatidylinositol N-acetylglucosaminyltransferase, GPI19/PIG-P subunit (InterPro:IPR016542); BEST Arabidopsis thaliana protein match is: Phosphatidylinositol…	PF08510	PTHR21726	KOG2257	2.4.1.198	K03861	-
2	10038397	3.15e-08	Na23	Potri.002G134900	10039491	10045496	-	5'	1094	2_10038397	7.50169	-	Potri.002G134900	PF06858	PTHR11702,PTHR11702:SF28	-	-	K06943	GO:0005525	-	AT1G80770	PDE318	P-loop containing nucleoside triphosphate hydrolases superfamily protein	P-loop containing nucleoside triphosphate hydrolases superfamily protein	-	pigment defective 318 (PDE318); FUNCTIONS IN: ferrous iron transmembrane transporter activity, GTP binding; INVOLVED IN: ferrous iron transport; LOCATED IN: integral to membrane; EXPRESSED IN: 21 plant structures; EXPRESSED DURING: 13 growth stages; CONTAINS InterPro DOMAIN/s: GTP1/OBG (InterPro:IPR006073), Nucleolar GTP-binding 1 (InterPro:IPR010674), Ferrous iron transport protein B, N-terminal…	PF06858	PTHR11702,PTHR11702:SF28	-	-	K06943	GO:0005525
2	10038397	3.15e-08	Na23	Potri.002G135000	10047591	10048565	+	5'	9194	2_10038397	7.50169	-
12	13878622	3.22e-08	Cu65	Potri.012G118200	13871751	13875136	+	3'	3486	12_13878622	7.49214	-	Potri.012G118200	PF02536	PTHR13068,PTHR13068:SF7	KOG1267	-	-	GO:0006355,GO:0005739,GO:0003690	-	AT4G19650	-	Mitochondrial transcription termination factor family protein	Mitochondrial transcription termination factor family protein	-	Mitochondrial transcription termination factor family protein; CONTAINS InterPro DOMAIN/s: Mitochodrial transcription termination factor-related (InterPro:IPR003690); BEST Arabidopsis thaliana protein match is: mitochondrial transcription termination factor-related / mTERF-related (TAIR:AT5G45113.1); Has 236 Blast hits to 231 proteins in 19 species: Archae - 0; Bacteria - 2; Metazoa - 5; Fungi - …	PF02536	PTHR13068,PTHR13068:SF7	KOG1267	-	-	GO:0006355,GO:0005739,GO:0003690
12	13878622	3.22e-08	Cu65	Potri.012G118300	13876736	13879884	-	in gene	0	12_13878622	7.49214	-	Potri.012G118300	PF12796,PF12313	PTHR24413,PTHR24413:SF124	-	-	-	-	-	AT5G45110	ATNPR3	NPR1-like protein 3	NPR1-like protein 3	Encodes NPR3, a paralog of NPR1. Involved in negative regulation of defense responses against bacterial and oomycete pathogens. npr3 mutants has elevated level of PR1 expression. Interacts with TGA2, TGA3, TGA5 and TGA6 in yeast two hybrid assays. NPR3 and NPR4 are receptors for the immune signal salicylic acid.	NPR1-like protein 3 (NPR3); INVOLVED IN: defense response to fungus, incompatible interaction, defense response to bacterium, incompatible interaction; LOCATED IN: chloroplast; EXPRESSED IN: 23 plant structures; EXPRESSED DURING: 13 growth stages; CONTAINS InterPro DOMAIN/s: BTB/POZ (InterPro:IPR013069), NPR1/NIM1 like, C-terminal (InterPro:IPR021094), BTB/POZ fold (InterPro:IPR011333), Ankyrin r…	PF13857,PF11900,PF00651,PF12313	PTHR24413,PTHR24413:SF124	-	-	K14508	GO:0005515
12	13878622	3.22e-08	Cu65	Potri.012G118400	13879898	13880590	+	5'	1276	12_13878622	7.49214	-	Potri.012G118400	PF02536	PTHR13068,PTHR13068:SF7	-	-	-	GO:0006355,GO:0005739,GO:0003690	-	AT4G19650	-	Mitochondrial transcription termination factor family protein	Mitochondrial transcription termination factor family protein	-	Mitochondrial transcription termination factor family protein; CONTAINS InterPro DOMAIN/s: Mitochodrial transcription termination factor-related (InterPro:IPR003690); BEST Arabidopsis thaliana protein match is: mitochondrial transcription termination factor-related / mTERF-related (TAIR:AT5G45113.1); Has 236 Blast hits to 231 proteins in 19 species: Archae - 0; Bacteria - 2; Metazoa - 5; Fungi - …	PF02536	PTHR13068,PTHR13068:SF7	KOG1267	-	-	GO:0006355,GO:0005739,GO:0003690
12	13878622	3.22e-08	Cu65	Potri.012G118500	13883601	13887986	-	5'	4979	12_13878622	7.49214	-	Potri.012G118500	PF00651,PF11900,PF12313	PTHR24413,PTHR24413:SF124	-	-	K14508	GO:0005515	-	AT5G45110	ATNPR3	NPR1-like protein 3	NPR1-like protein 3	Encodes NPR3, a paralog of NPR1. Involved in negative regulation of defense responses against bacterial and oomycete pathogens. npr3 mutants has elevated level of PR1 expression. Interacts with TGA2, TGA3, TGA5 and TGA6 in yeast two hybrid assays. NPR3 and NPR4 are receptors for the immune signal salicylic acid.	NPR1-like protein 3 (NPR3); INVOLVED IN: defense response to fungus, incompatible interaction, defense response to bacterium, incompatible interaction; LOCATED IN: chloroplast; EXPRESSED IN: 23 plant structures; EXPRESSED DURING: 13 growth stages; CONTAINS InterPro DOMAIN/s: BTB/POZ (InterPro:IPR013069), NPR1/NIM1 like, C-terminal (InterPro:IPR021094), BTB/POZ fold (InterPro:IPR011333), Ankyrin r…	PF13857,PF11900,PF00651,PF12313	PTHR24413,PTHR24413:SF124	-	-	K14508	GO:0005515
3	20100693	3.45e-08	Al27	Potri.003G198300	20086223	20092588	-	3'	8105	3_20100693	7.46218	-	Potri.003G198300	PF00168,PF01412	PTHR23180,PTHR23180:SF249	KOG1030	-	K12486	GO:0005515,GO:0005096	-	AT3G07940	-	Calcium-dependent ARF-type GTPase activating protein family	Calcium-dependent ARF-type GTPase activating protein family	-	Calcium-dependent ARF-type GTPase activating protein family; FUNCTIONS IN: ARF GTPase activator activity, zinc ion binding; INVOLVED IN: regulation of ARF GTPase activity; LOCATED IN: cellular_component unknown; EXPRESSED IN: 18 plant structures; EXPRESSED DURING: 11 growth stages; CONTAINS InterPro DOMAIN/s: Arf GTPase activating protein (InterPro:IPR001164), C2 membrane targeting protein (Inter…	PF00168,PF01412	PTHR23180,PTHR23180:SF249	KOG1030	-	K12486	GO:0005515,GO:0005096
3	20100693	3.45e-08	Al27	Potri.003G198400	20093771	20099687	-	3'	1006	3_20100693	7.46218	-	Potri.003G198400	PF00664,PF00005	PTHR24223,PTHR24223:SF245	-	3.6.3.44	-	GO:0055085,GO:0042626,GO:0016021,GO:0006810,GO:0005524,GO:0016887	-	AT3G13080	ATMRP3	multidrug resistance-associated protein 3	multidrug resistance-associated protein 3	encodes an ATP-dependent MRP-like ABC transporter able to transport glutathione-conjugates as well as chlorophyll catabolites. The expression of this gene is upregulated by herbicide safeners such as benoxacor and fenclorim.	multidrug resistance-associated protein 3 (MRP3); FUNCTIONS IN: chlorophyll catabolite transmembrane transporter activity, ATPase activity, coupled to transmembrane movement of substances, glutathione S-conjugate-exporting ATPase activity; INVOLVED IN: transport, transmembrane transport; LOCATED IN: apoplast, vacuolar membrane, plasma membrane, plant-type vacuole; EXPRESSED IN: 6 plant structures…	PF00005,PF00664	PTHR24223,PTHR24223:SF181	-	3.6.3.44	-	GO:0016887,GO:0005524,GO:0055085,GO:0042626,GO:0016021,GO:0006810
3	20100693	3.45e-08	Al27	Potri.003G198500	20101437	20104165	+	5'	744	3_20100693	7.46218	-	Potri.003G198500	PF00156,PF00215	PTHR19278,PTHR19278:SF39	KOG1377	4.1.1.23,2.4.2.10	K13421	GO:0009116,GO:0006207,GO:0004590	-	AT3G54470	-	uridine 5'-monophosphate synthase / UMP synthase (PYRE-F) (UMPS)	uridine 5'-monophosphate synthase / UMP synthase (PYRE-F) (UMPS)	encodes the bi-functional orotate phosphoribosyltransferase/orotidine-5'-phosphate decarboxylase catalyzing the fifth and sixth step in the de novo pyrimidine ribonucleotide biosynthesis	uridine 5'-monophosphate synthase / UMP synthase (PYRE-F) (UMPS); FUNCTIONS IN: orotate phosphoribosyltransferase activity, orotidine-5'-phosphate decarboxylase activity; INVOLVED IN: response to cadmium ion, cellular response to phosphate starvation, pyrimidine ribonucleotide biosynthetic process, nucleoside metabolic process; LOCATED IN: cellular_component unknown; EXPRESSED IN: guard cell, cul…	PF00156,PF00215	PTHR19278,PTHR19278:SF39	KOG1377	4.1.1.23,2.4.2.10	K13421	GO:0009116,GO:0006207,GO:0004590
3	20100693	3.45e-08	Al27	Potri.003G198600	20105067	20109406	-	5'	4374	3_20100693	7.46218	-	Potri.003G198600	PF03145	PTHR10315,PTHR10315:SF29	KOG3002	6.3.2.19	K04506	GO:0007275,GO:0006511,GO:0005634	-	AT3G61790	-	Protein with RING/U-box and TRAF-like domains	Protein with RING/U-box and TRAF-like domains	-	Protein with RING/U-box and TRAF-like domains; FUNCTIONS IN: ubiquitin-protein ligase activity, zinc ion binding; INVOLVED IN: multicellular organismal development, ubiquitin-dependent protein catabolic process, protein ubiquitination; LOCATED IN: nucleus; EXPRESSED IN: 24 plant structures; EXPRESSED DURING: 13 growth stages; CONTAINS InterPro DOMAIN/s: TRAF-like (InterPro:IPR008974), Seven-in-ab…	PF03145	PTHR10315,PTHR10315:SF34	KOG3002	6.3.2.19	K04506	GO:0007275,GO:0006511,GO:0005634
7	9473237	3.5e-08	Co59	Potri.007G072200	9468081	9472152	-	3'	1085	7_9473237	7.45593	-	Potri.007G072200	PF01107	PTHR33054	-	-	-	-	-	-	-	-	-	-	-	-	-	-	-	-	-
10	13618946	3.51e-08	Al27	Potri.010G118800	13608221	13609740	-	3'	9206	10_13618946	7.45469	-	Potri.010G118800	-	-	-	-	-	-	-	-	-	-	-	-	-	-	-	-	-	-	-
10	13618946	3.51e-08	Al27	Potri.010G118900	13611068	13615314	-	3'	3632	10_13618946	7.45469	-	Potri.010G118900	PF11976	PTHR10562,PTHR10562:SF15	KOG1769	-	-	-	-	AT1G68185	-	Ubiquitin-like superfamily protein	Ubiquitin-like superfamily protein	-	Ubiquitin-like superfamily protein; CONTAINS InterPro DOMAIN/s: Ubiquitin supergroup (InterPro:IPR019955); Has 482 Blast hits to 482 proteins in 153 species: Archae - 0; Bacteria - 0; Metazoa - 186; Fungi - 88; Plants - 146; Viruses - 0; Other Eukaryotes - 62 (source: NCBI BLink).	PF11976	PTHR10562,PTHR10562:SF15	KOG1769	-	-	-
10	13618946	3.51e-08	Al27	Potri.010G119000	13616687	13617928	+	3'	1018	10_13618946	7.45469	-	Potri.010G119000	-	PTHR31442,PTHR31442:SF9	-	-	-	-	G2-like	AT4G16110	ARR2	response regulator 2	response regulator 2	Encodes a pollen-specific transcription factor involved in the expression of nuclear genes for components of mitochondrial complex I in Arabidopsis. Acts in concert with other type-B ARRs in the cytokinin signaling pathway. AHK3 mediates cytokinin-induced phosphorylation of ARR2 on the Asp-80 residue. This phosphorylation plays a positive role of ARR2 in cytokinin-mediated control of leaf longevi…	response regulator 2 (RR2); CONTAINS InterPro DOMAIN/s: Response regulator, plant B-type (InterPro:IPR017053), Myb-like DNA-binding domain, SHAQKYF class (InterPro:IPR006447), CheY-like (InterPro:IPR011006), Homeodomain-like (InterPro:IPR009057), Myb, DNA-binding (InterPro:IPR014778), Signal transduction response regulator, receiver domain (InterPro:IPR001789), HTH transcriptional regulator, Myb-…	PF00249,PF00072	PTHR26402,PTHR26402:SF617	KOG1601	-	K14491	GO:0000160
10	13618946	3.51e-08	Al27	Potri.010G119100	13620490	13624859	-	5'	1544	10_13618946	7.45469	-	Potri.010G119100	PF00324	PTHR11785,PTHR11785:SF367	-	-	-	GO:0055085,GO:0016020,GO:0006810,GO:0015171,GO:0003333	-	AT2G01170	BAT1	bidirectional amino acid transporter 1	bidirectional amino acid transporter 1	Encodes a bidirectional amino acid transporter that can transport ala, arg, glu and lys, GABA but not pro with both export and import activity. Its expression is localized in the vascular tissues suggesting a function in amino acids export from the phloem into sink tissue.	bidirectional amino acid transporter 1 (BAT1); FUNCTIONS IN: arginine transmembrane transporter activity, L-lysine transmembrane transporter activity, L-alanine transmembrane transporter activity, L-glutamate transmembrane transporter activity; INVOLVED IN: amino acid transport, transport, transmembrane transport; LOCATED IN: integral to membrane, membrane; EXPRESSED IN: 24 plant structures; EXPR…	PF00324	-	-	-	-	GO:0055085,GO:0016020,GO:0006810
6	25342231	3.53e-08	Mo98	Potri.006G245800	25329275	25333698	-	3'	8533	6_25342231	7.45223	-	Potri.006G245800	PF04434	PTHR33977,PTHR33977:SF2	-	-	-	GO:0008270	-	AT1G60560	-	SWIM zinc finger family protein	SWIM zinc finger family protein	-	SWIM zinc finger family protein; FUNCTIONS IN: zinc ion binding; INVOLVED IN: biological_process unknown; LOCATED IN: cellular_component unknown; EXPRESSED IN: 22 plant structures; EXPRESSED DURING: 13 growth stages; CONTAINS InterPro DOMAIN/s: Zinc finger, SWIM-type (InterPro:IPR007527); BEST Arabidopsis thaliana protein match is: zinc ion binding (TAIR:AT4G13970.1); Has 86 Blast hits to 86 prot…	PF04434	PTHR33977,PTHR33977:SF2	-	-	-	GO:0008270
6	25342231	3.53e-08	Mo98	Potri.006G245900	25337833	25339670	-	3'	2561	6_25342231	7.45223	-	Potri.006G245900	PF16983	PTHR31970,PTHR31970:SF3	-	-	-	-	-	AT2G25680	MOT1	molybdate transporter 1	molybdate transporter 1	Encodes a high-affinity molybdate transporter. Mutant has reduced concentrations of molybdate in roots and shoots, and reduced shoot and root length when growing on Mo-limited medium.	molybdate transporter 1 (MOT1); FUNCTIONS IN: molybdate ion transmembrane transporter activity, sulfate transmembrane transporter activity; INVOLVED IN: molybdate ion transport; LOCATED IN: mitochondrion, vacuole; EXPRESSED IN: 13 plant structures; EXPRESSED DURING: LP.04 four leaves visible, 4 anthesis, petal differentiation and expansion stage; BEST Arabidopsis thaliana protein match is: sulfat…	PF16983	PTHR31970,PTHR31970:SF3	-	-	-	-
6	25342231	3.53e-08	Mo98	Potri.006G246000	25345115	25347031	+	5'	2884	6_25342231	7.45223	-	Potri.006G246000	PF16983	PTHR31970,PTHR31970:SF3	-	-	-	-	-	AT2G25680	MOT1	molybdate transporter 1	molybdate transporter 1	Encodes a high-affinity molybdate transporter. Mutant has reduced concentrations of molybdate in roots and shoots, and reduced shoot and root length when growing on Mo-limited medium.	molybdate transporter 1 (MOT1); FUNCTIONS IN: molybdate ion transmembrane transporter activity, sulfate transmembrane transporter activity; INVOLVED IN: molybdate ion transport; LOCATED IN: mitochondrion, vacuole; EXPRESSED IN: 13 plant structures; EXPRESSED DURING: LP.04 four leaves visible, 4 anthesis, petal differentiation and expansion stage; BEST Arabidopsis thaliana protein match is: sulfat…	PF16983	PTHR31970,PTHR31970:SF3	-	-	-	-
6	25342231	3.53e-08	Mo98	Potri.006G246100	25350095	25356024	-	5'	7864	6_25342231	7.45223	-	Potri.006G246100	PF01412	PTHR23180,PTHR23180:SF266	KOG0702	-	-	GO:0005096	-	AT4G32630	-	ArfGap/RecO-like zinc finger domain-containing protein	ArfGap/RecO-like zinc finger domain-containing protein	-	ArfGap/RecO-like zinc finger domain-containing protein; FUNCTIONS IN: ARF GTPase activator activity, zinc ion binding; INVOLVED IN: regulation of ARF GTPase activity; LOCATED IN: cellular_component unknown; EXPRESSED IN: 18 plant structures; EXPRESSED DURING: 10 growth stages; CONTAINS InterPro DOMAIN/s: Arf GTPase activating protein (InterPro:IPR001164); BEST Arabidopsis thaliana protein match i…	PF01412	PTHR23180,PTHR23180:SF266	-	-	-	GO:0005096
16	4148755	3.55e-08	Al27	Potri.016G060000	4137922	4141631	-	3'	7124	16_4148755	7.44977	-	Potri.016G060000	PF02245	PTHR10429,PTHR10429:SF0	KOG4486	3.2.2.21	K03652	GO:0006284,GO:0003905,GO:0003677	-	AT3G12040	-	DNA-3-methyladenine glycosylase (MAG)	DNA-3-methyladenine glycosylase (MAG)	-	DNA-3-methyladenine glycosylase (MAG); FUNCTIONS IN: DNA binding, alkylbase DNA N-glycosylase activity, catalytic activity; INVOLVED IN: base-excision repair; LOCATED IN: cellular_component unknown; EXPRESSED IN: 22 plant structures; EXPRESSED DURING: 14 growth stages; CONTAINS InterPro DOMAIN/s: Methylpurine-DNA glycosylase (MPG) (InterPro:IPR003180), Formyl transferase, C-terminal-like (InterPr…	PF02245	PTHR10429,PTHR10429:SF0	KOG4486	3.2.2.21	K03652	GO:0006284,GO:0003905,GO:0003677
16	4148755	3.55e-08	Al27	Potri.016G060100	4143813	4145876	+	3'	2879	16_4148755	7.44977	-	Potri.016G060100	PF08327,PF09229	PTHR13009,PTHR13009:SF8	KOG2936	-	-	GO:0006950,GO:0051087,GO:0001671	-	AT3G12050	-	Aha1 domain-containing protein	Aha1 domain-containing protein	-	Aha1 domain-containing protein; FUNCTIONS IN: ATPase activator activity, chaperone binding; INVOLVED IN: response to stress; LOCATED IN: cytoplasm; EXPRESSED IN: 24 plant structures; EXPRESSED DURING: 16 growth stages; CONTAINS InterPro DOMAIN/s: Activator of Hsp90 ATPase, N-terminal (InterPro:IPR015310), Activator of Hsp90 ATPase homologue 1-like (InterPro:IPR013538); Has 600 Blast hits to 579 p…	PF08327,PF09229	PTHR13009,PTHR13009:SF8	KOG2936	-	-	GO:0006950,GO:0051087,GO:0001671
18	14277823	3.58e-08	Cu65	Potri.018G118400	14268765	14268965	-	3'	8858	18_14277823	7.44612	-	Potri.018G118400	-	-	-	-	-	-	-	AT1G15740	-	Leucine-rich repeat family protein	Leucine-rich repeat family protein	-	Leucine-rich repeat family protein; BEST Arabidopsis thaliana protein match is: Leucine-rich repeat (LRR) family protein (TAIR:AT4G23840.1); Has 38052 Blast hits to 19856 proteins in 856 species: Archae - 6; Bacteria - 8624; Metazoa - 11681; Fungi - 680; Plants - 12072; Viruses - 79; Other Eukaryotes - 4910 (source: NCBI BLink).	PF13855	PTHR24006,PTHR24006:SF451	-	-	-	GO:0005515
18	14277823	3.58e-08	Cu65	Potri.018G118500	14275754	14277330	-	3'	493	18_14277823	7.44612	-	Potri.018G118500	PF12796	PTHR24161,PTHR24161:SF22	KOG4214	2.3.1.225	-	-	-	AT5G20350	TIP1	Ankyrin repeat family protein with DHHC zinc finger domain	Ankyrin repeat family protein with DHHC zinc finger domain	Encodes a protein containing ankyrin and DHHC-CRD domain. Acts to restrict the size of the swelling that forms at the beginning of root hair cell growth, possibly by a mechanism that requires RHD1. Mutant displays defects in both root hair and pollen tube growth.	TIP GROWTH DEFECTIVE 1 (TIP1); FUNCTIONS IN: acyl binding, S-acyltransferase activity; INVOLVED IN: response to salt stress, cell tip growth; EXPRESSED IN: 28 plant structures; EXPRESSED DURING: 15 growth stages; CONTAINS InterPro DOMAIN/s: Zinc finger, DHHC-type (InterPro:IPR001594), Ankyrin repeat-containing domain (InterPro:IPR020683), Ankyrin repeat (InterPro:IPR002110); BEST Arabidopsis thal…	PF12796,PF01529	PTHR24161,PTHR24161:SF22	-	2.3.1.225	K18932	GO:0008270
18	14277823	3.58e-08	Cu65	Potri.018G118600	14287532	14288134	+	5'	9709	18_14277823	7.44612	-	Potri.018G118600	PF03171	PTHR10209,PTHR10209:SF107	-	1.14.11.32	-	GO:0055114,GO:0016491	-	AT1G49390	-	2-oxoglutarate (2OG) and Fe(II)-dependent oxygenase superfamily protein	2-oxoglutarate (2OG) and Fe(II)-dependent oxygenase superfamily protein	-	2-oxoglutarate (2OG) and Fe(II)-dependent oxygenase superfamily protein; FUNCTIONS IN: oxidoreductase activity, acting on paired donors, with incorporation or reduction of molecular oxygen, 2-oxoglutarate as one donor, and incorporation of one atom each of oxygen into both donors, oxidoreductase activity; INVOLVED IN: flavonoid biosynthetic process; LOCATED IN: cellular_component unknown; EXPRESS…	PF03171,PF14226	PTHR10209,PTHR10209:SF107	KOG0143	1.14.11.32	-	GO:0055114,GO:0016491
30	295335	3.62e-08	Al27	Potri.T026800	292425	295283	+	3'	52	30_295335	7.44129	-	Potri.T026800	PF13855,PF00931	PTHR23155,PTHR23155:SF497	KOG4658	-	K13459	GO:0005515,GO:0043531	-	AT4G10780	-	LRR and NB-ARC domains-containing disease resistance protein	LRR and NB-ARC domains-containing disease resistance protein	-	LRR and NB-ARC domains-containing disease resistance protein; FUNCTIONS IN: nucleoside-triphosphatase activity, nucleotide binding, ATP binding; INVOLVED IN: N-terminal protein myristoylation, defense response, apoptosis; CONTAINS InterPro DOMAIN/s: ATPase, AAA+ type, core (InterPro:IPR003593), NB-ARC (InterPro:IPR002182), Disease resistance protein (InterPro:IPR000767); BEST Arabidopsis thaliana…	PF13855,PF00931	PTHR23155,PTHR23155:SF639	-	-	-	GO:0005515,GO:0043531
30	295335	3.62e-08	Al27	Potri.T026900	300155	304905	+	5'	4820	30_295335	7.44129	-	Potri.T026900	PF13855,PF00931	PTHR23155,PTHR23155:SF497	KOG4658	-	-	GO:0005515,GO:0043531	-	AT4G27220	-	NB-ARC domain-containing disease resistance protein	NB-ARC domain-containing disease resistance protein	-	NB-ARC domain-containing disease resistance protein; FUNCTIONS IN: ATP binding; INVOLVED IN: defense response, apoptosis; CONTAINS InterPro DOMAIN/s: NB-ARC (InterPro:IPR002182), Leucine-rich repeat (InterPro:IPR001611), Disease resistance protein (InterPro:IPR000767); BEST Arabidopsis thaliana protein match is: NB-ARC domain-containing disease resistance protein (TAIR:AT4G27190.1); Has 1807 Blas…	PF13855,PF00931	PTHR23155,PTHR23155:SF449	-	-	-	GO:0005515,GO:0043531
30	295335	3.62e-08	Al27	Potri.T027000	305197	305609	+	5'	9862	30_295335	7.44129	-	Potri.T027000	-	PTHR23155,PTHR23155:SF497	-	-	-	-	-	AT1G12290	-	Disease resistance protein (CC-NBS-LRR class) family	Disease resistance protein (CC-NBS-LRR class) family	-	Disease resistance protein (CC-NBS-LRR class) family; FUNCTIONS IN: ATP binding; INVOLVED IN: N-terminal protein myristoylation, defense response; EXPRESSED IN: stem, inflorescence meristem, root, stamen; EXPRESSED DURING: 4 anthesis; CONTAINS InterPro DOMAIN/s: NB-ARC (InterPro:IPR002182), Disease resistance protein (InterPro:IPR000767); BEST Arabidopsis thaliana protein match is: Disease resist…	PF13855,PF00931	PTHR23155,PTHR23155:SF639	-	-	-	GO:0005515,GO:0043531
4	17404810	3.94e-08	Cu65	Potri.004G152000	17394422	17397013	-	3'	7797	4_17404810	7.4045	-	Potri.004G152000	PF13041,PF01535	PTHR24015,PTHR24015:SF714	-	-	-	-	-	AT3G18840	-	Tetratricopeptide repeat (TPR)-like superfamily protein	Tetratricopeptide repeat (TPR)-like superfamily protein	-	Tetratricopeptide repeat (TPR)-like superfamily protein; CONTAINS InterPro DOMAIN/s: Pentatricopeptide repeat (InterPro:IPR002885); BEST Arabidopsis thaliana protein match is: Pentatricopeptide repeat (PPR) superfamily protein (TAIR:AT2G13600.1); Has 42936 Blast hits to 13106 proteins in 190 species: Archae - 0; Bacteria - 3; Metazoa - 51; Fungi - 30; Plants - 42456; Viruses - 0; Other Eukaryotes…	PF13041,PF01535	PTHR24015,PTHR24015:SF714	-	-	-	-
4	17404810	3.94e-08	Cu65	Potri.004G152100	17397729	17401939	-	3'	2871	4_17404810	7.4045	-	Potri.004G152100	PF00294	PTHR10584,PTHR10584:SF188	KOG2855	-	-	-	-	AT1G49350	-	pfkB-like carbohydrate kinase family protein	pfkB-like carbohydrate kinase family protein	-	pfkB-like carbohydrate kinase family protein; FUNCTIONS IN: kinase activity, ribokinase activity; INVOLVED IN: D-ribose metabolic process; LOCATED IN: cellular_component unknown; EXPRESSED IN: 22 plant structures; EXPRESSED DURING: 13 growth stages; CONTAINS InterPro DOMAIN/s: Carbohydrate/purine kinase (InterPro:IPR011611), Ribokinase (InterPro:IPR002139), Carbohydrate/puine kinase, PfkB, conser…	PF00294	PTHR10584,PTHR10584:SF188	KOG2855	2.7.1.83	-	-
4	17404810	3.94e-08	Cu65	Potri.004G152200	17408424	17408594	+	5'	3614	4_17404810	7.4045	-
8	5242759	4.03e-08	Al27	Potri.008G083200	5233370	5243379	+	in gene	0	8_5242759	7.39469	-	Potri.008G083200	PF02984,PF00134	PTHR10177,PTHR10177:SF222	KOG0653	-	-	GO:0005634	-	AT1G16330	CYCB3;1	cyclin b3;1	cyclin b3;1	core cell cycle genes	cyclin b3;1 (CYCB3;1); FUNCTIONS IN: cyclin-dependent protein kinase activity; INVOLVED IN: regulation of cell cycle; LOCATED IN: nucleus; EXPRESSED IN: 17 plant structures; EXPRESSED DURING: 10 growth stages; CONTAINS InterPro DOMAIN/s: Cyclin, C-terminal (InterPro:IPR004367), Cyclin-like (InterPro:IPR011028), Cyclin-related (InterPro:IPR013763), Cyclin, N-terminal (InterPro:IPR006671), Cyclin (…	PF02984,PF00134	PTHR10177,PTHR10177:SF222	KOG0653	-	K05868	GO:0005634
8	5242759	4.03e-08	Al27	Potri.008G083300	5244919	5250465	-	5'	2160	8_5242759	7.39469	-	Potri.008G083300	-	PTHR35118,PTHR35118:SF2	-	6.3.2.19	-	-	-	AT2G40980	-	Protein kinase superfamily protein	Protein kinase superfamily protein	-	Protein kinase superfamily protein; LOCATED IN: plasma membrane; EXPRESSED IN: 22 plant structures; EXPRESSED DURING: 13 growth stages; CONTAINS InterPro DOMAIN/s: Protein kinase-like domain (InterPro:IPR011009); Has 288 Blast hits to 258 proteins in 97 species: Archae - 0; Bacteria - 150; Metazoa - 0; Fungi - 0; Plants - 117; Viruses - 0; Other Eukaryotes - 21 (source: NCBI BLink).	-	PTHR35118,PTHR35118:SF2	KOG1164	2.7.11.17	-	-
6	25344799	4.08e-08	Mo98	Potri.006G245900	25337833	25339670	-	3'	5129	6_25344799	7.38934	-	Potri.006G245900	PF16983	PTHR31970,PTHR31970:SF3	-	-	-	-	-	AT2G25680	MOT1	molybdate transporter 1	molybdate transporter 1	Encodes a high-affinity molybdate transporter. Mutant has reduced concentrations of molybdate in roots and shoots, and reduced shoot and root length when growing on Mo-limited medium.	molybdate transporter 1 (MOT1); FUNCTIONS IN: molybdate ion transmembrane transporter activity, sulfate transmembrane transporter activity; INVOLVED IN: molybdate ion transport; LOCATED IN: mitochondrion, vacuole; EXPRESSED IN: 13 plant structures; EXPRESSED DURING: LP.04 four leaves visible, 4 anthesis, petal differentiation and expansion stage; BEST Arabidopsis thaliana protein match is: sulfat…	PF16983	PTHR31970,PTHR31970:SF3	-	-	-	-
6	25344799	4.08e-08	Mo98	Potri.006G246000	25345115	25347031	+	5'	316	6_25344799	7.38934	-	Potri.006G246000	PF16983	PTHR31970,PTHR31970:SF3	-	-	-	-	-	AT2G25680	MOT1	molybdate transporter 1	molybdate transporter 1	Encodes a high-affinity molybdate transporter. Mutant has reduced concentrations of molybdate in roots and shoots, and reduced shoot and root length when growing on Mo-limited medium.	molybdate transporter 1 (MOT1); FUNCTIONS IN: molybdate ion transmembrane transporter activity, sulfate transmembrane transporter activity; INVOLVED IN: molybdate ion transport; LOCATED IN: mitochondrion, vacuole; EXPRESSED IN: 13 plant structures; EXPRESSED DURING: LP.04 four leaves visible, 4 anthesis, petal differentiation and expansion stage; BEST Arabidopsis thaliana protein match is: sulfat…	PF16983	PTHR31970,PTHR31970:SF3	-	-	-	-
6	25344799	4.08e-08	Mo98	Potri.006G246100	25350095	25356024	-	5'	5296	6_25344799	7.38934	-	Potri.006G246100	PF01412	PTHR23180,PTHR23180:SF266	KOG0702	-	-	GO:0005096	-	AT4G32630	-	ArfGap/RecO-like zinc finger domain-containing protein	ArfGap/RecO-like zinc finger domain-containing protein	-	ArfGap/RecO-like zinc finger domain-containing protein; FUNCTIONS IN: ARF GTPase activator activity, zinc ion binding; INVOLVED IN: regulation of ARF GTPase activity; LOCATED IN: cellular_component unknown; EXPRESSED IN: 18 plant structures; EXPRESSED DURING: 10 growth stages; CONTAINS InterPro DOMAIN/s: Arf GTPase activating protein (InterPro:IPR001164); BEST Arabidopsis thaliana protein match i…	PF01412	PTHR23180,PTHR23180:SF266	-	-	-	GO:0005096
9	2654517	4.11e-08	Na23	Potri.009G015800	2662464	2669160	+	5'	7947	9_2654517	7.38616	-	Potri.009G015800	PF00612	PTHR32295,PTHR32295:SF12	-	-	-	GO:0005515	-	AT3G22190	IQD5	IQ-domain 5	IQ-domain 5	-	IQ-domain 5 (IQD5); FUNCTIONS IN: calmodulin binding; INVOLVED IN: biological_process unknown; LOCATED IN: plasma membrane; EXPRESSED IN: 24 plant structures; EXPRESSED DURING: 13 growth stages; CONTAINS InterPro DOMAIN/s: IQ calmodulin-binding region (InterPro:IPR000048); BEST Arabidopsis thaliana protein match is: IQ-domain 6 (TAIR:AT2G26180.1); Has 890 Blast hits to 885 proteins in 49 species:…	PF00612	PTHR32295,PTHR32295:SF12	-	-	-	GO:0005515
7	4530718	4.11e-08	Al27	Potri.007G048500	4535494	4538823	-	5'	4776	7_4530718	7.38616	-	Potri.007G048500	PF16900,PF05970	PTHR10492	-	-	K07466	GO:0006281,GO:0003678,GO:0000723	-	AT5G28780	-	PIF1 helicase	PIF1 helicase	-	PIF1 helicase; CONTAINS InterPro DOMAIN/s: DNA helicase PIF1, ATP-dependent (InterPro:IPR010285); BEST Arabidopsis thaliana protein match is: PIF1 helicase (TAIR:AT3G51690.1); Has 1364 Blast hits to 1355 proteins in 303 species: Archae - 2; Bacteria - 367; Metazoa - 234; Fungi - 111; Plants - 389; Viruses - 9; Other Eukaryotes - 252 (source: NCBI BLink).	PF05970	PTHR10492	-	3.6.4.12	K15255	GO:0006281,GO:0003678,GO:0000723
752	8327	4.19e-08	Al27	Potri.T161400	3	772	-	3'	7555	752_8327	7.37779	-	Potri.T161400	PF08038	PTHR34944,PTHR34944:SF2	KOG4449	-	K17771	GO:0030150,GO:0005742	-	AT5G41685	-	Mitochondrial outer membrane translocase complex, subunit Tom7	Mitochondrial outer membrane translocase complex, subunit Tom7	-	Mitochondrial outer membrane translocase complex, subunit Tom7; FUNCTIONS IN: protein transporter activity, P-P-bond-hydrolysis-driven protein transmembrane transporter activity; INVOLVED IN: intracellular protein transport; LOCATED IN: mitochondrial outer membrane; EXPRESSED IN: 23 plant structures; EXPRESSED DURING: 13 growth stages; CONTAINS InterPro DOMAIN/s: Mitochondrial outer membrane tran…	PF08038	PTHR34944	KOG4449	-	K17771	GO:0030150,GO:0005742
752	8327	4.19e-08	Al27	Potri.T161500	2572	3508	-	3'	4819	752_8327	7.37779	-	Potri.T161500	PF00298,PF03946	PTHR11661,PTHR11661:SF6	KOG0886	-	K02870	GO:0006412,GO:0005840,GO:0003735	-	AT3G53430	-	Ribosomal protein L11 family protein	Ribosomal protein L11 family protein	-	Ribosomal protein L11 family protein; FUNCTIONS IN: structural constituent of ribosome; INVOLVED IN: translation, ribosome biogenesis; LOCATED IN: ribosome, cytosolic large ribosomal subunit, membrane; EXPRESSED IN: 23 plant structures; EXPRESSED DURING: 13 growth stages; CONTAINS InterPro DOMAIN/s: Ribosomal protein L11, C-terminal domain (InterPro:IPR020783), Ribosomal protein L11, N-terminal d…	PF00298,PF03946	PTHR11661,PTHR11661:SF6	KOG0886	-	K02870	GO:0006412,GO:0005840,GO:0003735
752	8327	4.19e-08	Al27	Potri.T161600	5008	7703	+	3'	624	752_8327	7.37779	-	Potri.T161600	-	PTHR12289,PTHR12289:SF38	KOG3028	-	-	-	-	AT2G19080	-	metaxin-related	metaxin-related	-	metaxin-related; FUNCTIONS IN: molecular_function unknown; INVOLVED IN: protein targeting to mitochondrion; LOCATED IN: mitochondrial outer membrane, mitochondrion, mitochondrial inner membrane, plastid; EXPRESSED IN: 24 plant structures; EXPRESSED DURING: 13 growth stages; CONTAINS InterPro DOMAIN/s: Outer mitochondrial membrane transport complex protein, Metaxin (InterPro:IPR017410); Has 480 Bl…	PF14497	PTHR12289,PTHR12289:SF38	KOG3028	-	K17776	-
752	8327	4.19e-08	Al27	Potri.T161700	8220	10606	+	in gene	0	752_8327	7.37779	-
752	8327	4.19e-08	Al27	Potri.T161800	11895	16396	-	5'	3568	752_8327	7.37779	-	Potri.T161800	PF08263,PF13855	PTHR27004,PTHR27004:SF11	KOG0472	2.7.11.1	-	GO:0005515	-	AT1G58190	AtRLP9	receptor like protein 9	receptor like protein 9	-	receptor like protein 9 (RLP9); INVOLVED IN: signal transduction; LOCATED IN: endomembrane system; CONTAINS InterPro DOMAIN/s: Leucine-rich repeat, typical subtype (InterPro:IPR003591), Leucine-rich repeat-containing N-terminal domain, type 2 (InterPro:IPR013210), Leucine-rich repeat (InterPro:IPR001611); BEST Arabidopsis thaliana protein match is: receptor like protein 13 (TAIR:AT1G74170.1).	PF08263,PF13855	PTHR27004,PTHR27004:SF29	KOG0472	2.7.11.1	-	GO:0005515
16	14007692	4.56e-08	Mo98	Potri.016G137200	13998474	14002704	+	3'	4988	16_14007692	7.34104	-	Potri.016G137200	PF03647	PTHR12668,PTHR12668:SF19	KOG4267	-	-	GO:0016020	-	AT2G38550	-	Transmembrane proteins 14C	Transmembrane proteins 14C	-	Transmembrane proteins 14C; INVOLVED IN: biological_process unknown; LOCATED IN: mitochondrion, chloroplast, plastid, chloroplast inner membrane, chloroplast envelope; EXPRESSED IN: 23 plant structures; EXPRESSED DURING: 13 growth stages; CONTAINS InterPro DOMAIN/s: Uncharacterised protein family UPF0136, Transmembrane (InterPro:IPR005349); BEST Arabidopsis thaliana protein match is: Transmembran…	PF03647	PTHR12668,PTHR12668:SF19	KOG4267	-	-	GO:0016020
16	14007692	4.56e-08	Mo98	Potri.016G137300	14002260	14008596	-	in gene	0	16_14007692	7.34104	-	Potri.016G137300	PF02225	PTHR22765,PTHR22765:SF58	-	-	-	-	-	AT3G52850	ATELP	vacuolar sorting receptor homolog 1	vacuolar sorting receptor homolog 1	Encodes the Vacuolar Sorting Receptor-1 (VSR-1)/Epidermal Growth Factor Receptor-like protein1(VSR-1/ATELP1). Binds vacuolar targeting signals. Involved in sorting seed storage proteins into vacuoles.	vacuolar sorting receptor homolog 1 (VSR1); FUNCTIONS IN: amino-terminal vacuolar sorting propeptide binding; INVOLVED IN: Golgi to vacuole transport, vacuolar transport, protein targeting to vacuole; LOCATED IN: trans-Golgi network, Golgi apparatus, plasma membrane, integral to plasma membrane, Golgi transport complex; EXPRESSED IN: 24 plant structures; EXPRESSED DURING: 13 growth stages; CONTAI…	PF02225	PTHR22765,PTHR22765:SF58	-	-	-	-
16	14007692	4.56e-08	Mo98	Potri.016G137400	14015822	14017597	+	5'	8130	16_14007692	7.34104	-	Potri.016G137400	PF00067	PTHR24298,PTHR24298:SF86	KOG0156	1.14.13.120	-	GO:0055114,GO:0020037,GO:0016705,GO:0005506	-	AT3G26320	CYP71B36	cytochrome P450, family 71, subfamily B, polypeptide 36	cytochrome P450, family 71, subfamily B, polypeptide 36	putative cytochrome P450	cytochrome P450, family 71, subfamily B, polypeptide 36 (CYP71B36); FUNCTIONS IN: electron carrier activity, monooxygenase activity, iron ion binding, oxygen binding, heme binding; INVOLVED IN: oxidation reduction; LOCATED IN: cellular_component unknown; EXPRESSED IN: 8 plant structures; EXPRESSED DURING: LP.06 six leaves visible, LP.04 four leaves visible, LP.10 ten leaves visible, LP.02 two lea…	PF00067	PTHR24298,PTHR24298:SF85	-	1.14.13.68	K00517	GO:0055114,GO:0020037,GO:0016705,GO:0005506
5	24584393	4.73e-08	Cu65	Potri.005G239200	24584552	24588103	-	5'	159	5_24584393	7.32514	-	Potri.005G239200	PF00504	PTHR21649,PTHR21649:SF26	-	-	K08912	GO:0016020,GO:0009765	-	AT2G34430	LHB1B1	light-harvesting chlorophyll-protein complex II subunit B1	light-harvesting chlorophyll-protein complex II subunit B1	Photosystem II type I chlorophyll a/b-binding protein	light-harvesting chlorophyll-protein complex II subunit B1 (LHB1B1); FUNCTIONS IN: chlorophyll binding; INVOLVED IN: photosynthesis, light harvesting in photosystem II, photosynthesis; LOCATED IN: in 8 components; EXPRESSED IN: shoot, cotyledon, guard cell, cultured cell, leaf; CONTAINS InterPro DOMAIN/s: Chlorophyll A-B binding protein (InterPro:IPR001344); BEST Arabidopsis thaliana protein matc…	PF00504	PTHR21649,PTHR21649:SF26	-	-	K08912	GO:0016020,GO:0009765
5	24584393	4.73e-08	Cu65	Potri.005G239300	24586795	24588103	+	5'	2402	5_24584393	7.32514	-	Potri.005G239300	PF00504	PTHR21649,PTHR21649:SF26	-	-	K08912	GO:0016020,GO:0009765	-	AT2G34430	LHB1B1	light-harvesting chlorophyll-protein complex II subunit B1	light-harvesting chlorophyll-protein complex II subunit B1	Photosystem II type I chlorophyll a/b-binding protein	light-harvesting chlorophyll-protein complex II subunit B1 (LHB1B1); FUNCTIONS IN: chlorophyll binding; INVOLVED IN: photosynthesis, light harvesting in photosystem II, photosynthesis; LOCATED IN: in 8 components; EXPRESSED IN: shoot, cotyledon, guard cell, cultured cell, leaf; CONTAINS InterPro DOMAIN/s: Chlorophyll A-B binding protein (InterPro:IPR001344); BEST Arabidopsis thaliana protein matc…	PF00504	PTHR21649,PTHR21649:SF26	-	-	K08912	GO:0016020,GO:0009765
5	24584393	4.73e-08	Cu65	Potri.005G239400	24589827	24592330	-	5'	5434	5_24584393	7.32514	-	Potri.005G239400	PF12899	PTHR31916,PTHR31916:SF13	-	3.2.1.26	-	GO:0033926	-	AT4G34860	-	Plant neutral invertase family protein	Plant neutral invertase family protein	-	Plant neutral invertase family protein; FUNCTIONS IN: catalytic activity, beta-fructofuranosidase activity; INVOLVED IN: sucrose catabolic process, using beta-fructofuranosidase; LOCATED IN: cytosol; EXPRESSED IN: 20 plant structures; EXPRESSED DURING: 11 growth stages; CONTAINS InterPro DOMAIN/s: Plant neutral invertase (InterPro:IPR006937), Six-hairpin glycosidase-like (InterPro:IPR008928); BES…	PF12899	PTHR31916,PTHR31916:SF15	-	3.2.1.26	-	GO:0033926
5	24584393	4.73e-08	Cu65	Potri.005G239500	24593517	24596420	+	5'	9124	5_24584393	7.32514	-	Potri.005G239500	-	PTHR35992	-	-	-	-	-	AT1G19980	-	cytomatrix protein-related	cytomatrix protein-related	-	cytomatrix protein-related; Has 8598 Blast hits to 6353 proteins in 629 species: Archae - 108; Bacteria - 984; Metazoa - 3794; Fungi - 795; Plants - 240; Viruses - 29; Other Eukaryotes - 2648 (source: NCBI BLink).	-	PTHR35992	-	-	-	-
5	16408880	4.75e-08	Na23	Potri.005G161000	16401192	16403267	+	3'	5613	5_16408880	7.32331	-	Potri.005G161000	PF00076	PTHR24012,PTHR24012:SF477	KOG0106,KOG0105,KOG0131,KOG0144	-	-	GO:0003676	-	AT4G09040	-	RNA-binding (RRM/RBD/RNP motifs) family protein	RNA-binding (RRM/RBD/RNP motifs) family protein	-	RNA-binding (RRM/RBD/RNP motifs) family protein; FUNCTIONS IN: RNA binding, nucleotide binding, nucleic acid binding; INVOLVED IN: biological_process unknown; LOCATED IN: chloroplast stroma, chloroplast; EXPRESSED IN: leaf; CONTAINS InterPro DOMAIN/s: RNA recognition motif, RNP-1 (InterPro:IPR000504), Nucleotide-binding, alpha-beta plait (InterPro:IPR012677); BEST Arabidopsis thaliana protein mat…	PF14259,PF00076	PTHR24012,PTHR24012:SF477	KOG0131	-	-	GO:0003676
13	2992693	4.87e-08	Al27	Potri.013G042500	2982304	2984904	+	3'	7789	13_2992693	7.31247	-	Potri.013G042500	PF11721,PF07714	PTHR27003,PTHR27003:SF110	KOG1187	2.7.11.1	-	GO:0006468,GO:0004672	-	AT3G04690	ANX1	Malectin/receptor-like protein kinase family protein	Malectin/receptor-like protein kinase family protein	Receptor-like kinase required for maintenance of pollen tube growth. Display polar localization at the plasma membrane of the pollen tube tip.	ANXUR1 (ANX1); FUNCTIONS IN: protein serine/threonine kinase activity, protein kinase activity, kinase activity, ATP binding; INVOLVED IN: pollen tube growth; LOCATED IN: apical plasma membrane; EXPRESSED IN: 8 plant structures; EXPRESSED DURING: L mature pollen stage, M germinated pollen stage, 4 anthesis, petal differentiation and expansion stage; CONTAINS InterPro DOMAIN/s: Protein kinase, ATP…	PF11721,PF07714	PTHR27003,PTHR27003:SF7	KOG1187	2.7.11.1	-	GO:0006468,GO:0004672
13	2992693	4.87e-08	Al27	Potri.013G042600	2993743	2996226	+	5'	1050	13_2992693	7.31247	-	Potri.013G042600	PF10533,PF03106	PTHR31282,PTHR31282:SF12	-	-	-	GO:0043565,GO:0006355,GO:0003700	WRKY	AT3G04670	ATWRKY39	WRKY DNA-binding protein 39	WRKY DNA-binding protein 39	member of WRKY Transcription Factor; Group II-d	WRKY DNA-binding protein 39 (WRKY39); FUNCTIONS IN: calmodulin binding, sequence-specific DNA binding transcription factor activity; INVOLVED IN: regulation of transcription, DNA-dependent, regulation of transcription; LOCATED IN: nucleus; EXPRESSED IN: 22 plant structures; EXPRESSED DURING: 13 growth stages; CONTAINS InterPro DOMAIN/s: DNA-binding WRKY (InterPro:IPR003657), Transcription factor,…	PF10533,PF03106	PTHR31282,PTHR31282:SF12	-	-	-	GO:0043565,GO:0006355,GO:0003700
13	2992693	4.87e-08	Al27	Potri.013G042700	3002202	3003234	+	5'	9509	13_2992693	7.31247	-	Potri.013G042700	PF00538	PTHR11467,PTHR11467:SF48	-	-	K11275	GO:0006334,GO:0005634,GO:0003677,GO:0000786	-	AT2G30620	-	winged-helix DNA-binding transcription factor family protein	winged-helix DNA-binding transcription factor family protein	-	winged-helix DNA-binding transcription factor family protein; FUNCTIONS IN: DNA binding; INVOLVED IN: nucleosome assembly; LOCATED IN: nucleolus, nucleus, nucleosome; EXPRESSED IN: 23 plant structures; EXPRESSED DURING: 13 growth stages; CONTAINS InterPro DOMAIN/s: Winged helix-turn-helix transcription repressor DNA-binding (InterPro:IPR011991), Histone H5 (InterPro:IPR005819), Histone H1/H5 (Int…	PF00538	PTHR11467,PTHR11467:SF48	KOG4012	-	K11275	GO:0006334,GO:0005634,GO:0003677,GO:0000786
2	953171	4.9e-08	Al27	Potri.002G016300	952989	955169	+	in gene	0	2_953171	7.3098	-	Potri.002G016300	PF08241,PF08498	PTHR10108,PTHR10108:SF858	KOG1269	2.1.1.143,2.1.1.142	K08242	GO:0008168,GO:0008152,GO:0006694	-	AT1G20330	CVP1	sterol methyltransferase 2	sterol methyltransferase 2	Encodes a sterol-C24-methyltransferases involved in sterol biosynthesis. Mutants display altered sterol composition, serrated petals and sepals and altered cotyledon vascular patterning as well as ectopic endoreduplication. This suggests that suppression of endoreduplication is important for petal morphogenesis and that normal sterol composition is required for this suppression.	sterol methyltransferase 2 (SMT2); FUNCTIONS IN: S-adenosylmethionine-dependent methyltransferase activity; INVOLVED IN: xylem and phloem pattern formation, negative regulation of DNA endoreduplication, multidimensional cell growth, sterol biosynthetic process, pattern specification process; LOCATED IN: endoplasmic reticulum; EXPRESSED IN: 30 plant structures; EXPRESSED DURING: 14 growth stages; …	PF08241,PF08498	PTHR10108,PTHR10108:SF858	KOG1269	2.1.1.143,2.1.1.142	K08242	GO:0008168,GO:0008152,GO:0006694
2	953171	4.9e-08	Al27	Potri.002G016400	957319	958407	+	5'	4148	2_953171	7.3098	-	Potri.002G016400	PF00085	PTHR10438,PTHR10438:SF247	KOG0907	3.5.1.52	-	GO:0045454,GO:0015035,GO:0006662	-	AT1G76080	ATCDSP32	chloroplastic drought-induced stress protein of 32 kD	chloroplastic drought-induced stress protein of 32 kD	Encodes a thioredoxin localized in chloroplast stroma. Known as CDSP32 (CHLOROPLASTIC DROUGHT-INDUCED STRESS PROTEIN OF 32 KD).	chloroplastic drought-induced stress protein of 32 kD (CDSP32); INVOLVED IN: cell redox homeostasis; LOCATED IN: chloroplast stroma, chloroplast, chloroplast envelope; EXPRESSED IN: 23 plant structures; EXPRESSED DURING: 14 growth stages; CONTAINS InterPro DOMAIN/s: Thioredoxin fold (InterPro:IPR012335), Thioredoxin, core (InterPro:IPR015467), Thioredoxin domain (InterPro:IPR013766), Thioredoxin-…	PF00085	PTHR10438,PTHR10438:SF247	KOG0907	1.6.5.4	-	GO:0045454,GO:0015035,GO:0006662
2	953171	4.9e-08	Al27	Potri.002G016500	961589	962848	-	5'	8418	2_953171	7.3098	-	Potri.002G016500	-	PTHR34779	-	-	-	-	-	AT1G76070	-	-	-	-	unknown protein; FUNCTIONS IN: molecular_function unknown; INVOLVED IN: biological_process unknown; LOCATED IN: plasma membrane; EXPRESSED IN: 8 plant structures; EXPRESSED DURING: LP.04 four leaves visible, 4 anthesis, petal differentiation and expansion stage; BEST Arabidopsis thaliana protein match is: unknown protein (TAIR:AT1G20310.1); Has 66 Blast hits to 66 proteins in 15 species: Archae -…	-	PTHR34779	-	-	-	-
9	6323870	4.93e-08	Mg25	Potri.009G061100	6310104	6314535	-	3'	9335	9_6323870	7.30715	-	Potri.009G061100	PF01554	PTHR11206,PTHR11206:SF156	KOG1347	-	-	GO:0055085,GO:0016020,GO:0015297,GO:0015238,GO:0006855	-	AT3G08040	ATFRD3	MATE efflux family protein	MATE efflux family protein	Encodes a member of the MATE (multidrug and toxin efflux family), expressed in roots but not shoots. Mutants accumulate excess iron, manganese and zinc, and express root Fe(III) chelatase activity even under iron sufficiency conditions. FRD3 is likely to function in root xylem loading of an iron chelator or other factor necessary for efficient iron uptake out of the xylem or apoplastic space and …	FERRIC REDUCTASE DEFECTIVE 3 (FRD3); FUNCTIONS IN: antiporter activity, transporter activity; INVOLVED IN: cellular iron ion homeostasis; LOCATED IN: plasma membrane, membrane; EXPRESSED IN: 20 plant structures; EXPRESSED DURING: 4 anthesis, F mature embryo stage, petal differentiation and expansion stage, D bilateral stage; CONTAINS InterPro DOMAIN/s: Multi antimicrobial extrusion protein MatE (…	PF01554	PTHR11206,PTHR11206:SF156	KOG1347	-	-	GO:0055085,GO:0016020,GO:0015297,GO:0015238,GO:0006855
9	6323870	4.93e-08	Mg25	Potri.009G061200	6318284	6319678	+	3'	4192	9_6323870	7.30715	-	Potri.009G061200	-	-	-	-	-	-	-	-	-	-	-	-	-	-	-	-	-	-	-
9	6323870	4.93e-08	Mg25	Potri.009G061300	6331884	6334069	-	5'	8014	9_6323870	7.30715	-	Potri.009G061300	-	PTHR31852,PTHR31852:SF46	-	-	-	-	-	AT3G08490	-	-	-	-	BEST Arabidopsis thaliana protein match is: Late embryogenesis abundant protein, group 2 (TAIR:AT3G24600.1); Has 161 Blast hits to 158 proteins in 15 species: Archae - 0; Bacteria - 0; Metazoa - 0; Fungi - 0; Plants - 161; Viruses - 0; Other Eukaryotes - 0 (source: NCBI BLink).	-	PTHR31852,PTHR31852:SF46	-	-	-	-
19	3358978	5.02e-08	Cu65	Potri.019G029800	3345964	3349933	+	3'	9045	19_3358978	7.2993	-	Potri.019G029800	-	PTHR35481,PTHR35481:SF1	-	-	-	-	-	AT2G38430	-	-	-	-	unknown protein; BEST Arabidopsis thaliana protein match is: unknown protein (TAIR:AT3G54310.1); Has 35333 Blast hits to 34131 proteins in 2444 species: Archae - 798; Bacteria - 22429; Metazoa - 974; Fungi - 991; Plants - 531; Viruses - 0; Other Eukaryotes - 9610 (source: NCBI BLink).	-	PTHR35481,PTHR35481:SF1	-	-	-	-
19	3358978	5.02e-08	Cu65	Potri.019G029900	3366463	3370857	+	5'	7485	19_3358978	7.2993	-	Potri.019G029900	-	PTHR35481,PTHR35481:SF1	-	-	-	-	-	AT2G38430	-	-	-	-	unknown protein; BEST Arabidopsis thaliana protein match is: unknown protein (TAIR:AT3G54310.1); Has 35333 Blast hits to 34131 proteins in 2444 species: Archae - 798; Bacteria - 22429; Metazoa - 974; Fungi - 991; Plants - 531; Viruses - 0; Other Eukaryotes - 9610 (source: NCBI BLink).	-	PTHR35481,PTHR35481:SF1	-	-	-	-
16	14007443	5.09e-08	Mo98	Potri.016G137200	13998474	14002704	+	3'	4739	16_14007443	7.29328	-	Potri.016G137200	PF03647	PTHR12668,PTHR12668:SF19	KOG4267	-	-	GO:0016020	-	AT2G38550	-	Transmembrane proteins 14C	Transmembrane proteins 14C	-	Transmembrane proteins 14C; INVOLVED IN: biological_process unknown; LOCATED IN: mitochondrion, chloroplast, plastid, chloroplast inner membrane, chloroplast envelope; EXPRESSED IN: 23 plant structures; EXPRESSED DURING: 13 growth stages; CONTAINS InterPro DOMAIN/s: Uncharacterised protein family UPF0136, Transmembrane (InterPro:IPR005349); BEST Arabidopsis thaliana protein match is: Transmembran…	PF03647	PTHR12668,PTHR12668:SF19	KOG4267	-	-	GO:0016020
16	14007443	5.09e-08	Mo98	Potri.016G137300	14002260	14008596	-	in gene	0	16_14007443	7.29328	-	Potri.016G137300	PF02225	PTHR22765,PTHR22765:SF58	-	-	-	-	-	AT3G52850	ATELP	vacuolar sorting receptor homolog 1	vacuolar sorting receptor homolog 1	Encodes the Vacuolar Sorting Receptor-1 (VSR-1)/Epidermal Growth Factor Receptor-like protein1(VSR-1/ATELP1). Binds vacuolar targeting signals. Involved in sorting seed storage proteins into vacuoles.	vacuolar sorting receptor homolog 1 (VSR1); FUNCTIONS IN: amino-terminal vacuolar sorting propeptide binding; INVOLVED IN: Golgi to vacuole transport, vacuolar transport, protein targeting to vacuole; LOCATED IN: trans-Golgi network, Golgi apparatus, plasma membrane, integral to plasma membrane, Golgi transport complex; EXPRESSED IN: 24 plant structures; EXPRESSED DURING: 13 growth stages; CONTAI…	PF02225	PTHR22765,PTHR22765:SF58	-	-	-	-
16	14007443	5.09e-08	Mo98	Potri.016G137400	14015822	14017597	+	5'	8379	16_14007443	7.29328	-	Potri.016G137400	PF00067	PTHR24298,PTHR24298:SF86	KOG0156	1.14.13.120	-	GO:0055114,GO:0020037,GO:0016705,GO:0005506	-	AT3G26320	CYP71B36	cytochrome P450, family 71, subfamily B, polypeptide 36	cytochrome P450, family 71, subfamily B, polypeptide 36	putative cytochrome P450	cytochrome P450, family 71, subfamily B, polypeptide 36 (CYP71B36); FUNCTIONS IN: electron carrier activity, monooxygenase activity, iron ion binding, oxygen binding, heme binding; INVOLVED IN: oxidation reduction; LOCATED IN: cellular_component unknown; EXPRESSED IN: 8 plant structures; EXPRESSED DURING: LP.06 six leaves visible, LP.04 four leaves visible, LP.10 ten leaves visible, LP.02 two lea…	PF00067	PTHR24298,PTHR24298:SF85	-	1.14.13.68	K00517	GO:0055114,GO:0020037,GO:0016705,GO:0005506
4	15793456	5.28e-08	Ni60	Potri.004G136800	15785466	15785681	+	3'	7775	4_15793456	7.27737	-	Potri.004G136800	-	-	-	-	-	-	-	-	-	-	-	-	-	-	-	-	-	-	-
4	17444647	5.33e-08	Cu65	Potri.004G152400	17421330	17438179	-	3'	6468	4_17444647	7.27327	-	Potri.004G152400	PF00613,PF00454	PTHR10048,PTHR10048:SF15	-	2.7.1.67	K00888	GO:0016773,GO:0048015,GO:0046854	-	AT1G49340	ATPI4K ALPHA	Phosphatidylinositol 3- and 4-kinase family protein	Phosphatidylinositol 3- and 4-kinase family protein	Encodes a phosphatidylinositol 4-kinase that is expressed in inflorescences and shoots.	ATPI4K ALPHA; FUNCTIONS IN: 1-phosphatidylinositol 4-kinase activity, inositol or phosphatidylinositol kinase activity; INVOLVED IN: protein amino acid phosphorylation; LOCATED IN: plasma membrane; EXPRESSED IN: shoot, male gametophyte, flower, pollen tube; EXPRESSED DURING: L mature pollen stage, M germinated pollen stage; CONTAINS InterPro DOMAIN/s: Phosphoinositide 3-kinase, accessory (PIK) do…	PF00613,PF00454	PTHR10048,PTHR10048:SF15	-	2.7.1.67	K00888	GO:0016773,GO:0048015,GO:0046854
4	17444647	5.33e-08	Cu65	Potri.004G152500	17442848	17443057	-	3'	1590	4_17444647	7.27327	-	Potri.004G152500	-	PTHR34272	-	-	-	-	-	AT2G16190	-	-	-	-	BEST Arabidopsis thaliana protein match is: hydroxyproline-rich glycoprotein family protein (TAIR:AT1G49330.1); Has 77 Blast hits to 77 proteins in 25 species: Archae - 0; Bacteria - 0; Metazoa - 6; Fungi - 13; Plants - 56; Viruses - 0; Other Eukaryotes - 2 (source: NCBI BLink).	-	-	-	-	-	-
4	17444647	5.33e-08	Cu65	Potri.004G152600	17446134	17447150	-	5'	1487	4_17444647	7.27327	-	Potri.004G152600	-	PTHR34272	-	-	-	-	-	AT1G49330	-	hydroxyproline-rich glycoprotein family protein	hydroxyproline-rich glycoprotein family protein	-	hydroxyproline-rich glycoprotein family protein; BEST Arabidopsis thaliana protein match is: unknown protein (TAIR:AT2G16190.1); Has 882 Blast hits to 731 proteins in 140 species: Archae - 0; Bacteria - 49; Metazoa - 218; Fungi - 71; Plants - 381; Viruses - 66; Other Eukaryotes - 97 (source: NCBI BLink).	-	PTHR34272	-	-	-	-
4	17444647	5.33e-08	Cu65	Potri.004G152700	17450768	17452288	+	5'	6121	4_17444647	7.27327	-	Potri.004G152700	-	PTHR35989,PTHR35989:SF1	-	-	-	-	-	AT1G11760	MED32	-	-	-	MED32; Has 41 Blast hits to 40 proteins in 14 species: Archae - 0; Bacteria - 0; Metazoa - 0; Fungi - 0; Plants - 41; Viruses - 0; Other Eukaryotes - 0 (source: NCBI BLink).	-	PTHR35989,PTHR35989:SF1	-	-	-	-
2	23862173	5.55e-08	Cu65	Potri.002G247900	23852287	23855302	-	3'	6871	2_23862173	7.25571	-	Potri.002G247900	PF07983,PF00332	PTHR32227,PTHR32227:SF65	-	3.2.1.39	-	GO:0005975,GO:0004553	-	AT3G07320	-	O-Glycosyl hydrolases family 17 protein	O-Glycosyl hydrolases family 17 protein	-	O-Glycosyl hydrolases family 17 protein; FUNCTIONS IN: cation binding, hydrolase activity, hydrolyzing O-glycosyl compounds, catalytic activity; INVOLVED IN: carbohydrate metabolic process; LOCATED IN: plant-type cell wall; EXPRESSED IN: 24 plant structures; EXPRESSED DURING: 15 growth stages; CONTAINS InterPro DOMAIN/s: X8 (InterPro:IPR012946), Glycoside hydrolase, catalytic core (InterPro:IPR01…	PF07983,PF00332	PTHR32227,PTHR32227:SF65	-	3.2.1.39	-	GO:0005975,GO:0004553
2	23862173	5.55e-08	Cu65	Potri.002G248000	23864395	23869373	-	5'	2222	2_23862173	7.25571	-	Potri.002G248000	-	-	-	-	-	-	-	-	-	-	-	-	-	-	-	-	-	-	-
2	23862173	5.55e-08	Cu65	Potri.002G248100	23870091	23872073	+	5'	7918	2_23862173	7.25571	-	Potri.002G248100	PF12854,PF13041	PTHR24015,PTHR24015:SF355	-	-	-	-	-	AT3G25210	-	Tetratricopeptide repeat (TPR)-like superfamily protein	Tetratricopeptide repeat (TPR)-like superfamily protein	-	Tetratricopeptide repeat (TPR)-like superfamily protein; FUNCTIONS IN: molecular_function unknown; INVOLVED IN: biological_process unknown; LOCATED IN: chloroplast; EXPRESSED IN: 19 plant structures; EXPRESSED DURING: 13 growth stages; CONTAINS InterPro DOMAIN/s: Pentatricopeptide repeat (InterPro:IPR002885); BEST Arabidopsis thaliana protein match is: Tetratricopeptide repeat (TPR)-like superfam…	PF13041	PTHR24015,PTHR24015:SF355	-	-	-	-
754	9365	5.58e-08	Cu65	Potri.T161900	13865	15348	-	5'	4500	754_9365	7.25337	-	Potri.T161900	-	PTHR33176	-	-	-	-	-	-	-	-	-	-	-	-	-	-	-	-	-
1	11630024	5.58e-08	As75	Potri.001G142900	11626831	11627568	+	3'	2456	1_11630024	7.25337	-	Potri.001G142900	PF13912	PTHR26374,PTHR26374:SF167	-	-	-	-	C2H2	AT4G17810	-	C2H2 and C2HC zinc fingers superfamily protein	C2H2 and C2HC zinc fingers superfamily protein	-	C2H2 and C2HC zinc fingers superfamily protein; FUNCTIONS IN: sequence-specific DNA binding transcription factor activity, zinc ion binding, nucleic acid binding; INVOLVED IN: regulation of transcription; LOCATED IN: intracellular; EXPRESSED IN: 8 plant structures; EXPRESSED DURING: 7 growth stages; CONTAINS InterPro DOMAIN/s: Zinc finger, C2H2-like (InterPro:IPR015880), Zinc finger, C2H2-type (I…	PF13912	PTHR26374,PTHR26374:SF167	-	-	-	-
1	11630024	5.58e-08	As75	Potri.001G143000	11635023	11635876	+	5'	4999	1_11630024	7.25337	-	Potri.001G143000	-	-	-	-	-	-	-	-	-	-	-	-	-	-	-	-	-	-	-
1	11630024	5.58e-08	As75	Potri.001G143100	11637088	11637660	-	5'	7064	1_11630024	7.25337	-	Potri.001G143100	-	PTHR23500,PTHR23500:SF180	-	-	-	-	-	AT4G35300	TMT2	tonoplast monosaccharide transporter2	tonoplast monosaccharide transporter2	-	tonoplast monosaccharide transporter2 (TMT2); CONTAINS InterPro DOMAIN/s: Sugar transporter, conserved site (InterPro:IPR005829), Major facilitator superfamily (InterPro:IPR020846), General substrate transporter (InterPro:IPR005828), Sugar/inositol transporter (InterPro:IPR003663), Major facilitator superfamily, general substrate transporter (InterPro:IPR016196); BEST Arabidopsis thaliana protein…	PF07690,PF00083	PTHR23500,PTHR23500:SF96	KOG0254	-	-	GO:0055085,GO:0016021,GO:0022857
1	11630024	5.58e-08	As75	Potri.001G143200	11639488	11647231	+	5'	9464	1_11630024	7.25337	-	Potri.001G143200	PF07687,PF01546	PTHR11014,PTHR11014:SF109	KOG2276	3.5.1.16	K01438	GO:0016787,GO:0008152	-	AT4G17830	-	Peptidase M20/M25/M40 family protein	Peptidase M20/M25/M40 family protein	-	Peptidase M20/M25/M40 family protein; FUNCTIONS IN: metallopeptidase activity, hydrolase activity; INVOLVED IN: proteolysis, metabolic process; EXPRESSED IN: 25 plant structures; EXPRESSED DURING: 13 growth stages; CONTAINS InterPro DOMAIN/s: Peptidase M20 (InterPro:IPR002933), Peptidase M20, dimerisation (InterPro:IPR011650); Has 6221 Blast hits to 6219 proteins in 1645 species: Archae - 204; Ba…	PF07687,PF01546	PTHR11014,PTHR11014:SF109	-	3.5.1.16	K01438	GO:0016787,GO:0008152
17	2312238	5.71e-08	Na23	Potri.017G025100	2309796	2311312	+	3'	926	17_2312238	7.24336	-	Potri.017G025100	PF03140	PTHR31170	-	-	-	-	-	AT3G60470	-	Plant protein of unknown function (DUF247)	Plant protein of unknown function (DUF247)	-	Plant protein of unknown function (DUF247); CONTAINS InterPro DOMAIN/s: Protein of unknown function DUF247, plant (InterPro:IPR004158); BEST Arabidopsis thaliana protein match is: Plant protein of unknown function (DUF247) (TAIR:AT2G28580.1); Has 1401 Blast hits to 907 proteins in 17 species: Archae - 0; Bacteria - 0; Metazoa - 0; Fungi - 0; Plants - 1401; Viruses - 0; Other Eukaryotes - 0 (sourc…	PF03140	PTHR31170	-	-	-	-
15	13646780	5.93e-08	Cu65	Potri.015G122500	13635414	13638317	+	3'	8463	15_13646780	7.22695	-	Potri.015G122500	PF01597	PTHR11715,PTHR11715:SF9	KOG3373	-	K02437	-	-	AT2G35120	-	Single hybrid motif superfamily protein	Single hybrid motif superfamily protein	-	Single hybrid motif superfamily protein; FUNCTIONS IN: glycine dehydrogenase (decarboxylating) activity, ATP binding; INVOLVED IN: glycine catabolic process, glycine decarboxylation via glycine cleavage system; LOCATED IN: mitochondrion, glycine cleavage complex; EXPRESSED IN: 22 plant structures; EXPRESSED DURING: 13 growth stages; CONTAINS InterPro DOMAIN/s: 2-oxo acid dehydrogenase, lipoyl-bin…	PF01597	PTHR11715,PTHR11715:SF9	KOG3373	-	K02437	-
15	13646780	5.93e-08	Cu65	Potri.015G122600	13638401	13638953	+	3'	7827	15_13646780	7.22695	-	Potri.015G122600	-	-	-	-	-	-	-	-	-	-	-	-	-	-	-	-	-	-	-
15	13646780	5.93e-08	Cu65	Potri.015G122700	13639994	13642082	-	3'	4698	15_13646780	7.22695	-	Potri.015G122700	PF01734	PTHR32241,PTHR32241:SF6	KOG0513	-	-	GO:0006629	-	AT3G54950	PLA IIIA	patatin-like protein 6	patatin-like protein 6	Encodes pPLAIIIbeta, a member of the Group 3 patatin-related phospholipases. pPLAIIIbeta hydrolyzes phospholipids and galactolipids and additionally has acyl-CoA thioesterase activity. Alterations of pPLAIII&#946; result in changes in lipid levels and composition.	patatin-like protein 6 (PLA IIIA); CONTAINS InterPro DOMAIN/s: Acyl transferase/acyl hydrolase/lysophospholipase (InterPro:IPR016035), Patatin (InterPro:IPR002641); BEST Arabidopsis thaliana protein match is: PATATIN-like protein 6 (TAIR:AT2G39220.1); Has 1058 Blast hits to 1055 proteins in 202 species: Archae - 0; Bacteria - 325; Metazoa - 24; Fungi - 32; Plants - 544; Viruses - 0; Other Eukaryo…	PF01734	PTHR32241,PTHR32241:SF3	KOG0513	-	-	GO:0006629
15	13646780	5.93e-08	Cu65	Potri.015G122800	13653311	13657757	+	5'	6531	15_13646780	7.22695	-	Potri.015G122800	PF00118	PTHR11353,PTHR11353:SF99	-	-	-	GO:0005524	-	AT5G18820	EMB3007	TCP-1/cpn60 chaperonin family protein	TCP-1/cpn60 chaperonin family protein	Encodes a subunit of chloroplasts chaperonins that are involved in mediating the folding of newly synthesized, translocated, or stress-denatured proteins. Cpn60 subunits are: Cpn60alpha1 (At2g28000), AtCpn60alpha2 (At5g18820), AtCpn60beta1 (At1g55490), AtCpn60beta2 (At3g13470), AtCpn60beta3 (At5g56500), AtCpn60beta4 (At1g26230).	embryo defective 3007 (EMB3007); FUNCTIONS IN: ATP binding; INVOLVED IN: embryo development ending in seed dormancy; LOCATED IN: chloroplast, cytoplasm; EXPRESSED IN: 14 plant structures; EXPRESSED DURING: 8 growth stages; CONTAINS InterPro DOMAIN/s: Chaperonin Cpn60/TCP-1 (InterPro:IPR002423), Chaperonin Cpn60 (InterPro:IPR001844); BEST Arabidopsis thaliana protein match is: chaperonin-60alpha (…	PF00118	PTHR11353,PTHR11353:SF99	-	-	-	GO:0005524
10	1593496	5.93e-08	Al27	Potri.010G011900	1581964	1595539	+	in gene	0	10_1593496	7.22695	-	Potri.010G011900	PF16113,PF00725,PF02737	PTHR23309,PTHR23309:SF23	KOG1683	1.1.1.35,5.1.2.3,5.3.3.8,4.2.1.55,4.2.1.17	K10527	GO:0055114,GO:0016491,GO:0006631,GO:0003857	-	AT3G06860	ATMFP2	multifunctional protein 2	multifunctional protein 2	Encodes a multifunctional protein. Involved in peroxisomal fatty acid beta oxidation. Loss-of-function mutant lacks hydroxyacyl-CoA dehydrogenase activity and have reduced levels of long-chain enoyl-CoA hydratase activity. The mutant has fewer but larger peroxisomes.	multifunctional protein 2 (MFP2); FUNCTIONS IN: enoyl-CoA hydratase activity, 3-hydroxyacyl-CoA dehydrogenase activity; INVOLVED IN: fatty acid beta-oxidation; LOCATED IN: nucleolus, cell wall, peroxisome; EXPRESSED IN: 24 plant structures; EXPRESSED DURING: 14 growth stages; CONTAINS InterPro DOMAIN/s: Enoyl-CoA hydratase/isomerase, conserved site (InterPro:IPR018376), 3-hydroxyacyl-CoA dehydrog…	PF16113,PF00725,PF02737	PTHR23309,PTHR23309:SF23	KOG1683	5.1.2.3,1.1.1.35,5.3.3.8,4.2.1.55,4.2.1.17	K10527	GO:0055114,GO:0016491,GO:0006631,GO:0003857
1	39736232	5.93e-08	Al27	Potri.001G381300	39725628	39731752	+	3'	4480	1_39736232	7.22695	-	Potri.001G381300	PF06293	PTHR24055,PTHR24055:SF200	KOG0660	2.7.11.24	K04371	GO:0016773,GO:0016020,GO:0005524	-	AT3G14720	ATMPK19	MAP kinase 19	MAP kinase 19	member of MAP Kinase	MAP kinase 19 (MPK19); CONTAINS InterPro DOMAIN/s: Protein kinase, ATP binding site (InterPro:IPR017441), MAP kinase, conserved site (InterPro:IPR003527), Protein kinase, catalytic domain (InterPro:IPR000719), Serine/threonine-protein kinase domain (InterPro:IPR002290), Serine/threonine-protein kinase-like domain (InterPro:IPR017442), Protein kinase-like domain (InterPro:IPR011009); BEST Arabidop…	PF06293	PTHR24055,PTHR24055:SF200	KOG0660	2.7.11.24	K04371	GO:0016773,GO:0016020,GO:0005524
1	39736232	5.93e-08	Al27	Potri.001G381400	39731802	39733662	-	3'	2570	1_39736232	7.22695	-	Potri.001G381400	-	PTHR33916,PTHR33916:SF1	-	-	-	-	-	AT1G17030	-	-	-	-	unknown protein; FUNCTIONS IN: molecular_function unknown; INVOLVED IN: biological_process unknown; LOCATED IN: endomembrane system; BEST Arabidopsis thaliana protein match is: unknown protein (TAIR:AT2G47010.2); Has 70 Blast hits to 70 proteins in 13 species: Archae - 0; Bacteria - 0; Metazoa - 0; Fungi - 0; Plants - 69; Viruses - 0; Other Eukaryotes - 1 (source: NCBI BLink).	-	PTHR33916,PTHR33916:SF1	-	-	-	-
6	25344808	6e-08	Mo98	Potri.006G245900	25337833	25339670	-	3'	5138	6_25344808	7.22185	-	Potri.006G245900	PF16983	PTHR31970,PTHR31970:SF3	-	-	-	-	-	AT2G25680	MOT1	molybdate transporter 1	molybdate transporter 1	Encodes a high-affinity molybdate transporter. Mutant has reduced concentrations of molybdate in roots and shoots, and reduced shoot and root length when growing on Mo-limited medium.	molybdate transporter 1 (MOT1); FUNCTIONS IN: molybdate ion transmembrane transporter activity, sulfate transmembrane transporter activity; INVOLVED IN: molybdate ion transport; LOCATED IN: mitochondrion, vacuole; EXPRESSED IN: 13 plant structures; EXPRESSED DURING: LP.04 four leaves visible, 4 anthesis, petal differentiation and expansion stage; BEST Arabidopsis thaliana protein match is: sulfat…	PF16983	PTHR31970,PTHR31970:SF3	-	-	-	-
6	25344808	6e-08	Mo98	Potri.006G246000	25345115	25347031	+	5'	307	6_25344808	7.22185	-	Potri.006G246000	PF16983	PTHR31970,PTHR31970:SF3	-	-	-	-	-	AT2G25680	MOT1	molybdate transporter 1	molybdate transporter 1	Encodes a high-affinity molybdate transporter. Mutant has reduced concentrations of molybdate in roots and shoots, and reduced shoot and root length when growing on Mo-limited medium.	molybdate transporter 1 (MOT1); FUNCTIONS IN: molybdate ion transmembrane transporter activity, sulfate transmembrane transporter activity; INVOLVED IN: molybdate ion transport; LOCATED IN: mitochondrion, vacuole; EXPRESSED IN: 13 plant structures; EXPRESSED DURING: LP.04 four leaves visible, 4 anthesis, petal differentiation and expansion stage; BEST Arabidopsis thaliana protein match is: sulfat…	PF16983	PTHR31970,PTHR31970:SF3	-	-	-	-
6	25344808	6e-08	Mo98	Potri.006G246100	25350095	25356024	-	5'	5287	6_25344808	7.22185	-	Potri.006G246100	PF01412	PTHR23180,PTHR23180:SF266	KOG0702	-	-	GO:0005096	-	AT4G32630	-	ArfGap/RecO-like zinc finger domain-containing protein	ArfGap/RecO-like zinc finger domain-containing protein	-	ArfGap/RecO-like zinc finger domain-containing protein; FUNCTIONS IN: ARF GTPase activator activity, zinc ion binding; INVOLVED IN: regulation of ARF GTPase activity; LOCATED IN: cellular_component unknown; EXPRESSED IN: 18 plant structures; EXPRESSED DURING: 10 growth stages; CONTAINS InterPro DOMAIN/s: Arf GTPase activating protein (InterPro:IPR001164); BEST Arabidopsis thaliana protein match i…	PF01412	PTHR23180,PTHR23180:SF266	-	-	-	GO:0005096
11	7164956	6.08e-08	Al27	Potri.011G073700	7152813	7157089	+	3'	7867	11_7164956	7.2161	-	Potri.011G073700	PF11721,PF07714	PTHR27006,PTHR27006:SF8	KOG1187	2.7.11.1	-	GO:0006468,GO:0004672	-	AT1G29740	-	Leucine-rich repeat transmembrane protein kinase	Leucine-rich repeat transmembrane protein kinase	-	Leucine-rich repeat transmembrane protein kinase; FUNCTIONS IN: kinase activity; INVOLVED IN: protein amino acid phosphorylation; LOCATED IN: endomembrane system; CONTAINS InterPro DOMAIN/s: Protein kinase, ATP binding site (InterPro:IPR017441), Serine/threonine-protein kinase domain (InterPro:IPR002290), Serine/threonine-protein kinase-like domain (InterPro:IPR017442), Serine/threonine-protein k…	PF00069,PF11721	PTHR27006,PTHR27006:SF8	KOG1187	2.7.11.1	-	GO:0006468,GO:0005524,GO:0004672
4	17442856	6.11e-08	Cu65	Potri.004G152400	17421330	17438179	-	3'	4677	4_17442856	7.21396	-	Potri.004G152400	PF00613,PF00454	PTHR10048,PTHR10048:SF15	-	2.7.1.67	K00888	GO:0016773,GO:0048015,GO:0046854	-	AT1G49340	ATPI4K ALPHA	Phosphatidylinositol 3- and 4-kinase family protein	Phosphatidylinositol 3- and 4-kinase family protein	Encodes a phosphatidylinositol 4-kinase that is expressed in inflorescences and shoots.	ATPI4K ALPHA; FUNCTIONS IN: 1-phosphatidylinositol 4-kinase activity, inositol or phosphatidylinositol kinase activity; INVOLVED IN: protein amino acid phosphorylation; LOCATED IN: plasma membrane; EXPRESSED IN: shoot, male gametophyte, flower, pollen tube; EXPRESSED DURING: L mature pollen stage, M germinated pollen stage; CONTAINS InterPro DOMAIN/s: Phosphoinositide 3-kinase, accessory (PIK) do…	PF00613,PF00454	PTHR10048,PTHR10048:SF15	-	2.7.1.67	K00888	GO:0016773,GO:0048015,GO:0046854
4	17442856	6.11e-08	Cu65	Potri.004G152500	17442848	17443057	-	in gene	0	4_17442856	7.21396	-	Potri.004G152500	-	PTHR34272	-	-	-	-	-	AT2G16190	-	-	-	-	BEST Arabidopsis thaliana protein match is: hydroxyproline-rich glycoprotein family protein (TAIR:AT1G49330.1); Has 77 Blast hits to 77 proteins in 25 species: Archae - 0; Bacteria - 0; Metazoa - 6; Fungi - 13; Plants - 56; Viruses - 0; Other Eukaryotes - 2 (source: NCBI BLink).	-	-	-	-	-	-
4	17442856	6.11e-08	Cu65	Potri.004G152600	17446134	17447150	-	5'	3278	4_17442856	7.21396	-	Potri.004G152600	-	PTHR34272	-	-	-	-	-	AT1G49330	-	hydroxyproline-rich glycoprotein family protein	hydroxyproline-rich glycoprotein family protein	-	hydroxyproline-rich glycoprotein family protein; BEST Arabidopsis thaliana protein match is: unknown protein (TAIR:AT2G16190.1); Has 882 Blast hits to 731 proteins in 140 species: Archae - 0; Bacteria - 49; Metazoa - 218; Fungi - 71; Plants - 381; Viruses - 66; Other Eukaryotes - 97 (source: NCBI BLink).	-	PTHR34272	-	-	-	-
4	17442856	6.11e-08	Cu65	Potri.004G152700	17450768	17452288	+	5'	7912	4_17442856	7.21396	-	Potri.004G152700	-	PTHR35989,PTHR35989:SF1	-	-	-	-	-	AT1G11760	MED32	-	-	-	MED32; Has 41 Blast hits to 40 proteins in 14 species: Archae - 0; Bacteria - 0; Metazoa - 0; Fungi - 0; Plants - 41; Viruses - 0; Other Eukaryotes - 0 (source: NCBI BLink).	-	PTHR35989,PTHR35989:SF1	-	-	-	-
2	14654817	6.12e-08	Al27	Potri.002G186700	14662540	14664042	-	5'	7723	2_14654817	7.21325	-	Potri.002G186700	-	PTHR33054	-	-	-	-	-	-	-	-	-	-	-	-	-	-	-	-	-
8	8561859	6.13e-08	Cu65	Potri.008G130200	8539584	8554404	+	3'	7455	8_8561859	7.21254	-	Potri.008G130200	PF00485	PTHR10285,PTHR10285:SF53	KOG4203	2.7.1.48	-	GO:0016301,GO:0008152,GO:0005524	-	AT2G01460	-	P-loop containing nucleoside triphosphate hydrolases superfamily protein	P-loop containing nucleoside triphosphate hydrolases superfamily protein	-	P-loop containing nucleoside triphosphate hydrolases superfamily protein; FUNCTIONS IN: nucleoside-triphosphatase activity, kinase activity, nucleotide binding, phosphotransferase activity, alcohol group as acceptor, ATP binding; INVOLVED IN: biosynthetic process, metabolic process; LOCATED IN: cellular_component unknown; EXPRESSED IN: 6 plant structures; EXPRESSED DURING: 4 anthesis; CONTAINS In…	PF00485	PTHR10285,PTHR10285:SF53	KOG4203	2.7.1.48	-	GO:0016301,GO:0008152,GO:0005524
8	8561859	6.13e-08	Cu65	Potri.008G130300	8555801	8561469	-	3'	390	8_8561859	7.21254	-	Potri.008G130300	-	PTHR23284	KOG0771	-	K14003	-	-	AT2G01470	ATSEC12	SEC12P-like 2 protein	SEC12P-like 2 protein	Sec12p-like protein (GTP exchange protein) that functionally complements yeast sec12 null mutant. Protein is localized to the ER.	SEC12P-like 2 protein (STL2P); FUNCTIONS IN: nucleotide binding; INVOLVED IN: ER to Golgi vesicle-mediated transport; LOCATED IN: integral to endoplasmic reticulum membrane, endoplasmic reticulum, plasma membrane, membrane; EXPRESSED IN: 25 plant structures; EXPRESSED DURING: 13 growth stages; CONTAINS InterPro DOMAIN/s: WD40 repeat-like-containing domain (InterPro:IPR011046), WD40-repeat-contain…	-	PTHR23284	KOG0771	-	K14003	-
8	8561859	6.13e-08	Cu65	Potri.008G130400	8563566	8569270	-	5'	1707	8_8561859	7.21254	-	Potri.008G130400	PF01740,PF00916	PTHR11814,PTHR11814:SF93	-	-	K17471	GO:0016021,GO:0015116,GO:0008272,GO:0055085,GO:0016020,GO:0008271	-	AT1G23090	AST91	sulfate transporter 91	sulfate transporter 91	Encodes AST91 mRNA for sulfate transporter.	sulfate transporter 91 (AST91); FUNCTIONS IN: sulfate transmembrane transporter activity; INVOLVED IN: sulfate transport, transport, transmembrane transport; LOCATED IN: integral to membrane, membrane; EXPRESSED IN: 22 plant structures; EXPRESSED DURING: 13 growth stages; CONTAINS InterPro DOMAIN/s: Sulphate transporter (InterPro:IPR011547), Sulphate transporter/antisigma-factor antagonist STAS (…	PF01740,PF00916	PTHR11814,PTHR11814:SF93	-	-	K17471	GO:0016021,GO:0015116,GO:0008272,GO:0055085,GO:0016020,GO:0008271
6	21725313	6.15e-08	Al27	Potri.006G202300	21721690	21722448	+	3'	2865	6_21725313	7.21112	-	Potri.006G202300	PF00828	PTHR11721,PTHR11721:SF6	KOG1742	-	K02900	-	-	AT1G70600	-	Ribosomal protein L18e/L15 superfamily protein	Ribosomal protein L18e/L15 superfamily protein	-	Ribosomal protein L18e/L15 superfamily protein; FUNCTIONS IN: structural constituent of ribosome; INVOLVED IN: translation; LOCATED IN: cytosolic ribosome, ribosome, cytosolic large ribosomal subunit, membrane; EXPRESSED IN: guard cell, leaf; CONTAINS InterPro DOMAIN/s: Ribosomal protein L18e/L15 (InterPro:IPR021131), Ribosomal protein L15, conserved site (InterPro:IPR001196); BEST Arabidopsis th…	PF00828	PTHR11721,PTHR11721:SF6	KOG1742	-	K02900	-
6	21725313	6.15e-08	Al27	Potri.006G202400	21727027	21728029	+	5'	1714	6_21725313	7.21112	-	Potri.006G202400	-	PTHR35741,PTHR35741:SF1	-	-	-	-	-	AT4G07940	-	Protein of unknown function (DUF3245)	Protein of unknown function (DUF3245)	-	Protein of unknown function (DUF3245); CONTAINS InterPro DOMAIN/s: Protein of unknown function DUF3245 (InterPro:IPR021641); BEST Arabidopsis thaliana protein match is: Protein of unknown function (DUF3245) (TAIR:AT3G61370.1); Has 36 Blast hits to 36 proteins in 10 species: Archae - 0; Bacteria - 0; Metazoa - 0; Fungi - 0; Plants - 36; Viruses - 0; Other Eukaryotes - 0 (source: NCBI BLink).	PF11595	PTHR35741,PTHR35741:SF1	-	-	-	-
6	21725313	6.15e-08	Al27	Potri.006G202500	21732370	21733236	+	5'	7057	6_21725313	7.21112	-	Potri.006G202500	PF02701	PTHR31992	-	-	-	GO:0006355,GO:0003677	Dof	AT3G52440	-	Dof-type zinc finger DNA-binding family protein	Dof-type zinc finger DNA-binding family protein	-	Dof-type zinc finger DNA-binding family protein; CONTAINS InterPro DOMAIN/s: Zinc finger, Dof-type (InterPro:IPR003851); BEST Arabidopsis thaliana protein match is: Dof-type zinc finger DNA-binding family protein (TAIR:AT1G21340.1); Has 1099 Blast hits to 1090 proteins in 57 species: Archae - 0; Bacteria - 0; Metazoa - 2; Fungi - 0; Plants - 1092; Viruses - 0; Other Eukaryotes - 5 (source: NCBI B…	PF02701	PTHR31992,PTHR31992:SF8	-	-	-	GO:0006355,GO:0003677
1	740	6.18e-08	Na23	Potri.001G000100	1660	2502	-	5'	920	1_740	7.20901	-
1	740	6.18e-08	Na23	Potri.001G000200	2906	6646	-	5'	2166	1_740	7.20901	-	Potri.001G000200	PF14111	PTHR31286,PTHR31286:SF2	-	3.5.1.28,3.2.1.96	-	-	-	AT2G01050	-	zinc ion binding;nucleic acid binding	zinc ion binding;nucleic acid binding	-	zinc ion binding;nucleic acid binding; FUNCTIONS IN: zinc ion binding, nucleic acid binding; INVOLVED IN: biological_process unknown; LOCATED IN: cellular_component unknown; CONTAINS InterPro DOMAIN/s: Zinc finger, CCHC-type (InterPro:IPR001878); BEST Arabidopsis thaliana protein match is: unknown protein (TAIR:AT3G31430.1); Has 369 Blast hits to 365 proteins in 15 species: Archae - 0; Bacteria -…	PF14392,PF14111	PTHR31286,PTHR31286:SF7	-	-	-	-
1	740	6.18e-08	Na23	Potri.001G000400	8391	12483	-	5'	7651	1_740	7.20901	-	Potri.001G000400	PF11779	PTHR33727	-	-	-	-	-	AT2G30942	-	Protein of unknown function (DUF3317)	Protein of unknown function (DUF3317)	-	Protein of unknown function (DUF3317); BEST Arabidopsis thaliana protein match is: Protein of unknown function (DUF3317) (TAIR:AT1G06515.2); Has 35333 Blast hits to 34131 proteins in 2444 species: Archae - 798; Bacteria - 22429; Metazoa - 974; Fungi - 991; Plants - 531; Viruses - 0; Other Eukaryotes - 9610 (source: NCBI BLink).	PF11779	PTHR33727	-	-	-	-
1	740	6.18e-08	Na23	Potri.001G000300	8391	8860	+	5'	7651	1_740	7.20901	-	Potri.001G000300	-	-	-	-	-	-	-	-	-	-	-	-	-	-	-	-	-	-	-
4	17390353	6.23e-08	Cu65	Potri.004G151700	17384177	17385839	+	3'	4514	4_17390353	7.20551	-	Potri.004G151700	PF00083	PTHR23500,PTHR23500:SF109	-	-	-	GO:0055085,GO:0022857,GO:0016021	-	AT3G18830	ATPLT5	polyol/monosaccharide transporter 5	polyol/monosaccharide transporter 5	This gene encodes a plasma membrane-localized polyol/cyclitol/monosaccharide-H+-symporter. The symporter is able to catalyze the energy-dependent membrane passage of a wide range of linear polyols (three to six carbon backbone), of cyclic polyols (<i>myo</i>-inositol), and of numerous monosaccharides, including pyranose ring-forming and furanose ring-forming hexoses and pentoses. This gene belong…	polyol/monosaccharide transporter 5 (PMT5); FUNCTIONS IN: in 11 functions; INVOLVED IN: transport, transmembrane transport; LOCATED IN: plasma membrane, membrane; EXPRESSED IN: 31 plant structures; EXPRESSED DURING: 13 growth stages; CONTAINS InterPro DOMAIN/s: Sugar transporter, conserved site (InterPro:IPR005829), Major facilitator superfamily (InterPro:IPR020846), General substrate transporter…	PF00083	PTHR23500,PTHR23500:SF109	KOG0254	-	-	GO:0055085,GO:0022857,GO:0016021
4	17390353	6.23e-08	Cu65	Potri.004G151800	17385976	17386948	+	3'	3405	4_17390353	7.20551	-	Potri.004G151800	PF00067	PTHR24286,PTHR24286:SF74	-	-	-	GO:0055114,GO:0020037,GO:0016705,GO:0005506	-	AT5G05690	CBB3	Cytochrome P450 superfamily protein	Cytochrome P450 superfamily protein	Encodes a member of the CP90A family, a cytochrome P450 monooxygenase which converts 6-deoxocathasterone to 6-deoxoteasterone in the late C6 oxidation pathway and cathasterone to teasterone in the early C6 oxidation pathway of brassinolide biosynthesis. Expressed in cotyledons and leaves. Mutants display de-etiolation and derepression of light-induced genes in the dark, dwarfism, male sterility a…	CONSTITUTIVE PHOTOMORPHOGENIC DWARF (CPD); FUNCTIONS IN: electron carrier activity, monooxygenase activity, iron ion binding, oxygen binding, heme binding; INVOLVED IN: in 9 processes; EXPRESSED IN: 23 plant structures; EXPRESSED DURING: 13 growth stages; CONTAINS InterPro DOMAIN/s: Cytochrome P450 (InterPro:IPR001128), Cytochrome P450, E-class, group I (InterPro:IPR002401), Cytochrome P450, cons…	PF00067	PTHR24286,PTHR24286:SF44	KOG0157	-	-	GO:0055114,GO:0020037,GO:0016705,GO:0005506
4	17390353	6.23e-08	Cu65	Potri.004G151900	17391460	17392494	+	5'	1107	4_17390353	7.20551	-	Potri.004G151900	-	-	-	-	-	-	-	AT4G36730	GBF1	G-box binding factor 1	G-box binding factor 1	member of a gene family encoding basic leucine zipper proteins (GBFs) which bind the G-box	G-box binding factor 1 (GBF1); CONTAINS InterPro DOMAIN/s: Basic-leucine zipper (bZIP) transcription factor (InterPro:IPR004827), G-box binding, MFMR (InterPro:IPR012900), bZIP transcription factor, bZIP-1 (InterPro:IPR011616); BEST Arabidopsis thaliana protein match is: basic region/leucine zipper transcription factor 16 (TAIR:AT2G35530.1); Has 3891 Blast hits to 3827 proteins in 347 species: Ar…	PF00170,PF07777	PTHR22952,PTHR22952:SF123	KOG3119	-	K09060	GO:0043565,GO:0006355,GO:0003700
4	17390353	6.23e-08	Cu65	Potri.004G152000	17394422	17397013	-	5'	4069	4_17390353	7.20551	-	Potri.004G152000	PF13041,PF01535	PTHR24015,PTHR24015:SF714	-	-	-	-	-	AT3G18840	-	Tetratricopeptide repeat (TPR)-like superfamily protein	Tetratricopeptide repeat (TPR)-like superfamily protein	-	Tetratricopeptide repeat (TPR)-like superfamily protein; CONTAINS InterPro DOMAIN/s: Pentatricopeptide repeat (InterPro:IPR002885); BEST Arabidopsis thaliana protein match is: Pentatricopeptide repeat (PPR) superfamily protein (TAIR:AT2G13600.1); Has 42936 Blast hits to 13106 proteins in 190 species: Archae - 0; Bacteria - 3; Metazoa - 51; Fungi - 30; Plants - 42456; Viruses - 0; Other Eukaryotes…	PF13041,PF01535	PTHR24015,PTHR24015:SF714	-	-	-	-
4	17390353	6.23e-08	Cu65	Potri.004G152100	17397729	17401939	-	5'	7376	4_17390353	7.20551	-	Potri.004G152100	PF00294	PTHR10584,PTHR10584:SF188	KOG2855	-	-	-	-	AT1G49350	-	pfkB-like carbohydrate kinase family protein	pfkB-like carbohydrate kinase family protein	-	pfkB-like carbohydrate kinase family protein; FUNCTIONS IN: kinase activity, ribokinase activity; INVOLVED IN: D-ribose metabolic process; LOCATED IN: cellular_component unknown; EXPRESSED IN: 22 plant structures; EXPRESSED DURING: 13 growth stages; CONTAINS InterPro DOMAIN/s: Carbohydrate/purine kinase (InterPro:IPR011611), Ribokinase (InterPro:IPR002139), Carbohydrate/puine kinase, PfkB, conser…	PF00294	PTHR10584,PTHR10584:SF188	KOG2855	2.7.1.83	-	-
12	12521416	6.34e-08	Na23	Potri.012G100000	12518633	12519657	-	3'	1759	12_12521416	7.19791	-
12	12521416	6.34e-08	Na23	Potri.012G100100	12526501	12527294	+	5'	5085	12_12521416	7.19791	-	Potri.012G100100	PF11820	PTHR33128	-	-	-	-	-	AT3G48660	-	Protein of unknown function (DUF 3339)	Protein of unknown function (DUF 3339)	-	Protein of unknown function (DUF 3339); FUNCTIONS IN: molecular_function unknown; INVOLVED IN: biological_process unknown; LOCATED IN: endomembrane system; CONTAINS InterPro DOMAIN/s: Protein of unknown function DUF3339 (InterPro:IPR021775); BEST Arabidopsis thaliana protein match is: Protein of unknown function (DUF 3339) (TAIR:AT5G63500.1); Has 274 Blast hits to 269 proteins in 15 species: Arch…	PF11820	PTHR33128	-	-	-	-
13	2849930	6.47e-08	Al27	Potri.013G040700	2840235	2844724	+	3'	5206	13_2849930	7.1891	-	Potri.013G040700	PF00170,PF12498	PTHR22952,PTHR22952:SF90	-	-	-	GO:0043565,GO:0006355,GO:0003700	bZIP	AT5G28770	AtbZIP63	bZIP transcription factor family protein	bZIP transcription factor family protein	bZIP protein BZO2H3 mRNA, partial cds	BZO2H3; FUNCTIONS IN: DNA binding, protein heterodimerization activity, sequence-specific DNA binding transcription factor activity; INVOLVED IN: regulation of transcription, DNA-dependent; EXPRESSED IN: 22 plant structures; EXPRESSED DURING: 13 growth stages; CONTAINS InterPro DOMAIN/s: Basic-leucine zipper (bZIP) transcription factor (InterPro:IPR004827), bZIP transcription factor, bZIP-1 (Inte…	PF00170,PF12498	PTHR22952,PTHR22952:SF90	-	-	-	GO:0043565,GO:0006355,GO:0003700
13	2849930	6.47e-08	Al27	Potri.013G040800	2846577	2849394	-	3'	536	13_2849930	7.1891	-	Potri.013G040800	-	PTHR37238,PTHR37238:SF1	-	-	-	-	-	AT4G12540	-	-	-	-	unknown protein; Has 29 Blast hits to 26 proteins in 11 species: Archae - 2; Bacteria - 0; Metazoa - 0; Fungi - 0; Plants - 27; Viruses - 0; Other Eukaryotes - 0 (source: NCBI BLink).	-	PTHR37238,PTHR37238:SF1	-	-	-	-
1	4873	6.61e-08	Na23	Potri.001G000100	1660	2502	-	3'	2371	1_4873	7.1798	-
1	4873	6.61e-08	Na23	Potri.001G000200	2906	6646	-	in gene	0	1_4873	7.1798	-	Potri.001G000200	PF14111	PTHR31286,PTHR31286:SF2	-	3.5.1.28,3.2.1.96	-	-	-	AT2G01050	-	zinc ion binding;nucleic acid binding	zinc ion binding;nucleic acid binding	-	zinc ion binding;nucleic acid binding; FUNCTIONS IN: zinc ion binding, nucleic acid binding; INVOLVED IN: biological_process unknown; LOCATED IN: cellular_component unknown; CONTAINS InterPro DOMAIN/s: Zinc finger, CCHC-type (InterPro:IPR001878); BEST Arabidopsis thaliana protein match is: unknown protein (TAIR:AT3G31430.1); Has 369 Blast hits to 365 proteins in 15 species: Archae - 0; Bacteria -…	PF14392,PF14111	PTHR31286,PTHR31286:SF7	-	-	-	-
1	4873	6.61e-08	Na23	Potri.001G000400	8391	12483	-	5'	3518	1_4873	7.1798	-	Potri.001G000400	PF11779	PTHR33727	-	-	-	-	-	AT2G30942	-	Protein of unknown function (DUF3317)	Protein of unknown function (DUF3317)	-	Protein of unknown function (DUF3317); BEST Arabidopsis thaliana protein match is: Protein of unknown function (DUF3317) (TAIR:AT1G06515.2); Has 35333 Blast hits to 34131 proteins in 2444 species: Archae - 798; Bacteria - 22429; Metazoa - 974; Fungi - 991; Plants - 531; Viruses - 0; Other Eukaryotes - 9610 (source: NCBI BLink).	PF11779	PTHR33727	-	-	-	-
1	4873	6.61e-08	Na23	Potri.001G000300	8391	8860	+	5'	3518	1_4873	7.1798	-	Potri.001G000300	-	-	-	-	-	-	-	-	-	-	-	-	-	-	-	-	-	-	-
49	33670	6.66e-08	Cu65	Potri.T053400	29299	30477	-	3'	3193	49_33670	7.17653	-	Potri.T053400	PF13456	PTHR31696,PTHR31696:SF7	-	3.1.26.4	-	-	-	AT5G65005	-	Polynucleotidyl transferase, ribonuclease H-like superfamily protein	Polynucleotidyl transferase, ribonuclease H-like superfamily protein	-	Polynucleotidyl transferase, ribonuclease H-like superfamily protein; FUNCTIONS IN: nucleic acid binding; INVOLVED IN: biological_process unknown; LOCATED IN: cellular_component unknown; CONTAINS InterPro DOMAIN/s: Polynucleotidyl transferase, ribonuclease H fold (InterPro:IPR012337); BEST Arabidopsis thaliana protein match is: thioredoxin family protein (TAIR:AT1G52990.1); Has 414 Blast hits to …	PF13456	PTHR33033,PTHR33033:SF14	-	3.1.26.4	-	-
49	33670	6.66e-08	Cu65	Potri.T053500	36243	39528	-	5'	2573	49_33670	7.17653	-	Potri.T053500	PF03140	PTHR31170	-	-	-	-	-	AT3G60470	-	Plant protein of unknown function (DUF247)	Plant protein of unknown function (DUF247)	-	Plant protein of unknown function (DUF247); CONTAINS InterPro DOMAIN/s: Protein of unknown function DUF247, plant (InterPro:IPR004158); BEST Arabidopsis thaliana protein match is: Plant protein of unknown function (DUF247) (TAIR:AT2G28580.1); Has 1401 Blast hits to 907 proteins in 17 species: Archae - 0; Bacteria - 0; Metazoa - 0; Fungi - 0; Plants - 1401; Viruses - 0; Other Eukaryotes - 0 (sourc…	PF03140	PTHR31170	-	-	-	-
11	6383052	6.67e-08	Al27	Potri.011G068200	6369423	6373449	+	3'	9603	11_6383052	7.17587	-	Potri.011G068200	PF00860	PTHR11119,PTHR11119:SF47	-	-	K14611	GO:0055085,GO:0016020,GO:0006810,GO:0005215	-	AT2G34190	-	Xanthine/uracil permease family protein	Xanthine/uracil permease family protein	-	Xanthine/uracil permease family protein; FUNCTIONS IN: transmembrane transporter activity; INVOLVED IN: transport, transmembrane transport; LOCATED IN: membrane; EXPRESSED IN: 18 plant structures; EXPRESSED DURING: 11 growth stages; CONTAINS InterPro DOMAIN/s: Xanthine/uracil/vitamin C permease (InterPro:IPR006043); BEST Arabidopsis thaliana protein match is: Xanthine/uracil permease family prote…	PF00860	PTHR11119,PTHR11119:SF47	-	-	K14611	GO:0055085,GO:0016020,GO:0006810,GO:0005215
11	6383052	6.67e-08	Al27	Potri.011G068300	6374930	6381080	-	3'	1972	11_6383052	7.17587	-	Potri.011G068300	PF10250	PTHR31933,PTHR31933:SF2	-	-	-	-	-	AT1G29200	-	O-fucosyltransferase family protein	O-fucosyltransferase family protein	-	O-fucosyltransferase family protein; FUNCTIONS IN: molecular_function unknown; INVOLVED IN: biological_process unknown; EXPRESSED IN: 8 plant structures; EXPRESSED DURING: 4 anthesis, petal differentiation and expansion stage; CONTAINS InterPro DOMAIN/s: GDP-fucose protein O-fucosyltransferase (InterPro:IPR019378); BEST Arabidopsis thaliana protein match is: O-fucosyltransferase family protein (T…	PF10250	PTHR31933,PTHR31933:SF2	-	-	-	-
11	6383052	6.67e-08	Al27	Potri.011G068400	6385178	6385752	+	5'	2126	11_6383052	7.17587	-	Potri.011G068400	-	-	-	-	-	-	-	-	-	-	-	-	-	-	-	-	-	-	-
4	17445623	6.77e-08	Cu65	Potri.004G152400	17421330	17438179	-	3'	7444	4_17445623	7.16941	-	Potri.004G152400	PF00613,PF00454	PTHR10048,PTHR10048:SF15	-	2.7.1.67	K00888	GO:0016773,GO:0048015,GO:0046854	-	AT1G49340	ATPI4K ALPHA	Phosphatidylinositol 3- and 4-kinase family protein	Phosphatidylinositol 3- and 4-kinase family protein	Encodes a phosphatidylinositol 4-kinase that is expressed in inflorescences and shoots.	ATPI4K ALPHA; FUNCTIONS IN: 1-phosphatidylinositol 4-kinase activity, inositol or phosphatidylinositol kinase activity; INVOLVED IN: protein amino acid phosphorylation; LOCATED IN: plasma membrane; EXPRESSED IN: shoot, male gametophyte, flower, pollen tube; EXPRESSED DURING: L mature pollen stage, M germinated pollen stage; CONTAINS InterPro DOMAIN/s: Phosphoinositide 3-kinase, accessory (PIK) do…	PF00613,PF00454	PTHR10048,PTHR10048:SF15	-	2.7.1.67	K00888	GO:0016773,GO:0048015,GO:0046854
4	17445623	6.77e-08	Cu65	Potri.004G152500	17442848	17443057	-	3'	2566	4_17445623	7.16941	-	Potri.004G152500	-	PTHR34272	-	-	-	-	-	AT2G16190	-	-	-	-	BEST Arabidopsis thaliana protein match is: hydroxyproline-rich glycoprotein family protein (TAIR:AT1G49330.1); Has 77 Blast hits to 77 proteins in 25 species: Archae - 0; Bacteria - 0; Metazoa - 6; Fungi - 13; Plants - 56; Viruses - 0; Other Eukaryotes - 2 (source: NCBI BLink).	-	-	-	-	-	-
4	17445623	6.77e-08	Cu65	Potri.004G152600	17446134	17447150	-	5'	511	4_17445623	7.16941	-	Potri.004G152600	-	PTHR34272	-	-	-	-	-	AT1G49330	-	hydroxyproline-rich glycoprotein family protein	hydroxyproline-rich glycoprotein family protein	-	hydroxyproline-rich glycoprotein family protein; BEST Arabidopsis thaliana protein match is: unknown protein (TAIR:AT2G16190.1); Has 882 Blast hits to 731 proteins in 140 species: Archae - 0; Bacteria - 49; Metazoa - 218; Fungi - 71; Plants - 381; Viruses - 66; Other Eukaryotes - 97 (source: NCBI BLink).	-	PTHR34272	-	-	-	-
4	17445623	6.77e-08	Cu65	Potri.004G152700	17450768	17452288	+	5'	5145	4_17445623	7.16941	-	Potri.004G152700	-	PTHR35989,PTHR35989:SF1	-	-	-	-	-	AT1G11760	MED32	-	-	-	MED32; Has 41 Blast hits to 40 proteins in 14 species: Archae - 0; Bacteria - 0; Metazoa - 0; Fungi - 0; Plants - 41; Viruses - 0; Other Eukaryotes - 0 (source: NCBI BLink).	-	PTHR35989,PTHR35989:SF1	-	-	-	-
19	244708	6.78e-08	Al27	Potri.019G001700	237897	243288	+	3'	1420	19_244708	7.16877	-
19	244708	6.78e-08	Al27	Potri.019G001800	246065	251812	+	5'	1357	19_244708	7.16877	-	Potri.019G001800	PF08263,PF13855,PF00069	PTHR27001,PTHR27001:SF114	KOG1187	2.7.11.1,2.7.10.1	-	GO:0005515,GO:0006468,GO:0005524,GO:0004672	-	AT5G63710	-	Leucine-rich repeat protein kinase family protein	Leucine-rich repeat protein kinase family protein	-	Leucine-rich repeat protein kinase family protein; FUNCTIONS IN: protein serine/threonine kinase activity, protein kinase activity, ATP binding; INVOLVED IN: transmembrane receptor protein tyrosine kinase signaling pathway, protein amino acid phosphorylation; LOCATED IN: cellular_component unknown; EXPRESSED IN: 22 plant structures; EXPRESSED DURING: 13 growth stages; CONTAINS InterPro DOMAIN/s: …	PF08263,PF00560,PF00069	PTHR27001,PTHR27001:SF114	KOG1187	2.7.11.1,2.7.10.1	-	GO:0005515,GO:0006468,GO:0005524,GO:0004672
19	244708	6.78e-08	Al27	Potri.019G001900	252747	256223	+	5'	8039	19_244708	7.16877	-	Potri.019G001900	PF15346	PTHR31711,PTHR31711:SF2	-	-	K13173	-	-	AT5G13340	-	-	-	-	unknown protein; FUNCTIONS IN: molecular_function unknown; INVOLVED IN: biological_process unknown; LOCATED IN: chloroplast; BEST Arabidopsis thaliana protein match is: unknown protein (TAIR:AT1G10890.1); Has 1807 Blast hits to 1807 proteins in 277 species: Archae - 0; Bacteria - 0; Metazoa - 736; Fungi - 347; Plants - 385; Viruses - 0; Other Eukaryotes - 339 (source: NCBI BLink).	PF15346	PTHR31711,PTHR31711:SF2	-	-	K13173	-
3	14345325	6.86e-08	Na23	Potri.003G120900	14330717	14336093	-	3'	9232	3_14345325	7.16368	-	Potri.003G120900	PF00638	PTHR23138,PTHR23138:SF97	KOG2724	-	K14295	GO:0046907	-	AT4G11790	-	Pleckstrin homology (PH) domain superfamily protein	Pleckstrin homology (PH) domain superfamily protein	-	Pleckstrin homology (PH) domain superfamily protein; FUNCTIONS IN: molecular_function unknown; INVOLVED IN: intracellular transport; LOCATED IN: cellular_component unknown; EXPRESSED IN: 23 plant structures; EXPRESSED DURING: 13 growth stages; CONTAINS InterPro DOMAIN/s: Ran binding protein 1 (InterPro:IPR000156), Pleckstrin homology-type (InterPro:IPR011993); Has 30201 Blast hits to 17322 protei…	PF00638	PTHR23138,PTHR23138:SF97	KOG2724	-	-	GO:0046907
3	14345325	6.86e-08	Na23	Potri.003G121000	14337559	14340931	-	3'	4394	3_14345325	7.16368	-	Potri.003G121000	PF08449	PTHR10778,PTHR10778:SF19	KOG1582	-	K15277	GO:0055085	-	AT4G23010	ATUTR2	UDP-galactose transporter 2	UDP-galactose transporter 2	-	UDP-galactose transporter 2 (UTR2); FUNCTIONS IN: molecular_function unknown; INVOLVED IN: transmembrane transport; LOCATED IN: cellular_component unknown; EXPRESSED IN: 24 plant structures; EXPRESSED DURING: 14 growth stages; CONTAINS InterPro DOMAIN/s: UAA transporter (InterPro:IPR013657); BEST Arabidopsis thaliana protein match is: UDP-N-acetylglucosamine (UAA) transporter family (TAIR:AT1G126…	PF08449	PTHR10778,PTHR10778:SF19	KOG1582	-	K15277	GO:0055085
3	14345325	6.86e-08	Na23	Potri.003G121100	14347020	14349909	-	5'	1695	3_14345325	7.16368	-	Potri.003G121100	-	PTHR33623,PTHR33623:SF3	-	-	-	-	-	AT4G23020	-	-	-	-	unknown protein; FUNCTIONS IN: molecular_function unknown; INVOLVED IN: biological_process unknown; LOCATED IN: cellular_component unknown; BEST Arabidopsis thaliana protein match is: unknown protein (TAIR:AT4G11780.1).	-	PTHR33623,PTHR33623:SF3	-	-	-	-
4	17390682	7.18e-08	Cu65	Potri.004G151700	17384177	17385839	+	3'	4843	4_17390682	7.14388	-	Potri.004G151700	PF00083	PTHR23500,PTHR23500:SF109	-	-	-	GO:0055085,GO:0022857,GO:0016021	-	AT3G18830	ATPLT5	polyol/monosaccharide transporter 5	polyol/monosaccharide transporter 5	This gene encodes a plasma membrane-localized polyol/cyclitol/monosaccharide-H+-symporter. The symporter is able to catalyze the energy-dependent membrane passage of a wide range of linear polyols (three to six carbon backbone), of cyclic polyols (<i>myo</i>-inositol), and of numerous monosaccharides, including pyranose ring-forming and furanose ring-forming hexoses and pentoses. This gene belong…	polyol/monosaccharide transporter 5 (PMT5); FUNCTIONS IN: in 11 functions; INVOLVED IN: transport, transmembrane transport; LOCATED IN: plasma membrane, membrane; EXPRESSED IN: 31 plant structures; EXPRESSED DURING: 13 growth stages; CONTAINS InterPro DOMAIN/s: Sugar transporter, conserved site (InterPro:IPR005829), Major facilitator superfamily (InterPro:IPR020846), General substrate transporter…	PF00083	PTHR23500,PTHR23500:SF109	KOG0254	-	-	GO:0055085,GO:0022857,GO:0016021
4	17390682	7.18e-08	Cu65	Potri.004G151800	17385976	17386948	+	3'	3734	4_17390682	7.14388	-	Potri.004G151800	PF00067	PTHR24286,PTHR24286:SF74	-	-	-	GO:0055114,GO:0020037,GO:0016705,GO:0005506	-	AT5G05690	CBB3	Cytochrome P450 superfamily protein	Cytochrome P450 superfamily protein	Encodes a member of the CP90A family, a cytochrome P450 monooxygenase which converts 6-deoxocathasterone to 6-deoxoteasterone in the late C6 oxidation pathway and cathasterone to teasterone in the early C6 oxidation pathway of brassinolide biosynthesis. Expressed in cotyledons and leaves. Mutants display de-etiolation and derepression of light-induced genes in the dark, dwarfism, male sterility a…	CONSTITUTIVE PHOTOMORPHOGENIC DWARF (CPD); FUNCTIONS IN: electron carrier activity, monooxygenase activity, iron ion binding, oxygen binding, heme binding; INVOLVED IN: in 9 processes; EXPRESSED IN: 23 plant structures; EXPRESSED DURING: 13 growth stages; CONTAINS InterPro DOMAIN/s: Cytochrome P450 (InterPro:IPR001128), Cytochrome P450, E-class, group I (InterPro:IPR002401), Cytochrome P450, cons…	PF00067	PTHR24286,PTHR24286:SF44	KOG0157	-	-	GO:0055114,GO:0020037,GO:0016705,GO:0005506
4	17390682	7.18e-08	Cu65	Potri.004G151900	17391460	17392494	+	5'	778	4_17390682	7.14388	-	Potri.004G151900	-	-	-	-	-	-	-	AT4G36730	GBF1	G-box binding factor 1	G-box binding factor 1	member of a gene family encoding basic leucine zipper proteins (GBFs) which bind the G-box	G-box binding factor 1 (GBF1); CONTAINS InterPro DOMAIN/s: Basic-leucine zipper (bZIP) transcription factor (InterPro:IPR004827), G-box binding, MFMR (InterPro:IPR012900), bZIP transcription factor, bZIP-1 (InterPro:IPR011616); BEST Arabidopsis thaliana protein match is: basic region/leucine zipper transcription factor 16 (TAIR:AT2G35530.1); Has 3891 Blast hits to 3827 proteins in 347 species: Ar…	PF00170,PF07777	PTHR22952,PTHR22952:SF123	KOG3119	-	K09060	GO:0043565,GO:0006355,GO:0003700
4	17390682	7.18e-08	Cu65	Potri.004G152000	17394422	17397013	-	5'	3740	4_17390682	7.14388	-	Potri.004G152000	PF13041,PF01535	PTHR24015,PTHR24015:SF714	-	-	-	-	-	AT3G18840	-	Tetratricopeptide repeat (TPR)-like superfamily protein	Tetratricopeptide repeat (TPR)-like superfamily protein	-	Tetratricopeptide repeat (TPR)-like superfamily protein; CONTAINS InterPro DOMAIN/s: Pentatricopeptide repeat (InterPro:IPR002885); BEST Arabidopsis thaliana protein match is: Pentatricopeptide repeat (PPR) superfamily protein (TAIR:AT2G13600.1); Has 42936 Blast hits to 13106 proteins in 190 species: Archae - 0; Bacteria - 3; Metazoa - 51; Fungi - 30; Plants - 42456; Viruses - 0; Other Eukaryotes…	PF13041,PF01535	PTHR24015,PTHR24015:SF714	-	-	-	-
4	17390682	7.18e-08	Cu65	Potri.004G152100	17397729	17401939	-	5'	7047	4_17390682	7.14388	-	Potri.004G152100	PF00294	PTHR10584,PTHR10584:SF188	KOG2855	-	-	-	-	AT1G49350	-	pfkB-like carbohydrate kinase family protein	pfkB-like carbohydrate kinase family protein	-	pfkB-like carbohydrate kinase family protein; FUNCTIONS IN: kinase activity, ribokinase activity; INVOLVED IN: D-ribose metabolic process; LOCATED IN: cellular_component unknown; EXPRESSED IN: 22 plant structures; EXPRESSED DURING: 13 growth stages; CONTAINS InterPro DOMAIN/s: Carbohydrate/purine kinase (InterPro:IPR011611), Ribokinase (InterPro:IPR002139), Carbohydrate/puine kinase, PfkB, conser…	PF00294	PTHR10584,PTHR10584:SF188	KOG2855	2.7.1.83	-	-
1	12971	7.18e-08	Na23	Potri.001G000200	2906	6646	-	3'	6325	1_12971	7.14388	-	Potri.001G000200	PF14111	PTHR31286,PTHR31286:SF2	-	3.5.1.28,3.2.1.96	-	-	-	AT2G01050	-	zinc ion binding;nucleic acid binding	zinc ion binding;nucleic acid binding	-	zinc ion binding;nucleic acid binding; FUNCTIONS IN: zinc ion binding, nucleic acid binding; INVOLVED IN: biological_process unknown; LOCATED IN: cellular_component unknown; CONTAINS InterPro DOMAIN/s: Zinc finger, CCHC-type (InterPro:IPR001878); BEST Arabidopsis thaliana protein match is: unknown protein (TAIR:AT3G31430.1); Has 369 Blast hits to 365 proteins in 15 species: Archae - 0; Bacteria -…	PF14392,PF14111	PTHR31286,PTHR31286:SF7	-	-	-	-
1	12971	7.18e-08	Na23	Potri.001G000400	8391	12483	-	3'	488	1_12971	7.14388	-	Potri.001G000400	PF11779	PTHR33727	-	-	-	-	-	AT2G30942	-	Protein of unknown function (DUF3317)	Protein of unknown function (DUF3317)	-	Protein of unknown function (DUF3317); BEST Arabidopsis thaliana protein match is: Protein of unknown function (DUF3317) (TAIR:AT1G06515.2); Has 35333 Blast hits to 34131 proteins in 2444 species: Archae - 798; Bacteria - 22429; Metazoa - 974; Fungi - 991; Plants - 531; Viruses - 0; Other Eukaryotes - 9610 (source: NCBI BLink).	PF11779	PTHR33727	-	-	-	-
1	12971	7.18e-08	Na23	Potri.001G000300	8391	8860	+	3'	4111	1_12971	7.14388	-	Potri.001G000300	-	-	-	-	-	-	-	-	-	-	-	-	-	-	-	-	-	-	-
1	811	7.2e-08	Na23	Potri.001G000100	1660	2502	-	5'	849	1_811	7.14267	-
1	811	7.2e-08	Na23	Potri.001G000200	2906	6646	-	5'	2095	1_811	7.14267	-	Potri.001G000200	PF14111	PTHR31286,PTHR31286:SF2	-	3.5.1.28,3.2.1.96	-	-	-	AT2G01050	-	zinc ion binding;nucleic acid binding	zinc ion binding;nucleic acid binding	-	zinc ion binding;nucleic acid binding; FUNCTIONS IN: zinc ion binding, nucleic acid binding; INVOLVED IN: biological_process unknown; LOCATED IN: cellular_component unknown; CONTAINS InterPro DOMAIN/s: Zinc finger, CCHC-type (InterPro:IPR001878); BEST Arabidopsis thaliana protein match is: unknown protein (TAIR:AT3G31430.1); Has 369 Blast hits to 365 proteins in 15 species: Archae - 0; Bacteria -…	PF14392,PF14111	PTHR31286,PTHR31286:SF7	-	-	-	-
1	811	7.2e-08	Na23	Potri.001G000400	8391	12483	-	5'	7580	1_811	7.14267	-	Potri.001G000400	PF11779	PTHR33727	-	-	-	-	-	AT2G30942	-	Protein of unknown function (DUF3317)	Protein of unknown function (DUF3317)	-	Protein of unknown function (DUF3317); BEST Arabidopsis thaliana protein match is: Protein of unknown function (DUF3317) (TAIR:AT1G06515.2); Has 35333 Blast hits to 34131 proteins in 2444 species: Archae - 798; Bacteria - 22429; Metazoa - 974; Fungi - 991; Plants - 531; Viruses - 0; Other Eukaryotes - 9610 (source: NCBI BLink).	PF11779	PTHR33727	-	-	-	-
1	811	7.2e-08	Na23	Potri.001G000300	8391	8860	+	5'	7580	1_811	7.14267	-	Potri.001G000300	-	-	-	-	-	-	-	-	-	-	-	-	-	-	-	-	-	-	-
8	14406714	7.23e-08	Cu65	Potri.008G202300	14399389	14403111	+	3'	3603	8_14406714	7.14086	-	Potri.008G202300	PF12695	PTHR31591,PTHR31591:SF1	KOG4840	-	-	-	-	AT5G19050	-	alpha/beta-Hydrolases superfamily protein	alpha/beta-Hydrolases superfamily protein	-	alpha/beta-Hydrolases superfamily protein; INVOLVED IN: biological_process unknown; LOCATED IN: chloroplast; EXPRESSED IN: 18 plant structures; EXPRESSED DURING: 8 growth stages; CONTAINS InterPro DOMAIN/s: Protein of unknown function DUF1749 (InterPro:IPR013744); Has 1807 Blast hits to 1807 proteins in 277 species: Archae - 0; Bacteria - 0; Metazoa - 736; Fungi - 347; Plants - 385; Viruses - 0; …	PF12695	PTHR31591,PTHR31591:SF1	KOG4840	-	-	-
8	14406714	7.23e-08	Cu65	Potri.008G202400	14408667	14411489	+	5'	1953	8_14406714	7.14086	-	Potri.008G202400	-	PTHR35124	-	-	-	-	-	AT3G06150	-	-	-	-	unknown protein; BEST Arabidopsis thaliana protein match is: unknown protein (TAIR:AT5G19060.1); Has 61 Blast hits to 59 proteins in 10 species: Archae - 0; Bacteria - 0; Metazoa - 3; Fungi - 0; Plants - 58; Viruses - 0; Other Eukaryotes - 0 (source: NCBI BLink).	-	PTHR35124	-	-	-	-
6	21724478	7.27e-08	Al27	Potri.006G202300	21721690	21722448	+	3'	2030	6_21724478	7.13847	-	Potri.006G202300	PF00828	PTHR11721,PTHR11721:SF6	KOG1742	-	K02900	-	-	AT1G70600	-	Ribosomal protein L18e/L15 superfamily protein	Ribosomal protein L18e/L15 superfamily protein	-	Ribosomal protein L18e/L15 superfamily protein; FUNCTIONS IN: structural constituent of ribosome; INVOLVED IN: translation; LOCATED IN: cytosolic ribosome, ribosome, cytosolic large ribosomal subunit, membrane; EXPRESSED IN: guard cell, leaf; CONTAINS InterPro DOMAIN/s: Ribosomal protein L18e/L15 (InterPro:IPR021131), Ribosomal protein L15, conserved site (InterPro:IPR001196); BEST Arabidopsis th…	PF00828	PTHR11721,PTHR11721:SF6	KOG1742	-	K02900	-
6	21724478	7.27e-08	Al27	Potri.006G202400	21727027	21728029	+	5'	2549	6_21724478	7.13847	-	Potri.006G202400	-	PTHR35741,PTHR35741:SF1	-	-	-	-	-	AT4G07940	-	Protein of unknown function (DUF3245)	Protein of unknown function (DUF3245)	-	Protein of unknown function (DUF3245); CONTAINS InterPro DOMAIN/s: Protein of unknown function DUF3245 (InterPro:IPR021641); BEST Arabidopsis thaliana protein match is: Protein of unknown function (DUF3245) (TAIR:AT3G61370.1); Has 36 Blast hits to 36 proteins in 10 species: Archae - 0; Bacteria - 0; Metazoa - 0; Fungi - 0; Plants - 36; Viruses - 0; Other Eukaryotes - 0 (source: NCBI BLink).	PF11595	PTHR35741,PTHR35741:SF1	-	-	-	-
6	21724478	7.27e-08	Al27	Potri.006G202500	21732370	21733236	+	5'	7892	6_21724478	7.13847	-	Potri.006G202500	PF02701	PTHR31992	-	-	-	GO:0006355,GO:0003677	Dof	AT3G52440	-	Dof-type zinc finger DNA-binding family protein	Dof-type zinc finger DNA-binding family protein	-	Dof-type zinc finger DNA-binding family protein; CONTAINS InterPro DOMAIN/s: Zinc finger, Dof-type (InterPro:IPR003851); BEST Arabidopsis thaliana protein match is: Dof-type zinc finger DNA-binding family protein (TAIR:AT1G21340.1); Has 1099 Blast hits to 1090 proteins in 57 species: Archae - 0; Bacteria - 0; Metazoa - 2; Fungi - 0; Plants - 1092; Viruses - 0; Other Eukaryotes - 5 (source: NCBI B…	PF02701	PTHR31992,PTHR31992:SF8	-	-	-	GO:0006355,GO:0003677
17	2306790	7.35e-08	Na23	Potri.017G025000	2297910	2299534	+	3'	7256	17_2306790	7.13371	-	Potri.017G025000	PF03140	PTHR31170	-	-	-	-	-	AT2G28580	-	Plant protein of unknown function (DUF247)	Plant protein of unknown function (DUF247)	-	Plant protein of unknown function (DUF247); CONTAINS InterPro DOMAIN/s: Protein of unknown function DUF247, plant (InterPro:IPR004158); BEST Arabidopsis thaliana protein match is: Plant protein of unknown function (DUF247) (TAIR:AT2G44930.1); Has 1063 Blast hits to 972 proteins in 18 species: Archae - 0; Bacteria - 0; Metazoa - 0; Fungi - 0; Plants - 1063; Viruses - 0; Other Eukaryotes - 0 (sourc…	PF03140	PTHR31170	-	-	-	-
17	2306790	7.35e-08	Na23	Potri.017G025100	2309796	2311312	+	5'	3006	17_2306790	7.13371	-	Potri.017G025100	PF03140	PTHR31170	-	-	-	-	-	AT3G60470	-	Plant protein of unknown function (DUF247)	Plant protein of unknown function (DUF247)	-	Plant protein of unknown function (DUF247); CONTAINS InterPro DOMAIN/s: Protein of unknown function DUF247, plant (InterPro:IPR004158); BEST Arabidopsis thaliana protein match is: Plant protein of unknown function (DUF247) (TAIR:AT2G28580.1); Has 1401 Blast hits to 907 proteins in 17 species: Archae - 0; Bacteria - 0; Metazoa - 0; Fungi - 0; Plants - 1401; Viruses - 0; Other Eukaryotes - 0 (sourc…	PF03140	PTHR31170	-	-	-	-
1	33332947	7.39e-08	Cu65	Potri.001G329200	33324244	33325759	-	3'	7188	1_33332947	7.13136	-	Potri.001G329200	PF00141	PTHR31517,PTHR31517:SF7	-	1.11.1.7	K00430	GO:0055114,GO:0020037,GO:0006979,GO:0004601	-	AT5G14130	-	Peroxidase superfamily protein	Peroxidase superfamily protein	-	Peroxidase superfamily protein; FUNCTIONS IN: peroxidase activity, heme binding; INVOLVED IN: response to oxidative stress, oxidation reduction; LOCATED IN: endomembrane system; EXPRESSED IN: embryo, hypocotyl, fruit, root; EXPRESSED DURING: C globular stage; CONTAINS InterPro DOMAIN/s: Haem peroxidase (InterPro:IPR010255), Plant peroxidase (InterPro:IPR000823), Peroxidases heam-ligand binding si…	PF00141	PTHR31517,PTHR31517:SF7	-	1.11.1.7	K00430	GO:0055114,GO:0020037,GO:0006979,GO:0004601
1	33332947	7.39e-08	Cu65	Potri.001G329300	33328141	33330696	+	3'	2251	1_33332947	7.13136	-	Potri.001G329300	-	PTHR21354,PTHR21354:SF0	KOG4173	-	-	-	-	AT5G14140	-	zinc ion binding;nucleic acid binding;zinc ion binding	zinc ion binding;nucleic acid binding;zinc ion binding	-	zinc ion binding;nucleic acid binding;zinc ion binding; FUNCTIONS IN: zinc ion binding, nucleic acid binding; INVOLVED IN: biological_process unknown; LOCATED IN: intracellular; CONTAINS InterPro DOMAIN/s: Zinc finger, C2H2-like (InterPro:IPR015880), Zinc finger, C2H2-type (InterPro:IPR007087); Has 287 Blast hits to 281 proteins in 115 species: Archae - 0; Bacteria - 0; Metazoa - 116; Fungi - 82;…	-	PTHR21354,PTHR21354:SF0	KOG4173	-	-	-
1	33332947	7.39e-08	Cu65	Potri.001G329400	33331054	33332548	+	3'	399	1_33332947	7.13136	-	Potri.001G329400	PF00584	PTHR12309	KOG3498	-	K07342	GO:0016020,GO:0006886,GO:0006605	-	AT5G50460	-	secE/sec61-gamma protein transport protein	secE/sec61-gamma protein transport protein	-	secE/sec61-gamma protein transport protein; FUNCTIONS IN: P-P-bond-hydrolysis-driven protein transmembrane transporter activity; INVOLVED IN: intracellular protein transport, protein transport, protein targeting; LOCATED IN: membrane; EXPRESSED IN: 24 plant structures; EXPRESSED DURING: 15 growth stages; CONTAINS InterPro DOMAIN/s: Protein translocase SEC61 complex gamma subunit (InterPro:IPR0081…	PF00584	PTHR12309	KOG3498	-	K07342	GO:0016020,GO:0006886,GO:0006605
1	33332947	7.39e-08	Cu65	Potri.001G329500	33332999	33334865	-	5'	52	1_33332947	7.13136	-	Potri.001G329500	PF01016	PTHR15893	KOG4600	-	K02899	GO:0006412,GO:0005840,GO:0005622,GO:0003735	-	AT5G40950	RPL27	ribosomal protein large subunit 27	ribosomal protein large subunit 27	-	ribosomal protein large subunit 27 (RPL27); FUNCTIONS IN: structural constituent of ribosome; INVOLVED IN: translation; LOCATED IN: thylakoid, ribosome, chloroplast stroma, chloroplast; EXPRESSED IN: 22 plant structures; EXPRESSED DURING: 13 growth stages; CONTAINS InterPro DOMAIN/s: Ribosomal protein L27 (InterPro:IPR001684), Ribosomal protein L27, conserved site (InterPro:IPR018261); BEST Arabi…	PF01016	PTHR15893	KOG4600	-	K02899	GO:0006412,GO:0005840,GO:0005622,GO:0003735
1	33332947	7.39e-08	Cu65	Potri.001G329600	33336648	33340188	-	5'	3701	1_33332947	7.13136	-	Potri.001G329600	-	PTHR36763	-	-	-	-	-	AT3G27050	-	-	-	-	unknown protein; Has 43 Blast hits to 43 proteins in 17 species: Archae - 0; Bacteria - 0; Metazoa - 0; Fungi - 0; Plants - 40; Viruses - 0; Other Eukaryotes - 3 (source: NCBI BLink).	-	PTHR36763	-	-	-	-
19	14278894	7.43e-08	Fe57	Potri.019G114600	14266999	14269940	+	3'	8954	19_14278894	7.12901	-	Potri.019G114600	PF07725,PF05729,PF13676	PTHR11017,PTHR11017:SF174	KOG4658	-	-	GO:0007165,GO:0005515	-	AT4G12010	-	Disease resistance protein (TIR-NBS-LRR class) family	Disease resistance protein (TIR-NBS-LRR class) family	-	Disease resistance protein (TIR-NBS-LRR class) family; FUNCTIONS IN: transmembrane receptor activity, ATP binding; INVOLVED IN: signal transduction, apoptosis, defense response, innate immune response; LOCATED IN: intrinsic to membrane; EXPRESSED IN: 22 plant structures; EXPRESSED DURING: 13 growth stages; CONTAINS InterPro DOMAIN/s: NB-ARC (InterPro:IPR002182), Leucine-rich repeat (InterPro:IPR0…	PF07725,PF13676,PF13855,PF00931	PTHR11017,PTHR11017:SF169	KOG4658	-	-	GO:0007165,GO:0005515,GO:0043531
19	14278894	7.43e-08	Fe57	Potri.019G114700	14270961	14271198	+	3'	7696	19_14278894	7.12901	-	Potri.019G114700	-	-	-	-	-	-	-	-	-	-	-	-	-	-	-	-	-	-	-
19	14278894	7.43e-08	Fe57	Potri.019G114800	14277043	14280676	+	in gene	0	19_14278894	7.12901	-	Potri.019G114800	PF13676,PF00931	PTHR11017,PTHR11017:SF174	-	-	-	GO:0007165,GO:0005515,GO:0043531	-	AT4G12010	-	Disease resistance protein (TIR-NBS-LRR class) family	Disease resistance protein (TIR-NBS-LRR class) family	-	Disease resistance protein (TIR-NBS-LRR class) family; FUNCTIONS IN: transmembrane receptor activity, ATP binding; INVOLVED IN: signal transduction, apoptosis, defense response, innate immune response; LOCATED IN: intrinsic to membrane; EXPRESSED IN: 22 plant structures; EXPRESSED DURING: 13 growth stages; CONTAINS InterPro DOMAIN/s: NB-ARC (InterPro:IPR002182), Leucine-rich repeat (InterPro:IPR0…	PF07725,PF13676,PF13855,PF00931	PTHR11017,PTHR11017:SF169	KOG4658	-	-	GO:0007165,GO:0005515,GO:0043531
19	14278894	7.43e-08	Fe57	Potri.019G114900	14280949	14289204	-	5'	2055	19_14278894	7.12901	-
14	5408784	7.66e-08	Al27	Potri.014G066500	5402159	5406848	-	3'	1936	14_5408784	7.11577	-	Potri.014G066500	PF00010	PTHR12565,PTHR12565:SF173	-	-	-	GO:0046983	bHLH	AT4G00050	UNE10	basic helix-loop-helix (bHLH) DNA-binding superfamily protein	basic helix-loop-helix (bHLH) DNA-binding superfamily protein	-	unfertilized embryo sac 10 (UNE10); FUNCTIONS IN: DNA binding, sequence-specific DNA binding transcription factor activity; INVOLVED IN: double fertilization forming a zygote and endosperm, regulation of transcription; LOCATED IN: nucleus; EXPRESSED IN: 20 plant structures; EXPRESSED DURING: 13 growth stages; CONTAINS InterPro DOMAIN/s: Helix-loop-helix DNA-binding domain (InterPro:IPR001092), He…	PF00010	PTHR12565,PTHR12565:SF173	-	-	-	GO:0046983
14	5408784	7.66e-08	Al27	Potri.014G066600	5416631	5418526	+	5'	7847	14_5408784	7.11577	-	Potri.014G066600	PF04859	PTHR31161,PTHR31161:SF3	-	-	-	-	-	AT3G60680	-	Plant protein of unknown function (DUF641)	Plant protein of unknown function (DUF641)	-	Plant protein of unknown function (DUF641); CONTAINS InterPro DOMAIN/s: Protein of unknown function DUF641, plant (InterPro:IPR006943); BEST Arabidopsis thaliana protein match is: Plant protein of unknown function (DUF641) (TAIR:AT2G45260.1); Has 309 Blast hits to 304 proteins in 28 species: Archae - 0; Bacteria - 6; Metazoa - 7; Fungi - 2; Plants - 284; Viruses - 0; Other Eukaryotes - 10 (source…	PF04859	PTHR31161,PTHR31161:SF3	-	-	-	-
1	4094	7.75e-08	Na23	Potri.001G000100	1660	2502	-	3'	1592	1_4094	7.1107	-
1	4094	7.75e-08	Na23	Potri.001G000200	2906	6646	-	in gene	0	1_4094	7.1107	-	Potri.001G000200	PF14111	PTHR31286,PTHR31286:SF2	-	3.5.1.28,3.2.1.96	-	-	-	AT2G01050	-	zinc ion binding;nucleic acid binding	zinc ion binding;nucleic acid binding	-	zinc ion binding;nucleic acid binding; FUNCTIONS IN: zinc ion binding, nucleic acid binding; INVOLVED IN: biological_process unknown; LOCATED IN: cellular_component unknown; CONTAINS InterPro DOMAIN/s: Zinc finger, CCHC-type (InterPro:IPR001878); BEST Arabidopsis thaliana protein match is: unknown protein (TAIR:AT3G31430.1); Has 369 Blast hits to 365 proteins in 15 species: Archae - 0; Bacteria -…	PF14392,PF14111	PTHR31286,PTHR31286:SF7	-	-	-	-
1	4094	7.75e-08	Na23	Potri.001G000400	8391	12483	-	5'	4297	1_4094	7.1107	-	Potri.001G000400	PF11779	PTHR33727	-	-	-	-	-	AT2G30942	-	Protein of unknown function (DUF3317)	Protein of unknown function (DUF3317)	-	Protein of unknown function (DUF3317); BEST Arabidopsis thaliana protein match is: Protein of unknown function (DUF3317) (TAIR:AT1G06515.2); Has 35333 Blast hits to 34131 proteins in 2444 species: Archae - 798; Bacteria - 22429; Metazoa - 974; Fungi - 991; Plants - 531; Viruses - 0; Other Eukaryotes - 9610 (source: NCBI BLink).	PF11779	PTHR33727	-	-	-	-
1	4094	7.75e-08	Na23	Potri.001G000300	8391	8860	+	5'	4297	1_4094	7.1107	-	Potri.001G000300	-	-	-	-	-	-	-	-	-	-	-	-	-	-	-	-	-	-	-
4	16743127	8e-08	Mg25	Potri.004G143700	16735557	16742211	-	3'	916	4_16743127	7.09691	-	Potri.004G143700	PF06293	PTHR24349,PTHR24349:SF115	KOG0032	2.7.11.1	-	GO:0016773,GO:0016020,GO:0005524	-	AT3G50530	CRK	CDPK-related kinase	CDPK-related kinase	CDPK-related kinase	CDPK-related kinase (CRK); FUNCTIONS IN: in 6 functions; INVOLVED IN: protein amino acid phosphorylation, N-terminal protein myristoylation; LOCATED IN: plasma membrane; EXPRESSED IN: 24 plant structures; EXPRESSED DURING: 13 growth stages; CONTAINS InterPro DOMAIN/s: Protein kinase, ATP binding site (InterPro:IPR017441), Serine/threonine-protein kinase domain (InterPro:IPR002290), Serine/threoni…	PF00069	PTHR24349,PTHR24349:SF115	KOG0032	2.7.11.1	K00924	GO:0006468,GO:0005524,GO:0004672
4	16743127	8e-08	Mg25	Potri.004G143800	16747115	16748437	+	5'	3988	4_16743127	7.09691	-	Potri.004G143800	-	-	-	-	-	-	-	-	-	-	-	-	-	-	-	-	-	-	-
4	16743127	8e-08	Mg25	Potri.004G143900	16749403	16752724	+	5'	6276	4_16743127	7.09691	-	Potri.004G143900	PF00097	PTHR22894,PTHR22894:SF4	-	-	K15707	GO:0046872	-	AT4G33940	-	RING/U-box superfamily protein	RING/U-box superfamily protein	-	RING/U-box superfamily protein; FUNCTIONS IN: zinc ion binding; INVOLVED IN: response to chitin; EXPRESSED IN: 22 plant structures; EXPRESSED DURING: 14 growth stages; CONTAINS InterPro DOMAIN/s: Zinc finger, RING-type, conserved site (InterPro:IPR017907), Zinc finger, RING-type (InterPro:IPR001841); BEST Arabidopsis thaliana protein match is: RING/U-box protein with domain of unknown function (D…	PF00097	PTHR22894,PTHR22894:SF4	-	6.3.2.19	-	GO:0046872
5	21487841	8.04e-08	Al27	Potri.005G199000	21477087	21479236	-	3'	8605	5_21487841	7.09474	-	Potri.005G199000	PF02325	PTHR33219,PTHR33219:SF1	-	-	K02221	GO:0016020	-	AT5G36120	atylmg3	cofactor assembly, complex C (B6F)	cofactor assembly, complex C (B6F)	-	cofactor assembly, complex C (B6F) (CCB3); FUNCTIONS IN: molecular_function unknown; INVOLVED IN: cytochrome b6f complex assembly; LOCATED IN: chloroplast thylakoid membrane, chloroplast; CONTAINS InterPro DOMAIN/s: Protein of unknown function YGGT (InterPro:IPR003425); Has 30201 Blast hits to 17322 proteins in 780 species: Archae - 12; Bacteria - 1396; Metazoa - 17338; Fungi - 3422; Plants - 503…	PF02325	PTHR33219,PTHR33219:SF1	-	-	-	GO:0016020
5	21487841	8.04e-08	Al27	Potri.005G199100	21480531	21486623	-	3'	1218	5_21487841	7.09474	-	Potri.005G199100	PF00793	PTHR21057,PTHR21057:SF2	-	2.5.1.55	K01627	GO:0009058,GO:0008676,GO:0008152,GO:0005737	-	AT1G79500	AtkdsA1	Aldolase-type TIM barrel family protein	Aldolase-type TIM barrel family protein	Encodes a protein with 3-deoxy-8-phosphooctulonate synthase (KDOP synthase) activity which is involved in the biosynthesis of KDO, a component of cell wall rhamnogalacturonan II.	AtkdsA1; FUNCTIONS IN: 3-deoxy-8-phosphooctulonate synthase activity; INVOLVED IN: metabolic process, rhamnogalacturonan II biosynthetic process; LOCATED IN: endomembrane system, cytoplasm; EXPRESSED IN: 22 plant structures; EXPRESSED DURING: 13 growth stages; CONTAINS InterPro DOMAIN/s: DAHP synthetase I/KDSA (InterPro:IPR006218), Aldolase-type TIM barrel (InterPro:IPR013785), 3-deoxy-8-phosphoo…	PF00793	PTHR21057,PTHR21057:SF2	-	2.5.1.55	K01627	GO:0009058,GO:0008676,GO:0008152,GO:0005737
5	21487841	8.04e-08	Al27	Potri.005G199200	21490372	21493623	-	5'	2531	5_21487841	7.09474	-	Potri.005G199200	PF02847	PTHR12626,PTHR12626:SF2	-	-	-	-	-	AT1G22730	-	MA3 domain-containing protein	MA3 domain-containing protein	-	MA3 domain-containing protein; CONTAINS InterPro DOMAIN/s: Initiation factor eIF-4 gamma, MA3 (InterPro:IPR003891); BEST Arabidopsis thaliana protein match is: MA3 domain-containing protein (TAIR:AT5G63190.2); Has 2025 Blast hits to 776 proteins in 110 species: Archae - 0; Bacteria - 0; Metazoa - 1297; Fungi - 8; Plants - 551; Viruses - 0; Other Eukaryotes - 169 (source: NCBI BLink).	PF02847	PTHR12626,PTHR12626:SF2	-	-	-	-
5	21487841	8.04e-08	Al27	Potri.005G199300	21494021	21499397	+	5'	6180	5_21487841	7.09474	-	Potri.005G199300	PF01416	PTHR11142,PTHR11142:SF5	-	5.4.99.45,5.4.99.12,4.2.1.70	K01855	GO:0009982,GO:0009451,GO:0003723,GO:0001522	-	AT1G34150	-	Pseudouridine synthase family protein	Pseudouridine synthase family protein	-	Pseudouridine synthase family protein; FUNCTIONS IN: pseudouridine synthase activity; INVOLVED IN: pseudouridine synthesis, RNA modification; LOCATED IN: cellular_component unknown; EXPRESSED IN: 21 plant structures; EXPRESSED DURING: 14 growth stages; CONTAINS InterPro DOMAIN/s: Pseudouridine synthase, catalytic domain (InterPro:IPR020103), Pseudouridine synthase I, TruA, N-terminal (InterPro:IP…	PF01416	PTHR11142,PTHR11142:SF5	KOG2554	5.4.99.45	K01855	GO:0009982,GO:0009451,GO:0003723,GO:0001522
5	21487841	8.04e-08	Al27	Potri.005G199400	21497312	21498354	+	5'	9471	5_21487841	7.09474	-	Potri.005G199400	-	-	-	-	-	-	-	-	-	-	-	-	-	-	-	-	-	-	-
1	16600874	8.43e-08	Al27	Potri.001G187700	16594525	16596114	-	3'	4760	1_16600874	7.07417	-	Potri.001G187700	PF02298	PTHR33021,PTHR33021:SF16	-	-	-	GO:0009055	-	AT1G79800	AtENODL7	early nodulin-like protein 7	early nodulin-like protein 7	-	early nodulin-like protein 7 (ENODL7); FUNCTIONS IN: electron carrier activity, copper ion binding; LOCATED IN: anchored to membrane; EXPRESSED IN: 6 plant structures; EXPRESSED DURING: 4 anthesis, petal differentiation and expansion stage; CONTAINS InterPro DOMAIN/s: Plastocyanin-like (InterPro:IPR003245), Cupredoxin (InterPro:IPR008972); BEST Arabidopsis thaliana protein match is: early nodulin…	PF02298	PTHR33021,PTHR33021:SF16	-	-	-	GO:0009055
1	16600874	8.43e-08	Al27	Potri.001G187800	16596808	16597556	+	3'	3318	1_16600874	7.07417	-	Potri.001G187800	-	PTHR33430,PTHR33430:SF4	-	-	-	-	-	AT3G07510	-	-	-	-	unknown protein; BEST Arabidopsis thaliana protein match is: unknown protein (TAIR:AT2G01580.1); Has 133 Blast hits to 133 proteins in 14 species: Archae - 0; Bacteria - 4; Metazoa - 0; Fungi - 0; Plants - 129; Viruses - 0; Other Eukaryotes - 0 (source: NCBI BLink).	-	PTHR33430,PTHR33430:SF4	-	-	-	-
1	16600874	8.43e-08	Al27	Potri.001G187900	16596877	16597095	-	3'	3779	1_16600874	7.07417	-	Potri.001G187900	PF03552	PTHR13301,PTHR13301:SF28	-	2.4.1.12	-	GO:0030244,GO:0016760,GO:0016020	-	AT4G32410	AtCESA1	cellulose synthase 1	cellulose synthase 1	Encodes a cellulose synthase isomer. CESA1 mutants have cellulose defect in the primary cell wall. Multiple lines of evidence suggest that CESA1, along with CESA3 and CESA6 are present in the same plasma membrane complex for cellulose biosynthesis. lasma membrane complex for cellulose biosynthesis. As inferred from the null role of secondary wall-type CesAs, included in a set of five primary wall…	cellulose synthase 1 (CESA1); FUNCTIONS IN: cellulose synthase activity, transferase activity, transferring glycosyl groups; INVOLVED IN: primary cell wall biogenesis, cellulose biosynthetic process, plant-type cell wall biogenesis, hyperosmotic salinity response; LOCATED IN: Golgi apparatus, plasma membrane; EXPRESSED IN: 26 plant structures; EXPRESSED DURING: 16 growth stages; CONTAINS InterPro…	PF13632,PF14569	PTHR13301,PTHR13301:SF33	-	2.4.1.12	K10999	-
1	16600874	8.43e-08	Al27	Potri.001G188000	16607668	16610561	-	5'	6794	1_16600874	7.07417	-	Potri.001G188000	PF04535	PTHR11615,PTHR11615:SF118	-	-	-	-	-	AT3G16300	-	Uncharacterised protein family (UPF0497)	Uncharacterised protein family (UPF0497)	-	Uncharacterised protein family (UPF0497); CONTAINS InterPro DOMAIN/s: Uncharacterised protein family UPF0497, trans-membrane plant (InterPro:IPR006702), Uncharacterised protein family UPF0497, trans-membrane plant subgroup (InterPro:IPR006459); BEST Arabidopsis thaliana protein match is: Uncharacterised protein family (UPF0497) (TAIR:AT1G79780.1); Has 429 Blast hits to 429 proteins in 20 species:…	PF04535	PTHR11615,PTHR11615:SF118	-	-	-	-
252	40813	8.67e-08	Cu65	Potri.T131400	35806	36561	-	3'	4252	252_40813	7.06198	-	Potri.T131400	PF00188	PTHR10334,PTHR10334:SF223	KOG3017	-	K13449	-	-	AT2G14610	ATPR1	pathogenesis-related gene 1	pathogenesis-related gene 1	PR1 gene expression is induced in response to a variety of pathogens. It is a useful molecular marker for the SAR response. Though the Genbank record for the cDNA associated to this gene is called 'PR-1-like', the sequence actually corresponds to PR1. Expression of this gene is salicylic-acid responsive.	pathogenesis-related gene 1 (PR1); FUNCTIONS IN: molecular_function unknown; INVOLVED IN: response to vitamin B1, response to jasmonic acid stimulus, systemic acquired resistance, defense response; LOCATED IN: extracellular region, cell wall; EXPRESSED IN: 17 plant structures; EXPRESSED DURING: 9 growth stages; CONTAINS InterPro DOMAIN/s: Allergen V5/Tpx-1 related, conserved site (InterPro:IPR018…	PF00188	PTHR10334,PTHR10334:SF223	KOG3017	-	K13449	-
2	10061422	8.7e-08	Na23	Potri.002G135100	10048665	10059889	-	3'	1533	2_10061422	7.06048	-	Potri.002G135100	PF02212,PF00350,PF01031	PTHR11566,PTHR11566:SF77	-	-	-	GO:0005525,GO:0003924	-	AT3G60190	ADL1E	DYNAMIN-like 1E	DYNAMIN-like 1E	At3g60190 encodes Arabidopsis dynamin-related protein 1E, DRP1E, also known as EDR3, ADL4 and ADL1E, which is 624 amino acid residues long, has a predicted mass of 69.8 kDa and a pI of 7.5. Dynamin-related protein 1E belongs to a plant-specific subclass of dynamin-related proteins (DRP1), consisting of five members in Arabidopsis (A, B, C, D, E). This class is characterized by having an N-termina…	DYNAMIN-like 1E (DL1E); FUNCTIONS IN: GTP binding, GTPase activity; INVOLVED IN: response to cadmium ion, vesicle-mediated transport, defense response to fungus; LOCATED IN: mitochondrion, plasma membrane, vacuole; EXPRESSED IN: 24 plant structures; EXPRESSED DURING: 13 growth stages; CONTAINS InterPro DOMAIN/s: Dynamin GTPase effector (InterPro:IPR003130), Dynamin, GTPase domain (InterPro:IPR001…	PF02212,PF00350,PF01031	PTHR11566,PTHR11566:SF80	-	-	-	GO:0005525,GO:0003924
2	10061422	8.7e-08	Na23	Potri.002G135200	10062375	10062792	-	5'	953	2_10061422	7.06048	-	Potri.002G135200	-	-	-	-	-	-	-	-	-	-	-	-	-	-	-	-	-	-	-
2	10061422	8.7e-08	Na23	Potri.002G135300	10062847	10071489	-	5'	1425	2_10061422	7.06048	-	Potri.002G135300	PF00390,PF03949	PTHR23406,PTHR23406:SF2	-	1.1.1.39	K00028	GO:0055114,GO:0004471,GO:0051287	-	AT2G13560	NAD-ME1	NAD-dependent malic enzyme 1	NAD-dependent malic enzyme 1	Encodes an NAD-dependent malic enzyme (NAD-ME) that does not act on oxaloacetate, indicating that it belongs to EC 1.1.1.39. It is a member of the alpha family of NAD-MEs in plants. It appears to function as a homodimer or as a heterodimer with the beta-type NAD-ME2 (At4g00570). NAD-ME1 transcript and protein levels are higher during the night than during the day.	NAD-dependent malic enzyme 1 (NAD-ME1); FUNCTIONS IN: in 7 functions; INVOLVED IN: response to salt stress, malate metabolic process; LOCATED IN: mitochondrion, chloroplast; EXPRESSED IN: 23 plant structures; EXPRESSED DURING: 13 growth stages; CONTAINS InterPro DOMAIN/s: Malic enzyme, NAD-binding (InterPro:IPR012302), Malic oxidoreductase (InterPro:IPR001891), Malic enzyme, conserved site (Inter…	PF00390,PF03949	PTHR23406,PTHR23406:SF2	-	1.1.1.39	K00028	GO:0055114,GO:0004471,GO:0051287
1	36481681	8.73e-08	Al27	Potri.001G356500	36477323	36482607	+	in gene	0	1_36481681	7.05899	-	Potri.001G356500	PF03999	PTHR19321,PTHR19321:SF11	-	-	K16732	GO:0008017,GO:0000910,GO:0000226	-	AT5G55230	ATMAP65-1	microtubule-associated proteins 65-1	microtubule-associated proteins 65-1	Binds and bundles microtubules. Plays a role in stabilizing anti-parallel microtubules in the central spindle at anaphase to early cytokinesis but is not essential at the midline of the phragmoplast at later stages. The timing with which the MAP65-1 was targeted to the spindle appears to be regulated by a phosphorylation sensitive switch. Enhances microtubule polymerization, promotes nucleation a…	microtubule-associated proteins 65-1 (MAP65-1); FUNCTIONS IN: microtubule binding; INVOLVED IN: in 6 processes; LOCATED IN: in 7 components; EXPRESSED IN: 23 plant structures; EXPRESSED DURING: 13 growth stages; CONTAINS InterPro DOMAIN/s: Microtubule-associated protein, MAP65/ASE1-type (InterPro:IPR007145); BEST Arabidopsis thaliana protein match is: microtubule-associated protein 65-2 (TAIR:AT4…	PF03999	PTHR19321,PTHR19321:SF11	-	-	K16732	GO:0008017,GO:0000910,GO:0000226
18	1749602	8.86e-08	Cu65	Potri.018G021900	1743742	1745095	-	3'	4507	18_1749602	7.05257	-	Potri.018G021900	PF00847	PTHR31194,PTHR31194:SF4	-	-	-	GO:0006355,GO:0003700	ERF	AT5G25190	-	Integrase-type DNA-binding superfamily protein	Integrase-type DNA-binding superfamily protein	encodes a member of the ERF (ethylene response factor) subfamily B-6 of ERF/AP2 transcription factor family. The protein contains one AP2 domain. There are 12 members in this subfamily including RAP2.11.	Integrase-type DNA-binding superfamily protein; CONTAINS InterPro DOMAIN/s: DNA-binding, integrase-type (InterPro:IPR016177), Pathogenesis-related transcriptional factor/ERF, DNA-binding (InterPro:IPR001471); BEST Arabidopsis thaliana protein match is: Integrase-type DNA-binding superfamily protein (TAIR:AT1G15360.1); Has 1807 Blast hits to 1807 proteins in 277 species: Archae - 0; Bacteria - 0; …	PF00847	PTHR31194,PTHR31194:SF4	-	-	-	GO:0006355,GO:0003700
18	1749602	8.86e-08	Cu65	Potri.018G022000	1753952	1756510	+	5'	4350	18_1749602	7.05257	-	Potri.018G022000	PF01040	PTHR11048,PTHR11048:SF25	-	2.5.1.116	K09833	GO:0016021,GO:0004659	-	AT2G18950	ATHPT	homogentisate phytyltransferase 1	homogentisate phytyltransferase 1	Encodes homogentisate phytyltransferase involved in tocopherol biosynthesis. Has impact on seed longevity and plays a role in the adaptation to low temperature stress, notably phloem loading.	homogentisate phytyltransferase 1 (HPT1); CONTAINS InterPro DOMAIN/s: UbiA prenyltransferase (InterPro:IPR000537); BEST Arabidopsis thaliana protein match is: homogentisate prenyltransferase (TAIR:AT3G11945.1); Has 1047 Blast hits to 1044 proteins in 315 species: Archae - 194; Bacteria - 477; Metazoa - 7; Fungi - 6; Plants - 190; Viruses - 0; Other Eukaryotes - 173 (source: NCBI BLink).	PF01040	PTHR11048,PTHR11048:SF26	-	2.5.1.115	K09833	GO:0016021,GO:0004659
18	1749602	8.86e-08	Cu65	Potri.018G022100	1758432	1759316	+	5'	8830	18_1749602	7.05257	-	Potri.018G022100	PF00832	PTHR19970	KOG0002	-	K02924	GO:0006412,GO:0005840,GO:0005622,GO:0003735	-	AT4G31985	-	Ribosomal protein L39 family protein	Ribosomal protein L39 family protein	-	Ribosomal protein L39 family protein; FUNCTIONS IN: structural constituent of ribosome; INVOLVED IN: translation; LOCATED IN: ribosome, cytosolic large ribosomal subunit; EXPRESSED IN: 23 plant structures; EXPRESSED DURING: 13 growth stages; CONTAINS InterPro DOMAIN/s: Ribosomal protein L39e, conserved site (InterPro:IPR020083), Ribosomal protein L39e (InterPro:IPR000077); BEST Arabidopsis thalia…	PF00832	PTHR19970,PTHR19970:SF4	KOG0002	-	K02924	GO:0006412,GO:0005840,GO:0005622,GO:0003735
2	12492957	9.09e-08	Al27	Potri.002G165500	12477820	12487550	-	3'	5407	2_12492957	7.04144	-	Potri.002G165500	-	PTHR18921	-	-	-	-	-	AT2G46180	GC4	golgin candidate 4	golgin candidate 4	This gene is predicted to encode a protein that functions as a Golgi apparatus structural component known as a golgin in mammals and yeast. A fluorescently-tagged version of GC4 co-localizes with Golgi markers, and this localization appears to be replicated using the C-terminal (169 aa) portion of the protein.	golgin candidate 4 (GC4); BEST Arabidopsis thaliana protein match is: GRIP-related ARF-binding domain-containing protein 1 (TAIR:AT3G61570.1); Has 144775 Blast hits to 78736 proteins in 3164 species: Archae - 1753; Bacteria - 23936; Metazoa - 62600; Fungi - 12453; Plants - 7734; Viruses - 519; Other Eukaryotes - 35780 (source: NCBI BLink).	-	PTHR18921	-	-	-	-
2	12492957	9.09e-08	Al27	Potri.002G165600	12489437	12490817	-	3'	2140	2_12492957	7.04144	-	Potri.002G165600	-	-	-	-	-	-	-	-	-	-	-	-	-	-	-	-	-	-	-
2	12492957	9.09e-08	Al27	Potri.002G165700	12493553	12494527	+	5'	596	2_12492957	7.04144	-	Potri.002G165700	PF00704	PTHR11177,PTHR11177:SF175	-	3.2.1.14,3.2.1.17	K01183	GO:0005975,GO:0004553	-	AT5G24090	ATCHIA	chitinase A	chitinase A	Chitinase A (class III) expressed exclusively under environmental stress conditions.	chitinase A (CHIA); FUNCTIONS IN: cation binding, hydrolase activity, hydrolyzing O-glycosyl compounds, catalytic activity; INVOLVED IN: response to salt stress, response to cold, cellular response to water deprivation, response to wounding, response to light intensity; LOCATED IN: endomembrane system; EXPRESSED IN: 20 plant structures; EXPRESSED DURING: 13 growth stages; CONTAINS InterPro DOMAIN…	PF00704	PTHR11177	-	3.2.1.14,3.2.1.17	K01183	GO:0005975,GO:0004553
4	8726825	9.11e-08	Al27	Potri.004G100400	8715855	8719005	-	3'	7820	4_8726825	7.04048	-	Potri.004G100400	PF00067	PTHR24282,PTHR24282:SF12	KOG0157	-	K10717	GO:0055114,GO:0020037,GO:0016705,GO:0005506	-	AT5G38450	CYP735A1	cytochrome P450, family 735, subfamily A, polypeptide 1	cytochrome P450, family 735, subfamily A, polypeptide 1	member of CYP735A	cytochrome P450, family 735, subfamily A, polypeptide 1 (CYP735A1); FUNCTIONS IN: electron carrier activity, monooxygenase activity, iron ion binding, oxygen binding, heme binding; INVOLVED IN: oxidation reduction; LOCATED IN: endomembrane system; EXPRESSED IN: male gametophyte, root, pollen tube; EXPRESSED DURING: M germinated pollen stage; CONTAINS InterPro DOMAIN/s: Cytochrome P450 (InterPro:I…	PF00067	PTHR24282,PTHR24282:SF12	KOG0157	-	K10717	GO:0055114,GO:0020037,GO:0016705,GO:0005506
4	8726825	9.11e-08	Al27	Potri.004G100500	8731067	8736092	-	5'	4242	4_8726825	7.04048	-	Potri.004G100500	PF03155	PTHR12413,PTHR12413:SF1	-	2.4.1.267	K03848	GO:0016758,GO:0005789	-	AT5G38460	-	ALG6, ALG8 glycosyltransferase family	ALG6, ALG8 glycosyltransferase family	-	ALG6, ALG8 glycosyltransferase family; FUNCTIONS IN: transferase activity, transferring hexosyl groups, transferase activity, transferring glycosyl groups; LOCATED IN: endoplasmic reticulum membrane; EXPRESSED IN: 20 plant structures; EXPRESSED DURING: 10 growth stages; CONTAINS InterPro DOMAIN/s: Glycosyltransferase, ALG6/ALG8 (InterPro:IPR004856); BEST Arabidopsis thaliana protein match is: ALG…	PF03155	PTHR12413,PTHR12413:SF1	-	2.4.1.267	K03848	GO:0016758,GO:0005789
4	8726825	9.11e-08	Al27	Potri.004G100600	8733526	8734021	+	5'	6701	4_8726825	7.04048	-	Potri.004G100600	-	-	-	-	-	-	-	-	-	-	-	-	-	-	-	-	-	-	-
2	13363247	9.19e-08	Na23	Potri.002G174900	13363305	13364065	+	5'	58	2_13363247	7.03668	-	Potri.002G174900	PF13833	PTHR10891,PTHR10891:SF624	KOG0028	-	-	-	-	AT2G46600	-	Calcium-binding EF-hand family protein	Calcium-binding EF-hand family protein	-	Calcium-binding EF-hand family protein; FUNCTIONS IN: calcium ion binding; LOCATED IN: cellular_component unknown; EXPRESSED IN: 24 plant structures; EXPRESSED DURING: 14 growth stages; CONTAINS InterPro DOMAIN/s: EF-Hand 1, calcium-binding site (InterPro:IPR018247), EF-HAND 2 (InterPro:IPR018249), EF-hand-like domain (InterPro:IPR011992); BEST Arabidopsis thaliana protein match is: pinoid-bindin…	PF13833	PTHR10891,PTHR10891:SF624	KOG0028	-	-	-
2	13363247	9.19e-08	Na23	Potri.002G175000	13368848	13371705	-	5'	5601	2_13363247	7.03668	-	Potri.002G175000	PF00076	PTHR24012	KOG0106	-	K12893	GO:0003676	-	AT3G61860	ATRSP31	RNA-binding (RRM/RBD/RNP motifs) family protein	RNA-binding (RRM/RBD/RNP motifs) family protein	encodes an arginine/serine-rich splicing factor. transcript is alternatively spliced and is differentially expressed in different tissues (flowers, roots, stems, and leaves) examined. Barta et al (2010) have proposed a nomenclature for Serine/Arginine-Rich Protein Splicing Factors (SR proteins): Plant Cell. 2010, 22:2926.	RSP31; FUNCTIONS IN: RNA binding, nucleotide binding, nucleic acid binding; INVOLVED IN: nuclear mRNA splicing, via spliceosome, RNA splicing; LOCATED IN: nuclear speck, spliceosomal complex; EXPRESSED IN: 25 plant structures; EXPRESSED DURING: 14 growth stages; CONTAINS InterPro DOMAIN/s: RNA recognition motif, RNP-1 (InterPro:IPR000504), Nucleotide-binding, alpha-beta plait (InterPro:IPR012677)…	PF00076	PTHR24012	KOG0106	-	K12893	GO:0003676
16	14024459	9.28e-08	Mo98	Potri.016G137400	14015822	14017597	+	3'	6862	16_14024459	7.03245	-	Potri.016G137400	PF00067	PTHR24298,PTHR24298:SF86	KOG0156	1.14.13.120	-	GO:0055114,GO:0020037,GO:0016705,GO:0005506	-	AT3G26320	CYP71B36	cytochrome P450, family 71, subfamily B, polypeptide 36	cytochrome P450, family 71, subfamily B, polypeptide 36	putative cytochrome P450	cytochrome P450, family 71, subfamily B, polypeptide 36 (CYP71B36); FUNCTIONS IN: electron carrier activity, monooxygenase activity, iron ion binding, oxygen binding, heme binding; INVOLVED IN: oxidation reduction; LOCATED IN: cellular_component unknown; EXPRESSED IN: 8 plant structures; EXPRESSED DURING: LP.06 six leaves visible, LP.04 four leaves visible, LP.10 ten leaves visible, LP.02 two lea…	PF00067	PTHR24298,PTHR24298:SF85	-	1.14.13.68	K00517	GO:0055114,GO:0020037,GO:0016705,GO:0005506
16	14024459	9.28e-08	Mo98	Potri.016G137500	14020886	14021244	-	3'	3215	16_14024459	7.03245	-	Potri.016G137500	-	-	-	-	-	-	-	AT2G30290	BP80-1;2	VACUOLAR SORTING RECEPTOR 2	VACUOLAR SORTING RECEPTOR 2	-	VACUOLAR SORTING RECEPTOR 2 (VSR2); FUNCTIONS IN: calcium ion binding; INVOLVED IN: protein targeting to vacuole; LOCATED IN: integral to plasma membrane, Golgi transport complex; EXPRESSED IN: petal, leaf whorl, male gametophyte, flower, pollen tube; EXPRESSED DURING: L mature pollen stage, M germinated pollen stage, 4 anthesis, petal differentiation and expansion stage; CONTAINS InterPro DOMAIN…	PF02225	PTHR22765,PTHR22765:SF58	KOG3920	-	-	-
16	14024459	9.28e-08	Mo98	Potri.016G137600	14026092	14027869	+	5'	1633	16_14024459	7.03245	-	Potri.016G137600	PF00067	PTHR24298,PTHR24298:SF86	KOG0156	1.14.13.120	-	GO:0055114,GO:0020037,GO:0016705,GO:0005506	-	AT3G48280	CYP71A25	cytochrome P450, family 71, subfamily A, polypeptide 25	cytochrome P450, family 71, subfamily A, polypeptide 25	putative cytochrome P450	cytochrome P450, family 71, subfamily A, polypeptide 25 (CYP71A25); FUNCTIONS IN: electron carrier activity, monooxygenase activity, iron ion binding, oxygen binding, heme binding; INVOLVED IN: oxidation reduction; CONTAINS InterPro DOMAIN/s: Cytochrome P450 (InterPro:IPR001128), Cytochrome P450, conserved site (InterPro:IPR017972), Cytochrome P450, E-class, group I (InterPro:IPR002401); BEST Ara…	PF00067	PTHR24298,PTHR24298:SF182	-	4.99.1.6	-	GO:0055114,GO:0020037,GO:0016705,GO:0005506
16	14024459	9.28e-08	Mo98	Potri.016G137700	14028706	14032709	-	5'	4247	16_14024459	7.03245	-	Potri.016G137700	PF06814	PTHR21229,PTHR21229:SF1	-	-	-	GO:0016021	-	AT1G61670	-	Lung seven transmembrane receptor family protein	Lung seven transmembrane receptor family protein	-	Lung seven transmembrane receptor family protein; FUNCTIONS IN: molecular_function unknown; LOCATED IN: endomembrane system, integral to membrane; CONTAINS InterPro DOMAIN/s: Transmembrane receptor, eukaryota (InterPro:IPR009637); BEST Arabidopsis thaliana protein match is: Lung seven transmembrane receptor family protein (TAIR:AT1G10980.1); Has 653 Blast hits to 651 proteins in 175 species: Arch…	PF06814	PTHR21229,PTHR21229:SF1	-	-	-	GO:0016021
10	3490369	9.65e-08	Na23	Potri.010G024500	3485943	3486627	+	3'	3742	10_3490369	7.01547	-	Potri.010G024500	-	PTHR33433	-	-	-	-	-	AT5G24860	ATFPF1	flowering promoting factor 1	flowering promoting factor 1	encodes a small protein of 12.6 kDa that regulates flowering and is involved in gibberellin signalling pathway. It is expressed in apical meristems immediately after the photoperiodic induction of flowering. Genetic interactions with flowering time and floral organ identity genes suggest that this gene may be involved in modulating the competence to flower. There are two other genes similar to FP…	FLOWERING PROMOTING FACTOR 1 (FPF1); FUNCTIONS IN: molecular_function unknown; INVOLVED IN: response to gibberellin stimulus, positive regulation of flower development; LOCATED IN: cellular_component unknown; EXPRESSED IN: 15 plant structures; EXPRESSED DURING: 4 anthesis, F mature embryo stage, petal differentiation and expansion stage, E expanded cotyledon stage, D bilateral stage; BEST Arabido…	-	PTHR33433,PTHR33433:SF3	-	-	-	-
8	5879505	9.92e-08	As75	Potri.008G093900	5869427	5873111	+	3'	6394	8_5879505	7.00349	-
8	5879505	9.92e-08	As75	Potri.008G094000	5884501	5889490	+	5'	4996	8_5879505	7.00349	-	Potri.008G094000	PF03106	PTHR31221,PTHR31221:SF8	-	-	-	GO:0043565,GO:0006355,GO:0003700	WRKY	AT1G69310	ATWRKY57	WRKY DNA-binding protein 57	WRKY DNA-binding protein 57	Encodes WRKY57, a member of the WRKY Transcription Factor. Activation of WRKY57 confers drought tolerance.	WRKY DNA-binding protein 57 (WRKY57); CONTAINS InterPro DOMAIN/s: DNA-binding WRKY (InterPro:IPR003657); BEST Arabidopsis thaliana protein match is: WRKY DNA-binding protein 48 (TAIR:AT5G49520.1); Has 35333 Blast hits to 34131 proteins in 2444 species: Archae - 798; Bacteria - 22429; Metazoa - 974; Fungi - 991; Plants - 531; Viruses - 0; Other Eukaryotes - 9610 (source: NCBI BLink).	PF03106	PTHR31221,PTHR31221:SF8	-	-	-	GO:0043565,GO:0006355,GO:0003700
867	3219	1.02e-07	Al27	Potri.T165800	1506	2548	-	3'	671	867_3219	6.9914	-	Potri.T165800	-	-	-	-	-	-	-	-	-	-	-	-	-	-	-	-	-	-	-
14	2120987	1.05e-07	As75	Potri.014G024700	2104344	2115666	-	3'	5321	14_2120987	6.97881	-	Potri.014G024700	PF00225	PTHR24115,PTHR24115:SF463	-	3.6.4.4	K10395	GO:0008017,GO:0007018,GO:0005524,GO:0003777,GO:0005871	-	AT5G47820	FRA1	P-loop containing nucleoside triphosphate hydrolases superfamily protein	P-loop containing nucleoside triphosphate hydrolases superfamily protein	encodes a kinesin-like protein with an N-terminal microtubule binding motor domain. Protein is localized to the periphery of the cytoplasm and mutants in the gene exhibit altered orientation of cellulose microfibrils and reduced mechanical strength of fibers.	FRAGILE FIBER 1 (FRA1); CONTAINS InterPro DOMAIN/s: Kinesin, motor region, conserved site (InterPro:IPR019821), Kinesin, motor domain (InterPro:IPR001752); BEST Arabidopsis thaliana protein match is: ATP binding microtubule motor family protein (TAIR:AT3G50240.1); Has 30201 Blast hits to 17322 proteins in 780 species: Archae - 12; Bacteria - 1396; Metazoa - 17338; Fungi - 3422; Plants - 5037; Vir…	PF00225	PTHR24115,PTHR24115:SF463	-	3.6.4.4	K10395	GO:0008017,GO:0007018,GO:0005524,GO:0003777,GO:0005871
14	2120987	1.05e-07	As75	Potri.014G024800	2122649	2129664	+	5'	1662	14_2120987	6.97881	-
14	2120987	1.05e-07	As75	Potri.014G024900	2125557	2126422	-	5'	4570	14_2120987	6.97881	-	Potri.014G024900	-	PTHR11926,PTHR11926:SF384	-	2.4.1.128	-	GO:0016758,GO:0008152	-	AT4G34135	UGT73B2	UDP-glucosyltransferase 73B2	UDP-glucosyltransferase 73B2	The At4g34135 gene encodes a flavonol 7-O-glucosyltransferase (EC 2.4.1.237) that glucosylates also with a 20 fold lower activity flavonols (kaempferol and quercetin) at the 3-O-position.	UDP-glucosyltransferase 73B2 (UGT73B2); FUNCTIONS IN: flavonol 3-O-glucosyltransferase activity, UDP-glycosyltransferase activity, quercetin 7-O-glucosyltransferase activity, UDP-glucosyltransferase activity; INVOLVED IN: flavonol biosynthetic process, response to other organism; LOCATED IN: endomembrane system; EXPRESSED IN: male gametophyte, pollen tube; EXPRESSED DURING: M germinated pollen st…	PF00201	PTHR11926,PTHR11926:SF152	-	-	-	GO:0016758,GO:0008152
112	114257	1.06e-07	Al27	Potri.T090800	111977	112942	+	3'	1315	112_114257	6.97469	-	Potri.T090800	PF01657	PTHR32099,PTHR32099:SF1	-	-	-	-	-	AT4G05200	CRK25	cysteine-rich RLK (RECEPTOR-like protein kinase) 25	cysteine-rich RLK (RECEPTOR-like protein kinase) 25	Encodes a cysteine-rich receptor-like protein kinase.	cysteine-rich RLK (RECEPTOR-like protein kinase) 25 (CRK25); FUNCTIONS IN: kinase activity; INVOLVED IN: protein amino acid phosphorylation; LOCATED IN: endomembrane system; EXPRESSED IN: root; CONTAINS InterPro DOMAIN/s: Protein kinase, ATP binding site (InterPro:IPR017441), Protein kinase, catalytic domain (InterPro:IPR000719), Protein of unknown function DUF26 (InterPro:IPR002902), Serine-thre…	PF01657,PF07714	PTHR27002	KOG1187	2.7.11.1	-	GO:0006468,GO:0004672
112	114258	1.06e-07	Al27	Potri.T090800	111977	112942	+	3'	1316	112_114258	6.97469	-	Potri.T090800	PF01657	PTHR32099,PTHR32099:SF1	-	-	-	-	-	AT4G05200	CRK25	cysteine-rich RLK (RECEPTOR-like protein kinase) 25	cysteine-rich RLK (RECEPTOR-like protein kinase) 25	Encodes a cysteine-rich receptor-like protein kinase.	cysteine-rich RLK (RECEPTOR-like protein kinase) 25 (CRK25); FUNCTIONS IN: kinase activity; INVOLVED IN: protein amino acid phosphorylation; LOCATED IN: endomembrane system; EXPRESSED IN: root; CONTAINS InterPro DOMAIN/s: Protein kinase, ATP binding site (InterPro:IPR017441), Protein kinase, catalytic domain (InterPro:IPR000719), Protein of unknown function DUF26 (InterPro:IPR002902), Serine-thre…	PF01657,PF07714	PTHR27002	KOG1187	2.7.11.1	-	GO:0006468,GO:0004672
10	20089643	1.06e-07	Al27	Potri.010G212600	20081781	20083425	+	3'	6218	10_20089643	6.97469	-	Potri.010G212600	PF08541,PF08392	PTHR31561,PTHR31561:SF24	-	2.3.1.199	K15397	GO:0016747,GO:0008610,GO:0016020,GO:0006633	-	AT5G04530	KCS19	3-ketoacyl-CoA synthase 19	3-ketoacyl-CoA synthase 19	Encodes KCS19, a member of the 3-ketoacyl-CoA synthase family involved in the biosynthesis of VLCFA (very long chain fatty acids).	3-ketoacyl-CoA synthase 19 (KCS19); FUNCTIONS IN: transferase activity, transferring acyl groups other than amino-acyl groups, catalytic activity, acyltransferase activity; INVOLVED IN: response to cold, response to light stimulus, response to osmotic stress; LOCATED IN: endomembrane system, membrane; EXPRESSED IN: 17 plant structures; EXPRESSED DURING: 12 growth stages; CONTAINS InterPro DOMAIN/…	PF08541,PF08392	PTHR31561,PTHR31561:SF24	-	2.3.1.199	K15397	GO:0016747,GO:0008610,GO:0016020,GO:0006633
10	20089643	1.06e-07	Al27	Potri.010G212700	20092476	20097061	+	5'	2833	10_20089643	6.97469	-	Potri.010G212700	PF13962,PF13637,PF12796	PTHR24177,PTHR24177:SF10	KOG0502,KOG4412,KOG0508	-	-	-	-	AT3G12360	ITN1	Ankyrin repeat family protein	Ankyrin repeat family protein	Encodes a protein with an ankyrin motif and transmembrane domains that is involved in salt tolerance. Expressed throughout the plant and localized to the plasma membrane. Loss of function mutations show an increased tolerance to salt based on assaying seedling growth in the presence of salt. In the mutants, induction of genes required for production of reactive oxygen species is reduced suggestin…	INCREASED TOLERANCE TO NACL (ITN1); INVOLVED IN: response to salt stress; LOCATED IN: plasma membrane; EXPRESSED IN: 24 plant structures; EXPRESSED DURING: 13 growth stages; CONTAINS InterPro DOMAIN/s: Ankyrin repeat-containing domain (InterPro:IPR020683), Ankyrin repeat (InterPro:IPR002110); BEST Arabidopsis thaliana protein match is: Ankyrin repeat family protein (TAIR:AT3G09550.1); Has 61607 B…	PF13962,PF13637,PF12796	PTHR24177,PTHR24177:SF10	KOG0502,KOG4412,KOG0508	-	-	-
1	47395383	1.07e-07	Na23	Potri.001G442700	47398825	47400525	+	5'	3442	1_47395383	6.97062	-	Potri.001G442700	PF01055	PTHR22762,PTHR22762:SF82	-	3.2.1.20	-	GO:0005975,GO:0004553	-	AT5G11720	-	Glycosyl hydrolases family 31 protein	Glycosyl hydrolases family 31 protein	-	Glycosyl hydrolases family 31 protein; FUNCTIONS IN: hydrolase activity, hydrolyzing O-glycosyl compounds; INVOLVED IN: carbohydrate metabolic process; LOCATED IN: apoplast, vacuole, plant-type cell wall; EXPRESSED IN: 23 plant structures; EXPRESSED DURING: 13 growth stages; CONTAINS InterPro DOMAIN/s: Glycoside hydrolase, family 31 (InterPro:IPR000322), Glycoside hydrolase, catalytic core (Inter…	PF13802,PF16863,PF01055	PTHR22762,PTHR22762:SF82	-	3.2.1.20	K01187	GO:0005975,GO:0004553
1	47395383	1.07e-07	Na23	Potri.001G442800	47402305	47406214	+	5'	6922	1_47395383	6.97062	-	Potri.001G442800	PF13802,PF16863,PF01055	PTHR22762,PTHR22762:SF82	-	3.2.1.20	K01187	GO:0005975,GO:0004553	-	AT5G11720	-	Glycosyl hydrolases family 31 protein	Glycosyl hydrolases family 31 protein	-	Glycosyl hydrolases family 31 protein; FUNCTIONS IN: hydrolase activity, hydrolyzing O-glycosyl compounds; INVOLVED IN: carbohydrate metabolic process; LOCATED IN: apoplast, vacuole, plant-type cell wall; EXPRESSED IN: 23 plant structures; EXPRESSED DURING: 13 growth stages; CONTAINS InterPro DOMAIN/s: Glycoside hydrolase, family 31 (InterPro:IPR000322), Glycoside hydrolase, catalytic core (Inter…	PF13802,PF16863,PF01055	PTHR22762,PTHR22762:SF82	-	3.2.1.20	K01187	GO:0005975,GO:0004553
17	2344570	1.09e-07	Na23	Potri.017G025300	2344447	2345321	-	in gene	0	17_2344570	6.96257	-	Potri.017G025300	PF03999	PTHR19321,PTHR19321:SF4	-	-	-	GO:0008017,GO:0000910,GO:0000226	-	AT2G38720	MAP65-5	microtubule-associated protein 65-5	microtubule-associated protein 65-5	-	microtubule-associated protein 65-5 (MAP65-5); CONTAINS InterPro DOMAIN/s: Microtubule-associated protein, MAP65/ASE1-type (InterPro:IPR007145); BEST Arabidopsis thaliana protein match is: microtubule-associated protein 65-2 (TAIR:AT4G26760.1); Has 9645 Blast hits to 7381 proteins in 767 species: Archae - 226; Bacteria - 1139; Metazoa - 4615; Fungi - 969; Plants - 706; Viruses - 30; Other Eukaryo…	PF03999	PTHR19321,PTHR19321:SF4	-	-	K16732	GO:0008017,GO:0000910,GO:0000226
17	2344570	1.09e-07	Na23	Potri.017G025400	2353070	2353586	+	5'	8500	17_2344570	6.96257	-	Potri.017G025400	-	-	-	-	-	-	-	-	-	-	-	-	-	-	-	-	-	-	-
8	8560043	1.11e-07	Cu65	Potri.008G130200	8539584	8554404	+	3'	5639	8_8560043	6.95468	-	Potri.008G130200	PF00485	PTHR10285,PTHR10285:SF53	KOG4203	2.7.1.48	-	GO:0016301,GO:0008152,GO:0005524	-	AT2G01460	-	P-loop containing nucleoside triphosphate hydrolases superfamily protein	P-loop containing nucleoside triphosphate hydrolases superfamily protein	-	P-loop containing nucleoside triphosphate hydrolases superfamily protein; FUNCTIONS IN: nucleoside-triphosphatase activity, kinase activity, nucleotide binding, phosphotransferase activity, alcohol group as acceptor, ATP binding; INVOLVED IN: biosynthetic process, metabolic process; LOCATED IN: cellular_component unknown; EXPRESSED IN: 6 plant structures; EXPRESSED DURING: 4 anthesis; CONTAINS In…	PF00485	PTHR10285,PTHR10285:SF53	KOG4203	2.7.1.48	-	GO:0016301,GO:0008152,GO:0005524
8	8560043	1.11e-07	Cu65	Potri.008G130300	8555801	8561469	-	in gene	0	8_8560043	6.95468	-	Potri.008G130300	-	PTHR23284	KOG0771	-	K14003	-	-	AT2G01470	ATSEC12	SEC12P-like 2 protein	SEC12P-like 2 protein	Sec12p-like protein (GTP exchange protein) that functionally complements yeast sec12 null mutant. Protein is localized to the ER.	SEC12P-like 2 protein (STL2P); FUNCTIONS IN: nucleotide binding; INVOLVED IN: ER to Golgi vesicle-mediated transport; LOCATED IN: integral to endoplasmic reticulum membrane, endoplasmic reticulum, plasma membrane, membrane; EXPRESSED IN: 25 plant structures; EXPRESSED DURING: 13 growth stages; CONTAINS InterPro DOMAIN/s: WD40 repeat-like-containing domain (InterPro:IPR011046), WD40-repeat-contain…	-	PTHR23284	KOG0771	-	K14003	-
8	8560043	1.11e-07	Cu65	Potri.008G130400	8563566	8569270	-	5'	3523	8_8560043	6.95468	-	Potri.008G130400	PF01740,PF00916	PTHR11814,PTHR11814:SF93	-	-	K17471	GO:0016021,GO:0015116,GO:0008272,GO:0055085,GO:0016020,GO:0008271	-	AT1G23090	AST91	sulfate transporter 91	sulfate transporter 91	Encodes AST91 mRNA for sulfate transporter.	sulfate transporter 91 (AST91); FUNCTIONS IN: sulfate transmembrane transporter activity; INVOLVED IN: sulfate transport, transport, transmembrane transport; LOCATED IN: integral to membrane, membrane; EXPRESSED IN: 22 plant structures; EXPRESSED DURING: 13 growth stages; CONTAINS InterPro DOMAIN/s: Sulphate transporter (InterPro:IPR011547), Sulphate transporter/antisigma-factor antagonist STAS (…	PF01740,PF00916	PTHR11814,PTHR11814:SF93	-	-	K17471	GO:0016021,GO:0015116,GO:0008272,GO:0055085,GO:0016020,GO:0008271
6	1662549	1.11e-07	Na23	Potri.006G023500	1649436	1660125	-	3'	2424	6_1662549	6.95468	-	Potri.006G023500	PF14631	PTHR32086	-	-	K10891	GO:0006281	-	AT4G14970	-	-	-	-	unknown protein; FUNCTIONS IN: molecular_function unknown; INVOLVED IN: biological_process unknown; LOCATED IN: chloroplast; EXPRESSED IN: 14 plant structures; EXPRESSED DURING: 6 growth stages; Has 257 Blast hits to 164 proteins in 70 species: Archae - 0; Bacteria - 4; Metazoa - 189; Fungi - 0; Plants - 38; Viruses - 0; Other Eukaryotes - 26 (source: NCBI BLink).	PF14631	PTHR32086	-	-	K10891	GO:0006281
6	1662549	1.11e-07	Na23	Potri.006G023600	1666183	1668012	+	5'	3634	6_1662549	6.95468	-	Potri.006G023600	PF00201	PTHR11926,PTHR11926:SF235	KOG1192	2.4.1.324	-	GO:0016758,GO:0008152	-	AT1G22360	AtUGT85A2	UDP-glucosyl transferase 85A2	UDP-glucosyl transferase 85A2	-	UDP-glucosyl transferase 85A2 (UGT85A2); FUNCTIONS IN: UDP-glycosyltransferase activity, transferase activity, transferring glycosyl groups, glucuronosyltransferase activity; INVOLVED IN: metabolic process; LOCATED IN: cellular_component unknown; EXPRESSED IN: 21 plant structures; EXPRESSED DURING: 11 growth stages; CONTAINS InterPro DOMAIN/s: UDP-glucuronosyl/UDP-glucosyltransferase (InterPro:IP…	PF00201	PTHR11926,PTHR11926:SF233	KOG1192	2.4.1.203	-	GO:0016758,GO:0008152
1	31066473	1.12e-07	As75	Potri.001G307600	31053140	31056578	+	3'	9895	1_31066473	6.95078	-	Potri.001G307600	PF08711	PTHR15141	-	-	-	GO:0006351,GO:0005634,GO:0003677	-	AT5G09850	-	Transcription elongation factor (TFIIS) family protein	Transcription elongation factor (TFIIS) family protein	-	Transcription elongation factor (TFIIS) family protein; FUNCTIONS IN: transcription regulator activity, DNA binding; INVOLVED IN: transcription; LOCATED IN: cytosol; EXPRESSED IN: 24 plant structures; EXPRESSED DURING: 15 growth stages; CONTAINS InterPro DOMAIN/s: Transcription factor IIS, N-terminal (InterPro:IPR017923), Transcription elongation factor, TFIIS/CRSP70, N-terminal, sub-type (InterP…	PF08711	PTHR15141	-	-	-	GO:0006351,GO:0005634,GO:0003677
1	31066473	1.12e-07	As75	Potri.001G307700	31059120	31064350	-	3'	2123	1_31066473	6.95078	-	Potri.001G307700	PF14418,PF12872,PF01936	PTHR14379,PTHR14379:SF6	-	-	-	GO:0010468,GO:0005777	-	AT5G09840	-	Putative endonuclease or glycosyl hydrolase	Putative endonuclease or glycosyl hydrolase	-	Putative endonuclease or glycosyl hydrolase; BEST Arabidopsis thaliana protein match is: Putative endonuclease or glycosyl hydrolase (TAIR:AT5G64710.1); Has 416 Blast hits to 392 proteins in 63 species: Archae - 2; Bacteria - 5; Metazoa - 78; Fungi - 41; Plants - 277; Viruses - 0; Other Eukaryotes - 13 (source: NCBI BLink).	PF12872,PF14418,PF01936	PTHR14379,PTHR14379:SF6	-	-	-	GO:0010468,GO:0005777
18	11517997	1.13e-07	P31	Potri.018G088100	11515103	11518476	+	in gene	0	18_11517997	6.94692	-	Potri.018G088100	PF08263,PF00560,PF13855,PF00069	PTHR27000,PTHR27000:SF155	KOG1187	2.7.11.1	-	GO:0005515,GO:0006468,GO:0005524,GO:0004672	-	AT5G25930	-	Protein kinase family protein with leucine-rich repeat domain	Protein kinase family protein with leucine-rich repeat domain	-	Protein kinase family protein with leucine-rich repeat domain; FUNCTIONS IN: kinase activity; INVOLVED IN: protein amino acid phosphorylation; LOCATED IN: plasma membrane, membrane; EXPRESSED IN: 23 plant structures; EXPRESSED DURING: 14 growth stages; CONTAINS InterPro DOMAIN/s: Protein kinase, ATP binding site (InterPro:IPR017441), Protein kinase, catalytic domain (InterPro:IPR000719), Leucine-…	PF08263,PF13855,PF00069	PTHR27000,PTHR27000:SF155	KOG1187	2.7.11.1	K00924	GO:0005515,GO:0006468,GO:0005524,GO:0004672
13	4473220	1.13e-07	Ni60	Potri.013G059700	4471093	4475110	-	in gene	0	13_4473220	6.94692	-	Potri.013G059700	PF07983,PF00332	PTHR32227,PTHR32227:SF95	-	3.2.1.39	-	GO:0005975,GO:0004553	-	AT1G64760	-	O-Glycosyl hydrolases family 17 protein	O-Glycosyl hydrolases family 17 protein	-	O-Glycosyl hydrolases family 17 protein; FUNCTIONS IN: cation binding, hydrolase activity, hydrolyzing O-glycosyl compounds, catalytic activity; INVOLVED IN: carbohydrate metabolic process; LOCATED IN: anchored to plasma membrane, plasma membrane, anchored to membrane; EXPRESSED IN: guard cell, cultured cell; CONTAINS InterPro DOMAIN/s: X8 (InterPro:IPR012946), Glycoside hydrolase, catalytic core…	PF07983,PF00332	PTHR32227,PTHR32227:SF95	-	3.2.1.39	-	GO:0005975,GO:0004553
12	2173778	1.13e-07	Al27	Potri.012G025400	2173779	2177081	-	5'	1	12_2173778	6.94692	-	Potri.012G025400	PF08263,PF00560,PF13855	PTHR27004,PTHR27004:SF1	KOG0472	-	-	GO:0005515	-	AT2G15080	AtRLP19	receptor like protein 19	receptor like protein 19	-	receptor like protein 19 (RLP19); FUNCTIONS IN: kinase activity; INVOLVED IN: signal transduction, defense response; LOCATED IN: endomembrane system; EXPRESSED IN: 10 plant structures; EXPRESSED DURING: 9 growth stages; CONTAINS InterPro DOMAIN/s: Leucine-rich repeat-containing N-terminal domain, type 2 (InterPro:IPR013210), Leucine-rich repeat (InterPro:IPR001611); BEST Arabidopsis thaliana prot…	PF08263,PF00560,PF13855	PTHR27004,PTHR27004:SF37	KOG0472	-	-	GO:0005515
12	2173778	1.13e-07	Al27	Potri.012G025500	2180146	2180528	+	5'	6368	12_2173778	6.94692	-	Potri.012G025500	-	-	-	-	-	-	-	-	-	-	-	-	-	-	-	-	-	-	-
1	32441327	1.13e-07	Al27	Potri.001G319600	32425537	32431946	-	3'	9381	1_32441327	6.94692	-	Potri.001G319600	-	PTHR33022	-	-	-	-	-	AT5G43490	-	-	-	-	unknown protein; Has 1807 Blast hits to 1807 proteins in 277 species: Archae - 0; Bacteria - 0; Metazoa - 736; Fungi - 347; Plants - 385; Viruses - 0; Other Eukaryotes - 339 (source: NCBI BLink).	-	-	-	-	-	-
1	32441327	1.13e-07	Al27	Potri.001G319700	32444567	32445636	-	5'	3240	1_32441327	6.94692	-	Potri.001G319700	-	PTHR31790	-	-	-	-	-	AT4G12560	CPR30	F-box and associated interaction domains-containing protein	F-box and associated interaction domains-containing protein	Encodes CPR1 (Constitutive Expresser of PR Genes 1, also known as CPR30), a F-Box protein that functions as a negative regulator of defense response and targets resistance proteins.	CONSTITUTIVE EXPRESSER OF PR GENES 30 (CPR30); CONTAINS InterPro DOMAIN/s: F-box domain, cyclin-like (InterPro:IPR001810), F-box domain, Skp2-like (InterPro:IPR022364), F-box associated domain, type 1 (InterPro:IPR006527), F-box associated interaction domain (InterPro:IPR017451); BEST Arabidopsis thaliana protein match is: F-box associated ubiquitination effector family protein (TAIR:AT4G22390.1)…	PF00646,PF07734	PTHR32133,PTHR32133:SF121	-	-	-	GO:0005515
1	32441327	1.13e-07	Al27	Potri.001G319800	32449717	32451961	+	5'	8390	1_32441327	6.94692	-	Potri.001G319800	PF00076	PTHR24012	-	-	-	GO:0003676	-	AT4G13850	ATGRP2	glycine-rich RNA-binding protein 2	glycine-rich RNA-binding protein 2	Encodes a glycine-rich RNA-binding protein. Gene expression is induced by cold.	glycine-rich RNA-binding protein 2 (GR-RBP2); FUNCTIONS IN: double-stranded DNA binding, RNA binding, single-stranded DNA binding, copper ion binding, ATP binding; INVOLVED IN: response to cold, seed germination, response to osmotic stress; LOCATED IN: mitochondrion; EXPRESSED IN: 24 plant structures; EXPRESSED DURING: 14 growth stages; CONTAINS InterPro DOMAIN/s: RNA recognition motif, glycine r…	PF00076	PTHR24012	-	-	-	GO:0003676
2	3304187	1.14e-07	As75	Potri.002G050000	3297968	3302851	+	3'	1336	2_3304187	6.9431	-	Potri.002G050000	PF03372	PTHR11200,PTHR11200:SF159	KOG0565	-	-	-	-	AT3G63240	-	DNAse I-like superfamily protein	DNAse I-like superfamily protein	-	DNAse I-like superfamily protein; FUNCTIONS IN: hydrolase activity, inositol or phosphatidylinositol phosphatase activity; INVOLVED IN: biological_process unknown; LOCATED IN: cellular_component unknown; EXPRESSED IN: 10 plant structures; EXPRESSED DURING: 4 anthesis, F mature embryo stage, petal differentiation and expansion stage, E expanded cotyledon stage, D bilateral stage; CONTAINS InterPro…	PF03372	PTHR11200,PTHR11200:SF130	KOG0565	-	-	-
16	14008163	1.15e-07	Mo98	Potri.016G137200	13998474	14002704	+	3'	5459	16_14008163	6.9393	-	Potri.016G137200	PF03647	PTHR12668,PTHR12668:SF19	KOG4267	-	-	GO:0016020	-	AT2G38550	-	Transmembrane proteins 14C	Transmembrane proteins 14C	-	Transmembrane proteins 14C; INVOLVED IN: biological_process unknown; LOCATED IN: mitochondrion, chloroplast, plastid, chloroplast inner membrane, chloroplast envelope; EXPRESSED IN: 23 plant structures; EXPRESSED DURING: 13 growth stages; CONTAINS InterPro DOMAIN/s: Uncharacterised protein family UPF0136, Transmembrane (InterPro:IPR005349); BEST Arabidopsis thaliana protein match is: Transmembran…	PF03647	PTHR12668,PTHR12668:SF19	KOG4267	-	-	GO:0016020
16	14008163	1.15e-07	Mo98	Potri.016G137300	14002260	14008596	-	in gene	0	16_14008163	6.9393	-	Potri.016G137300	PF02225	PTHR22765,PTHR22765:SF58	-	-	-	-	-	AT3G52850	ATELP	vacuolar sorting receptor homolog 1	vacuolar sorting receptor homolog 1	Encodes the Vacuolar Sorting Receptor-1 (VSR-1)/Epidermal Growth Factor Receptor-like protein1(VSR-1/ATELP1). Binds vacuolar targeting signals. Involved in sorting seed storage proteins into vacuoles.	vacuolar sorting receptor homolog 1 (VSR1); FUNCTIONS IN: amino-terminal vacuolar sorting propeptide binding; INVOLVED IN: Golgi to vacuole transport, vacuolar transport, protein targeting to vacuole; LOCATED IN: trans-Golgi network, Golgi apparatus, plasma membrane, integral to plasma membrane, Golgi transport complex; EXPRESSED IN: 24 plant structures; EXPRESSED DURING: 13 growth stages; CONTAI…	PF02225	PTHR22765,PTHR22765:SF58	-	-	-	-
16	14008163	1.15e-07	Mo98	Potri.016G137400	14015822	14017597	+	5'	7659	16_14008163	6.9393	-	Potri.016G137400	PF00067	PTHR24298,PTHR24298:SF86	KOG0156	1.14.13.120	-	GO:0055114,GO:0020037,GO:0016705,GO:0005506	-	AT3G26320	CYP71B36	cytochrome P450, family 71, subfamily B, polypeptide 36	cytochrome P450, family 71, subfamily B, polypeptide 36	putative cytochrome P450	cytochrome P450, family 71, subfamily B, polypeptide 36 (CYP71B36); FUNCTIONS IN: electron carrier activity, monooxygenase activity, iron ion binding, oxygen binding, heme binding; INVOLVED IN: oxidation reduction; LOCATED IN: cellular_component unknown; EXPRESSED IN: 8 plant structures; EXPRESSED DURING: LP.06 six leaves visible, LP.04 four leaves visible, LP.10 ten leaves visible, LP.02 two lea…	PF00067	PTHR24298,PTHR24298:SF85	-	1.14.13.68	K00517	GO:0055114,GO:0020037,GO:0016705,GO:0005506
4	20025438	1.16e-07	Ca43	Potri.004G184000	20028035	20029196	+	5'	2597	4_20025438	6.93554	-	Potri.004G184000	PF03386	PTHR33605,PTHR33605:SF1	-	-	-	-	-	AT5G25940	-	early nodulin-related	early nodulin-related	-	early nodulin-related; FUNCTIONS IN: molecular_function unknown; LOCATED IN: mitochondrion; EXPRESSED IN: 24 plant structures; EXPRESSED DURING: 16 growth stages; CONTAINS InterPro DOMAIN/s: Early nodulin 93 ENOD93 protein (InterPro:IPR005050); Has 1807 Blast hits to 1807 proteins in 277 species: Archae - 0; Bacteria - 0; Metazoa - 736; Fungi - 347; Plants - 385; Viruses - 0; Other Eukaryotes - 3…	PF03386	PTHR33605,PTHR33605:SF3	-	-	-	-
4	20025438	1.16e-07	Ca43	Potri.004G184100	20030432	20032881	+	5'	4994	4_20025438	6.93554	-	Potri.004G184100	PF02877,PF00644	PTHR10459,PTHR10459:SF54	KOG1037	2.4.2.30	K10798	GO:0006471,GO:0003950	-	AT5G22470	-	NAD+ ADP-ribosyltransferases;NAD+ ADP-ribosyltransferases	NAD+ ADP-ribosyltransferases;NAD+ ADP-ribosyltransferases	-	NAD+ ADP-ribosyltransferases;NAD+ ADP-ribosyltransferases; FUNCTIONS IN: NAD+ ADP-ribosyltransferase activity; INVOLVED IN: protein amino acid ADP-ribosylation; LOCATED IN: intracellular, nucleus; CONTAINS InterPro DOMAIN/s: WGR (InterPro:IPR008893), Poly(ADP-ribose) polymerase, regulatory domain (InterPro:IPR004102), PADR1 (InterPro:IPR012982), Poly(ADP-ribose) polymerase, catalytic domain (Inte…	PF00533,PF05406,PF08063,PF02877,PF00644	PTHR10459,PTHR10459:SF54	KOG1037	2.4.2.30	K10798	GO:0005634,GO:0003950,GO:0006471
4	20025438	1.16e-07	Ca43	Potri.004G184200	20034032	20035939	-	5'	8594	4_20025438	6.93554	-	Potri.004G184200	PF00777	PTHR13713,PTHR13713:SF54	-	2.4.99.4	-	GO:0008373,GO:0006486	-	AT1G08280	-	Glycosyltransferase family 29 (sialyltransferase) family protein	Glycosyltransferase family 29 (sialyltransferase) family protein	-	Glycosyltransferase family 29 (sialyltransferase) family protein; FUNCTIONS IN: sialyltransferase activity; INVOLVED IN: protein amino acid glycosylation; LOCATED IN: endomembrane system, integral to Golgi membrane, membrane; EXPRESSED IN: 20 plant structures; EXPRESSED DURING: 11 growth stages; CONTAINS InterPro DOMAIN/s: Sialyltransferase (InterPro:IPR012163), Glycosyl transferase, family 29 (I…	PF00777	PTHR13713,PTHR13713:SF54	KOG2692	2.4.99.4	-	GO:0008373,GO:0006486
19	12829325	1.17e-07	Al27	Potri.019G097900	12818225	12820172	-	3'	9153	19_12829325	6.93181	-	Potri.019G097900	-	-	-	-	-	-	-	-	-	-	-	-	-	-	-	-	-	-	-
19	12829325	1.17e-07	Al27	Potri.019G098000	12820454	12826157	-	3'	3168	19_12829325	6.93181	-
19	12829325	1.17e-07	Al27	Potri.019G098100	12829481	12829987	+	5'	156	19_12829325	6.93181	-	Potri.019G098100	PF00397	PTHR14791	-	-	-	GO:0005515	-	AT3G59770	SAC9	sacI homology domain-containing protein / WW domain-containing protein	sacI homology domain-containing protein / WW domain-containing protein	Encodes a phosphoinositide phosphatase. The sac9 null mutant accumulates elevated levels of PtdIns(4,5)P2 and Ins(1,4,5)P3. The mutant plants have characteristics of constitutive stress responses.	SUPPRESSOR OF ACTIN 9 (SAC9); CONTAINS InterPro DOMAIN/s: WW/Rsp5/WWP (InterPro:IPR001202), Synaptojanin, N-terminal (InterPro:IPR002013); BEST Arabidopsis thaliana protein match is: Phosphoinositide phosphatase family protein (TAIR:AT1G17340.1).	PF00397,PF02383	PTHR11200,PTHR11200:SF119	-	-	-	GO:0005515,GO:0042578
19	12829325	1.17e-07	Al27	Potri.019G098200	12832875	12833064	-	5'	3550	19_12829325	6.93181	-	Potri.019G098200	PF04885	PTHR33227,PTHR33227:SF2	-	-	-	-	-	AT1G53130	GRI	Stigma-specific Stig1 family protein	Stigma-specific Stig1 family protein	Encodes GRIM REAPER (GRI), involved in the regulation of cell death induced by extracellular ROS (reactive oxygen species). Secreted into the extracellular space.	GRIM REAPER (GRI); CONTAINS InterPro DOMAIN/s: Stigma-specific protein Stig1 (InterPro:IPR006969); BEST Arabidopsis thaliana protein match is: Stigma-specific Stig1 family protein (TAIR:AT4G26880.1); Has 276 Blast hits to 191 proteins in 30 species: Archae - 0; Bacteria - 84; Metazoa - 0; Fungi - 32; Plants - 157; Viruses - 0; Other Eukaryotes - 3 (source: NCBI BLink).	PF04885	PTHR33227,PTHR33227:SF2	-	-	-	-
19	12829325	1.17e-07	Al27	Potri.019G098300	12835050	12835453	+	5'	5725	19_12829325	6.93181	-	Potri.019G098300	-	PTHR31563	-	-	-	-	-	AT5G49960	-	-	-	-	unknown protein; CONTAINS InterPro DOMAIN/s: Protein of unknown function DUF1012 (InterPro:IPR010420); BEST Arabidopsis thaliana protein match is: Protein of unknown function (DUF1012) (TAIR:AT5G02940.1); Has 1807 Blast hits to 1807 proteins in 277 species: Archae - 0; Bacteria - 0; Metazoa - 736; Fungi - 347; Plants - 385; Viruses - 0; Other Eukaryotes - 339 (source: NCBI BLink).	PF06241	PTHR31563,PTHR31563:SF1	-	-	-	-
19	12829325	1.17e-07	Al27	Potri.019G098400	12836372	12836681	+	5'	7047	19_12829325	6.93181	-	Potri.019G098400	PF00886	PTHR12919,PTHR12919:SF23	-	-	K02959	GO:0006412,GO:0005840,GO:0005622,GO:0003735	-	AT5G56940	-	Ribosomal protein S16 family protein	Ribosomal protein S16 family protein	-	Ribosomal protein S16 family protein; FUNCTIONS IN: structural constituent of ribosome; INVOLVED IN: translation, ribosome biogenesis; LOCATED IN: mitochondrion, ribosome, plastid; EXPRESSED IN: 22 plant structures; EXPRESSED DURING: 13 growth stages; CONTAINS InterPro DOMAIN/s: Ribosomal protein S16 (InterPro:IPR000307); BEST Arabidopsis thaliana protein match is: small subunit ribosomal protein…	PF00886	PTHR12919,PTHR12919:SF20	KOG3419	-	K02959	GO:0006412,GO:0005840,GO:0005622,GO:0003735
19	12829325	1.17e-07	Al27	Potri.019G098500	12836940	12846655	+	5'	7615	19_12829325	6.93181	-	Potri.019G098500	PF07725,PF13676,PF00931	PTHR11017,PTHR11017:SF174	KOG4658	-	-	GO:0007165,GO:0005515,GO:0043531	-	AT5G17680	-	disease resistance protein (TIR-NBS-LRR class), putative	disease resistance protein (TIR-NBS-LRR class), putative	-	disease resistance protein (TIR-NBS-LRR class), putative; FUNCTIONS IN: transmembrane receptor activity, ATP binding; INVOLVED IN: signal transduction, defense response, apoptosis, innate immune response; LOCATED IN: intrinsic to membrane; EXPRESSED IN: 14 plant structures; EXPRESSED DURING: 6 growth stages; CONTAINS InterPro DOMAIN/s: Leucine-rich repeat, typical subtype (InterPro:IPR003591), NB…	PF07725,PF13676,PF00931	PTHR11017,PTHR11017:SF20	KOG4658	-	-	GO:0007165,GO:0005515,GO:0043531
9	6322526	1.17e-07	Mg25	Potri.009G061100	6310104	6314535	-	3'	7991	9_6322526	6.93181	-	Potri.009G061100	PF01554	PTHR11206,PTHR11206:SF156	KOG1347	-	-	GO:0055085,GO:0016020,GO:0015297,GO:0015238,GO:0006855	-	AT3G08040	ATFRD3	MATE efflux family protein	MATE efflux family protein	Encodes a member of the MATE (multidrug and toxin efflux family), expressed in roots but not shoots. Mutants accumulate excess iron, manganese and zinc, and express root Fe(III) chelatase activity even under iron sufficiency conditions. FRD3 is likely to function in root xylem loading of an iron chelator or other factor necessary for efficient iron uptake out of the xylem or apoplastic space and …	FERRIC REDUCTASE DEFECTIVE 3 (FRD3); FUNCTIONS IN: antiporter activity, transporter activity; INVOLVED IN: cellular iron ion homeostasis; LOCATED IN: plasma membrane, membrane; EXPRESSED IN: 20 plant structures; EXPRESSED DURING: 4 anthesis, F mature embryo stage, petal differentiation and expansion stage, D bilateral stage; CONTAINS InterPro DOMAIN/s: Multi antimicrobial extrusion protein MatE (…	PF01554	PTHR11206,PTHR11206:SF156	KOG1347	-	-	GO:0055085,GO:0016020,GO:0015297,GO:0015238,GO:0006855
9	6322526	1.17e-07	Mg25	Potri.009G061200	6318284	6319678	+	3'	2848	9_6322526	6.93181	-	Potri.009G061200	-	-	-	-	-	-	-	-	-	-	-	-	-	-	-	-	-	-	-
9	6322526	1.17e-07	Mg25	Potri.009G061300	6331884	6334069	-	5'	9358	9_6322526	6.93181	-	Potri.009G061300	-	PTHR31852,PTHR31852:SF46	-	-	-	-	-	AT3G08490	-	-	-	-	BEST Arabidopsis thaliana protein match is: Late embryogenesis abundant protein, group 2 (TAIR:AT3G24600.1); Has 161 Blast hits to 158 proteins in 15 species: Archae - 0; Bacteria - 0; Metazoa - 0; Fungi - 0; Plants - 161; Viruses - 0; Other Eukaryotes - 0 (source: NCBI BLink).	-	PTHR31852,PTHR31852:SF46	-	-	-	-
10	16109977	1.18e-07	Al27	Potri.010G153300	16094982	16104972	+	3'	5005	10_16109977	6.92812	-	Potri.010G153300	PF00400,PF00069,PF02138	PTHR13743,PTHR13743:SF57	KOG1786	-	K17601	GO:0005515,GO:0006468,GO:0005524,GO:0004672	-	AT5G18525	-	protein serine/threonine kinases;protein tyrosine kinases;ATP binding;protein kinases	protein serine/threonine kinases;protein tyrosine kinases;ATP binding;protein kinases	-	protein serine/threonine kinases;protein tyrosine kinases;ATP binding;protein kinases; FUNCTIONS IN: protein serine/threonine kinase activity, protein tyrosine kinase activity, protein kinase activity, ATP binding; INVOLVED IN: protein amino acid phosphorylation; LOCATED IN: CUL4 RING ubiquitin ligase complex; EXPRESSED IN: 22 plant structures; EXPRESSED DURING: 13 growth stages; CONTAINS InterPr…	PF00069,PF02138	PTHR13743,PTHR13743:SF57	-	-	K17601	GO:0006468,GO:0005524,GO:0004672
10	16109977	1.18e-07	Al27	Potri.010G153400	16106603	16108662	-	3'	1315	10_16109977	6.92812	-	Potri.010G153400	PF04110	PTHR10969,PTHR10969:SF36	KOG1654	-	K08341	GO:0005737,GO:0000045	-	AT3G15580	APG8H	Ubiquitin-like superfamily protein	Ubiquitin-like superfamily protein	Encodes APG8, a component of autophagy conjugation pathway. Delivered to the lumens of vacuole under nitrogen-starvation condition.	AUTOPHAGY 8H (APG8H); CONTAINS InterPro DOMAIN/s: Light chain 3 (LC3) (InterPro:IPR004241); BEST Arabidopsis thaliana protein match is: Ubiquitin-like superfamily protein (TAIR:AT3G06420.1); Has 1501 Blast hits to 1499 proteins in 273 species: Archae - 0; Bacteria - 0; Metazoa - 719; Fungi - 178; Plants - 302; Viruses - 3; Other Eukaryotes - 299 (source: NCBI BLink).	PF04110	PTHR10969,PTHR10969:SF25	KOG1654	-	K08341	GO:0005737,GO:0000045
10	16109977	1.18e-07	Al27	Potri.010G153500	16111968	16114202	+	5'	1991	10_16109977	6.92812	-	Potri.010G153500	PF00438,PF02772,PF02773	PTHR11964,PTHR11964:SF16	-	2.5.1.6	K00789	GO:0006556,GO:0004478,GO:0005524	-	AT1G02500	AtSAM1	S-adenosylmethionine synthetase 1	S-adenosylmethionine synthetase 1	encodes a S-adenosylmethionine synthetase. SAM1 is regulated by protein S-nitrosylation. The covalent binding of nitric oxide (NO) to the Cys114 residue inhibits the enzyme activity.	S-adenosylmethionine synthetase 1 (SAM1); FUNCTIONS IN: methionine adenosyltransferase activity; INVOLVED IN: response to cadmium ion, response to salt stress, ethylene biosynthetic process, S-adenosylmethionine biosynthetic process; LOCATED IN: cell wall, plasma membrane, membrane; EXPRESSED IN: 30 plant structures; EXPRESSED DURING: 17 growth stages; CONTAINS InterPro DOMAIN/s: S-adenosylmethio…	PF00438,PF02772,PF02773	PTHR11964,PTHR11964:SF18	-	2.5.1.6	K00789	GO:0006556,GO:0004478,GO:0005524
10	16109977	1.18e-07	Al27	Potri.010G153600	16118497	16127015	+	5'	8520	10_16109977	6.92812	-	Potri.010G153600	PF14510,PF08370,PF00005,PF01061	PTHR19241,PTHR19241:SF297	-	-	-	GO:0016887,GO:0005524,GO:0016020	-	AT3G53480	ABCG37	pleiotropic drug resistance 9	pleiotropic drug resistance 9	Negative regulator of auxin polar transport inhibitors. ABCG37 regulates auxin distribution and homeostasis in roots by excluding IBA from the root apex, but does not act directly in basipetal transport. ABCG37 and ABCG36 act redundantly at outermost root plasma membranes and, transport IBA out of the cells.	pleiotropic drug resistance 9 (PDR9); FUNCTIONS IN: ATPase activity, coupled to transmembrane movement of substances, transporter activity; INVOLVED IN: cellular response to indolebutyric acid stimulus, drug transmembrane transport, root development, auxin polar transport; LOCATED IN: plasma membrane; EXPRESSED IN: 7 plant structures; EXPRESSED DURING: 4 anthesis; CONTAINS InterPro DOMAIN/s: ATPa…	PF14510,PF08370,PF00005,PF01061	PTHR19241,PTHR19241:SF259	-	-	-	GO:0016887,GO:0005524,GO:0016020
9	2029774	1.18e-07	Cu65	Potri.009G011200	2017217	2025040	+	3'	4734	9_2029774	6.92812	-	Potri.009G011200	PF00169,PF01852,PF07059	PTHR12136,PTHR12136:SF41	-	-	-	GO:0008289	-	AT2G28320	-	Pleckstrin homology (PH) and lipid-binding START domains-containing protein	Pleckstrin homology (PH) and lipid-binding START domains-containing protein	-	Pleckstrin homology (PH) and lipid-binding START domains-containing protein; FUNCTIONS IN: phosphoinositide binding; INVOLVED IN: signal transduction; LOCATED IN: plasma membrane; EXPRESSED IN: 24 plant structures; EXPRESSED DURING: 15 growth stages; CONTAINS InterPro DOMAIN/s: Protein of unknown function DUF1336 (InterPro:IPR009769), Pleckstrin homology-type (InterPro:IPR011993), Lipid-binding S…	PF00169,PF01852,PF07059	PTHR12136,PTHR12136:SF41	-	-	-	GO:0008289
9	2029774	1.18e-07	Cu65	Potri.009G011300	2034174	2034661	+	5'	4400	9_2029774	6.92812	-	Potri.009G011300	-	-	-	-	-	-	-	-	-	-	-	-	-	-	-	-	-	-	-
9	2029774	1.18e-07	Cu65	Potri.009G011400	2035479	2041342	+	5'	5705	9_2029774	6.92812	-	Potri.009G011400	PF03567	PTHR12812	-	2.8.2.20	-	GO:0016021,GO:0008146	-	AT1G08030	TPST	tyrosylprotein sulfotransferase	tyrosylprotein sulfotransferase	Encodes a tyrosylprotein sulfotransferase (TPST). This protein is a 500-aa type I transmembrane protein that shows no sequence similarity to animal TPSTs. Activity confirmed by protein expression in yeast. TPST is expressed throughout the plant body, and the highest levels of expression are in the root apical meristem. TPST acts in the auxin pathway to maintain postembryonic root stem cell niche …	tyrosylprotein sulfotransferase (TPST); FUNCTIONS IN: protein-tyrosine sulfotransferase activity; INVOLVED IN: carbohydrate biosynthetic process; LOCATED IN: Golgi apparatus; EXPRESSED IN: 26 plant structures; EXPRESSED DURING: 15 growth stages; CONTAINS InterPro DOMAIN/s: Sulfotransferase (InterPro:IPR005331), Heparan sulphate 6-sulfotransferase (InterPro:IPR010635); Has 30201 Blast hits to 1732…	PF03567	PTHR12812,PTHR12812:SF0	-	2.8.2.20	-	GO:0016021,GO:0008146
17	11581707	1.19e-07	Cu65	Potri.017G098200	11568933	11571879	+	3'	9828	17_11581707	6.92445	-	Potri.017G098200	PF11721,PF07714	PTHR27003,PTHR27003:SF104	KOG1187	2.7.11.1	-	GO:0006468,GO:0004672	-	AT5G39000	-	Malectin/receptor-like protein kinase family protein	Malectin/receptor-like protein kinase family protein	-	Malectin/receptor-like protein kinase family protein; FUNCTIONS IN: kinase activity; INVOLVED IN: protein amino acid phosphorylation; LOCATED IN: endomembrane system; CONTAINS InterPro DOMAIN/s: Protein kinase, ATP binding site (InterPro:IPR017441), Malectin/receptor-like protein kinase (InterPro:IPR021720), Protein kinase, catalytic domain (InterPro:IPR000719), Serine-threonine/tyrosine-protein …	PF11721,PF07714	PTHR27003,PTHR27003:SF104	KOG1187	2.7.11.1	-	GO:0006468,GO:0004672
17	11581707	1.19e-07	Cu65	Potri.017G098300	11587364	11587962	+	5'	5657	17_11581707	6.92445	-	Potri.017G098300	PF05498	PTHR39112,PTHR39112:SF1	-	-	-	-	-	AT3G29780	RALFL27	ralf-like 27	ralf-like 27	Member of a diversely expressed predicted peptide family showing sequence similarity to tobacco Rapid Alkalinization Factor (RALF), and is believed to play an essential role in the physiology of Arabidopsis. Consists of a single exon and is characterized by a conserved C-terminal motif and N-terminal signal peptide.	ralf-like 27 (RALFL27); CONTAINS InterPro DOMAIN/s: Rapid ALkalinization Factor (InterPro:IPR008801); Has 35 Blast hits to 35 proteins in 5 species: Archae - 0; Bacteria - 0; Metazoa - 0; Fungi - 0; Plants - 35; Viruses - 0; Other Eukaryotes - 0 (source: NCBI BLink).	PF05498	PTHR39112,PTHR39112:SF1	-	-	-	-
17	11581707	1.19e-07	Cu65	Potri.017G098400	11588815	11592388	+	5'	7108	17_11581707	6.92445	-
1	7898152	1.19e-07	Al27	Potri.001G099800	7899208	7901430	+	5'	1056	1_7898152	6.92445	-	Potri.001G099800	PF00249	PTHR10641,PTHR10641:SF667	KOG0048	-	K09422	-	MYB	AT1G63910	AtMYB103	myb domain protein 103	myb domain protein 103	member of MYB3R- and R2R3- type MYB- encoding genes	myb domain protein 103 (AtMYB103); CONTAINS InterPro DOMAIN/s: SANT, DNA-binding (InterPro:IPR001005), Homeodomain-like (InterPro:IPR009057), Myb, DNA-binding (InterPro:IPR014778), HTH transcriptional regulator, Myb-type, DNA-binding (InterPro:IPR017930), Homeodomain-related (InterPro:IPR012287), Myb transcription factor (InterPro:IPR015495); BEST Arabidopsis thaliana protein match is: myb domain…	PF00249	PTHR10641,PTHR10641:SF451	KOG0048	-	K09422	-
16	4395882	1.21e-07	Al27	Potri.016G062500	4391489	4394317	-	3'	1565	16_4395882	6.91721	-	Potri.016G062500	PF00076	PTHR23147,PTHR23147:SF6	KOG0107,KOG0151,KOG0114	-	K12900	GO:0003676	-	AT1G55310	ATSCL33	SC35-like splicing factor 33	SC35-like splicing factor 33	Encodes a SR spliceosome protein that is localized to nuclear specks, interacts with SR45 and the U1-70K protein of the U1 snRNP, has sequence similar to human SC35 protein. Barta et al (2010) have proposed a nomenclature for Serine/Arginine-Rich Protein Splicing Factors (SR proteins): Plant Cell. 2010, 22:2926.	SC35-like splicing factor 33 (SR33); FUNCTIONS IN: protein binding, RNA binding; INVOLVED IN: nuclear mRNA splicing, via spliceosome, RNA splicing; LOCATED IN: interchromatin granule, nuclear speck, nucleolus, plasma membrane; EXPRESSED IN: 25 plant structures; EXPRESSED DURING: 14 growth stages; CONTAINS InterPro DOMAIN/s: RNA recognition motif, RNP-1 (InterPro:IPR000504), Nucleotide-binding, al…	PF00076	PTHR23147,PTHR23147:SF6	KOG0107	-	K12900	GO:0003676
16	4395882	1.21e-07	Al27	Potri.016G062600	4398392	4416329	+	5'	2510	16_4395882	6.91721	-	Potri.016G062600	PF05843,PF00575	PTHR23270,PTHR23270:SF10	-	-	K14792	GO:0006397,GO:0005634,GO:0003676	-	AT3G11964	-	RNA binding;RNA binding	RNA binding;RNA binding	Encodes a nucleolar protein that is a ribosome biogenesis co-factor. Mutants display aberrant RNA processing and female gametophyte development.	RNA binding;RNA binding; FUNCTIONS IN: RNA binding; INVOLVED IN: mRNA processing, RNA processing; LOCATED IN: nucleolus, plasma membrane; EXPRESSED IN: 22 plant structures; EXPRESSED DURING: 13 growth stages; CONTAINS InterPro DOMAIN/s: Nucleic acid-binding, OB-fold (InterPro:IPR012340), Nucleic acid-binding, OB-fold-like (InterPro:IPR016027), Ribosomal protein S1, RNA-binding domain (InterPro:IP…	PF05843,PF00575	PTHR23270,PTHR23270:SF10	-	-	K14792	GO:0006397,GO:0005634,GO:0003676
17	2311718	1.22e-07	Na23	Potri.017G025100	2309796	2311312	+	3'	406	17_2311718	6.91364	-	Potri.017G025100	PF03140	PTHR31170	-	-	-	-	-	AT3G60470	-	Plant protein of unknown function (DUF247)	Plant protein of unknown function (DUF247)	-	Plant protein of unknown function (DUF247); CONTAINS InterPro DOMAIN/s: Protein of unknown function DUF247, plant (InterPro:IPR004158); BEST Arabidopsis thaliana protein match is: Plant protein of unknown function (DUF247) (TAIR:AT2G28580.1); Has 1401 Blast hits to 907 proteins in 17 species: Archae - 0; Bacteria - 0; Metazoa - 0; Fungi - 0; Plants - 1401; Viruses - 0; Other Eukaryotes - 0 (sourc…	PF03140	PTHR31170	-	-	-	-
2	13024907	1.24e-07	Co59	Potri.002G171300	13013713	13017406	+	3'	7501	2_13024907	6.90658	-	Potri.002G171300	PF02681	PTHR31446,PTHR31446:SF4	-	-	-	-	-	AT3G61770	-	Acid phosphatase/vanadium-dependent haloperoxidase-related protein	Acid phosphatase/vanadium-dependent haloperoxidase-related protein	-	Acid phosphatase/vanadium-dependent haloperoxidase-related protein; FUNCTIONS IN: molecular_function unknown; INVOLVED IN: biological_process unknown; LOCATED IN: chloroplast; EXPRESSED IN: 22 plant structures; EXPRESSED DURING: 13 growth stages; CONTAINS InterPro DOMAIN/s: Acid phosphatase/vanadium-dependent haloperoxidase related (InterPro:IPR003832); BEST Arabidopsis thaliana protein match is:…	PF02681	PTHR31446,PTHR31446:SF4	-	-	-	-
2	13024907	1.24e-07	Co59	Potri.002G171400	13019692	13019850	+	3'	5057	2_13024907	6.90658	-	Potri.002G171400	-	PTHR10666	-	2.7.1.67	-	-	-	AT1G64460	-	Protein kinase superfamily protein	Protein kinase superfamily protein	-	Protein kinase superfamily protein; FUNCTIONS IN: inositol or phosphatidylinositol kinase activity, phosphotransferase activity, alcohol group as acceptor; INVOLVED IN: biological_process unknown; LOCATED IN: vacuole; EXPRESSED IN: 24 plant structures; EXPRESSED DURING: 15 growth stages; CONTAINS InterPro DOMAIN/s: Phosphatidylinositol 3-/4-kinase, catalytic (InterPro:IPR000403); BEST Arabidopsis…	PF00454	PTHR10666,PTHR10666:SF134	KOG2381	2.7.1.67	-	GO:0016773
2	13024907	1.24e-07	Co59	Potri.002G171500	13021362	13024859	-	3'	48	2_13024907	6.90658	-	Potri.002G171500	PF03145	PTHR10315,PTHR10315:SF34	KOG3002	6.3.2.19	K04506	GO:0007275,GO:0006511,GO:0005634	-	AT3G61790	-	Protein with RING/U-box and TRAF-like domains	Protein with RING/U-box and TRAF-like domains	-	Protein with RING/U-box and TRAF-like domains; FUNCTIONS IN: ubiquitin-protein ligase activity, zinc ion binding; INVOLVED IN: multicellular organismal development, ubiquitin-dependent protein catabolic process, protein ubiquitination; LOCATED IN: nucleus; EXPRESSED IN: 24 plant structures; EXPRESSED DURING: 13 growth stages; CONTAINS InterPro DOMAIN/s: TRAF-like (InterPro:IPR008974), Seven-in-ab…	PF03145	PTHR10315,PTHR10315:SF34	KOG3002	6.3.2.19	K04506	GO:0007275,GO:0006511,GO:0005634
2	13024907	1.24e-07	Co59	Potri.002G171600	13029447	13032264	-	5'	4540	2_13024907	6.90658	-	Potri.002G171600	PF09740	PTHR28670	KOG2374	-	-	-	-	AT3G61800	-	-	-	-	CONTAINS InterPro DOMAIN/s: Protein of unknown function DUF2043 (InterPro:IPR018610), ENTH/VHS (InterPro:IPR008942); Has 308 Blast hits to 279 proteins in 95 species: Archae - 2; Bacteria - 30; Metazoa - 120; Fungi - 19; Plants - 44; Viruses - 2; Other Eukaryotes - 91 (source: NCBI BLink).	PF09740	PTHR28670	-	-	-	-
2	23862216	1.25e-07	Cu65	Potri.002G247900	23852287	23855302	-	3'	6914	2_23862216	6.90309	-	Potri.002G247900	PF07983,PF00332	PTHR32227,PTHR32227:SF65	-	3.2.1.39	-	GO:0005975,GO:0004553	-	AT3G07320	-	O-Glycosyl hydrolases family 17 protein	O-Glycosyl hydrolases family 17 protein	-	O-Glycosyl hydrolases family 17 protein; FUNCTIONS IN: cation binding, hydrolase activity, hydrolyzing O-glycosyl compounds, catalytic activity; INVOLVED IN: carbohydrate metabolic process; LOCATED IN: plant-type cell wall; EXPRESSED IN: 24 plant structures; EXPRESSED DURING: 15 growth stages; CONTAINS InterPro DOMAIN/s: X8 (InterPro:IPR012946), Glycoside hydrolase, catalytic core (InterPro:IPR01…	PF07983,PF00332	PTHR32227,PTHR32227:SF65	-	3.2.1.39	-	GO:0005975,GO:0004553
2	23862216	1.25e-07	Cu65	Potri.002G248000	23864395	23869373	-	5'	2179	2_23862216	6.90309	-	Potri.002G248000	-	-	-	-	-	-	-	-	-	-	-	-	-	-	-	-	-	-	-
2	23862216	1.25e-07	Cu65	Potri.002G248100	23870091	23872073	+	5'	7875	2_23862216	6.90309	-	Potri.002G248100	PF12854,PF13041	PTHR24015,PTHR24015:SF355	-	-	-	-	-	AT3G25210	-	Tetratricopeptide repeat (TPR)-like superfamily protein	Tetratricopeptide repeat (TPR)-like superfamily protein	-	Tetratricopeptide repeat (TPR)-like superfamily protein; FUNCTIONS IN: molecular_function unknown; INVOLVED IN: biological_process unknown; LOCATED IN: chloroplast; EXPRESSED IN: 19 plant structures; EXPRESSED DURING: 13 growth stages; CONTAINS InterPro DOMAIN/s: Pentatricopeptide repeat (InterPro:IPR002885); BEST Arabidopsis thaliana protein match is: Tetratricopeptide repeat (TPR)-like superfam…	PF13041	PTHR24015,PTHR24015:SF355	-	-	-	-
15	1288787	1.27e-07	Al27	Potri.015G017500	1268751	1280174	+	3'	8613	15_1288787	6.8962	-	Potri.015G017500	PF14691,PF07992,PF01493,PF04898,PF01645,PF00310	PTHR11938,PTHR11938:SF109	-	1.4.1.14	K00264	GO:0055114,GO:0016491,GO:0008152,GO:0015930,GO:0006807,GO:0016638,GO:0006537	-	AT5G53460	GLT1	NADH-dependent glutamate synthase 1	NADH-dependent glutamate synthase 1	NADH-dependent glutamate synthase	NADH-dependent glutamate synthase 1 (GLT1); CONTAINS InterPro DOMAIN/s: FAD-dependent pyridine nucleotide-disulphide oxidoreductase (InterPro:IPR013027), Glutamine amidotransferase, class-II (InterPro:IPR000583), Aldolase-type TIM barrel (InterPro:IPR013785), Glutamate synthase, alpha subunit, C-terminal (InterPro:IPR002489), Adrenodoxin reductase (InterPro:IPR000759), Glutamate synthase, NADH/NA…	PF14691,PF07992,PF01493,PF04898,PF01645,PF00310	PTHR11938,PTHR11938:SF109	-	1.4.1.14	K00264	GO:0055114,GO:0016491,GO:0008152,GO:0015930,GO:0006807,GO:0016638,GO:0006537
15	1288787	1.27e-07	Al27	Potri.015G017600	1281580	1282283	-	3'	6504	15_1288787	6.8962	-	Potri.015G017600	-	PTHR35751,PTHR35751:SF1	-	-	-	-	-	AT5G24165	-	-	-	-	unknown protein; FUNCTIONS IN: molecular_function unknown; INVOLVED IN: biological_process unknown; LOCATED IN: chloroplast; EXPRESSED IN: 22 plant structures; EXPRESSED DURING: 13 growth stages; BEST Arabidopsis thaliana protein match is: unknown protein (TAIR:AT4G23885.1); Has 30201 Blast hits to 17322 proteins in 780 species: Archae - 12; Bacteria - 1396; Metazoa - 17338; Fungi - 3422; Plants …	-	PTHR35751,PTHR35751:SF1	-	-	-	-
15	1288787	1.27e-07	Al27	Potri.015G017700	1282630	1284270	+	3'	4517	15_1288787	6.8962	-	Potri.015G017700	PF07896	PTHR28524	-	-	-	-	-	AT5G67490	-	-	-	-	unknown protein; CONTAINS InterPro DOMAIN/s: Protein of unknown function DUF1674 (InterPro:IPR012875); Has 30201 Blast hits to 17322 proteins in 780 species: Archae - 12; Bacteria - 1396; Metazoa - 17338; Fungi - 3422; Plants - 5037; Viruses - 0; Other Eukaryotes - 2996 (source: NCBI BLink).	PF07896	PTHR28524,PTHR28524:SF3	KOG3245	-	-	-
15	1288787	1.27e-07	Al27	Potri.015G017800	1285062	1288185	+	3'	602	15_1288787	6.8962	-	Potri.015G017800	PF13947,PF14380,PF13639	PTHR27009,PTHR27009:SF18	-	-	-	GO:0030247,GO:0008270,GO:0005515	-	AT5G53110	-	RING/U-box superfamily protein	RING/U-box superfamily protein	-	RING/U-box superfamily protein; FUNCTIONS IN: zinc ion binding; INVOLVED IN: biological_process unknown; LOCATED IN: endomembrane system; EXPRESSED IN: 8 plant structures; EXPRESSED DURING: 4 anthesis, C globular stage, petal differentiation and expansion stage; CONTAINS InterPro DOMAIN/s: Zinc finger, RING-type (InterPro:IPR001841), Zinc finger, C3HC4 RING-type (InterPro:IPR018957); BEST Arabido…	PF13947,PF13639	PTHR14155,PTHR14155:SF157	-	-	-	GO:0030247,GO:0008270,GO:0005515
15	1288787	1.27e-07	Al27	Potri.015G017900	1291204	1291464	+	5'	2417	15_1288787	6.8962	-	Potri.015G017900	PF00069	PTHR27009	-	3.1.4.46	-	GO:0006468,GO:0005524,GO:0004672	-	AT5G38240	-	Protein kinase family protein	Protein kinase family protein	-	Protein kinase family protein; FUNCTIONS IN: protein serine/threonine kinase activity, protein kinase activity, kinase activity, ATP binding; INVOLVED IN: protein amino acid phosphorylation; LOCATED IN: endomembrane system; CONTAINS InterPro DOMAIN/s: Protein kinase, ATP binding site (InterPro:IPR017441), Serine/threonine-protein kinase domain (InterPro:IPR002290), Serine-threonine/tyrosine-prote…	PF13947,PF00069	PTHR27009,PTHR27009:SF21	KOG1187	3.1.4.46	-	GO:0030247,GO:0006468,GO:0005524,GO:0004672
15	1288787	1.27e-07	Al27	Potri.015G018000	1294560	1297744	-	5'	5773	15_1288787	6.8962	-	Potri.015G018000	PF00069	PTHR27009,PTHR27009:SF18	KOG1187	3.1.4.46	-	GO:0006468,GO:0005524,GO:0004672	-	AT1G66920	-	Protein kinase superfamily protein	Protein kinase superfamily protein	-	Protein kinase superfamily protein; FUNCTIONS IN: protein serine/threonine kinase activity, protein kinase activity, kinase activity, ATP binding; INVOLVED IN: protein amino acid phosphorylation; LOCATED IN: endomembrane system; CONTAINS InterPro DOMAIN/s: Protein kinase, ATP binding site (InterPro:IPR017441), Serine/threonine-protein kinase domain (InterPro:IPR002290), Serine-threonine/tyrosine-…	PF00069	PTHR27009,PTHR27009:SF21	KOG1187	3.1.4.46	-	GO:0006468,GO:0005524,GO:0004672
9	8145542	1.27e-07	Co59	Potri.009G087500	8132467	8135584	-	3'	9958	9_8145542	6.8962	-	Potri.009G087500	PF00564,PF02042	PTHR32002,PTHR32002:SF3	-	-	-	GO:0005515	Nin-like	AT4G35270	-	Plant regulator RWP-RK family protein	Plant regulator RWP-RK family protein	-	Plant regulator RWP-RK family protein; CONTAINS InterPro DOMAIN/s: Octicosapeptide/Phox/Bem1p (InterPro:IPR000270), Plant regulator RWP-RK (InterPro:IPR003035); BEST Arabidopsis thaliana protein match is: Plant regulator RWP-RK family protein (TAIR:AT2G17150.1); Has 705 Blast hits to 622 proteins in 59 species: Archae - 0; Bacteria - 9; Metazoa - 13; Fungi - 14; Plants - 585; Viruses - 3; Other E…	PF00564,PF02042	PTHR32002,PTHR32002:SF3	-	-	-	GO:0005515
9	8145542	1.27e-07	Co59	Potri.009G087600	8137125	8139405	-	3'	6137	9_8145542	6.8962	-	Potri.009G087600	PF00331	PTHR31490,PTHR31490:SF18	-	3.2.1.8	-	GO:0005975,GO:0004553	-	AT4G33820	-	Glycosyl hydrolase superfamily protein	Glycosyl hydrolase superfamily protein	-	Glycosyl hydrolase superfamily protein; FUNCTIONS IN: cation binding, hydrolase activity, hydrolyzing O-glycosyl compounds, catalytic activity; INVOLVED IN: carbohydrate metabolic process; LOCATED IN: endomembrane system; CONTAINS InterPro DOMAIN/s: Glycoside hydrolase, family 10 (InterPro:IPR001000), Glycoside hydrolase, catalytic core (InterPro:IPR017853), Glycoside hydrolase, subgroup, catalyt…	PF00331	PTHR31490,PTHR31490:SF18	-	3.2.1.8	-	GO:0005975,GO:0004553
9	8145542	1.27e-07	Co59	Potri.009G087700	8141602	8144799	-	3'	743	9_8145542	6.8962	-	Potri.009G087700	PF00331	PTHR31490,PTHR31490:SF18	-	3.2.1.8	-	GO:0005975,GO:0004553	-	AT4G33860	-	Glycosyl hydrolase family 10 protein	Glycosyl hydrolase family 10 protein	-	Glycosyl hydrolase family 10 protein; FUNCTIONS IN: cation binding, hydrolase activity, hydrolyzing O-glycosyl compounds, catalytic activity; INVOLVED IN: carbohydrate metabolic process; LOCATED IN: endomembrane system; CONTAINS InterPro DOMAIN/s: Glycoside hydrolase, family 10 (InterPro:IPR001000), Carbohydrate-binding, CenC-like (InterPro:IPR003305), Glycoside hydrolase, catalytic core (InterPr…	PF02018,PF00331	PTHR31490,PTHR31490:SF2	-	3.2.1.8	-	GO:0016798,GO:0005975,GO:0004553
9	8145542	1.27e-07	Co59	Potri.009G087800	8147214	8150390	-	5'	1672	9_8145542	6.8962	-	Potri.009G087800	PF02018,PF00331	PTHR31490,PTHR31490:SF18	-	3.2.1.8	-	GO:0016798,GO:0005975,GO:0004553	-	AT4G33840	-	Glycosyl hydrolase family 10 protein	Glycosyl hydrolase family 10 protein	-	Glycosyl hydrolase family 10 protein; FUNCTIONS IN: cation binding, hydrolase activity, hydrolyzing O-glycosyl compounds, catalytic activity; INVOLVED IN: carbohydrate metabolic process; LOCATED IN: endomembrane system; CONTAINS InterPro DOMAIN/s: Glycoside hydrolase, family 10 (InterPro:IPR001000), Carbohydrate-binding, CenC-like (InterPro:IPR003305), Glycoside hydrolase, catalytic core (InterPr…	PF02018,PF00331	PTHR31490,PTHR31490:SF2	-	3.2.1.8	-	GO:0016798,GO:0005975,GO:0004553
9	8145542	1.27e-07	Co59	Potri.009G087900	8152253	8156047	-	5'	6711	9_8145542	6.8962	-
6	25344820	1.27e-07	Mo98	Potri.006G245900	25337833	25339670	-	3'	5150	6_25344820	6.8962	-	Potri.006G245900	PF16983	PTHR31970,PTHR31970:SF3	-	-	-	-	-	AT2G25680	MOT1	molybdate transporter 1	molybdate transporter 1	Encodes a high-affinity molybdate transporter. Mutant has reduced concentrations of molybdate in roots and shoots, and reduced shoot and root length when growing on Mo-limited medium.	molybdate transporter 1 (MOT1); FUNCTIONS IN: molybdate ion transmembrane transporter activity, sulfate transmembrane transporter activity; INVOLVED IN: molybdate ion transport; LOCATED IN: mitochondrion, vacuole; EXPRESSED IN: 13 plant structures; EXPRESSED DURING: LP.04 four leaves visible, 4 anthesis, petal differentiation and expansion stage; BEST Arabidopsis thaliana protein match is: sulfat…	PF16983	PTHR31970,PTHR31970:SF3	-	-	-	-
6	25344820	1.27e-07	Mo98	Potri.006G246000	25345115	25347031	+	5'	295	6_25344820	6.8962	-	Potri.006G246000	PF16983	PTHR31970,PTHR31970:SF3	-	-	-	-	-	AT2G25680	MOT1	molybdate transporter 1	molybdate transporter 1	Encodes a high-affinity molybdate transporter. Mutant has reduced concentrations of molybdate in roots and shoots, and reduced shoot and root length when growing on Mo-limited medium.	molybdate transporter 1 (MOT1); FUNCTIONS IN: molybdate ion transmembrane transporter activity, sulfate transmembrane transporter activity; INVOLVED IN: molybdate ion transport; LOCATED IN: mitochondrion, vacuole; EXPRESSED IN: 13 plant structures; EXPRESSED DURING: LP.04 four leaves visible, 4 anthesis, petal differentiation and expansion stage; BEST Arabidopsis thaliana protein match is: sulfat…	PF16983	PTHR31970,PTHR31970:SF3	-	-	-	-
6	25344820	1.27e-07	Mo98	Potri.006G246100	25350095	25356024	-	5'	5275	6_25344820	6.8962	-	Potri.006G246100	PF01412	PTHR23180,PTHR23180:SF266	KOG0702	-	-	GO:0005096	-	AT4G32630	-	ArfGap/RecO-like zinc finger domain-containing protein	ArfGap/RecO-like zinc finger domain-containing protein	-	ArfGap/RecO-like zinc finger domain-containing protein; FUNCTIONS IN: ARF GTPase activator activity, zinc ion binding; INVOLVED IN: regulation of ARF GTPase activity; LOCATED IN: cellular_component unknown; EXPRESSED IN: 18 plant structures; EXPRESSED DURING: 10 growth stages; CONTAINS InterPro DOMAIN/s: Arf GTPase activating protein (InterPro:IPR001164); BEST Arabidopsis thaliana protein match i…	PF01412	PTHR23180,PTHR23180:SF266	-	-	-	GO:0005096
6	10782712	1.28e-07	Al27	Potri.006G131500	10779854	10781784	+	3'	928	6_10782712	6.89279	-	Potri.006G131500	PF00164	PTHR11652,PTHR11652:SF16	KOG1749	-	K02973	GO:0006412,GO:0005840,GO:0005622,GO:0003735	-	AT5G02960	-	Ribosomal protein S12/S23 family protein	Ribosomal protein S12/S23 family protein	-	Ribosomal protein S12/S23 family protein; FUNCTIONS IN: structural constituent of ribosome; INVOLVED IN: translation; LOCATED IN: cytosolic small ribosomal subunit, cytosolic ribosome, ribosome; EXPRESSED IN: guard cell, leaf; CONTAINS InterPro DOMAIN/s: Ribosomal protein S23, eukaryotic/archaeal (InterPro:IPR005680), Ribosomal protein S12/S23 (InterPro:IPR006032), Nucleic acid-binding, OB-fold-l…	PF00164	PTHR11652,PTHR11652:SF16	KOG1749	-	K02973	GO:0006412,GO:0005840,GO:0005622,GO:0003735
6	10782712	1.28e-07	Al27	Potri.006G131600	10789470	10791251	-	5'	6758	6_10782712	6.89279	-	Potri.006G131600	-	-	-	-	-	-	-	-	-	-	-	-	-	-	-	-	-	-	-
6	10782712	1.28e-07	Al27	Potri.006G131700	10791403	10796351	-	5'	8691	6_10782712	6.89279	-	Potri.006G131700	-	PTHR33737,PTHR33737:SF2	-	-	-	-	-	AT3G53320	-	-	-	-	unknown protein; BEST Arabidopsis thaliana protein match is: unknown protein (TAIR:AT2G37070.1); Has 11044 Blast hits to 5993 proteins in 551 species: Archae - 8; Bacteria - 1486; Metazoa - 4078; Fungi - 1814; Plants - 348; Viruses - 112; Other Eukaryotes - 3198 (source: NCBI BLink).	-	PTHR33737	-	-	-	-
2	878562	1.3e-07	Ni60	Potri.002G014900	869392	871541	+	3'	7021	2_878562	6.88606	-	Potri.002G014900	PF00581	PTHR12231	KOG1530	2.8.1.1	-	-	-	AT4G35770	ATSEN1	Rhodanese/Cell cycle control phosphatase superfamily protein	Rhodanese/Cell cycle control phosphatase superfamily protein	Senescence-associated gene that is strongly induced by phosphate starvation. Transcripts are differentially regulated at the level of mRNA stability at different times of day. mRNAs are targets of the mRNA degradation pathway mediated by the downstream (DST) instability determinant.	SENESCENCE 1 (SEN1); FUNCTIONS IN: molecular_function unknown; INVOLVED IN: in 6 processes; LOCATED IN: chloroplast; EXPRESSED IN: 22 plant structures; EXPRESSED DURING: 13 growth stages; CONTAINS InterPro DOMAIN/s: Rhodanese-like (InterPro:IPR001763); BEST Arabidopsis thaliana protein match is: sulfurtransferase protein 16 (TAIR:AT5G66040.1); Has 1680 Blast hits to 1680 proteins in 570 species: …	PF00581	PTHR12231	KOG1530	2.8.1.1	-	-
2	878562	1.3e-07	Ni60	Potri.002G015000	872110	873180	-	3'	5382	2_878562	6.88606	-
2	878562	1.3e-07	Ni60	Potri.002G015100	875720	877295	-	3'	1267	2_878562	6.88606	-	Potri.002G015100	PF00043,PF02798	PTHR11260,PTHR11260:SF287	KOG0867	2.5.1.18	K00799	GO:0005515	-	AT3G03190	ATGSTF11	glutathione S-transferase F11	glutathione S-transferase F11	Encodes glutathione transferase belonging to the phi class of GSTs. Naming convention according to Wagner et al. (2002).	glutathione S-transferase F11 (GSTF11); CONTAINS InterPro DOMAIN/s: Thioredoxin fold (InterPro:IPR012335), Glutathione S-transferase, C-terminal (InterPro:IPR004046), Glutathione S-transferase, C-terminal-like (InterPro:IPR010987), Glutathione S-transferase/chloride channel, C-terminal (InterPro:IPR017933), Glutathione S-transferase, N-terminal (InterPro:IPR004045), Thioredoxin-like fold (InterPr…	PF00043,PF02798	PTHR11260,PTHR11260:SF186	KOG0867	2.5.1.18	K00799	GO:0005515
2	878562	1.3e-07	Ni60	Potri.002G015200	879883	881274	-	5'	1321	2_878562	6.88606	-	Potri.002G015200	PF00043,PF02798	PTHR11260,PTHR11260:SF287	KOG0867	2.5.1.18	K00799	GO:0005515	-	AT3G03190	ATGSTF11	glutathione S-transferase F11	glutathione S-transferase F11	Encodes glutathione transferase belonging to the phi class of GSTs. Naming convention according to Wagner et al. (2002).	glutathione S-transferase F11 (GSTF11); CONTAINS InterPro DOMAIN/s: Thioredoxin fold (InterPro:IPR012335), Glutathione S-transferase, C-terminal (InterPro:IPR004046), Glutathione S-transferase, C-terminal-like (InterPro:IPR010987), Glutathione S-transferase/chloride channel, C-terminal (InterPro:IPR017933), Glutathione S-transferase, N-terminal (InterPro:IPR004045), Thioredoxin-like fold (InterPr…	PF00043,PF02798	PTHR11260,PTHR11260:SF186	KOG0867	2.5.1.18	K00799	GO:0005515
2	878562	1.3e-07	Ni60	Potri.002G015300	884889	885862	-	5'	6327	2_878562	6.88606	-	Potri.002G015300	-	PTHR31618,PTHR31618:SF4	-	-	-	-	-	AT2G17000	-	Mechanosensitive ion channel family protein	Mechanosensitive ion channel family protein	-	Mechanosensitive ion channel family protein; FUNCTIONS IN: molecular_function unknown; INVOLVED IN: transmembrane transport; LOCATED IN: membrane; EXPRESSED IN: embryo, sepal, pedicel; EXPRESSED DURING: 4 anthesis, C globular stage; CONTAINS InterPro DOMAIN/s: Membrane protein, At2g17000, predicted (InterPro:IPR016688), Mechanosensitive ion channel MscS (InterPro:IPR006685), Like-Sm ribonucleopro…	PF00924	PTHR31618,PTHR31618:SF1	-	-	-	GO:0055085,GO:0016020
2	878562	1.3e-07	Ni60	Potri.002G015400	886686	894790	-	5'	8124	2_878562	6.88606	-	Potri.002G015400	PF07714	PTHR23257,PTHR23257:SF347	KOG0192	2.7.12.1	-	GO:0006468,GO:0004672	-	AT4G35780	-	ACT-like protein tyrosine kinase family protein	ACT-like protein tyrosine kinase family protein	-	ACT-like protein tyrosine kinase family protein; FUNCTIONS IN: protein serine/threonine/tyrosine kinase activity, protein kinase activity; INVOLVED IN: protein amino acid phosphorylation, metabolic process; EXPRESSED IN: 23 plant structures; EXPRESSED DURING: 13 growth stages; CONTAINS InterPro DOMAIN/s: Protein kinase, catalytic domain (InterPro:IPR000719), Amino acid-binding ACT (InterPro:IPR00…	PF07714	PTHR23257,PTHR23257:SF492	KOG0192	2.7.12.1	-	GO:0006468,GO:0004672
6	1663790	1.33e-07	Na23	Potri.006G023500	1649436	1660125	-	3'	3665	6_1663790	6.87615	-	Potri.006G023500	PF14631	PTHR32086	-	-	K10891	GO:0006281	-	AT4G14970	-	-	-	-	unknown protein; FUNCTIONS IN: molecular_function unknown; INVOLVED IN: biological_process unknown; LOCATED IN: chloroplast; EXPRESSED IN: 14 plant structures; EXPRESSED DURING: 6 growth stages; Has 257 Blast hits to 164 proteins in 70 species: Archae - 0; Bacteria - 4; Metazoa - 189; Fungi - 0; Plants - 38; Viruses - 0; Other Eukaryotes - 26 (source: NCBI BLink).	PF14631	PTHR32086	-	-	K10891	GO:0006281
6	1663790	1.33e-07	Na23	Potri.006G023600	1666183	1668012	+	5'	2393	6_1663790	6.87615	-	Potri.006G023600	PF00201	PTHR11926,PTHR11926:SF235	KOG1192	2.4.1.324	-	GO:0016758,GO:0008152	-	AT1G22360	AtUGT85A2	UDP-glucosyl transferase 85A2	UDP-glucosyl transferase 85A2	-	UDP-glucosyl transferase 85A2 (UGT85A2); FUNCTIONS IN: UDP-glycosyltransferase activity, transferase activity, transferring glycosyl groups, glucuronosyltransferase activity; INVOLVED IN: metabolic process; LOCATED IN: cellular_component unknown; EXPRESSED IN: 21 plant structures; EXPRESSED DURING: 11 growth stages; CONTAINS InterPro DOMAIN/s: UDP-glucuronosyl/UDP-glucosyltransferase (InterPro:IP…	PF00201	PTHR11926,PTHR11926:SF233	KOG1192	2.4.1.203	-	GO:0016758,GO:0008152
[truncated: 1,187 more rows]
